# Supplementary material for: Comparative Genomics of Lactobacillus acidipiscis ACA-DC 1533 Isolated From Traditional Greek Kopanisti Cheese Against Species Within the Lactobacillus salivarius Clade
Source: Front Microbiol. 2018 Jun 11;9:1244. doi: 10.3389/fmicb.2018.01244 (PMC6004923; doi:10.3389/fmicb.2018.01244)
Supplement: TABLE S3 — Pseudogenes identified in the L. acidipiscis ACA-DC 1533 chromosome. [file Table_3.xlsx]

## Sheet: Supplementary table S3
Supplementary table S3. Pseudogenes identified in the L. acidipiscis ACA-DC 1533 chromosome.
locus_tag	start	stop	annotated function	pseudogene type
LAC1533_RS00135	29053	29259	hypothetical protein	internal stop
LAC1533_RS00175	37845	38265	hypothetical protein	frameshifted
LAC1533_RS00180	<38229	38480	IS200/IS605 family transposase	internal stop and incomplete
LAC1533_RS00235	46786	47757	malate permease	internal stop
LAC1533_RS00320	66569	67879	IS1380 family transposase	internal stop
LAC1533_RS00445	94202	>94414	homoserine dehydrogenase	incomplete
LAC1533_RS00515	109146	>110441	ISL3 family transposase	incomplete
LAC1533_RS00525	111857	112063	hypothetical protein	internal stop
LAC1533_RS00575	123557	123763	hypothetical protein	internal stop
LAC1533_RS00615	135024	136342	Uric acid permease PucJ	frameshifted
LAC1533_RS00745	158652	159895	hypothetical protein	frameshifted
LAC1533_RS00805	172750	>172896	GNAT family N-acetyltransferase	incomplete
LAC1533_RS00810	173009	>173488	transposase	incomplete
LAC1533_RS00820	<175083	175853	transposase	incomplete
LAC1533_RS00830	176631	177008	GNAT family N-acetyltransferase	internal stop
LAC1533_RS00835	177280	177868	site-specific integrase	frameshifted
LAC1533_RS00910	<194544	194810	PTS lactose transporter subunit IIC	frameshifted and incomplete
LAC1533_RS00935	197264	198573	IS1380 family transposase	frameshifted
LAC1533_RS00985	208421	208990	hypothetical protein	internal stop
LAC1533_RS01035	216689	>216870	hypothetical protein	frameshifted and incomplete
LAC1533_RS01130	235903	>238401	DEAD/DEAH box helicase	incomplete
LAC1533_RS01205	253716	255026	IS1380 family transposase	internal stop
LAC1533_RS01225	259583	260893	IS1380 family transposase	internal stop
LAC1533_RS01275	273025	275678	magnesium-transporting ATPase	frameshifted
LAC1533_RS01315	283043	283554	protease	frameshifted
LAC1533_RS01355	289973	290343	hypothetical protein	frameshifted
LAC1533_RS01435	306873	308972	Na+/H+ antiporter	internal stop
LAC1533_RS01460	314071	314277	hypothetical protein	internal stop
LAC1533_RS01525	327491	328677	hypothetical protein	frameshifted
LAC1533_RS01715	365536	>365733	hypothetical protein	incomplete
LAC1533_RS01795	383116	384221	di- and tricarboxylate transporter	frameshifted
LAC1533_RS01805	385119	>386470	hypothetical protein	frameshifted and incomplete
LAC1533_RS01855	396439	397595	MFS transporter	frameshifted
LAC1533_RS01860	397610	398384	IS5/IS1182 family transposase	frameshifted
LAC1533_RS02075	449726	450549	PTS mannose transporter subunit IID	frameshifted
LAC1533_RS02085	452587	452793	hypothetical protein	internal stop
LAC1533_RS02095	454387	>455034	hypothetical protein	incomplete
LAC1533_RS02235	489154	489360	hypothetical protein	internal stop
LAC1533_RS02240	489309	490694	group II intron reverse transcriptase/maturase	internal stop
LAC1533_RS02375	521638	522036	hypothetical protein	internal stop
LAC1533_RS02470	544648	545150	O-acetyl-ADP-ribose deacetylase	frameshifted
LAC1533_RS02650	587406	588783	cell wall anchor protein	frameshifted and internal stop
LAC1533_RS02755	611491	612675	amidohydrolase	internal stop
LAC1533_RS02875	<639655	640458	LytR family transcriptional regulator	internal stop and incomplete
LAC1533_RS02880	640559	>641521	oxidoreductase	incomplete
LAC1533_RS02895	<642684	643698	peptidase M13	frameshifted and incomplete
LAC1533_RS02965	656378	659169	haloacid dehalogenase	frameshifted
LAC1533_RS03090	687171	688136	alcohol dehydrogenase AdhP	frameshifted
LAC1533_RS03095	688636	689813	IS256 family transposase	frameshifted
LAC1533_RS03125	698119	699057	ABC transporter ATP-binding protein	internal stop
LAC1533_RS03185	709747	711093	PTS cellobiose transporter subunit IIC	internal stop
LAC1533_RS03210	715677	716236	ECF transporter S component	frameshifted
LAC1533_RS03215	716243	717966	heme ABC transporter ATP-binding protein	frameshifted and internal stop
LAC1533_RS03270	728814	729020	hypothetical protein	internal stop
LAC1533_RS03280	729554	730329	IS5/IS1182 family transposase	frameshifted
LAC1533_RS03290	731531	732318	hypothetical protein	frameshifted
LAC1533_RS03320	739573	740348	IS5/IS1182 family transposase	frameshifted
LAC1533_RS03370	750678	750884	hypothetical protein	internal stop
LAC1533_RS03480	772276	773582	IS1380 family transposase	frameshifted
LAC1533_RS03695	821398	821604	hypothetical protein	internal stop
LAC1533_RS03775	840948	841154	hypothetical protein	internal stop
LAC1533_RS03790	<842862	844157	ISL3 family transposase	incomplete
LAC1533_RS04275	945708	945914	hypothetical protein	internal stop
LAC1533_RS04285	<947330	948625	ISL3 family transposase	incomplete
LAC1533_RS04305	952393	>953688	ISL3 family transposase	incomplete
LAC1533_RS04315	955104	955310	hypothetical protein	internal stop
LAC1533_RS04800	1038634	1039810	IS256 family transposase	frameshifted
LAC1533_RS04850	1048334	1048540	hypothetical protein	internal stop
LAC1533_RS05185	1122987	1123193	hypothetical protein	internal stop
LAC1533_RS05560	1204915	1205121	hypothetical protein	internal stop
LAC1533_RS05570	<120653	7 1207832	ISL3 family transposase	incomplete
LAC1533_RS05580	1208752	1210051	IS1380 family transposase	frameshifted
LAC1533_RS05585	1210260	1211450	hypothetical protein	internal stop
LAC1533_RS05640	1223035	1223241	hypothetical protein	internal stop
LAC1533_RS05915	1265950	>1266807	hypothetical protein	incomplete
LAC1533_RS06060	1298636	1298842	hypothetical protein	internal stop
LAC1533_RS06065	1298791	1300175	group II intron reverse transcriptase/maturase	frameshifted
LAC1533_RS06070	<130025	7 1301552	ISL3 family transposase	incomplete
LAC1533_RS06085	1306725	1306931	hypothetical protein	internal stop
LAC1533_RS06305	1355289	1356385	NADH-dependent flavin oxidoreductase	frameshifted
LAC1533_RS06345	1362838	1363531	noncanonical pyrimidine nucleotidase, YjjG family	frameshifted and internal stop
LAC1533_RS06380	1369650	1370975	orotidine 5-phosphate decarboxylase	internal stop
LAC1533_RS06390	1371961	1375148	carbamoyl phosphate synthase large subunit	frameshifted
LAC1533_RS06405	1377530	1378479	aspartate carbamoyltransferase	frameshifted
LAC1533_RS06450	1387078	1387284	hypothetical protein	internal stop
LAC1533_RS06575	1414217	1414423	hypothetical protein	internal stop
LAC1533_RS06820	1461785	1464011	polyribonucleotide nucleotidyltransferase	frameshifted
LAC1533_RS07230	1551687	1551893	hypothetical protein	internal stop
LAC1533_RS07250	1556064	1556443	hypothetical protein	frameshifted
LAC1533_RS07285	1562213	1562517	addiction module toxin RelE	frameshifted
LAC1533_RS07315	<156554	9 1565656	hypothetical protein	incomplete
LAC1533_RS07415	1580713	>1581795	IS256 family transposase	incomplete
LAC1533_RS07430	<158394	7 1584045	transposase	incomplete
LAC1533_RS07580	1611204	1611410	hypothetical protein	internal stop
LAC1533_RS07630	1622205	>1623500	ISL3 family transposase	incomplete
LAC1533_RS07640	1624915	1625121	hypothetical protein	internal stop
LAC1533_RS07650	1626806	1627012	hypothetical protein	internal stop
LAC1533_RS07680	1629811	>1631106	ISL3 family transposase	incomplete
LAC1533_RS07690	1632522	1632728	hypothetical protein	internal stop
LAC1533_RS07960	1690320	1690526	hypothetical protein	internal stop
LAC1533_RS08000	1699645	1700312	dithiol-disulfide isomerase	frameshifted
LAC1533_RS08055	1710977	1712107	hypothetical protein	frameshifted and internal stop
LAC1533_RS08305	1758032	1759417	group II intron reverse transcriptase/maturase	internal stop
LAC1533_RS08310	1759366	1759572	hypothetical protein	internal stop
LAC1533_RS08325	1762236	>1763531	ISL3 family transposase	incomplete
LAC1533_RS08335	1764947	1765153	hypothetical protein	internal stop
LAC1533_RS08345	1766838	1767044	hypothetical protein	internal stop
LAC1533_RS08410	<178030	0 1780509	transposase	incomplete
LAC1533_RS08420	1780881	1782266	group II intron reverse transcriptase/maturase	internal stop
LAC1533_RS08425	1782215	1782421	hypothetical protein	internal stop
LAC1533_RS08485	1796209	1797347	nuclease	frameshifted
LAC1533_RS08495	1797956	1799890	hypothetical protein	internal stop
LAC1533_RS08515	1803098	1804440	DEAD/DEAH box helicase	frameshifted and internal stop
LAC1533_RS08570	1813214	1814413	phage portal protein	internal stop
LAC1533_RS08610	1818592	1820250	serine recombinase	internal stop
LAC1533_RS09070	1903055	1903261	hypothetical protein	internal stop
LAC1533_RS09265	1945264	1946913	peptide ABC transporter substrate-binding protein	internal stop
LAC1533_RS09315	1955906	1956112	hypothetical protein	internal stop
LAC1533_RS09325	<1958074	1958388	transposase	incomplete
LAC1533_RS09330	1958378	1958559	hypothetical protein	frameshifted
LAC1533_RS09340	1959171	>1959416	hypothetical protein	incomplete
LAC1533_RS09530	2003013	2003677	methionine ABC transporter permease	frameshifted
LAC1533_RS09570	2011831	2012665	sugar ABC transporter permease	frameshifted
LAC1533_RS09625	2024760	2025120	hypothetical protein	frameshifted and internal stop
LAC1533_RS09870	2069529	2069735	hypothetical protein	internal stop
LAC1533_RS09920	2080304	2084151	alpha-1,2-mannosidase	frameshifted and internal stop
LAC1533_RS09930	2086933	2088027	PTS fructose transporter subunit IIC	internal stop
LAC1533_RS10015	2102849	2103624	tyrosine protein phosphatase	frameshifted
LAC1533_RS10060	2111784	2112693	glycine/betaine ABC transporter	frameshifted
LAC1533_RS10070	2114797	2116755	asparagine synthase (glutamine-hydrolyzing)	internal stop
LAC1533_RS10085	2120129	>2121418	IS1380 family transposase	incomplete
LAC1533_RS10095	2123201	2124169	glycerate dehydrogenase	internal stop
LAC1533_RS10100	2124183	2125079	xylose isomerase	internal stop
LAC1533_RS10125	2127958	2128844	2-hydroxy-3-oxopropionate reductase	frameshifted
LAC1533_RS10155	2133290	2134182	IS982 family transposase	frameshifted
LAC1533_RS10250	2152020	2153326	IS1380 family transposase	frameshifted
LAC1533_RS10280	2160885	>2162180	ISL3 family transposase	incomplete
LAC1533_RS10290	2163596	2163802	hypothetical protein	internal stop
LAC1533_RS10295	2164276	>2165571	ISL3 family transposase	incomplete
LAC1533_RS10305	2166987	2167193	hypothetical protein	internal stop
LAC1533_RS10315	2172272	2173166	IS982 family transposase	frameshifted
LAC1533_RS10410	2194021	2195208	IS256 family transposase	frameshifted
LAC1533_RS10460	2206588	2206846	transcriptional regulator	frameshifted and internal stop
LAC1533_RS10525	2224518	2225458	ferrochelatase	frameshifted
LAC1533_RS10570	2232760	>2234055	ISL3 family transposase	incomplete
LAC1533_RS10580	2235471	2235677	hypothetical protein	internal stop
LAC1533_RS10585	2236181	2237251	hypothetical protein	internal stop
LAC1533_RS10680	2254296	2254502	hypothetical protein	internal stop
LAC1533_RS10850	2291111	2291989	IS982 family transposase	internal stop
LAC1533_RS10860	2293567	2293773	hypothetical protein	internal stop
LAC1533_RS10980	2313121	2314047	alpha/beta hydrolase	internal stop
LAC1533_RS11040	2326607	2327456	short-chain dehydrogenase/reductase	frameshifted
LAC1533_RS11155	2354901	2355585	GTP pyrophosphokinase	frameshifted
LAC1533_RS11205	2363913	2364680	branched-chain amino acid transporter AzlC	internal stop
LAC1533_RS11230	2368066	2370884	ABC transporter permease	frameshifted
LAC1533_RS11275	2381810	2382585	IS5/IS1182 family transposase	frameshifted
LAC1533_RS11340	<239488	7 2395306	transcriptional regulator	incomplete
LAC1533_RS11355	2399119	2400434	IS1380 family transposase	frameshifted
LAC1533_RS11365	<240244	3 2402652	transposase	incomplete
LAC1533_RS11440	2421000	2421206	hypothetical protein	internal stop
LAC1533_RS11485	2428346	2429676	amino acid permease	frameshifted
LAC1533_RS11530	2443155	2443693	LemA family protein	frameshifted
LAC1533_RS11535	2444393	>2445109	glycine/betaine ABC transporter	incomplete
LAC1533_RS11605	2458603	2458975	nucleotide pyrophosphohydrolase	frameshifted
LAC1533_RS11610	2459208	2460394	IS256 family transposase	frameshifted and internal stop
LAC1533_RS11640	2467852	2469351	MFS transporter	internal stop
LAC1533_RS11685	2475505	2476406	hypothetical protein	frameshifted and internal stop
LAC1533_RS11695	2478063	2478269	hypothetical protein	internal stop
LAC1533_RS11785	<249674	5 2497176	helicase	incomplete
LAC1533_RS11815	2500436	2500642	hypothetical protein	internal stop
LAC1533_RS11930	<252761	4 2527853	aspartate - ammonia ligase	incomplete
LAC1533_RS11960	2534558	2535867	IS1380 family transposase	frameshifted
