# Supplementary material for: Comparative Genomics of Lactobacillus acidipiscis ACA-DC 1533 Isolated From Traditional Greek Kopanisti Cheese Against Species Within the Lactobacillus salivarius Clade
Source: Front Microbiol. 2018 Jun 11;9:1244. doi: 10.3389/fmicb.2018.01244 (PMC6004923; doi:10.3389/fmicb.2018.01244)
Supplement: TABLE S4 — (A) Pan-genome analysis among the three L. acidipiscis strains calculated with the EDGAR software. (B) Core-genome among the three L. acidipiscis strains calculated with the EDGAR software. (C) Singletons of the three L. acidipiscis strains calculated with the EDGAR software. [file Table_4.xlsx]

## Sheet: Supplementary table S4A
Supplementary table S4A. Pan-genome analysis among the three L. acidipiscis strains calculated with the EDGAR software.
Lactobacillus acidipiscis ACA-DC 1533		Lactobacillus acidipiscis KCTC 13900		Lactobacillus acidipiscis JCM 10692T
locus_tag	annotated function	locus_tag	annotated function	locus_tag	annotated function
LAC1533_RS00005	chromosomal replication initiator protein DnaA	GSS_RS03115	chromosomal replication initiator protein DnaA	Lacidipiscis_RS10985	chromosomal replication initiator protein DnaA
LAC1533_RS00010	DNA polymerase III subunit beta	GSS_RS03110	DNA polymerase III subunit beta	Lacidipiscis_RS10990	DNA polymerase III subunit beta
LAC1533_RS00015	S4 domain-containing protein YaaA	GSS_RS03105	S4 domain-containing protein YaaA	Lacidipiscis_RS10995	S4 domain-containing protein YaaA
LAC1533_RS00020	DNA replication and repair protein RecF	GSS_RS03100	DNA replication and repair protein RecF	Lacidipiscis_RS11000	DNA replication and repair protein RecF
LAC1533_RS00025	DNA topoisomerase (ATP-hydrolyzing) subunit B	GSS_RS03095	DNA topoisomerase (ATP-hydrolyzing) subunit B	Lacidipiscis_RS11005	DNA topoisomerase (ATP-hydrolyzing) subunit B
LAC1533_RS00030	DNA gyrase subunit A	GSS_RS03090	DNA gyrase subunit A	Lacidipiscis_RS11010	DNA gyrase subunit A
LAC1533_RS00035	30S ribosomal protein S6	GSS_RS03085	30S ribosomal protein S6	Lacidipiscis_RS11015	30S ribosomal protein S6
LAC1533_RS00040	single-stranded DNA-binding protein	GSS_RS03080	single-stranded DNA-binding protein	Lacidipiscis_RS11020	single-stranded DNA-binding protein
LAC1533_RS00045	30S ribosomal protein S18	GSS_RS03075	30S ribosomal protein S18	Lacidipiscis_RS11025	30S ribosomal protein S18
LAC1533_RS00050	GntR family transcriptional regulator	GSS_RS03070	GntR family transcriptional regulator	Lacidipiscis_RS11030	GntR family transcriptional regulator
LAC1533_RS00055	beta-galactosidase			Lacidipiscis_RS11045	beta-galactosidase
LAC1533_RS00060	PTS mannose/fructose/sorbose transporter subunit IIB	GSS_RS03060	PTS mannose/fructose/sorbose transporter subunit IIB	Lacidipiscis_RS11050	PTS mannose/fructose/sorbose transporter subunit IIB
LAC1533_RS00065	PTS sugar transporter subunit IIC	GSS_RS03055	PTS sugar transporter subunit IIC
LAC1533_RS00070	PTS fructose transporter subunit IID	GSS_RS03050	PTS fructose transporter subunit IID
LAC1533_RS00075	PTS fructose transporter subunit IIA	GSS_RS03045	PTS fructose transporter subunit IIA	Lacidipiscis_RS11055	hypothetical protein
LAC1533_RS00080	SIS domain-containing protein	GSS_RS03040	SIS domain-containing protein	Lacidipiscis_RS11060	SIS domain-containing protein
LAC1533_RS00085	N-acetylglucosamine-6-phosphate deacetylase	GSS_RS03035	N-acetylglucosamine-6-phosphate deacetylase
LAC1533_RS00090	DeoR/GlpR transcriptional regulator	GSS_RS03030	DeoR/GlpR transcriptional regulator	Lacidipiscis_RS11070	DeoR/GlpR transcriptional regulator
LAC1533_RS00095	ABC transporter ATP-binding protein	GSS_RS03025	ABC transporter ATP-binding protein	Lacidipiscis_RS11075	ABC transporter ATP-binding protein
LAC1533_RS00100	ABC transporter permease			Lacidipiscis_RS11080	ABC transporter permease
LAC1533_RS00105	GntR family transcriptional regulator	GSS_RS03015	GntR family transcriptional regulator	Lacidipiscis_RS11085	GntR family transcriptional regulator
LAC1533_RS00110	ABC transporter ATP-binding protein	GSS_RS03010	ABC transporter ATP-binding protein	Lacidipiscis_RS11090	ABC transporter ATP-binding protein
LAC1533_RS00115	hypothetical protein	GSS_RS03005	hypothetical protein	Lacidipiscis_RS11095	hypothetical protein
LAC1533_RS00120	DHH family phosphoesterase	GSS_RS03000	DHH family phosphoesterase	Lacidipiscis_RS11100	DHH family phosphoesterase
LAC1533_RS00125	50S ribosomal protein L9	GSS_RS02995	50S ribosomal protein L9	Lacidipiscis_RS11105	50S ribosomal protein L9
LAC1533_RS00130	replicative DNA helicase	GSS_RS02990	replicative DNA helicase	Lacidipiscis_RS11110	replicative DNA helicase
LAC1533_RS00140 IDENTICAL PARALOGS LAC1533_RS09865	group II intron reverse transcriptase/maturase
LAC1533_RS00145	IS1380 family transposase
LAC1533_RS00150	phosphate/phosphite/phosphonate ABC transporter substrate-binding protein	GSS_RS02985	phosphate/phosphite/phosphonate ABC transporter substrate-binding protein	Lacidipiscis_RS11115	phosphate/phosphite/phosphonate ABC transporter substrate-binding protein
LAC1533_RS00155	phosphonate ABC transporter ATP-binding protein	GSS_RS02980	phosphonate ABC transporter ATP-binding protein	Lacidipiscis_RS11120	phosphonate ABC transporter ATP-binding protein
LAC1533_RS00160	phosphonate ABC transporter, permease protein PhnE	GSS_RS02975	phosphonate ABC transporter, permease protein PhnE	Lacidipiscis_RS11125	phosphonate ABC transporter, permease protein PhnE
LAC1533_RS00165	phosphonate ABC transporter, permease protein PhnE	GSS_RS02970	phosphonate ABC transporter, permease protein PhnE	Lacidipiscis_RS11130	phosphonate ABC transporter, permease protein PhnE
LAC1533_RS00170	bifunctional metallophosphatase/5-nucleotidase	GSS_RS02965	bifunctional metallophosphatase/5-nucleotidase	Lacidipiscis_RS11135	bifunctional metallophosphatase/5-nucleotidase
LAC1533_RS00185	DUF4867 domain-containing protein	GSS_RS02960	DUF4867 domain-containing protein	Lacidipiscis_RS11145	DUF4867 domain-containing protein
LAC1533_RS00190	tagatose-6-phosphate kinase	GSS_RS02955	tagatose-6-phosphate kinase	Lacidipiscis_RS11150	tagatose-6-phosphate kinase
LAC1533_RS00195	PTS sugar transporter subunit IIA	GSS_RS02950	PTS sugar transporter subunit IIA	Lacidipiscis_RS11155	PTS sugar transporter subunit IIA
LAC1533_RS00200	PTS fructose transporter subunit IIB	GSS_RS02945	PTS fructose transporter subunit IIB	Lacidipiscis_RS11160	PTS fructose transporter subunit IIB
LAC1533_RS00205	PTS glucitol transporter subunit IIA	GSS_RS02940	PTS glucitol transporter subunit IIA	Lacidipiscis_RS11165	PTS glucitol transporter subunit IIA
LAC1533_RS00210	hypothetical protein	GSS_RS02935	hypothetical protein	Lacidipiscis_RS11170	hypothetical protein
LAC1533_RS00215	DeoR/GlpR transcriptional regulator	GSS_RS02930	DeoR/GlpR transcriptional regulator	Lacidipiscis_RS11175	DeoR/GlpR transcriptional regulator
LAC1533_RS00220	galactose-6-phosphate isomerase subunit LacA	GSS_RS02925	galactose-6-phosphate isomerase subunit LacA	Lacidipiscis_RS11180	galactose-6-phosphate isomerase subunit LacA
LAC1533_RS00225	galactose-6-phosphate isomerase subunit LacB	GSS_RS02920	galactose-6-phosphate isomerase subunit LacB	Lacidipiscis_RS11185	galactose-6-phosphate isomerase subunit LacB
LAC1533_RS00230	tagatose-bisphosphate aldolase	GSS_RS02915	tagatose-bisphosphate aldolase	Lacidipiscis_RS11190	tagatose-bisphosphate aldolase
LAC1533_RS00240	NAD-dependent malic enzyme			Lacidipiscis_RS11200	NAD-dependent malic enzyme
LAC1533_RS00245	LysR family transcriptional regulator
LAC1533_RS00250	hypothetical protein			Lacidipiscis_RS11205	LysR family transcriptional regulator
LAC1533_RS00255	PRD domain-containing protein			Lacidipiscis_RS11210	PRD domain-containing protein
LAC1533_RS00260	PTS lactose/cellobiose transporter subunit IIA			Lacidipiscis_RS11215	PTS lactose/cellobiose transporter subunit IIA
LAC1533_RS00265	6-phospho-beta-galactosidase
LAC1533_RS00270	PTS lactose transporter subunit IIBC	GSS_RS02910	PTS lactose transporter subunit IIBC
LAC1533_RS00275	LacI family DNA-binding transcriptional regulator	GSS_RS02905	LacI family DNA-binding transcriptional regulator
LAC1533_RS00280	6-phospho-beta-galactosidase	GSS_RS02900	6-phospho-beta-galactosidase
LAC1533_RS00285	PTS lactose transporter subunit IIB	GSS_RS02895	PTS lactose transporter subunit IIB
LAC1533_RS00290	methylglyoxal synthase	GSS_RS02890	methylglyoxal synthase
LAC1533_RS00295	hypothetical protein
LAC1533_RS00300 IDENTICAL PARALOGS LAC1533_RS09250	IS30 family transposase	GSS_RS11500	IS30 family transposase	Lacidipiscis_RS04130	IS30 family transposase
LAC1533_RS00305	hypothetical protein	GSS_RS12410	hypothetical protein
LAC1533_RS00310	hypothetical protein	GSS_RS02875	hypothetical protein
LAC1533_RS00315	hypothetical protein
LAC1533_RS00325	hypothetical protein	GSS_RS02870	hypothetical protein
LAC1533_RS00330	butanediol dehydrogenase	GSS_RS02865	butanediol dehydrogenase	Lacidipiscis_RS02750	butanediol dehydrogenase
LAC1533_RS00335	LysR family transcriptional regulator	GSS_RS02860	LysR family transcriptional regulator	Lacidipiscis_RS02755	LysR family transcriptional regulator
LAC1533_RS00340	class II fumarate hydratase	GSS_RS02855	class II fumarate hydratase	Lacidipiscis_RS02760	class II fumarate hydratase
LAC1533_RS00345	flavocytochrome c	GSS_RS02850	flavocytochrome c	Lacidipiscis_RS02765	flavocytochrome c
LAC1533_RS00350	anion permease	GSS_RS02845	anion permease	Lacidipiscis_RS02770	anion permease
LAC1533_RS00355	LysR family transcriptional regulator	GSS_RS02840	LysR family transcriptional regulator
LAC1533_RS00360	FAD-binding protein	GSS_RS02835	FAD-binding protein	Lacidipiscis_RS02780	FAD-binding protein
LAC1533_RS00365	SDR family NAD(P)-dependent oxidoreductase	GSS_RS02830	SDR family NAD(P)-dependent oxidoreductase	Lacidipiscis_RS02785	SDR family NAD(P)-dependent oxidoreductase
LAC1533_RS00370	FAD-binding protein	GSS_RS02825	FAD-binding protein	Lacidipiscis_RS02790	FAD-binding protein
LAC1533_RS00375	MFS transporter
LAC1533_RS00380	MFS transporter
LAC1533_RS00385	hypothetical protein	GSS_RS02810	hypothetical protein
LAC1533_RS00390	aldo/keto reductase	GSS_RS02805	aldo/keto reductase	Lacidipiscis_RS02800	aldo/keto reductase
LAC1533_RS00395	NAD(P)-dependent oxidoreductase	GSS_RS02800	NAD(P)-dependent oxidoreductase	Lacidipiscis_RS02805	NAD(P)-dependent oxidoreductase
LAC1533_RS00400	L-lactate oxidase	GSS_RS02795	L-lactate oxidase	Lacidipiscis_RS02810	L-lactate oxidase
LAC1533_RS00405	FAD-binding oxidoreductase	GSS_RS02790	FAD-binding oxidoreductase
LAC1533_RS00410	LacI family DNA-binding transcriptional regulator	GSS_RS02785	LacI family DNA-binding transcriptional regulator	Lacidipiscis_RS02820	LacI family DNA-binding transcriptional regulator
LAC1533_RS00415	FAD-binding protein	GSS_RS02780	FAD-binding protein	Lacidipiscis_RS02825	FAD-binding protein
LAC1533_RS00420	FAD-binding protein	GSS_RS02775	FAD-binding protein	Lacidipiscis_RS02830	FAD-binding protein
LAC1533_RS00425	hypothetical protein	GSS_RS02770	hypothetical protein	Lacidipiscis_RS02835	hypothetical protein
LAC1533_RS00430	FAD-binding protein	GSS_RS02765	FAD-binding protein	Lacidipiscis_RS02840	FAD-binding protein
LAC1533_RS00435	Cof-type HAD-IIB family hydrolase	GSS_RS02760	Cof-type HAD-IIB family hydrolase
LAC1533_RS00440	hypothetical protein	GSS_RS13685	hypothetical protein
LAC1533_RS00450	amino acid ABC transporter permease	GSS_RS02750	amino acid ABC transporter permease
LAC1533_RS00455	amino acid ABC transporter ATP-binding protein	GSS_RS02745	amino acid ABC transporter ATP-binding protein
LAC1533_RS00460	amino acid ABC transporter substrate-binding protein	GSS_RS02740	amino acid ABC transporter substrate-binding protein
LAC1533_RS00465	hypothetical protein	GSS_RS02735	hypothetical protein
LAC1533_RS00470	cell surface protein	GSS_RS02730	cell surface protein
LAC1533_RS00475	iron ABC transporter substrate-binding protein	GSS_RS02725	iron ABC transporter substrate-binding protein
LAC1533_RS00480	iron compound ABC transporter permease	GSS_RS02720	iron compound ABC transporter permease
LAC1533_RS00485	ABC transporter ATP-binding protein	GSS_RS02715	ABC transporter ATP-binding protein
LAC1533_RS00490	cytosine deaminase	GSS_RS02710	cytosine deaminase
LAC1533_RS00495 IDENTICAL PARALOGS LAC1533_RS05535 IDENTICAL PARALOGS LAC1533_RS06750	IS30 family transposase	GSS_RS11395	IS30 family transposase	Lacidipiscis_RS08455	IS30 family transposase
LAC1533_RS00500	MFS transporter
LAC1533_RS00505	DoxX family membrane protein
LAC1533_RS00510	glutaryl-CoA dehydrogenase
LAC1533_RS00520 IDENTICAL PARALOGS LAC1533_RS01465 IDENTICAL PARALOGS LAC1533_RS02090 IDENTICAL PARALOGS LAC1533_RS05565 IDENTICAL PARALOGS LAC1533_RS06445 IDENTICAL PARALOGS LAC1533_RS07575 IDENTICAL PARALOGS LAC1533_RS10300 IDENTICAL PARALOGS LAC1533_RS10575	group II intron reverse transcriptase/maturase
LAC1533_RS00530	LysR family transcriptional regulator	GSS_RS02705	LysR family transcriptional regulator
LAC1533_RS00535	acetyl-CoA C-acetyltransferase	GSS_RS02700	acetyl-CoA C-acetyltransferase
LAC1533_RS00540	acyl-CoA dehydrogenase	GSS_RS02695	acyl-CoA dehydrogenase
LAC1533_RS00545	3-hydroxybutyryl-CoA dehydrogenase	GSS_RS02690	3-hydroxybutyryl-CoA dehydrogenase
LAC1533_RS00550	crotonase	GSS_RS02685	crotonase
LAC1533_RS00555	4-hydroxybutyrate CoA-transferase	GSS_RS12400	4-hydroxybutyrate CoA-transferase
LAC1533_RS00560	AEC family transporter	GSS_RS02670	AEC family transporter	Lacidipiscis_RS02850	AEC family transporter
LAC1533_RS00565	hypothetical protein	GSS_RS02665	hypothetical protein	Lacidipiscis_RS02855	hypothetical protein
LAC1533_RS00570	adenylosuccinate synthase	GSS_RS02660	adenylosuccinate synthase	Lacidipiscis_RS02860	adenylosuccinate synthase
LAC1533_RS00580	group II intron reverse transcriptase/maturase
LAC1533_RS00585	ISL3 family transposase	GSS_RS02655	ISL3 family transposase	Lacidipiscis_RS02050	ISL3 family transposase
LAC1533_RS00590	formate C-acetyltransferase	GSS_RS02645	formate C-acetyltransferase	Lacidipiscis_RS02055	formate C-acetyltransferase
LAC1533_RS00595	pyruvate formate lyase-activating protein	GSS_RS02640	pyruvate formate lyase-activating protein	Lacidipiscis_RS02060	pyruvate formate lyase-activating protein
LAC1533_RS00600 IDENTICAL PARALOGS LAC1533_RS06950 IDENTICAL PARALOGS LAC1533_RS07095 IDENTICAL PARALOGS LAC1533_RS12165	transposase
LAC1533_RS00605 IDENTICAL PARALOGS LAC1533_RS01135 IDENTICAL PARALOGS LAC1533_RS02865 IDENTICAL PARALOGS LAC1533_RS03470 IDENTICAL PARALOGS LAC1533_RS03575 IDENTICAL PARALOGS LAC1533_RS08020	ISL3 family transposase	GSS_RS11420	ISL3 family transposase	Lacidipiscis_RS03185	ISL3 family transposase
LAC1533_RS00610	zinc-binding alcohol dehydrogenase family protein	GSS_RS02630	zinc-binding alcohol dehydrogenase family protein	Lacidipiscis_RS02065	zinc-binding alcohol dehydrogenase family protein
LAC1533_RS00620	sensor protein LytS			Lacidipiscis_RS02075	sensor protein LytS
LAC1533_RS00625	DNA-binding response regulator	GSS_RS02615	DNA-binding response regulator
LAC1533_RS00630	murein hydrolase regulator LrgA	GSS_RS12390	murein hydrolase regulator LrgA
LAC1533_RS00635	antiholin	GSS_RS02605	antiholin
LAC1533_RS00640	2-hydroxyacid dehydrogenase	GSS_RS02600	2-hydroxyacid dehydrogenase	Lacidipiscis_RS07565	hydroxyacid dehydrogenase
LAC1533_RS00645	hypothetical protein	GSS_RS02595	hypothetical protein	Lacidipiscis_RS07570	hypothetical protein
LAC1533_RS00650 IDENTICAL PARALOGS LAC1533_RS09450 IDENTICAL PARALOGS LAC1533_RS12185	IS982 family transposase ISLpl4	GSS_RS11510	IS982 family transposase ISLpl4	Lacidipiscis_RS05750	IS982 family transposase ISLpl4
LAC1533_RS00655	adenine deaminase	GSS_RS12385	adenine deaminase	Lacidipiscis_RS07585	adenine deaminase
LAC1533_RS00660	hypothetical protein	GSS_RS13680	hypothetical protein
LAC1533_RS00665	metal ABC transporter substrate-binding protein	GSS_RS02585	metal ABC transporter substrate-binding protein	Lacidipiscis_RS07590	metal ABC transporter substrate-binding protein
LAC1533_RS00670	30S ribosomal protein S14	GSS_RS02580	30S ribosomal protein S14	Lacidipiscis_RS07595	30S ribosomal protein S14
LAC1533_RS00675	cysteine synthase family protein	GSS_RS02575	cysteine synthase family protein	Lacidipiscis_RS11450	hypothetical protein
LAC1533_RS00680	PLP-dependent transferase	GSS_RS02570	PLP-dependent transferase	Lacidipiscis_RS11455	PLP-dependent transferase
LAC1533_RS00685	serine acetyltransferase	GSS_RS02565	serine acetyltransferase	Lacidipiscis_RS11460	serine acetyltransferase
LAC1533_RS00690	acyl-CoA thioesterase	GSS_RS02560	acyl-CoA thioesterase	Lacidipiscis_RS11465	acyl-CoA thioesterase
LAC1533_RS00695	threonine/serine exporter	GSS_RS02555	threonine/serine exporter	Lacidipiscis_RS11470	threonine/serine exporter
LAC1533_RS00700	threonine/serine exporter	GSS_RS02550	threonine/serine exporter	Lacidipiscis_RS11475	threonine/serine exporter
LAC1533_RS00705	NupC/NupG family nucleoside CNT transporter	GSS_RS02545	nucleoside transporter	Lacidipiscis_RS11480	nucleoside permease
LAC1533_RS00710	NCS2 family permease	GSS_RS02540	NCS2 family permease	Lacidipiscis_RS11485	NCS2 family permease
LAC1533_RS00715	EAL domain-containing protein	GSS_RS12380	EAL domain-containing protein	Lacidipiscis_RS11490	hypothetical protein
LAC1533_RS00720	hypothetical protein	GSS_RS13995	hypothetical protein
LAC1533_RS00725	hypothetical protein	GSS_RS02525	hypothetical protein	Lacidipiscis_RS11495	hypothetical protein
LAC1533_RS00730	hypothetical protein
LAC1533_RS00735	GGDEF domain-containing protein	GSS_RS13675	GGDEF domain-containing protein
LAC1533_RS00740	IS256 family transposase	GSS_RS11425	IS256 family transposase
LAC1533_RS00750	peptide ABC transporter substrate-binding protein	GSS_RS02510	peptide ABC transporter substrate-binding protein	Lacidipiscis_RS12325	peptide ABC transporter substrate-binding protein
LAC1533_RS00755	peroxide stress protein YaaA	GSS_RS02505	peroxide stress protein YaaA	Lacidipiscis_RS12320	peroxide stress protein YaaA
LAC1533_RS00760	hypothetical protein	GSS_RS02495	hypothetical protein	Lacidipiscis_RS12315	hypothetical protein
LAC1533_RS00770	NADPH:quinone reductase	GSS_RS02485	NADPH:quinone reductase	Lacidipiscis_RS12305	NADPH:quinone reductase
LAC1533_RS00775	YitT family protein	GSS_RS02480	YitT family protein	Lacidipiscis_RS12300	YitT family protein
LAC1533_RS00780	APC family permease	GSS_RS02475	APC family permease	Lacidipiscis_RS12295	APC family permease
LAC1533_RS00785	ornithine decarboxylase	GSS_RS02470	ornithine decarboxylase	Lacidipiscis_RS12290	ornithine decarboxylase
LAC1533_RS00790	hypothetical protein	GSS_RS13990	hypothetical protein	Lacidipiscis_RS12285	hypothetical protein
LAC1533_RS00795	hypothetical protein	GSS_RS13670	hypothetical protein	Lacidipiscis_RS12280	hypothetical protein
LAC1533_RS00800	DUF2992 domain-containing protein	GSS_RS02455	DUF2992 domain-containing protein	Lacidipiscis_RS12275	DUF2992 domain-containing protein
LAC1533_RS00815 IDENTICAL PARALOGS LAC1533_RS02100 IDENTICAL PARALOGS LAC1533_RS06710 IDENTICAL PARALOGS LAC1533_RS07160 IDENTICAL PARALOGS LAC1533_RS07270 IDENTICAL PARALOGS LAC1533_RS07930 IDENTICAL PARALOGS LAC1533_RS10065 IDENTICAL PARALOGS LAC1533_RS11625 IDENTICAL PARALOGS LAC1533_RS12035	IS1380 family transposase
LAC1533_RS00825 IDENTICAL PARALOGS LAC1533_RS07320 IDENTICAL PARALOGS LAC1533_RS07425 IDENTICAL PARALOGS LAC1533_RS10245	transposase	GSS_RS11565	ATPase AAA
LAC1533_RS00840	TetR/AcrR family transcriptional regulator	GSS_RS02430	TetR/AcrR family transcriptional regulator	Lacidipiscis_RS00720	TetR/AcrR family transcriptional regulator
LAC1533_RS00845	ABC transporter permease	GSS_RS02425	ABC transporter permease	Lacidipiscis_RS00725	ABC transporter permease
LAC1533_RS00850	ABC transporter ATP-binding protein	GSS_RS02420	ABC transporter ATP-binding protein	Lacidipiscis_RS07105	ABC transporter ATP-binding protein
LAC1533_RS00855	dihydroxyacetone kinase subunit DhaK	GSS_RS02415	dihydroxyacetone kinase subunit DhaK	Lacidipiscis_RS00735	dihydroxyacetone kinase subunit DhaK
LAC1533_RS00860	dihydroxyacetone kinase subunit L			Lacidipiscis_RS00740	dihydroxyacetone kinase subunit L
LAC1533_RS00865	PTS-dependent dihydroxyacetone kinase phosphotransferase subunit DhaM	GSS_RS02405	PTS-dependent dihydroxyacetone kinase phosphotransferase subunit DhaM	Lacidipiscis_RS00745	PTS-dependent dihydroxyacetone kinase phosphotransferase subunit DhaM
LAC1533_RS00870	glycerol kinase	GSS_RS02400	glycerol kinase	Lacidipiscis_RS00750	glycerol kinase
LAC1533_RS00875	type 1 glycerol-3-phosphate oxidase	GSS_RS02395	type 1 glycerol-3-phosphate oxidase	Lacidipiscis_RS00755	type 1 glycerol-3-phosphate oxidase
LAC1533_RS00880	aquaporin family protein	GSS_RS02390	aquaporin family protein	Lacidipiscis_RS00760	aquaporin family protein
LAC1533_RS00885	GntR family transcriptional regulator	GSS_RS02385	GntR family transcriptional regulator	Lacidipiscis_RS00765	GntR family transcriptional regulator
LAC1533_RS00890	PTS sugar transporter subunit IIC	GSS_RS02380	PTS sugar transporter subunit IIC	Lacidipiscis_RS00770	PTS sugar transporter subunit IIC
LAC1533_RS00895	DUF3284 domain-containing protein	GSS_RS02375	DUF3284 domain-containing protein	Lacidipiscis_RS00775	DUF3284 domain-containing protein
LAC1533_RS00900 IDENTICAL PARALOGS LAC1533_RS01490 IDENTICAL PARALOGS LAC1533_RS03150 IDENTICAL PARALOGS LAC1533_RS04075 IDENTICAL PARALOGS LAC1533_RS04080 IDENTICAL PARALOGS LAC1533_RS04435	hypothetical protein	GSS_RS11350	hypothetical protein
LAC1533_RS00905	DUF871 domain-containing protein	GSS_RS02370	DUF871 domain-containing protein
LAC1533_RS00915	hypothetical protein	GSS_RS13980	hypothetical protein	Lacidipiscis_RS00790	PTS sugar transporter subunit IIB
LAC1533_RS00920	GNAT family N-acetyltransferase	GSS_RS13665	GNAT family N-acetyltransferase	Lacidipiscis_RS00795	GNAT family N-acetyltransferase
LAC1533_RS00925	GNAT family N-acetyltransferase	GSS_RS12345	GNAT family N-acetyltransferase
LAC1533_RS00930	chitosanase
LAC1533_RS00940	DUF3290 domain-containing protein	GSS_RS02345	DUF3290 domain-containing protein	Lacidipiscis_RS00805	DUF3290 domain-containing protein
LAC1533_RS00945	DUF421 domain-containing protein	GSS_RS02340	DUF421 domain-containing protein	Lacidipiscis_RS00715	DUF421 domain-containing protein
LAC1533_RS00950	hypothetical protein	GSS_RS12335	cytidyltransferase-like domain-containing protein	Lacidipiscis_RS09390	hypothetical protein
LAC1533_RS00955	LysR family transcriptional regulator	GSS_RS13655	LysR family transcriptional regulator	Lacidipiscis_RS09385	LysR family transcriptional regulator
LAC1533_RS00960	glycerol kinase	GSS_RS02320	glycerol kinase	Lacidipiscis_RS09380	glycerol kinase
LAC1533_RS00965	glycerol-3-phosphate dehydrogenase/oxidase	GSS_RS02315	glycerol-3-phosphate dehydrogenase/oxidase	Lacidipiscis_RS09375	glycerol-3-phosphate dehydrogenase/oxidase
LAC1533_RS00970	hypothetical protein	GSS_RS12325	hypothetical protein	Lacidipiscis_RS09370	hypothetical protein
LAC1533_RS00975 IDENTICAL PARALOGS LAC1533_RS01280 IDENTICAL PARALOGS LAC1533_RS01565 IDENTICAL PARALOGS LAC1533_RS01950 IDENTICAL PARALOGS LAC1533_RS02860 IDENTICAL PARALOGS LAC1533_RS05380 IDENTICAL PARALOGS LAC1533_RS07280 IDENTICAL PARALOGS LAC1533_RS08060	transposase
LAC1533_RS00990	glutamate ABC transporter substrate-binding protein	GSS_RS02290	glutamate ABC transporter substrate-binding protein	Lacidipiscis_RS00875	glutamate ABC transporter substrate-binding protein
LAC1533_RS00995	amino acid ABC transporter permease	GSS_RS02285	amino acid ABC transporter permease	Lacidipiscis_RS00880	amino acid ABC transporter permease
LAC1533_RS01000	aspartate aminotransferase	GSS_RS02280	aspartate aminotransferase	Lacidipiscis_RS00885	aspartate aminotransferase
LAC1533_RS01005	lactate dehydrogenase	GSS_RS02275	lactate dehydrogenase	Lacidipiscis_RS00890	lactate dehydrogenase
LAC1533_RS01010	ZIP family metal transporter	GSS_RS02270	ZIP family metal transporter	Lacidipiscis_RS00895	ZIP family metal transporter
LAC1533_RS01020	histidine phosphatase family protein	GSS_RS02260	histidine phosphatase family protein	Lacidipiscis_RS00905	histidine phosphatase family protein
LAC1533_RS01025	N-acetyltransferase	GSS_RS02255	N-acetyltransferase	Lacidipiscis_RS00910	N-acetyltransferase
LAC1533_RS01030	glycosyltransferase family 8 protein	GSS_RS02250	glycosyltransferase family 8 protein	Lacidipiscis_RS00915	glycosyltransferase family 8 protein
LAC1533_RS01040	hypothetical protein	GSS_RS02240	hypothetical protein	Lacidipiscis_RS00925	hypothetical protein
LAC1533_RS01045	hypothetical protein	GSS_RS02235	membrane protein	Lacidipiscis_RS00930	hypothetical protein
LAC1533_RS01050	pyridoxal kinase	GSS_RS02230	pyridoxal kinase	Lacidipiscis_RS00935	pyridoxal kinase
LAC1533_RS01055	DNA-binding response regulator	GSS_RS02225	DNA-binding response regulator	Lacidipiscis_RS00940	DNA-binding response regulator
LAC1533_RS01060	cell wall metabolism sensor histidine kinase WalK	GSS_RS02220	cell wall metabolism sensor histidine kinase WalK	Lacidipiscis_RS00945	cell wall metabolism sensor histidine kinase WalK
LAC1533_RS01065	hypothetical protein	GSS_RS02215	hypothetical protein	Lacidipiscis_RS00950	hypothetical protein
LAC1533_RS01070	hypothetical protein	GSS_RS02210	hypothetical protein	Lacidipiscis_RS00955	hypothetical protein
LAC1533_RS01075	DUF1634 domain-containing protein	GSS_RS02205	DUF1634 domain-containing protein	Lacidipiscis_RS06485	DUF1634 domain-containing protein
LAC1533_RS01080	sulfite exporter TauE/SafE family protein	GSS_RS02200	sulfite exporter TauE/SafE family protein	Lacidipiscis_RS06490	sulfite exporter TauE/SafE family protein
LAC1533_RS01085	MBL fold metallo-hydrolase	GSS_RS02195	MBL fold metallo-hydrolase	Lacidipiscis_RS06495	MBL fold metallo-hydrolase
LAC1533_RS01090	PDZ domain-containing protein	GSS_RS02190	PDZ domain-containing protein	Lacidipiscis_RS12675	PDZ domain-containing protein
LAC1533_RS01095 IDENTICAL PARALOGS LAC1533_RS01980 IDENTICAL PARALOGS LAC1533_RS08320 IDENTICAL PARALOGS LAC1533_RS10275 IDENTICAL PARALOGS LAC1533_RS11335	IS30 family transposase	GSS_RS11460	IS30 family transposase	Lacidipiscis_RS11325 IDENTICAL PARALOGS Lacidipiscis_RS08300	IS30 family transposase
LAC1533_RS01100	23S rRNA (pseudouridine(1915)-N(3))-methyltransferase RlmH	GSS_RS02185	23S rRNA (pseudouridine(1915)-N(3))-methyltransferase RlmH	Lacidipiscis_RS08660	23S rRNA (pseudouridine(1915)-N(3))-methyltransferase RlmH
LAC1533_RS01105	SAM-dependent DNA methyltransferase
LAC1533_RS01110	restriction endonuclease
LAC1533_RS01115	type I restriction endonuclease	GSS_RS02155	type I restriction modification protein
LAC1533_RS01120	integrase	GSS_RS02165	integrase
LAC1533_RS01125	hypothetical protein
LAC1533_RS01140	DUF3387 domain-containing protein
LAC1533_RS01145	DUF1516 domain-containing protein	GSS_RS02145	DUF1516 domain-containing protein	Lacidipiscis_RS08665	DUF1516 domain-containing protein
LAC1533_RS01150	hypothetical protein	GSS_RS02140	hypothetical protein
LAC1533_RS01155	TetR/AcrR family transcriptional regulator	GSS_RS02135	TetR/AcrR family transcriptional regulator
LAC1533_RS01160	membrane protein	GSS_RS02130	membrane protein	Lacidipiscis_RS00200	hypothetical protein
LAC1533_RS01165	ClC family H(+)/Cl(-) exchange transporter	GSS_RS02125	ClC family H(+)/Cl(-) exchange transporter	Lacidipiscis_RS00205	ClC family H(+)/Cl(-) exchange transporter
LAC1533_RS01170	ATPase	GSS_RS02120	MoxR-like ATPase	Lacidipiscis_RS00210	ATPase
LAC1533_RS01175	hypothetical protein	GSS_RS02115	hypothetical protein	Lacidipiscis_RS00215	hypothetical protein
LAC1533_RS01180	hypothetical protein	GSS_RS02110	hypothetical protein	Lacidipiscis_RS00220	hypothetical protein
LAC1533_RS01185	hypothetical protein	GSS_RS02105	hypothetical protein	Lacidipiscis_RS00225	hypothetical protein
LAC1533_RS01190	NADPH-dependent oxidoreductase	GSS_RS02100	NADPH-dependent oxidoreductase	Lacidipiscis_RS00230	NADPH-dependent oxidoreductase
LAC1533_RS01195	hypothetical protein	GSS_RS02095	hypothetical protein	Lacidipiscis_RS00235	hypothetical protein
LAC1533_RS01200	AraC family transcriptional regulator			Lacidipiscis_RS00240	AraC family transcriptional regulator
LAC1533_RS01210	MFS transporter	GSS_RS02080	MFS transporter	Lacidipiscis_RS00255	MFS transporter
LAC1533_RS01215	50S ribosomal protein L4	GSS_RS13970	50S ribosomal protein L4	Lacidipiscis_RS00250	50S ribosomal protein L4
LAC1533_RS01220	pyruvate oxidase	GSS_RS12305	pyruvate oxidase
LAC1533_RS01230	amino acid permease	GSS_RS02075	amino acid permease	Lacidipiscis_RS00260	amino acid permease
LAC1533_RS01235	aspartate aminotransferase family protein	GSS_RS02070	aspartate aminotransferase family protein	Lacidipiscis_RS00265	4-aminobutyrate aminotransferase
LAC1533_RS01240	hypothetical protein	GSS_RS02065	hypothetical protein	Lacidipiscis_RS00280	hypothetical protein
LAC1533_RS01245	ABC transporter substrate-binding protein	GSS_RS02060	inosine-uridine nucleoside N-ribohydrolase	Lacidipiscis_RS00285	ABC transporter substrate-binding protein
LAC1533_RS01250	glycine betaine/L-proline ABC transporter ATP-binding protein	GSS_RS02055	glycine betaine/L-proline ABC transporter ATP-binding protein	Lacidipiscis_RS00290	glycine betaine/L-proline ABC transporter ATP-binding protein
LAC1533_RS01255 IDENTICAL PARALOGS LAC1533_RS11550	glycine/betaine ABC transporter	GSS_RS13385	glycine/betaine ABC transporter	Lacidipiscis_RS00295	glycine/betaine ABC transporter
LAC1533_RS01260 IDENTICAL PARALOGS LAC1533_RS11545	glycine/betaine ABC transporter	GSS_RS11315	glycine/betaine ABC transporter	Lacidipiscis_RS00465	glycine/betaine ABC transporter
LAC1533_RS01265	transposase			Lacidipiscis_RS00630	hypothetical protein
LAC1533_RS01270	glycosyltransferase family 1 protein	GSS_RS02050	glycosyltransferase family 1 protein	Lacidipiscis_RS00310	glycosyltransferase family 1 protein
LAC1533_RS01285	IS256 family transposase
LAC1533_RS01290	magnesium transporter CorA family protein	GSS_RS02040	magnesium transporter CorA family protein	Lacidipiscis_RS00320	magnesium transporter CorA family protein
LAC1533_RS01295	Cof-type HAD-IIB family hydrolase	GSS_RS02035	Cof-type HAD-IIB family hydrolase	Lacidipiscis_RS00325	Cof-type HAD-IIB family hydrolase
LAC1533_RS01300	flavoprotein	GSS_RS02030	flavoprotein	Lacidipiscis_RS00330	NADPH-dependent FMN reductase
LAC1533_RS01305	hypothetical protein	GSS_RS13965	hypothetical protein
LAC1533_RS01310	transcriptional regulator	GSS_RS02020	transcriptional regulator
LAC1533_RS01320	type 1 glutamine amidotransferase	GSS_RS02010	type 1 glutamine amidotransferase
LAC1533_RS01325	TetR/AcrR family transcriptional regulator	GSS_RS02005	TetR/AcrR family transcriptional regulator
LAC1533_RS01330	hypothetical protein	GSS_RS02000	hypothetical protein
LAC1533_RS01335	ECF transporter S component	GSS_RS01995	ECF transporter S component
LAC1533_RS01340	hypothetical protein	GSS_RS01985	hypothetical protein
LAC1533_RS01345	IS30 family transposase
LAC1533_RS01350	IS256 family transposase
LAC1533_RS01360	ArsR family transcriptional regulator			Lacidipiscis_RS00345	ArsR family transcriptional regulator
LAC1533_RS01365	IS30 family transposase
LAC1533_RS01370	DUF1648 domain-containing protein	GSS_RS01970	DUF1648 domain-containing protein	Lacidipiscis_RS00350	DUF1648 domain-containing protein
LAC1533_RS01375	YhgE/Pip domain-containing protein	GSS_RS01965	YhgE/Pip domain-containing protein	Lacidipiscis_RS00355	YhgE/Pip domain-containing protein
LAC1533_RS01380	PAP2 family protein	GSS_RS01955	PAP2 family protein	Lacidipiscis_RS00360	PAP2 family protein
LAC1533_RS01385	patatin family protein	GSS_RS01950	patatin family protein	Lacidipiscis_RS00365	patatin family protein
LAC1533_RS01390	hypothetical protein	GSS_RS01945	hypothetical protein
LAC1533_RS01395	hypothetical protein	GSS_RS01940	hypothetical protein	Lacidipiscis_RS00375	hypothetical protein
LAC1533_RS01400	LysM domain-containing protein	GSS_RS01930	LysM domain-containing protein	Lacidipiscis_RS00380	LysM peptidoglycan-binding domain-containing protein
LAC1533_RS01405	aspartate kinase	GSS_RS01925	aspartate kinase	Lacidipiscis_RS00385	aspartate kinase
LAC1533_RS01410	phosphatidylglycerophosphatase A	GSS_RS01920	phosphatidylglycerophosphatase A	Lacidipiscis_RS00390	phosphatidylglycerophosphatase A
LAC1533_RS01415	hydrolase	GSS_RS01915	hydrolase	Lacidipiscis_RS00395	hydrolase
LAC1533_RS01420	L-lactate dehydrogenase	GSS_RS01910	L-lactate dehydrogenase	Lacidipiscis_RS00400	L-lactate dehydrogenase
LAC1533_RS01425	branched-chain amino acid aminotransferase	GSS_RS01905	branched-chain amino acid aminotransferase	Lacidipiscis_RS00405	branched-chain amino acid aminotransferase
LAC1533_RS01430	resolvase	GSS_RS12285	resolvase	Lacidipiscis_RS00410	resolvase
LAC1533_RS01440	alpha-glucosidase	GSS_RS01890	alpha-glucosidase	Lacidipiscis_RS00420	alpha-glucosidase
LAC1533_RS01445	PTS sugar transporter subunit IIC	GSS_RS01885	PTS sugar transporter subunit IIC	Lacidipiscis_RS00425	PTS sugar transporter subunit IIC
LAC1533_RS01450	sugar O-acetyltransferase	GSS_RS01880	sugar O-acetyltransferase	Lacidipiscis_RS00430	sugar O-acetyltransferase
LAC1533_RS01455	N-acetyltransferase	GSS_RS01875	N-acetyltransferase	Lacidipiscis_RS00435	N-acetyltransferase
LAC1533_RS01470	hypothetical protein	GSS_RS01870	hypothetical protein	Lacidipiscis_RS07705	hypothetical protein
LAC1533_RS01475	hypothetical protein	GSS_RS01865	hypothetical protein	Lacidipiscis_RS07710	hypothetical protein
LAC1533_RS01480	ATPase	GSS_RS01860	ATPase	Lacidipiscis_RS07715	ATPase
LAC1533_RS01485	DUF3862 domain-containing protein	GSS_RS01855	DUF3862 domain-containing protein	Lacidipiscis_RS07720	DUF3862 domain-containing protein
LAC1533_RS01495	acyl-CoA thioesterase			Lacidipiscis_RS07725	acyl-CoA thioesterase
LAC1533_RS01500	ABC transporter ATP-binding protein			Lacidipiscis_RS07730	ABC transporter ATP-binding protein
LAC1533_RS01505	ABC transporter ATP-binding protein			Lacidipiscis_RS07735	ABC transporter ATP-binding protein
LAC1533_RS01510	ABC transporter permease			Lacidipiscis_RS07740	ABC transporter permease
LAC1533_RS01515	ABC transporter permease			Lacidipiscis_RS07745	ABC transporter permease
LAC1533_RS01520	oligopeptide ABC transporter substrate-binding protein			Lacidipiscis_RS07750	peptide ABC transporter substrate-binding protein
LAC1533_RS01530	multidrug ABC transporter permease/ATP-binding protein			Lacidipiscis_RS07760	multidrug ABC transporter ATP-binding protein
LAC1533_RS01535	ABC transporter ATP-binding protein			Lacidipiscis_RS07765	ABC transporter ATP-binding protein
LAC1533_RS01540	hypothetical protein	GSS_RS01810	hypothetical protein	Lacidipiscis_RS07770	hypothetical protein
LAC1533_RS01545	LysR family transcriptional regulator	GSS_RS12270	LysR family transcriptional regulator
LAC1533_RS01550	flavocytochrome c	GSS_RS01800	flavocytochrome c	Lacidipiscis_RS07780	flavocytochrome c
LAC1533_RS01555	dipeptide epimerase	GSS_RS01795	dipeptide epimerase	Lacidipiscis_RS07785	dipeptide epimerase
LAC1533_RS01560	3-oxoacyl-ACP reductase			Lacidipiscis_RS07790	3-oxoacyl-ACP reductase
LAC1533_RS01570	oleate hydratase	GSS_RS01785	oleate hydratase	Lacidipiscis_RS07795	oleate hydratase
LAC1533_RS01575	proline iminopeptidase			Lacidipiscis_RS07800	proline iminopeptidase
LAC1533_RS01580	glycine/betaine ABC transporter			Lacidipiscis_RS07805	glycine/betaine ABC transporter
LAC1533_RS01585	hypothetical protein	GSS_RS01770	hypothetical protein	Lacidipiscis_RS07810	hypothetical protein
LAC1533_RS01590	NUDIX domain-containing protein	GSS_RS01765	NUDIX domain-containing protein	Lacidipiscis_RS07815	NUDIX domain-containing protein
LAC1533_RS01595	MFS transporter	GSS_RS01760	MFS transporter	Lacidipiscis_RS07820	MFS transporter
LAC1533_RS01600	phosphoglycolate phosphatase	GSS_RS01755	phosphoglycolate phosphatase	Lacidipiscis_RS07825	HAD family hydrolase
LAC1533_RS01605	NADP-specific glutamate dehydrogenase	GSS_RS01750	NADP-specific glutamate dehydrogenase	Lacidipiscis_RS07830	NADP-specific glutamate dehydrogenase
LAC1533_RS01610	NADP oxidoreductase	GSS_RS12250	NADP oxidoreductase	Lacidipiscis_RS08855	NADP oxidoreductase
LAC1533_RS01615	LLM class flavin-dependent oxidoreductase	GSS_RS01740	LLM class flavin-dependent oxidoreductase	Lacidipiscis_RS08860	LLM class flavin-dependent oxidoreductase
LAC1533_RS01620	IS30 family transposase
LAC1533_RS01625	LLM class flavin-dependent oxidoreductase
LAC1533_RS01630	2-hydroxyacid dehydrogenase	GSS_RS01735	2-hydroxyacid dehydrogenase	Lacidipiscis_RS08865	hydroxyacid dehydrogenase
LAC1533_RS01635	Hsp20/alpha crystallin family protein	GSS_RS01730	Hsp20/alpha crystallin family protein	Lacidipiscis_RS08870	Hsp20/alpha crystallin family protein
LAC1533_RS01640	GNAT family N-acetyltransferase	GSS_RS01725	GNAT family N-acetyltransferase	Lacidipiscis_RS08875	GNAT family N-acetyltransferase
LAC1533_RS01645	hypothetical protein	GSS_RS01720	hypothetical protein	Lacidipiscis_RS08880	hypothetical protein
LAC1533_RS01650	hypothetical protein	GSS_RS01715	hypothetical protein	Lacidipiscis_RS08885	hypothetical protein
LAC1533_RS01655	peptide ABC transporter substrate-binding protein	GSS_RS01710	peptide ABC transporter substrate-binding protein
LAC1533_RS01660	NAD-dependent succinate-semialdehyde dehydrogenase	GSS_RS01705	NAD-dependent succinate-semialdehyde dehydrogenase
LAC1533_RS01665	hypothetical protein	GSS_RS01700	hypothetical protein	Lacidipiscis_RS04820	hypothetical protein
LAC1533_RS01670	malate permease	GSS_RS01695	malate permease	Lacidipiscis_RS04825	hypothetical protein
LAC1533_RS01675	malate permease	GSS_RS01690	malate permease	Lacidipiscis_RS04830	hypothetical protein
LAC1533_RS01680	hypothetical protein	GSS_RS01685	hypothetical protein	Lacidipiscis_RS04835	hypothetical protein
LAC1533_RS01685	DNA helicase	GSS_RS01680	DNA helicase
LAC1533_RS01690	hypothetical protein
LAC1533_RS01695	DNA-binding protein	GSS_RS13455	DNA-binding protein
LAC1533_RS01700	XRE family transcriptional regulator	GSS_RS11550	XRE family transcriptional regulator
LAC1533_RS01705	XRE family transcriptional regulator	GSS_RS01675	XRE family transcriptional regulator
LAC1533_RS01710	ImmA/IrrE family metallo-endopeptidase	GSS_RS01670	ImmA/IrrE family metallo-endopeptidase
LAC1533_RS01720	DUF5067 domain-containing protein	GSS_RS01655	DUF5067 domain-containing protein
LAC1533_RS01725	hypothetical protein
LAC1533_RS01730	IS30 family transposase
LAC1533_RS01735	SHOCT domain-containing protein	GSS_RS13955	SHOCT domain-containing protein
LAC1533_RS01740	site-specific integrase	GSS_RS01640	site-specific integrase
LAC1533_RS01745	aldehyde dehydrogenase	GSS_RS12240	aldehyde dehydrogenase	Lacidipiscis_RS12635	aldehyde dehydrogenase
LAC1533_RS01750	MarR family transcriptional regulator	GSS_RS12235	MarR family transcriptional regulator	Lacidipiscis_RS12640	MarR family transcriptional regulator
LAC1533_RS01755	ABC transporter ATP-binding protein	GSS_RS01625	ABC transporter ATP-binding protein	Lacidipiscis_RS12645	ABC transporter ATP-binding protein
LAC1533_RS01760	ABC transporter ATP-binding protein	GSS_RS01620	ABC transporter ATP-binding protein	Lacidipiscis_RS12650	ABC transporter ATP-binding protein
LAC1533_RS01765	hypothetical protein	GSS_RS01615	hypothetical protein	Lacidipiscis_RS12655	hypothetical protein
LAC1533_RS01770 IDENTICAL PARALOGS LAC1533_RS02220 IDENTICAL PARALOGS LAC1533_RS06075 IDENTICAL PARALOGS LAC1533_RS07310 IDENTICAL PARALOGS LAC1533_RS07955 IDENTICAL PARALOGS LAC1533_RS09890 IDENTICAL PARALOGS LAC1533_RS09960 IDENTICAL PARALOGS LAC1533_RS11060 IDENTICAL PARALOGS LAC1533_RS11955	IS1380 family transposase	GSS_RS11340	IS1380 family transposase
LAC1533_RS01775	MFS transporter			Lacidipiscis_RS00975	MFS transporter
LAC1533_RS01780	hypothetical protein	GSS_RS01605	MarR family transcriptional regulator	Lacidipiscis_RS00980	MarR family transcriptional regulator
LAC1533_RS01785	IS1380 family transposase
LAC1533_RS01790	CsbD family protein	GSS_RS01595	CsbD family protein	Lacidipiscis_RS01005	CsbD family protein
LAC1533_RS01800	OsmC family peroxiredoxin			Lacidipiscis_RS01015	OsmC family peroxiredoxin
LAC1533_RS01810 IDENTICAL PARALOGS LAC1533_RS02005 IDENTICAL PARALOGS LAC1533_RS03100 IDENTICAL PARALOGS LAC1533_RS04825 IDENTICAL PARALOGS LAC1533_RS07620 IDENTICAL PARALOGS LAC1533_RS11575	IS1380 family transposase			Lacidipiscis_RS02450	IS1380 family transposase
LAC1533_RS01815	membrane protein	GSS_RS01575	membrane protein	Lacidipiscis_RS01030	membrane protein
LAC1533_RS01820	fructosamine kinase	GSS_RS01565	fructosamine-3-kinase	Lacidipiscis_RS01035	fructosamine kinase
LAC1533_RS01825	AI-2E family transporter	GSS_RS12220	AI-2E family transporter	Lacidipiscis_RS01040	AI-2E family transporter
LAC1533_RS01830	SDR family NAD(P)-dependent oxidoreductase	GSS_RS01555	SDR family NAD(P)-dependent oxidoreductase	Lacidipiscis_RS01045	SDR family NAD(P)-dependent oxidoreductase
LAC1533_RS01835	TrkA family potassium uptake protein	GSS_RS01550	TrkA family potassium uptake protein	Lacidipiscis_RS01050	TrkA family potassium uptake protein
LAC1533_RS01840	Trk family potassium uptake protein	GSS_RS01545	Trk family potassium uptake protein	Lacidipiscis_RS01055	ATP synthase subunit J
LAC1533_RS01845	DeoR/GlpR transcriptional regulator	GSS_RS01540	DeoR/GlpR transcriptional regulator	Lacidipiscis_RS01060	DeoR/GlpR transcriptional regulator
LAC1533_RS01850	DUF159 family protein	GSS_RS01535	DUF159 family protein	Lacidipiscis_RS01065	DUF159 family protein
LAC1533_RS01865	peptide-methionine (R)-S-oxide reductase	GSS_RS01525	peptide-methionine (R)-S-oxide reductase	Lacidipiscis_RS01075	peptide-methionine (R)-S-oxide reductase
LAC1533_RS01870	GntR family transcriptional regulator	GSS_RS01520	GntR family transcriptional regulator	Lacidipiscis_RS01080	GntR family transcriptional regulator
LAC1533_RS01875	ABC transporter ATP-binding protein	GSS_RS01515	ABC transporter ATP-binding protein	Lacidipiscis_RS01085	ABC transporter ATP-binding protein
LAC1533_RS01880	hypothetical protein	GSS_RS01510	hypothetical protein	Lacidipiscis_RS01090	hypothetical protein
LAC1533_RS01885	BMP family ABC transporter substrate-binding protein	GSS_RS01505	BMP family ABC transporter substrate-binding protein	Lacidipiscis_RS01095	BMP family ABC transporter substrate-binding protein
LAC1533_RS01890	ABC transporter ATP-binding protein	GSS_RS12215	ABC transporter ATP-binding protein	Lacidipiscis_RS01100	ABC transporter ATP-binding protein
LAC1533_RS01895	ABC transporter permease	GSS_RS12210	ABC transporter permease	Lacidipiscis_RS01105	ABC transporter permease
LAC1533_RS01900	ABC transporter permease	GSS_RS01490	ABC transporter permease	Lacidipiscis_RS01110	ABC transporter permease
LAC1533_RS01905 IDENTICAL PARALOGS LAC1533_RS03555 IDENTICAL PARALOGS LAC1533_RS03705 IDENTICAL PARALOGS LAC1533_RS04875 IDENTICAL PARALOGS LAC1533_RS05320 IDENTICAL PARALOGS LAC1533_RS10145 IDENTICAL PARALOGS LAC1533_RS12275	hypothetical protein	GSS_RS13400	hypothetical protein
LAC1533_RS01910	LemA family protein			Lacidipiscis_RS01115	LemA family protein
LAC1533_RS01915	TPM domain-containing protein	GSS_RS01480	TPM domain-containing protein	Lacidipiscis_RS01120	TPM domain-containing protein
LAC1533_RS01920	demethylmenaquinone methyltransferase	GSS_RS01475	demethylmenaquinone methyltransferase	Lacidipiscis_RS01125	demethylmenaquinone methyltransferase
LAC1533_RS01925	antibiotic biosynthesis monooxygenase	GSS_RS01470	antibiotic biosynthesis monooxygenase	Lacidipiscis_RS01130	antibiotic biosynthesis monooxygenase
LAC1533_RS01930	hypothetical protein	GSS_RS01465	hypothetical protein	Lacidipiscis_RS01135	hypothetical protein
LAC1533_RS01935	CPBP family intramembrane metalloprotease	GSS_RS01460	CPBP family intramembrane metalloprotease	Lacidipiscis_RS01140	CPBP family intramembrane metalloprotease
LAC1533_RS01940	MFS transporter	GSS_RS01455	MFS transporter
LAC1533_RS01945	DUF4811 domain-containing protein	GSS_RS01450	DUF4811 domain-containing protein	Lacidipiscis_RS01150	DUF4811 domain-containing protein
LAC1533_RS01955	DNA polymerase III subunit alpha	GSS_RS08945	DNA polymerase III subunit alpha	Lacidipiscis_RS01155	DNA polymerase III subunit alpha
LAC1533_RS01960	LD-carboxypeptidase	GSS_RS08950	LD-carboxypeptidase	Lacidipiscis_RS01160	LD-carboxypeptidase
LAC1533_RS01965	peptide ABC transporter substrate-binding protein	GSS_RS08955	peptide ABC transporter substrate-binding protein
LAC1533_RS01970	D-aminopeptidase	GSS_RS08960	D-aminopeptidase	Lacidipiscis_RS06205	aminopeptidase
LAC1533_RS01975	glycerophosphoryl diester phosphodiesterase	GSS_RS08965	glycerophosphoryl diester phosphodiesterase	Lacidipiscis_RS06210	glycerophosphodiester phosphodiesterase
LAC1533_RS01985	sulfate ABC transporter ATP-binding protein			Lacidipiscis_RS03925	sulfate ABC transporter ATP-binding protein
LAC1533_RS01990	APC family permease			Lacidipiscis_RS03930	APC family permease
LAC1533_RS01995 IDENTICAL PARALOGS LAC1533_RS02625 IDENTICAL PARALOGS LAC1533_RS04385 IDENTICAL PARALOGS LAC1533_RS05130 IDENTICAL PARALOGS LAC1533_RS07085 IDENTICAL PARALOGS LAC1533_RS10750 IDENTICAL PARALOGS LAC1533_RS11020	IS1380 family transposase	GSS_RS11335	IS1380 family transposase
LAC1533_RS02000 IDENTICAL PARALOGS LAC1533_RS08405 IDENTICAL PARALOGS LAC1533_RS11360	hypothetical protein	GSS_RS11495	transposase
LAC1533_RS02010	IS66 family insertion sequence hypothetical protein	GSS_RS05460	IS66 family insertion sequence hypothetical protein
LAC1533_RS02015 IDENTICAL PARALOGS LAC1533_RS08415 IDENTICAL PARALOGS LAC1533_RS11370	hypothetical protein	GSS_RS05465	hypothetical protein	Lacidipiscis_RS02640	hypothetical protein
LAC1533_RS02020	L-lactate oxidase	GSS_RS08970	L-lactate oxidase	Lacidipiscis_RS03935	L-lactate oxidase
LAC1533_RS02025	formate-nitrite transporter	GSS_RS08975	formate/nitrite transporter	Lacidipiscis_RS03940	formate/nitrite transporter
LAC1533_RS02030	hypothetical protein	GSS_RS13065	permease domain-containing protein	Lacidipiscis_RS03945	hypothetical protein
LAC1533_RS02035	protein-tyrosine-phosphatase	GSS_RS08990	protein-tyrosine-phosphatase
LAC1533_RS02040	NAD(P)-dependent alcohol dehydrogenase	GSS_RS08995	NAD(P)-dependent alcohol dehydrogenase	Lacidipiscis_RS05830	NAD(P)-dependent alcohol dehydrogenase
LAC1533_RS02045	hypothetical protein	GSS_RS13800	hypothetical protein
LAC1533_RS02050	hypothetical protein	GSS_RS13805	hypothetical protein	Lacidipiscis_RS05825	hypothetical protein
LAC1533_RS02055	PRD domain-containing protein	GSS_RS13815	PRD domain-containing protein	Lacidipiscis_RS05820	PRD domain-containing protein
LAC1533_RS02060	PTS fructose IIA component	GSS_RS09005	PTS fructose IIA component	Lacidipiscis_RS04465	PTS fructose IIA subunit
LAC1533_RS02065	PTS mannose/fructose/sorbose transporter subunit IIB	GSS_RS09010	PTS mannose/fructose/sorbose transporter subunit IIB	Lacidipiscis_RS04470	PTS mannose/fructose/sorbose transporter subunit IIB
LAC1533_RS02070	PTS sugar transporter subunit IIC	GSS_RS09015	PTS sugar transporter subunit IIC	Lacidipiscis_RS04475	PTS sugar transporter subunit IIC
LAC1533_RS02080	alpha-glucosidase	GSS_RS09025	alpha-glucosidase	Lacidipiscis_RS04485	alpha-glucosidase
LAC1533_RS02105	hypothetical protein
LAC1533_RS02110	hypothetical protein	GSS_RS09040	hypothetical protein	Lacidipiscis_RS04500	hypothetical protein
LAC1533_RS02115	hypothetical protein	GSS_RS09045	hypothetical protein	Lacidipiscis_RS04505	hypothetical protein
LAC1533_RS02120	Arc family DNA-binding protein	GSS_RS09050	Arc family DNA-binding protein	Lacidipiscis_RS04510	Arc family DNA-binding protein
LAC1533_RS02125	SPFH domain-containing protein	GSS_RS13085	SPFH domain-containing protein	Lacidipiscis_RS04515	SPFH domain-containing protein
LAC1533_RS02130	hypothetical protein			Lacidipiscis_RS04520	hypothetical protein
LAC1533_RS02135	hypothetical protein	GSS_RS09070	hypothetical protein	Lacidipiscis_RS04525	hypothetical protein
LAC1533_RS02140	cation-translocating P-type ATPase	GSS_RS09075	cation-translocating P-type ATPase	Lacidipiscis_RS04530	cation-translocating P-type ATPase
LAC1533_RS02145	NADH peroxidase	GSS_RS09080	NADH peroxidase	Lacidipiscis_RS04535	NAD(FAD)-dependent dehydrogenase
LAC1533_RS02150	N-acetyltransferase	GSS_RS09085	N-acetyltransferase	Lacidipiscis_RS04540	N-acetyltransferase
LAC1533_RS02155	hypothetical protein	GSS_RS09090	hypothetical protein	Lacidipiscis_RS04545	hypothetical protein
LAC1533_RS02160	Na+/H+ antiporter NhaC	GSS_RS09095	Na+/H+ antiporter NhaC	Lacidipiscis_RS04550	Na+/H+ antiporter NhaC
LAC1533_RS02165	family 65 glycosyl hydrolase			Lacidipiscis_RS04555	maltose phosphorylase
LAC1533_RS02170	beta-phosphoglucomutase	GSS_RS09110	beta-phosphoglucomutase	Lacidipiscis_RS04560	beta-phosphoglucomutase
LAC1533_RS02175	LacI family transcriptional regulator	GSS_RS09115	LacI family transcriptional regulator	Lacidipiscis_RS04565	LacI family transcriptional regulator
LAC1533_RS02180 IDENTICAL PARALOGS LAC1533_RS02620 IDENTICAL PARALOGS LAC1533_RS06625 IDENTICAL PARALOGS LAC1533_RS06775 IDENTICAL PARALOGS LAC1533_RS07495 IDENTICAL PARALOGS LAC1533_RS12225	transposase
LAC1533_RS02185	alpha-glucosidase	GSS_RS09120	alpha-glucosidase	Lacidipiscis_RS04570	alpha-glucosidase
LAC1533_RS02190	alpha-glycosidase	GSS_RS09125	alpha-glycosidase	Lacidipiscis_RS04575	alpha-glycosidase
LAC1533_RS02195	carbohydrate ABC transporter substrate-binding protein
LAC1533_RS02200	sugar ABC transporter permease
LAC1533_RS02205	carbohydrate ABC transporter permease
LAC1533_RS02210	hypothetical protein
LAC1533_RS02215	ABC transporter ATP-binding protein	GSS_RS09150	ABC transporter ATP-binding protein	Lacidipiscis_RS04600	ABC transporter ATP-binding protein
LAC1533_RS02225	DJ-1 family protein	GSS_RS09155	DJ-1 family protein	Lacidipiscis_RS04605	DJ-1 family protein
LAC1533_RS02230	hypothetical protein	GSS_RS09160	hypothetical protein	Lacidipiscis_RS04610	hypothetical protein
LAC1533_RS02245	DegV family protein	GSS_RS09165	DegV family protein	Lacidipiscis_RS11685	DegV family protein
LAC1533_RS02250	dipeptidase	GSS_RS09170	dipeptidase	Lacidipiscis_RS11680	dipeptidase
LAC1533_RS02255	NAD(P)H-hydrate epimerase	GSS_RS09175	NAD(P)H-hydrate epimerase	Lacidipiscis_RS04385	NAD(P)H-hydrate epimerase
LAC1533_RS02260	ArsR family transcriptional regulator	GSS_RS09180	ArsR family transcriptional regulator	Lacidipiscis_RS04390	ArsR family transcriptional regulator
LAC1533_RS02265	cation transporter	GSS_RS09185	cation transporter	Lacidipiscis_RS04395	cation transporter
LAC1533_RS02270	hypothetical protein	GSS_RS13820	short-chain dehydrogenase/reductase SDR	Lacidipiscis_RS04400	short-chain dehydrogenase/reductase SDR
LAC1533_RS02275	hypothetical protein	GSS_RS13105	hypothetical protein	Lacidipiscis_RS04180	hypothetical protein
LAC1533_RS02280	alpha/beta hydrolase	GSS_RS09200	alpha/beta hydrolase	Lacidipiscis_RS04185	alpha/beta hydrolase
LAC1533_RS02285	alpha,alpha-phosphotrehalase			Lacidipiscis_RS04190	alpha,alpha-phosphotrehalase
LAC1533_RS02290	trehalose operon repressor			Lacidipiscis_RS04195	trehalose operon repressor
LAC1533_RS02295	hypothetical protein	GSS_RS14175	hypothetical protein	Lacidipiscis_RS04200	hypothetical protein
LAC1533_RS02300	PTS glucose transporter subunit IIBC	GSS_RS13120	PTS glucose transporter subunit IIBC	Lacidipiscis_RS04205	PTS glucose transporter subunit IIBC
LAC1533_RS02305	hypothetical protein	GSS_RS09235	hypothetical protein	Lacidipiscis_RS04210	hypothetical protein
LAC1533_RS02310	NAD(P)-dependent oxidoreductase			Lacidipiscis_RS04215	NAD(P)-dependent oxidoreductase
LAC1533_RS02315	MFS transporter	GSS_RS09245	MFS transporter	Lacidipiscis_RS04220	MFS transporter
LAC1533_RS02320	copper-translocating P-type ATPase	GSS_RS09250	copper-translocating P-type ATPase	Lacidipiscis_RS04225	copper-translocating P-type ATPase
LAC1533_RS02325	glutamate formiminotransferase	GSS_RS09255	glutamate formiminotransferase	Lacidipiscis_RS04230	glutamate formiminotransferase
LAC1533_RS02330	bifunctional 5,10-methylenetetrahydrofolate dehydrogenase/5,10-methenyltetrahydrofolate cyclohydrolase	GSS_RS09260	bifunctional 5,10-methylenetetrahydrofolate dehydrogenase/5,10-methenyltetrahydrofolate cyclohydrolase	Lacidipiscis_RS04235	bifunctional 5,10-methylenetetrahydrofolate dehydrogenase/5,10-methenyltetrahydrofolate cyclohydrolase
LAC1533_RS02335	zinc-binding alcohol dehydrogenase family protein	GSS_RS09265	zinc-binding alcohol dehydrogenase family protein	Lacidipiscis_RS04240	zinc-binding alcohol dehydrogenase family protein
LAC1533_RS02340	o-succinylbenzoate--CoA ligase	GSS_RS09270	o-succinylbenzoate--CoA ligase	Lacidipiscis_RS04245	o-succinylbenzoate--CoA ligase
LAC1533_RS02345	1,4-dihydroxy-2-naphthoyl-CoA synthase	GSS_RS09275	1,4-dihydroxy-2-naphthoyl-CoA synthase	Lacidipiscis_RS04250	1,4-dihydroxy-2-naphthoyl-CoA synthase
LAC1533_RS02350	PaaI family thioesterase	GSS_RS09280	PaaI family thioesterase	Lacidipiscis_RS04255	PaaI family thioesterase
LAC1533_RS02355	replication-associated recombination protein A	GSS_RS09290	replication-associated recombination protein A	Lacidipiscis_RS04260	replication-associated recombination protein A
LAC1533_RS02360	Hsp20/alpha crystallin family protein	GSS_RS09295	Hsp20/alpha crystallin family protein	Lacidipiscis_RS04265	Hsp20/alpha crystallin family protein
LAC1533_RS02365	AarF/ABC1/UbiB kinase family protein	GSS_RS09300	AarF/ABC1/UbiB kinase family protein	Lacidipiscis_RS04270	AarF/ABC1/UbiB kinase family protein
LAC1533_RS02370	peptide ABC transporter substrate-binding protein	GSS_RS09305	peptide ABC transporter substrate-binding protein	Lacidipiscis_RS04275	peptide ABC transporter substrate-binding protein
LAC1533_RS02380	hypothetical protein			Lacidipiscis_RS06190	hypothetical protein
LAC1533_RS02385	carbonic anhydrase	GSS_RS09320	carbonic anhydrase	Lacidipiscis_RS04135	carbonic anhydrase
LAC1533_RS02390	sigma-54-dependent transcriptional regulator	GSS_RS09325	sigma-54-dependent transcriptional regulator	Lacidipiscis_RS04140	sigma-54-dependent transcriptional regulator
LAC1533_RS02395	PTS fructose transporter subunit IIB	GSS_RS09330	PTS fructose transporter subunit IIB	Lacidipiscis_RS04145	PTS fructose transporter subunit IIB
LAC1533_RS02400	PTS mannose transporter subunit IIAB	GSS_RS09335	PTS mannose transporter subunit IIAB	Lacidipiscis_RS04150	PTS mannose transporter subunit IIAB
LAC1533_RS02405	PTS mannose/fructose/sorbose transporter subunit IIC	GSS_RS09340	PTS mannose/fructose/sorbose transporter subunit IIC	Lacidipiscis_RS04155	PTS mannose/fructose/sorbose transporter subunit IIC
LAC1533_RS02410	PTS mannose family transporter subunit IID	GSS_RS09345	PTS mannose transporter subunit IID	Lacidipiscis_RS04160	PTS mannose transporter subunit IID
LAC1533_RS02415	DUF956 domain-containing protein	GSS_RS09350	DUF956 domain-containing protein	Lacidipiscis_RS04165	DUF956 domain-containing protein
LAC1533_RS02435	DUF975 domain-containing protein			Lacidipiscis_RS06995	DUF975 domain-containing protein
LAC1533_RS02440	neopullulanase/cyclomaltodextrinase/maltogenic alpha-amylase	GSS_RS05675	Neopullulanase/cyclomaltodextrinase/maltogenic alpha-amylase	Lacidipiscis_RS07000	neopullulanase/cyclomaltodextrinase/maltogenic alpha-amylase
LAC1533_RS02445	helix-turn-helix domain-containing protein
LAC1533_RS02450	hypothetical protein
LAC1533_RS02455	LysM peptidoglycan-binding domain-containing protein	GSS_RS05680	LysM peptidoglycan-binding domain-containing protein	Lacidipiscis_RS00140	LysM peptidoglycan-binding domain-containing protein
LAC1533_RS02460	LysM peptidoglycan-binding domain-containing protein
LAC1533_RS02465	uracil-DNA glycosylase	GSS_RS05685	uracil-DNA glycosylase	Lacidipiscis_RS03845	uracil-DNA glycosylase
LAC1533_RS02475	folate family ECF transporter S component	GSS_RS05695	folate family ECF transporter S component	Lacidipiscis_RS03835	folate family ECF transporter S component
LAC1533_RS02480	metal ABC transporter permease	GSS_RS05700	metal ABC transporter permease	Lacidipiscis_RS03830	metal ABC transporter permease
LAC1533_RS02485	ABC transporter ATP-binding protein	GSS_RS05705	ABC transporter ATP-binding protein	Lacidipiscis_RS03825	ABC transporter ATP-binding protein
LAC1533_RS02490	QueT transporter family protein	GSS_RS05710	QueT transporter family protein	Lacidipiscis_RS03820	QueT transporter family protein
LAC1533_RS02495	DUF2829 domain-containing protein	GSS_RS05715	DUF2829 domain-containing protein	Lacidipiscis_RS03815	DUF2829 domain-containing protein
LAC1533_RS02500	3-oxoacyl-ACP reductase	GSS_RS05720	3-oxoacyl-ACP reductase	Lacidipiscis_RS03810	3-oxoacyl-ACP reductase
LAC1533_RS02505	HD domain-containing protein	GSS_RS05725	HD domain-containing protein	Lacidipiscis_RS03805	HD domain-containing protein
LAC1533_RS02510	lipase/esterase	GSS_RS05730	lipase/esterase	Lacidipiscis_RS03800	lipase
LAC1533_RS02515	16S rRNA (guanine(527)-N(7))-methyltransferase RsmG	GSS_RS05735	16S rRNA (guanine(527)-N(7))-methyltransferase RsmG	Lacidipiscis_RS03795	16S rRNA (guanine(527)-N(7))-methyltransferase RsmG
LAC1533_RS02520	nucleoid occlusion protein	GSS_RS05740	nucleoid occlusion protein	Lacidipiscis_RS03790	nucleoid occlusion protein
LAC1533_RS02525	ParA family protein	GSS_RS05745	ParA family protein	Lacidipiscis_RS03785	ParA family protein
LAC1533_RS02530	chromosome partitioning protein ParB	GSS_RS05750	chromosome partitioning protein ParB	Lacidipiscis_RS03780	chromosome partitioning protein ParB
LAC1533_RS02535	DUF951 domain-containing protein	GSS_RS14060	DUF951 domain-containing protein	Lacidipiscis_RS03775	DUF951 domain-containing protein
LAC1533_RS02540	redox-regulated ATPase YchF	GSS_RS05760	redox-regulated ATPase YchF	Lacidipiscis_RS03770	redox-regulated ATPase YchF
LAC1533_RS02545	DUF1129 domain-containing protein	GSS_RS05765	DUF1129 domain-containing protein	Lacidipiscis_RS03765	DUF1129 domain-containing protein
LAC1533_RS02550	Cof-type HAD-IIB family hydrolase	GSS_RS05770	Cof-type HAD-IIB family hydrolase	Lacidipiscis_RS03760	Cof-type HAD-IIB family hydrolase
LAC1533_RS02555	gluconate transporter			Lacidipiscis_RS03755	gluconate transporter
LAC1533_RS02560	excinuclease ABC subunit UvrA	GSS_RS05780	excinuclease ABC subunit UvrA	Lacidipiscis_RS03750	excinuclease ABC subunit UvrA
LAC1533_RS02565	serine hydrolase	GSS_RS05785	serine hydrolase
LAC1533_RS02570	histidine phosphatase family protein	GSS_RS05795	histidine phosphatase family protein	Lacidipiscis_RS03740	histidine phosphatase family protein
LAC1533_RS02575	histidine phosphatase family protein	GSS_RS05800	histidine phosphatase family protein	Lacidipiscis_RS03735	histidine phosphatase family protein
LAC1533_RS02580	MFS transporter	GSS_RS05805	MFS transporter	Lacidipiscis_RS03730	MFS transporter
LAC1533_RS02585	glutamate 5-kinase	GSS_RS12675	glutamate 5-kinase	Lacidipiscis_RS03725	glutamate 5-kinase
LAC1533_RS02590	glutamate-5-semialdehyde dehydrogenase	GSS_RS05815	glutamate-5-semialdehyde dehydrogenase	Lacidipiscis_RS03720	glutamate-5-semialdehyde dehydrogenase
LAC1533_RS02595	phosphate/phosphite/phosphonate ABC transporter substrate-binding protein			Lacidipiscis_RS03715	phosphate/phosphite/phosphonate ABC transporter substrate-binding protein
LAC1533_RS02600	aldo/keto reductase	GSS_RS05825	aldo/keto reductase	Lacidipiscis_RS01675	aldo/keto reductase
LAC1533_RS02605	endonuclease III	GSS_RS05830	hypothetical protein	Lacidipiscis_RS01670	endonuclease III
LAC1533_RS02610	ribose-phosphate pyrophosphokinase	GSS_RS05835	ribose-phosphate pyrophosphokinase	Lacidipiscis_RS01665	ribose-phosphate pyrophosphokinase
LAC1533_RS02615	aminopeptidase	GSS_RS05840	aminopeptidase	Lacidipiscis_RS01660	aminopeptidase
LAC1533_RS02630	adenosine deaminase	GSS_RS05845	adenosine deaminase	Lacidipiscis_RS01655	adenosine deaminase
LAC1533_RS02635	hypothetical protein	GSS_RS05850	hypothetical protein	Lacidipiscis_RS01650	hypothetical protein
LAC1533_RS02640	cation-translocating P-type ATPase	GSS_RS05855	cation-translocating P-type ATPase	Lacidipiscis_RS01645	cation-translocating P-type ATPase
LAC1533_RS02645	ABC transporter ATP-binding protein	GSS_RS05865	ABC transporter ATP-binding protein	Lacidipiscis_RS01640	ABC transporter ATP-binding protein
LAC1533_RS02655	dipeptidase	GSS_RS05880	dipeptidase
LAC1533_RS02660	class I SAM-dependent methyltransferase	GSS_RS05885	class I SAM-dependent methyltransferase	Lacidipiscis_RS01625	class I SAM-dependent methyltransferase
LAC1533_RS02665	hypothetical protein	GSS_RS05890	hypothetical protein	Lacidipiscis_RS01620	hypothetical protein
LAC1533_RS02670	MurR/RpiR family transcriptional regulator	GSS_RS05895	MurR/RpiR family transcriptional regulator	Lacidipiscis_RS01615	MurR/RpiR family transcriptional regulator
LAC1533_RS02675	N-acetylmuramic acid 6-phosphate etherase	GSS_RS05900	N-acetylmuramic acid 6-phosphate etherase	Lacidipiscis_RS01610	N-acetylmuramic acid 6-phosphate etherase
LAC1533_RS02680	PTS beta-glucoside transporter subunit EIIBCA	GSS_RS05905	PTS beta-glucoside transporter subunit EIIBCA	Lacidipiscis_RS01605	PTS glucose transporter
LAC1533_RS02685	methionine ABC transporter ATP-binding protein	GSS_RS05910	methionine ABC transporter ATP-binding protein	Lacidipiscis_RS01600	methionine ABC transporter ATP-binding protein
LAC1533_RS02690	ABC transporter permease	GSS_RS05915	ABC transporter permease	Lacidipiscis_RS01595	ABC transporter permease
LAC1533_RS02695	MetQ/NlpA family ABC transporter substrate-binding protein			Lacidipiscis_RS01590	MetQ/NlpA family ABC transporter substrate-binding protein
LAC1533_RS02700	HlyC/CorC family transporter	GSS_RS05930	HlyC/CorC family transporter	Lacidipiscis_RS01585	HlyC/CorC family transporter
LAC1533_RS02705	protein-tyrosine-phosphatase	GSS_RS05935	protein-tyrosine-phosphatase	Lacidipiscis_RS01580	protein-tyrosine-phosphatase
LAC1533_RS02710	methylated-DNA--[protein]-cysteine S-methyltransferase	GSS_RS05940	methylated-DNA--[protein]-cysteine S-methyltransferase	Lacidipiscis_RS01575	methylated-DNA--[protein]-cysteine S-methyltransferase
LAC1533_RS02715	undecaprenyl-diphosphate phosphatase	GSS_RS05945	undecaprenyl-diphosphate phosphatase	Lacidipiscis_RS01570	undecaprenyl-diphosphate phosphatase
LAC1533_RS02720	phosphopyruvate hydratase	GSS_RS05950	phosphopyruvate hydratase	Lacidipiscis_RS01565	phosphopyruvate hydratase
LAC1533_RS02725	hypothetical protein			Lacidipiscis_RS08200	hypothetical protein
LAC1533_RS02730	alpha-galactosidase	GSS_RS05955	alpha-galactosidase	Lacidipiscis_RS10520	alpha-galactosidase
LAC1533_RS02735	hypothetical protein	GSS_RS05960	hypothetical protein	Lacidipiscis_RS10515	hypothetical protein
LAC1533_RS02740	hypothetical protein	GSS_RS05965	hypothetical protein	Lacidipiscis_RS10510	hypothetical protein
LAC1533_RS02745	threonine/serine exporter	GSS_RS05970	threonine/serine exporter	Lacidipiscis_RS10505	threonine/serine exporter
LAC1533_RS02750	threonine/serine exporter	GSS_RS05975	threonine/serine exporter	Lacidipiscis_RS10500	threonine/serine exporter
LAC1533_RS02760	glutamyl-tRNA amidotransferase subunit A	GSS_RS05985	glutamyl-tRNA amidotransferase subunit A	Lacidipiscis_RS10490	glutamyl-tRNA amidotransferase
LAC1533_RS02765	nucleoside-diphosphate kinase	GSS_RS05990	nucleoside-diphosphate kinase	Lacidipiscis_RS10485	nucleoside-diphosphate kinase
LAC1533_RS02770 IDENTICAL PARALOGS LAC1533_RS06930 IDENTICAL PARALOGS LAC1533_RS07625 IDENTICAL PARALOGS LAC1533_RS09480 IDENTICAL PARALOGS LAC1533_RS11780	IS982 family transposase
LAC1533_RS02775	(deoxy)nucleoside triphosphate pyrophosphohydrolase	GSS_RS05995	(deoxy)nucleoside triphosphate pyrophosphohydrolase	Lacidipiscis_RS10480	(deoxy)nucleoside triphosphate pyrophosphohydrolase
LAC1533_RS02780	DUF3427 domain-containing protein	GSS_RS06000	DUF3427 domain-containing protein	Lacidipiscis_RS10475	DUF3427 domain-containing protein
LAC1533_RS02785	IMP dehydrogenase	GSS_RS06005	IMP dehydrogenase	Lacidipiscis_RS10470	IMP dehydrogenase
LAC1533_RS02790	large-conductance mechanosensitive channel protein MscL	GSS_RS06010	large-conductance mechanosensitive channel protein MscL	Lacidipiscis_RS10465	large-conductance mechanosensitive channel protein MscL
LAC1533_RS02795 IDENTICAL PARALOGS LAC1533_RS03115 IDENTICAL PARALOGS LAC1533_RS04380 IDENTICAL PARALOGS LAC1533_RS07245 IDENTICAL PARALOGS LAC1533_RS10090 IDENTICAL PARALOGS LAC1533_RS10270 IDENTICAL PARALOGS LAC1533_RS10445	IS30 family transposase
LAC1533_RS02800	nitroreductase	GSS_RS06015	nitroreductase	Lacidipiscis_RS10460	nitroreductase
LAC1533_RS02805	LysM domain-containing protein	GSS_RS06020	LysM domain-containing protein	Lacidipiscis_RS10455	LysM domain-containing protein
LAC1533_RS02810	glyoxalase	GSS_RS06025	glyoxalase	Lacidipiscis_RS10450	glyoxalase
LAC1533_RS02815	hypothetical protein	GSS_RS06030	hypothetical protein	Lacidipiscis_RS10445	hypothetical protein
LAC1533_RS02820	UDP-glucose 4-epimerase GalE	GSS_RS06035	UDP-glucose 4-epimerase GalE	Lacidipiscis_RS10440	UDP-glucose 4-epimerase GalE
LAC1533_RS02825	hypothetical protein	GSS_RS06040	hypothetical protein	Lacidipiscis_RS10435	hypothetical protein
LAC1533_RS02830	hypothetical protein	GSS_RS06045	hypothetical protein	Lacidipiscis_RS10430	hypothetical protein
LAC1533_RS02835	galactose mutarotase	GSS_RS06050	galactose mutarotase	Lacidipiscis_RS10425	galactose mutarotase
LAC1533_RS02840	HAD family hydrolase	GSS_RS06055	HAD family hydrolase	Lacidipiscis_RS03205	HAD family hydrolase
LAC1533_RS02845	AI-2E family transporter	GSS_RS06060	AI-2E family transporter	Lacidipiscis_RS03200	AI-2E family transporter
LAC1533_RS02850	pyridoxal phosphate-dependent aminotransferase	GSS_RS06065	pyridoxal phosphate-dependent aminotransferase	Lacidipiscis_RS03195	pyridoxal phosphate-dependent aminotransferase
LAC1533_RS02855	2,3-diphosphoglycerate-dependent phosphoglycerate mutase	GSS_RS06070	2,3-diphosphoglycerate-dependent phosphoglycerate mutase	Lacidipiscis_RS03190	2,3-diphosphoglycerate-dependent phosphoglycerate mutase
LAC1533_RS02870	hypothetical protein	GSS_RS12705	hypothetical protein	Lacidipiscis_RS05340	hypothetical protein
LAC1533_RS02885	DNA starvation/stationary phase protection protein	GSS_RS06205	DNA starvation/stationary phase protection protein	Lacidipiscis_RS05355	DNA starvation/stationary phase protection protein
LAC1533_RS02890	hypothetical protein			Lacidipiscis_RS05360	hypothetical protein
LAC1533_RS02900	Crp/Fnr family transcriptional regulator	GSS_RS06220	Crp/Fnr family transcriptional regulator	Lacidipiscis_RS05370	Crp/Fnr family transcriptional regulator
LAC1533_RS02905	copper chaperone	GSS_RS06225	copper chaperone	Lacidipiscis_RS05375	copper chaperone
LAC1533_RS02910	DNA starvation/stationary phase protection protein	GSS_RS06230	DNA starvation/stationary phase protection protein	Lacidipiscis_RS05380	DNA starvation/stationary phase protection protein
LAC1533_RS02915	metal-sensitive transcriptional regulator	GSS_RS06240	metal-sensitive transcriptional regulator	Lacidipiscis_RS05385	metal-sensitive transcriptional regulator
LAC1533_RS02920	thioredoxin	GSS_RS06245	thioredoxin	Lacidipiscis_RS05390	thioredoxin
LAC1533_RS02925	aquaporin family protein	GSS_RS06250	aquaporin family protein	Lacidipiscis_RS05395	aquaporin family protein
LAC1533_RS02930	transposase
LAC1533_RS02935	copper-translocating P-type ATPase			Lacidipiscis_RS05400	copper-translocating P-type ATPase
LAC1533_RS02940	hypothetical protein	GSS_RS14075	hypothetical protein	Lacidipiscis_RS05405	hypothetical protein
LAC1533_RS02945	hypothetical protein	GSS_RS06265	hypothetical protein	Lacidipiscis_RS05410	hypothetical protein
LAC1533_RS02950 IDENTICAL PARALOGS LAC1533_RS04120	IS1380 family transposase
LAC1533_RS02955	MarR family transcriptional regulator	GSS_RS06280	MarR family transcriptional regulator	Lacidipiscis_RS05415	MarR family transcriptional regulator
LAC1533_RS02960	hypothetical protein
LAC1533_RS02970	hypothetical protein
LAC1533_RS02975	IS30 family transposase
LAC1533_RS02980	bifunctional lysylphosphatidylglycerol flippase/synthetase MprF			Lacidipiscis_RS05430	bifunctional lysylphosphatidylglycerol flippase/synthetase MprF
LAC1533_RS02985	tRNA-dihydrouridine synthase	GSS_RS06305	tRNA-dihydrouridine synthase	Lacidipiscis_RS05435	tRNA-dihydrouridine synthase
LAC1533_RS02990	hypothetical protein	GSS_RS06310	hypothetical protein	Lacidipiscis_RS05440	hypothetical protein
LAC1533_RS02995	succinyl-diaminopimelate desuccinylase	GSS_RS06315	succinyl-diaminopimelate desuccinylase	Lacidipiscis_RS05445	succinyl-diaminopimelate desuccinylase
LAC1533_RS03000	DUF554 domain-containing protein	GSS_RS06320	DUF554 domain-containing protein	Lacidipiscis_RS05450	DUF554 domain-containing protein
LAC1533_RS03005	flavodoxin family protein	GSS_RS06325	flavodoxin family protein	Lacidipiscis_RS05455	flavodoxin family protein
LAC1533_RS03010	DUF4767 domain-containing protein	GSS_RS12740	DUF4767 domain-containing protein	Lacidipiscis_RS05460	DUF4767 domain-containing protein
LAC1533_RS03015	hypothetical protein	GSS_RS06335	hypothetical protein	Lacidipiscis_RS05465	hypothetical protein
LAC1533_RS03020	hypothetical protein	GSS_RS06340	hypothetical protein	Lacidipiscis_RS05470	hypothetical protein
LAC1533_RS03025	RluA family pseudouridine synthase	GSS_RS06350	RluA family pseudouridine synthase	Lacidipiscis_RS05475	RluA family pseudouridine synthase
LAC1533_RS03030	DUF3114 domain-containing protein	GSS_RS12745	DUF3114 domain-containing protein	Lacidipiscis_RS05480	DUF3114 domain-containing protein
LAC1533_RS03035	hypothetical protein	GSS_RS06360	hypothetical protein	Lacidipiscis_RS05485	hypothetical protein
LAC1533_RS03040	OsmC family peroxiredoxin	GSS_RS06365	OsmC family peroxiredoxin	Lacidipiscis_RS05490	OsmC family peroxiredoxin
LAC1533_RS03045	YitT family protein	GSS_RS06370	YitT family protein	Lacidipiscis_RS05495	YitT family protein
LAC1533_RS03050	phosphoketolase family protein	GSS_RS06375	phosphoketolase family protein	Lacidipiscis_RS05500	phosphoketolase family protein
LAC1533_RS03055	hypothetical protein	GSS_RS06380	hypothetical protein	Lacidipiscis_RS05505	hypothetical protein
LAC1533_RS03060	NERD domain-containing protein	GSS_RS06390	NERD domain-containing protein	Lacidipiscis_RS05510	NERD domain-containing protein
LAC1533_RS03065	RNA methylase	GSS_RS06395	RNA methylase	Lacidipiscis_RS05515	RNA methylase
LAC1533_RS03070	YfcC family protein	GSS_RS06400	YfcC family protein	Lacidipiscis_RS05520	YfcC family protein
LAC1533_RS03075	acetylornithine deacetylase	GSS_RS06405	acetylornithine deacetylase	Lacidipiscis_RS05525	acetylornithine deacetylase
LAC1533_RS03080	LemA family protein	GSS_RS06415	LemA family protein	Lacidipiscis_RS05530	LemA family protein
LAC1533_RS03085	heat-shock protein HtpX	GSS_RS06420	heat-shock protein HtpX	Lacidipiscis_RS05535	heat-shock protein HtpX
LAC1533_RS03105	DUF871 domain-containing protein	GSS_RS09780	DUF871 domain-containing protein	Lacidipiscis_RS00850	DUF871 domain-containing protein
LAC1533_RS03110	deoxyribonuclease	GSS_RS09785	deoxyribonuclease	Lacidipiscis_RS00845	deoxyribonuclease
LAC1533_RS03120	TetR/AcrR family transcriptional regulator	GSS_RS13830	TetR/AcrR family transcriptional regulator	Lacidipiscis_RS00840	TetR/AcrR family transcriptional regulator
LAC1533_RS03130	ABC transporter ATP-binding protein	GSS_RS09805	ABC transporter ATP-binding protein	Lacidipiscis_RS00830	ABC transporter ATP-binding protein
LAC1533_RS03135	hypothetical protein	GSS_RS13835	hypothetical protein	Lacidipiscis_RS00825	hypothetical protein
LAC1533_RS03140	glycosyltransferase family 8 protein	GSS_RS09825	glycosyltransferase family 8 protein	Lacidipiscis_RS09505	glycosyltransferase family 8 protein
LAC1533_RS03145	deoxyribose-phosphate aldolase	GSS_RS13210	deoxyribose-phosphate aldolase	Lacidipiscis_RS09500	deoxyribose-phosphate aldolase
LAC1533_RS03155	hypothetical protein
LAC1533_RS03160	IS982 family transposase	GSS_RS11505	transposase	Lacidipiscis_RS05855	IS982 family transposase
LAC1533_RS03165	IS982 family transposase			Lacidipiscis_RS06900 IDENTICAL PARALOGS Lacidipiscis_RS03210	IS982 family transposase
LAC1533_RS03170	hypothetical protein	GSS_RS13845	hypothetical protein
LAC1533_RS03175	galactose mutarotase	GSS_RS13850	galactose mutarotase
LAC1533_RS03180	hypothetical protein	GSS_RS09840	hypothetical protein
LAC1533_RS03190	PEP phosphonomutase	GSS_RS09850	PEP phosphonomutase
LAC1533_RS03195	hypothetical protein	GSS_RS09855	hypothetical protein	Lacidipiscis_RS00010	hypothetical protein
LAC1533_RS03200	NADH-dependent alcohol dehydrogenase	GSS_RS09865	NADH-dependent alcohol dehydrogenase	Lacidipiscis_RS00005	NADH-dependent alcohol dehydrogenase
LAC1533_RS03205	HAD family phosphatase	GSS_RS09870	HAD family phosphatase	Lacidipiscis_RS11990	HAD family phosphatase
LAC1533_RS03220	energy-coupling factor transporter transmembrane protein EcfT	GSS_RS09885	energy-coupling factor transporter transmembrane protein EcfT	Lacidipiscis_RS11975	energy-coupling factor transporter transmembrane protein EcfT
LAC1533_RS03225	LysM peptidoglycan-binding domain-containing protein	GSS_RS09890	LysM domain-containing protein	Lacidipiscis_RS11970	LysM peptidoglycan-binding domain-containing protein
LAC1533_RS03230	tRNA epoxyqueuosine(34) reductase QueG	GSS_RS09895	tRNA epoxyqueuosine(34) reductase QueG	Lacidipiscis_RS13315	tRNA epoxyqueuosine(34) reductase QueG
LAC1533_RS03235	DUF4430 domain-containing protein	GSS_RS09900	DUF4430 domain-containing protein	Lacidipiscis_RS13310	DUF4430 domain-containing protein
LAC1533_RS03240	deoxynucleoside kinase	GSS_RS09905	deoxyadenosine kinase	Lacidipiscis_RS13305	deoxyadenosine kinase
LAC1533_RS03245	DUF1440 domain-containing protein	GSS_RS09910	DUF1440 domain-containing protein	Lacidipiscis_RS13300	DUF1440 domain-containing protein
LAC1533_RS03250	MFS transporter	GSS_RS09915	sodium:solute symporter	Lacidipiscis_RS13295	sodium:solute symporter
LAC1533_RS03255	linear amide C-N hydrolase	GSS_RS09920	linear amide C-N hydrolase	Lacidipiscis_RS13290	linear amide C-N hydrolase
LAC1533_RS03260	KR domain-containing protein	GSS_RS09925	KR domain-containing protein
LAC1533_RS03265	NAD(P)/FAD-dependent oxidoreductase	GSS_RS09930	NAD(P)/FAD-dependent oxidoreductase
LAC1533_RS03275	maturase
LAC1533_RS03285	hypothetical protein
LAC1533_RS03295	cytochrome ubiquinol oxidase subunit I	GSS_RS09935	cytochrome ubiquinol oxidase subunit I	Lacidipiscis_RS04955	cytochrome ubiquinol oxidase subunit I
LAC1533_RS03300	cytochrome d ubiquinol oxidase subunit II	GSS_RS09940	cytochrome d ubiquinol oxidase subunit II	Lacidipiscis_RS04950	cytochrome d ubiquinol oxidase subunit II
LAC1533_RS03305	thiol reductant ABC exporter subunit CydD	GSS_RS09945	thiol reductant ABC exporter subunit CydD	Lacidipiscis_RS04945	thiol reductant ABC exporter subunit CydD
LAC1533_RS03310	thiol reductant ABC exporter subunit CydC	GSS_RS09950	thiol reductant ABC exporter subunit CydC	Lacidipiscis_RS04940	thiol reductant ABC exporter subunit CydC
LAC1533_RS03315	polyprenyl diphosphate synthase			Lacidipiscis_RS04935	polyprenyl diphosphate synthase
LAC1533_RS03325	prenyltransferase	GSS_RS09960	1,4-dihydroxy-2-naphthoate polyprenyltransferase	Lacidipiscis_RS04930	1,4-dihydroxy-2-naphthoate polyprenyltransferase
LAC1533_RS03330	NAD(P)/FAD-dependent oxidoreductase	GSS_RS09965	NAD(P)/FAD-dependent oxidoreductase	Lacidipiscis_RS04925	NAD(P)/FAD-dependent oxidoreductase
LAC1533_RS03335	D-2-hydroxyacid dehydrogenase	GSS_RS09970	D-2-hydroxyacid dehydrogenase	Lacidipiscis_RS04920	hydroxyacid dehydrogenase
LAC1533_RS03340	metal-dependent hydrolase	GSS_RS09975	metal-dependent hydrolase	Lacidipiscis_RS04915	metal-dependent hydrolase
LAC1533_RS03345	MFS transporter	GSS_RS09980	MFS transporter
LAC1533_RS03350	hypothetical protein	GSS_RS09985	hypothetical protein	Lacidipiscis_RS04905	hypothetical protein
LAC1533_RS03355	peroxidase	GSS_RS09990	peroxidase	Lacidipiscis_RS04900	peroxidase
LAC1533_RS03360	iron-sulfur cluster biosynthesis family protein	GSS_RS09995	iron-sulfur cluster biosynthesis family protein	Lacidipiscis_RS04895	iron-sulfur cluster biosynthesis family protein
LAC1533_RS03365	PLP-dependent aminotransferase family protein	GSS_RS10000	PLP-dependent aminotransferase family protein	Lacidipiscis_RS04890	PLP-dependent aminotransferase family protein
LAC1533_RS03375 IDENTICAL PARALOGS LAC1533_RS10285	group II intron reverse transcriptase/maturase
LAC1533_RS03380	CBS domain-containing protein	GSS_RS10005	CBS domain-containing protein	Lacidipiscis_RS04870	CBS domain-containing protein
LAC1533_RS03385	ABC transporter permease	GSS_RS10010	ABC transporter permease	Lacidipiscis_RS04865	ABC transporter permease
LAC1533_RS03390	osmoprotectant ABC transporter substrate-binding protein	GSS_RS10015	osmoprotectant ABC transporter substrate-binding protein	Lacidipiscis_RS04860	osmoprotectant ABC transporter substrate-binding protein
LAC1533_RS03395	ABC transporter permease	GSS_RS10020	ABC transporter permease	Lacidipiscis_RS04855	ABC transporter permease
LAC1533_RS03400	glycosyltransferase family 8 protein	GSS_RS10025	glycosyltransferase family 8 protein	Lacidipiscis_RS04850	glycosyltransferase family 8 protein
LAC1533_RS03405	hypothetical protein	GSS_RS10030	hypothetical protein	Lacidipiscis_RS04845	SAM-dependent methyltransferase
LAC1533_RS03410 IDENTICAL PARALOGS LAC1533_RS04045 IDENTICAL PARALOGS LAC1533_RS04795 IDENTICAL PARALOGS LAC1533_RS06715 IDENTICAL PARALOGS LAC1533_RS07615 IDENTICAL PARALOGS LAC1533_RS11290	IS256 family transposase			Lacidipiscis_RS06475	IS256 family transposase
LAC1533_RS03415	DNA-binding response regulator	GSS_RS10585	DNA-binding response regulator	Lacidipiscis_RS01890	DNA-binding response regulator
LAC1533_RS03420	sensor histidine kinase	GSS_RS10590	sensor histidine kinase	Lacidipiscis_RS01895	sensor histidine kinase
LAC1533_RS03425	D-alanyl-D-alanine carboxypeptidase	GSS_RS10595	D-alanyl-D-alanine carboxypeptidase	Lacidipiscis_RS01900	D-alanyl-D-alanine carboxypeptidase
LAC1533_RS03430	branched-chain amino acid ABC transporter permease	GSS_RS10600	branched-chain amino acid ABC transporter permease	Lacidipiscis_RS01905	branched-chain amino acid ABC transporter permease
LAC1533_RS03435	AzlD domain-containing protein	GSS_RS10605	AzlD domain-containing protein	Lacidipiscis_RS01910	AzlD domain-containing protein
LAC1533_RS03440	alpha/beta hydrolase	GSS_RS10610	alpha/beta hydrolase	Lacidipiscis_RS06445	alpha/beta hydrolase
LAC1533_RS03445	PAP2 family protein	GSS_RS10615	PAP2 family protein
LAC1533_RS03450	hypothetical protein	GSS_RS10620	hypothetical protein	Lacidipiscis_RS09190	hypothetical protein
LAC1533_RS03455	RluA family pseudouridine synthase	GSS_RS10625	RluA family pseudouridine synthase	Lacidipiscis_RS09195	RluA family pseudouridine synthase
LAC1533_RS03460	metal-dependent transcriptional regulator	GSS_RS10630	metal-dependent transcriptional regulator	Lacidipiscis_RS09200	metal-dependent transcriptional regulator
LAC1533_RS03465	cold-shock protein	GSS_RS10635	cold-shock protein	Lacidipiscis_RS09205	cold-shock protein
LAC1533_RS03475	LytR family transcriptional regulator	GSS_RS10640	LytR family transcriptional regulator	Lacidipiscis_RS09210	LytR family transcriptional regulator
LAC1533_RS03485	DUF805 domain-containing protein	GSS_RS10650	DUF805 domain-containing protein	Lacidipiscis_RS09215	DUF805 domain-containing protein
LAC1533_RS03490	N-acetyltransferase	GSS_RS13320	N-acetyltransferase	Lacidipiscis_RS09220	N-acetyltransferase
LAC1533_RS03495	Rrf2 family transcriptional regulator	GSS_RS10660	Rrf2 family transcriptional regulator	Lacidipiscis_RS09225	Rrf2 family transcriptional regulator
LAC1533_RS03500	acetolactate synthase AlsS	GSS_RS10665	acetolactate synthase AlsS	Lacidipiscis_RS09230	acetolactate synthase AlsS
LAC1533_RS03505	acetolactate decarboxylase	GSS_RS10670	acetolactate decarboxylase	Lacidipiscis_RS09235	acetolactate decarboxylase
LAC1533_RS03510	amino acid permease	GSS_RS10675	amino acid permease	Lacidipiscis_RS09240	amino acid permease
LAC1533_RS03515	serine--tRNA ligase	GSS_RS10680	serine--tRNA ligase	Lacidipiscis_RS09245	serine--tRNA ligase
LAC1533_RS03545	sigma-70 family RNA polymerase sigma factor	GSS_RS04840	sigma-70 family RNA polymerase sigma factor	Lacidipiscis_RS05315	sigma-70 family RNA polymerase sigma factor
LAC1533_RS03560	ATP-dependent DNA helicase	GSS_RS04850	ATP-dependent DNA helicase	Lacidipiscis_RS06410	ATP-dependent DNA helicase
LAC1533_RS03565	tryptophan--tRNA ligase	GSS_RS04855	tryptophan--tRNA ligase	Lacidipiscis_RS06405	tryptophan--tRNA ligase
LAC1533_RS03570	Ppx/GppA family phosphatase	GSS_RS04860	Ppx/GppA family phosphatase	Lacidipiscis_RS06400	exopolyphosphatase
LAC1533_RS03580	hypothetical protein	GSS_RS10285	hypothetical protein	Lacidipiscis_RS06395	hypothetical protein
LAC1533_RS03585	hydroxymethylglutaryl-CoA reductase, degradative	GSS_RS10290	hydroxymethylglutaryl-CoA reductase, degradative	Lacidipiscis_RS06390	hydroxymethylglutaryl-CoA reductase, degradative
LAC1533_RS03590	hypothetical protein	GSS_RS10295	hypothetical protein	Lacidipiscis_RS06385	hypothetical protein
LAC1533_RS03595	NAD-dependent protein deacylase	GSS_RS10300	NAD-dependent protein deacylase	Lacidipiscis_RS06380	NAD-dependent protein deacylase
LAC1533_RS03600	methionine--tRNA ligase	GSS_RS10305	methionine--tRNA ligase	Lacidipiscis_RS06375	methionine--tRNA ligase
LAC1533_RS03605	TatD family deoxyribonuclease	GSS_RS10310	TatD family deoxyribonuclease	Lacidipiscis_RS06370	TatD family deoxyribonuclease
LAC1533_RS03610	ribonuclease M5	GSS_RS10315	ribonuclease M5	Lacidipiscis_RS06365	ribonuclease M5
LAC1533_RS03615	16S rRNA (adenine(1518)-N(6)/adenine(1519)-N(6))- dimethyltransferase RsmA			Lacidipiscis_RS06360	16S rRNA (adenine(1518)-N(6)/adenine(1519)-N(6))- dimethyltransferase RsmA
LAC1533_RS03620	hypothetical protein	GSS_RS10325	hypothetical protein	Lacidipiscis_RS06355	hypothetical protein
LAC1533_RS03625	4-(cytidine 5-diphospho)-2-C-methyl-D-erythritol kinase			Lacidipiscis_RS06350	4-(cytidine 5-diphospho)-2-C-methyl-D-erythritol kinase
LAC1533_RS03630	pur operon repressor	GSS_RS10335	pur operon repressor	Lacidipiscis_RS06345	pur operon repressor
LAC1533_RS03635	XRE family transcriptional regulator	GSS_RS10340	XRE family transcriptional regulator	Lacidipiscis_RS06340	XRE family transcriptional regulator
LAC1533_RS03640	bifunctional UDP-N-acetylglucosamine diphosphorylase/glucosamine-1-phosphate N-acetyltransferase GlmU	GSS_RS10345	bifunctional UDP-N-acetylglucosamine diphosphorylase/glucosamine-1-phosphate N-acetyltransferase GlmU	Lacidipiscis_RS08340	bifunctional UDP-N-acetylglucosamine diphosphorylase/glucosamine-1-phosphate N-acetyltransferase GlmU
LAC1533_RS03645	ribose-phosphate pyrophosphokinase	GSS_RS10350	ribose-phosphate pyrophosphokinase	Lacidipiscis_RS08335	ribose-phosphate pyrophosphokinase
LAC1533_RS03650	hypothetical protein	GSS_RS10355	hypothetical protein	Lacidipiscis_RS08330	hypothetical protein
LAC1533_RS03655	biotin--[acetyl-CoA-carboxylase] ligase	GSS_RS10360	biotin--[acetyl-CoA-carboxylase] ligase	Lacidipiscis_RS08325	biotin--[acetyl-CoA-carboxylase] ligase
LAC1533_RS03660	YibE/F family protein			Lacidipiscis_RS09445	YibE/F family protein
LAC1533_RS03665	YibE/F family protein	GSS_RS10370	YibE/F family protein	Lacidipiscis_RS09440	YibE/F family protein
LAC1533_RS03670	hypothetical protein	GSS_RS13295	hypothetical protein	Lacidipiscis_RS09435	hypothetical protein
LAC1533_RS03675	HD domain-containing protein	GSS_RS10385	HD domain-containing protein	Lacidipiscis_RS11385	HD domain-containing protein
LAC1533_RS03680	DUF1934 domain-containing protein	GSS_RS10395	DUF1934 domain-containing protein	Lacidipiscis_RS11380	DUF1934 domain-containing protein
LAC1533_RS03685	DNA-directed RNA polymerase subunit delta	GSS_RS10400	DNA-directed RNA polymerase subunit delta	Lacidipiscis_RS11375	DNA-directed RNA polymerase subunit delta
LAC1533_RS03690	CTP synthase	GSS_RS10405	CTP synthase	Lacidipiscis_RS11370	CTP synthase
LAC1533_RS03700	group II intron reverse transcriptase/maturase
LAC1533_RS03710	hypothetical protein	GSS_RS10830	hypothetical protein	Lacidipiscis_RS11365	hypothetical protein
LAC1533_RS03715	UDP-N-acetylglucosamine 1-carboxyvinyltransferase			Lacidipiscis_RS11360	UDP-N-acetylglucosamine 1-carboxyvinyltransferase
LAC1533_RS03720	transcription termination factor Rho	GSS_RS10840	transcription termination factor Rho	Lacidipiscis_RS11355	transcription termination factor Rho
LAC1533_RS03725	type B 50S ribosomal protein L31	GSS_RS10845	type B 50S ribosomal protein L31	Lacidipiscis_RS11350	type B 50S ribosomal protein L31
LAC1533_RS03730	hypothetical protein	GSS_RS10850	hypothetical protein	Lacidipiscis_RS13320	hypothetical protein
LAC1533_RS03735	ATP-dependent DNA helicase	GSS_RS10855	ATP-dependent DNA helicase	Lacidipiscis_RS09425	hypothetical protein
LAC1533_RS03740	NCS2 family permease	GSS_RS10860	NCS2 family permease	Lacidipiscis_RS09420	NCS2 family permease
LAC1533_RS03745	dihydrofolate reductase	GSS_RS10865	dihydrofolate reductase	Lacidipiscis_RS09415	dihydrofolate reductase
LAC1533_RS03750	TIGR02452 family protein	GSS_RS10870	TIGR02452 family protein	Lacidipiscis_RS09410	TIGR02452 family protein
LAC1533_RS03755	N-acetyltransferase	GSS_RS10880	N-acetyltransferase	Lacidipiscis_RS09405	N-acetyltransferase
LAC1533_RS03760	UDP-N-acetylmuramoyl-tripeptide--D-alanyl-D- alanine ligase	GSS_RS10885	UDP-N-acetylmuramoyl-tripeptide--D-alanyl-D- alanine ligase	Lacidipiscis_RS09400	UDP-N-acetylmuramoyl-tripeptide--D-alanyl-D- alanine ligase
LAC1533_RS03765	ATP-dependent helicase	GSS_RS10890	ATP-dependent helicase	Lacidipiscis_RS09395	ATP-dependent helicase
LAC1533_RS03770	transposase
LAC1533_RS03780	maturase
LAC1533_RS03785	IS5-like element ISLpl3 family transposase			Lacidipiscis_RS07020	hypothetical protein
LAC1533_RS03795	holo-ACP synthase	GSS_RS10770	holo-ACP synthase	Lacidipiscis_RS03865	holo-ACP synthase
LAC1533_RS03800	alanine racemase	GSS_RS10765	alanine racemase	Lacidipiscis_RS03870	alanine racemase
LAC1533_RS03805	hypothetical protein	GSS_RS10760	hypothetical protein	Lacidipiscis_RS03875	hypothetical protein
LAC1533_RS03810	type II toxin-antitoxin system PemK/MazF family toxin	GSS_RS10755	type II toxin-antitoxin system PemK/MazF family toxin	Lacidipiscis_RS03880	type II toxin-antitoxin system PemK/MazF family toxin
LAC1533_RS03815	hypothetical protein	GSS_RS10750	hypothetical protein	Lacidipiscis_RS03885	hypothetical protein
LAC1533_RS03820	CBS domain-containing protein	GSS_RS10745	CBS domain-containing protein	Lacidipiscis_RS12660	CBS domain-containing protein
LAC1533_RS03825	L-lactate dehydrogenase	GSS_RS10740	L-lactate dehydrogenase	Lacidipiscis_RS04305	L-lactate dehydrogenase
LAC1533_RS03830	aminoacyl-tRNA hydrolase	GSS_RS10735	aminoacyl-tRNA hydrolase	Lacidipiscis_RS04310	aminoacyl-tRNA hydrolase
LAC1533_RS03835	transcription-repair coupling factor	GSS_RS10730	transcription-repair coupling factor	Lacidipiscis_RS04315	transcription-repair coupling factor
LAC1533_RS03840	sugar transporter	GSS_RS10725	PST polysaccharide transporter	Lacidipiscis_RS04320	sugar transporter
LAC1533_RS03845	RNA-binding S4 domain-containing protein	GSS_RS10720	RNA-binding S4 domain-containing protein	Lacidipiscis_RS04325	RNA-binding S4 domain-containing protein
LAC1533_RS03850	septum formation initiator family protein	GSS_RS10715	septum formation initiator family protein	Lacidipiscis_RS05555	septum formation initiator family protein
LAC1533_RS03855	RNA-binding protein S1	GSS_RS10710	S1 RNA-binding domain containing protein	Lacidipiscis_RS05560	RNA-binding protein S1
LAC1533_RS03860	tRNA lysidine(34) synthetase TilS	GSS_RS13870	hypothetical protein	Lacidipiscis_RS05565	tRNA lysidine(34) synthetase TilS
LAC1533_RS03865	hypoxanthine phosphoribosyltransferase	GSS_RS10700	hypoxanthine phosphoribosyltransferase	Lacidipiscis_RS05570	hypoxanthine phosphoribosyltransferase
LAC1533_RS03870	ATP-dependent metallopeptidase FtsH/Yme1/Tma family protein	GSS_RS10695	ATP-dependent metallopeptidase FtsH/Yme1/Tma family protein	Lacidipiscis_RS05575	ATP-dependent metallopeptidase FtsH/Yme1/Tma family protein
LAC1533_RS03875	Hsp33 family molecular chaperone HslO	GSS_RS10690	Hsp33 family molecular chaperone HslO	Lacidipiscis_RS05580	Hsp33 family molecular chaperone HslO
LAC1533_RS03880	lysine--tRNA ligase	GSS_RS10685	lysine--tRNA ligase	Lacidipiscis_RS05585	lysine--tRNA ligase
LAC1533_RS03920	peptide MFS transporter	GSS_RS07250	peptide MFS transporter	Lacidipiscis_RS00675	peptide MFS transporter
LAC1533_RS03935	pyrroline-5-carboxylate reductase	GSS_RS07265	pyrroline-5-carboxylate reductase	Lacidipiscis_RS00690	pyrroline-5-carboxylate reductase
LAC1533_RS03940	N-acetylglucosamine-6-phosphate deacetylase	GSS_RS07270	N-acetylglucosamine-6-phosphate deacetylase	Lacidipiscis_RS00695	N-acetylglucosamine-6-phosphate deacetylase
LAC1533_RS03945	GntR family transcriptional regulator	GSS_RS07275	GntR family transcriptional regulator	Lacidipiscis_RS00700	GntR family transcriptional regulator
LAC1533_RS03950	class 1b ribonucleoside-diphosphate reductase subunit beta	GSS_RS07280	class 1b ribonucleoside-diphosphate reductase subunit beta	Lacidipiscis_RS06780	class 1b ribonucleoside-diphosphate reductase subunit beta
LAC1533_RS03955	class 1b ribonucleoside-diphosphate reductase subunit alpha	GSS_RS12850	class 1b ribonucleoside-diphosphate reductase subunit alpha	Lacidipiscis_RS06775	class 1b ribonucleoside-diphosphate reductase subunit alpha
LAC1533_RS03960	class Ib ribonucleoside-diphosphate reductase assembly flavoprotein NrdI	GSS_RS07300	class Ib ribonucleoside-diphosphate reductase assembly flavoprotein NrdI	Lacidipiscis_RS06770	class Ib ribonucleoside-diphosphate reductase assembly flavoprotein NrdI
LAC1533_RS03965	glutaredoxin-like protein NrdH	GSS_RS07305	glutaredoxin-like protein NrdH	Lacidipiscis_RS06765	glutaredoxin-like protein NrdH
LAC1533_RS03970	class I SAM-dependent methyltransferase	GSS_RS07310	class I SAM-dependent methyltransferase	Lacidipiscis_RS06760	class I SAM-dependent methyltransferase
LAC1533_RS03975	nucleoside deaminase	GSS_RS07315	nucleoside deaminase	Lacidipiscis_RS06755	nucleoside deaminase
LAC1533_RS03985	DNA polymerase III subunit gamma/tau	GSS_RS07320	DNA polymerase III subunit gamma/tau	Lacidipiscis_RS06745	DNA polymerase III subunit gamma/tau
LAC1533_RS03990	YbaB/EbfC family nucleoid-associated protein	GSS_RS07325	nucleoid-associated protein, YbaB/EbfC family	Lacidipiscis_RS06740	nucleoid-associated protein, YbaB/EbfC family
LAC1533_RS03995	recombination protein RecR	GSS_RS07330	recombination protein RecR	Lacidipiscis_RS06735	recombination protein RecR
LAC1533_RS04000	DUF2508 domain-containing protein	GSS_RS07335	DUF2508 domain-containing protein	Lacidipiscis_RS06730	DUF2508 domain-containing protein
LAC1533_RS04005	dTMP kinase			Lacidipiscis_RS06725	dTMP kinase
LAC1533_RS04010	hypothetical protein	GSS_RS07345	hypothetical protein	Lacidipiscis_RS06720	hypothetical protein
LAC1533_RS04015	DNA polymerase III subunit delta	GSS_RS07350	DNA polymerase III subunit delta	Lacidipiscis_RS06715	DNA polymerase III subunit delta
LAC1533_RS04020	DUF972 domain-containing protein	GSS_RS07355	DUF972 domain-containing protein	Lacidipiscis_RS06710	DUF972 domain-containing protein
LAC1533_RS04025	16S rRNA (cytidine(1402)-2-O)-methyltransferase	GSS_RS07360	16S rRNA (cytidine(1402)-2-O)-methyltransferase	Lacidipiscis_RS06705	16S rRNA (cytidine(1402)-2-O)-methyltransferase
LAC1533_RS04030	acyl-ACP thioesterase	GSS_RS07365	acyl-ACP thioesterase	Lacidipiscis_RS06700	acyl-ACP thioesterase
LAC1533_RS04035	IS30 family transposase
LAC1533_RS04040	asparaginase			Lacidipiscis_RS12555	asparaginase
LAC1533_RS04050	tRNA (adenosine(37)-N6)-threonylcarbamoyltransferase complex dimerization subunit type 1 TsaB	GSS_RS07375	tRNA (adenosine(37)-N6)-threonylcarbamoyltransferase complex dimerization subunit type 1 TsaB	Lacidipiscis_RS08650	tRNA (adenosine(37)-N6)-threonylcarbamoyltransferase complex dimerization subunit type 1 TsaB
LAC1533_RS04055	N-acetyltransferase	GSS_RS07380	N-acetyltransferase	Lacidipiscis_RS08645	N-acetyltransferase
LAC1533_RS04060	tRNA (adenosine(37)-N6)-threonylcarbamoyltransferase complex transferase subunit TsaD	GSS_RS07385	tRNA (adenosine(37)-N6)-threonylcarbamoyltransferase complex transferase subunit TsaD	Lacidipiscis_RS08640	tRNA (adenosine(37)-N6)-threonylcarbamoyltransferase complex transferase subunit TsaD
LAC1533_RS04065	multidrug ABC transporter ATP-binding protein			Lacidipiscis_RS08635	multidrug ABC transporter ATP-binding protein
LAC1533_RS04070	redox-sensing transcriptional repressor Rex	GSS_RS07395	redox-sensing transcriptional repressor Rex	Lacidipiscis_RS08630	redox-sensing transcriptional repressor Rex
LAC1533_RS04085	CPBP family intramembrane metalloprotease	GSS_RS07400	CPBP family intramembrane metalloprotease	Lacidipiscis_RS08625	CPBP family intramembrane metalloprotease
LAC1533_RS04090	co-chaperone GroES	GSS_RS07405	co-chaperone GroES	Lacidipiscis_RS08620	co-chaperone GroES
LAC1533_RS04095	chaperonin GroEL	GSS_RS07410	chaperonin GroEL	Lacidipiscis_RS08615	chaperonin GroEL
LAC1533_RS04100	APC family permease	GSS_RS07415	APC family permease	Lacidipiscis_RS06600	APC family permease
LAC1533_RS04105	YigZ family protein	GSS_RS07420	YigZ family protein	Lacidipiscis_RS06605	YigZ family protein
LAC1533_RS04110	DNA/RNA helicase	GSS_RS07425	DNA/RNA helicase	Lacidipiscis_RS06610	DNA/RNA helicase
LAC1533_RS04115	ComF family protein	GSS_RS07430	ComF family protein	Lacidipiscis_RS06615	ComF family protein
LAC1533_RS04125	ribosome-associated translation inhibitor RaiA	GSS_RS07435	ribosome-associated translation inhibitor RaiA	Lacidipiscis_RS06620	ribosome-associated translation inhibitor RaiA
LAC1533_RS04130	preprotein translocase subunit SecA	GSS_RS07440	preprotein translocase subunit SecA	Lacidipiscis_RS06625	preprotein translocase subunit SecA
LAC1533_RS04135	peptide chain release factor 2	GSS_RS07445	peptide chain release factor 2	Lacidipiscis_RS06630	peptide chain release factor 2
LAC1533_RS04140	cell division ATP-binding protein FtsE	GSS_RS07450	cell division ATP-binding protein FtsE	Lacidipiscis_RS06635	cell division ATP-binding protein FtsE
LAC1533_RS04145	ABC transporter permease	GSS_RS07455	ABC transporter permease	Lacidipiscis_RS06640	ABC transporter permease
LAC1533_RS04150	PDZ domain-containing protein	GSS_RS07460	PDZ domain-containing protein	Lacidipiscis_RS07610	PDZ domain-containing protein
LAC1533_RS04155	DNA-binding response regulator	GSS_RS07465	DNA-binding response regulator	Lacidipiscis_RS07615	DNA-binding response regulator
LAC1533_RS04160	two-component sensor histidine kinase	GSS_RS07470	two-component sensor histidine kinase	Lacidipiscis_RS07620	sensor histidine kinase
LAC1533_RS04165	PspC domain-containing protein	GSS_RS07475	PspC domain-containing protein	Lacidipiscis_RS00020	PspC domain-containing protein
LAC1533_RS04170	phage holin family protein	GSS_RS07480	phage holin family protein	Lacidipiscis_RS00025	phage holin family protein
LAC1533_RS04175	HPr kinase/phosphorylase			Lacidipiscis_RS00030	HPr kinase/phosphorylase
LAC1533_RS04180	prolipoprotein diacylglyceryl transferase	GSS_RS07490	prolipoprotein diacylglyceryl transferase	Lacidipiscis_RS00035	prolipoprotein diacylglyceryl transferase
LAC1533_RS04185	thioredoxin-disulfide reductase	GSS_RS07500	thioredoxin-disulfide reductase	Lacidipiscis_RS00040	thioredoxin-disulfide reductase
LAC1533_RS04190 IDENTICAL PARALOGS LAC1533_RS11050	IS256 family transposase			Lacidipiscis_RS00335	IS256 family transposase
LAC1533_RS04195	phospho-sugar mutase	GSS_RS07505	phospho-sugar mutase	Lacidipiscis_RS00045	phospho-sugar mutase
LAC1533_RS04200	excinuclease ABC subunit UvrB	GSS_RS07510	excinuclease ABC subunit UvrB	Lacidipiscis_RS00050	excinuclease ABC subunit UvrB
LAC1533_RS04205	excinuclease ABC subunit UvrA	GSS_RS07515	excinuclease ABC subunit UvrA	Lacidipiscis_RS00055	excinuclease ABC subunit UvrA
LAC1533_RS04210	S-ribosylhomocysteine lyase	GSS_RS07520	S-ribosylhomocysteine lyase	Lacidipiscis_RS00060	S-ribosylhomocysteine lyase
LAC1533_RS04215	serine dehydratase	GSS_RS12875	L-serine ammonia-lyase beta subunit	Lacidipiscis_RS00065	serine dehydratase
LAC1533_RS04220	L-serine ammonia-lyase, iron-sulfur-dependent, subunit alpha	GSS_RS07530	L-serine ammonia-lyase, iron-sulfur-dependent, subunit alpha	Lacidipiscis_RS00070	L-serine ammonia-lyase, iron-sulfur-dependent, subunit alpha
LAC1533_RS04225	RNase adapter RapZ	GSS_RS07535	RNase adapter RapZ	Lacidipiscis_RS00075	RNase adapter RapZ
LAC1533_RS04230	hypothetical protein	GSS_RS07540	hypothetical protein	Lacidipiscis_RS00080	hypothetical protein
LAC1533_RS04235	DNA-binding protein WhiA	GSS_RS07545	DNA-binding protein WhiA	Lacidipiscis_RS00085	DNA-binding protein WhiA
LAC1533_RS04240	ATP-dependent Clp protease proteolytic subunit	GSS_RS07550	ATP-dependent Clp protease proteolytic subunit	Lacidipiscis_RS00090	ATP-dependent Clp protease proteolytic subunit
LAC1533_RS04250	RNA polymerase sigma-54 factor	GSS_RS07560	RNA polymerase sigma-54 factor	Lacidipiscis_RS05880	RNA polymerase sigma-54 factor
LAC1533_RS04255	SorC family transcriptional regulator	GSS_RS07565	SorC family transcriptional regulator	Lacidipiscis_RS05885	SorC family transcriptional regulator
LAC1533_RS04260	type I glyceraldehyde-3-phosphate dehydrogenase	GSS_RS07570	type I glyceraldehyde-3-phosphate dehydrogenase	Lacidipiscis_RS05890	type I glyceraldehyde-3-phosphate dehydrogenase
LAC1533_RS04265	phosphoglycerate kinase			Lacidipiscis_RS05895	phosphoglycerate kinase
LAC1533_RS04270	triose-phosphate isomerase	GSS_RS07580	triose-phosphate isomerase	Lacidipiscis_RS05900	triose-phosphate isomerase
LAC1533_RS04280 IDENTICAL PARALOGS LAC1533_RS07225 IDENTICAL PARALOGS LAC1533_RS10675	group II intron reverse transcriptase/maturase
LAC1533_RS04290	preprotein translocase subunit SecG	GSS_RS07585	preprotein translocase subunit SecG	Lacidipiscis_RS05905	preprotein translocase subunit SecG
LAC1533_RS04295	ribonuclease R	GSS_RS07595	ribonuclease R	Lacidipiscis_RS05910	ribonuclease R
LAC1533_RS04300	SsrA-binding protein SmpB	GSS_RS07600	SsrA-binding protein SmpB	Lacidipiscis_RS05915	SsrA-binding protein SmpB
LAC1533_RS04310	group II intron reverse transcriptase/maturase			Lacidipiscis_RS03240	group II intron reverse transcriptase/maturase
LAC1533_RS04320	hypothetical protein	GSS_RS07605	hypothetical protein	Lacidipiscis_RS12625	hypothetical protein
LAC1533_RS04325	Cof-type HAD-IIB family hydrolase	GSS_RS07610	Cof-type HAD-IIB family hydrolase	Lacidipiscis_RS12620	Cof-type HAD-IIB family hydrolase
LAC1533_RS04330	uracil-DNA glycosylase	GSS_RS07615	uracil-DNA glycosylase	Lacidipiscis_RS12615	uracil-DNA glycosylase
LAC1533_RS04335	phosphate acetyltransferase	GSS_RS07620	phosphate acetyltransferase	Lacidipiscis_RS12610	phosphate acetyltransferase
LAC1533_RS04340	tRNA (adenosine(37)-N6)-threonylcarbamoyltransferase complex ATPase subunit type 1 TsaE	GSS_RS07625	tRNA (adenosine(37)-N6)-threonylcarbamoyltransferase complex ATPase subunit type 1 TsaE	Lacidipiscis_RS12605	tRNA (adenosine(37)-N6)-threonylcarbamoyltransferase complex ATPase subunit type 1 TsaE
LAC1533_RS04345	exonuclease	GSS_RS07630	exonuclease	Lacidipiscis_RS12600	hypothetical protein
LAC1533_RS04350	UDP-N-acetylmuramate dehydrogenase			Lacidipiscis_RS12595	UDP-N-acetylmuramate dehydrogenase
LAC1533_RS04355	DUF1361 domain-containing protein	GSS_RS07640	DUF1361 domain-containing protein	Lacidipiscis_RS12590	DUF1361 domain-containing protein
LAC1533_RS04360	TIGR00159 family protein	GSS_RS07645	TIGR00159 family protein	Lacidipiscis_RS12585	TIGR00159 family protein
LAC1533_RS04365	hypothetical protein			Lacidipiscis_RS12580	hypothetical protein
LAC1533_RS04370	phosphoglucosamine mutase	GSS_RS07655	phosphoglucosamine mutase	Lacidipiscis_RS12575	phosphoglucosamine mutase
LAC1533_RS04375	hypothetical protein	GSS_RS07660	hypothetical protein	Lacidipiscis_RS12570	hypothetical protein
LAC1533_RS04390	hypothetical protein	GSS_RS07665	hypothetical protein	Lacidipiscis_RS12565	hypothetical protein
LAC1533_RS04395	ABC transporter	GSS_RS07670	ABC transporter	Lacidipiscis_RS09590	ABC transporter
LAC1533_RS04400	phosphate ABC transporter permease subunit PstC	GSS_RS07675	phosphate ABC transporter permease subunit PstC	Lacidipiscis_RS09585	phosphate ABC transporter permease subunit PstC
LAC1533_RS04405	phosphate ABC transporter, permease protein PstA	GSS_RS07680	phosphate ABC transporter, permease protein PstA	Lacidipiscis_RS09580	phosphate ABC transporter, permease protein PstA
LAC1533_RS04410	phosphate ABC transporter ATP-binding protein	GSS_RS07685	phosphate ABC transporter ATP-binding protein	Lacidipiscis_RS09575	phosphate ABC transporter ATP-binding protein
LAC1533_RS04415	phosphate ABC transporter ATP-binding protein	GSS_RS07690	phosphate ABC transporter ATP-binding protein	Lacidipiscis_RS09570	phosphate ABC transporter ATP-binding protein
LAC1533_RS04420	phosphate transport system regulatory protein PhoU	GSS_RS07695	phosphate transport system regulatory protein PhoU	Lacidipiscis_RS09565	phosphate transport system regulatory protein PhoU
LAC1533_RS04425	fructose-1,6-bisphosphate aldolase, class II	GSS_RS07700	fructose-1,6-bisphosphate aldolase, class II	Lacidipiscis_RS09560	fructose-1,6-bisphosphate aldolase, class II
LAC1533_RS04430	IS1182 family transposase	GSS_RS07705	IS1182 family transposase	Lacidipiscis_RS09555	IS5/IS1182 family transposase
LAC1533_RS04440	DUF1836 domain-containing protein	GSS_RS07710	DUF1836 domain-containing protein	Lacidipiscis_RS09545	DUF1836 domain-containing protein
LAC1533_RS04445	hemolysin III	GSS_RS07715	membrane protein	Lacidipiscis_RS09540	hemolysin III
LAC1533_RS04450	ArsR family transcriptional regulator	GSS_RS07720	ArsR family transcriptional regulator	Lacidipiscis_RS09535	ArsR family transcriptional regulator
LAC1533_RS04455	RNase HI	GSS_RS07725	RNase HI	Lacidipiscis_RS09530	RNase HI
LAC1533_RS04460	hypothetical protein	GSS_RS07730	hypothetical protein	Lacidipiscis_RS09525	hypothetical protein
LAC1533_RS04465	hypothetical protein	GSS_RS07735	hypothetical protein	Lacidipiscis_RS09520	hypothetical protein
LAC1533_RS04475	LTA synthase family protein			Lacidipiscis_RS01870	LTA synthase family protein
LAC1533_RS04480	glucose-6-phosphate isomerase	GSS_RS07745	glucose-6-phosphate isomerase	Lacidipiscis_RS09150	glucose-6-phosphate isomerase
LAC1533_RS04485 IDENTICAL PARALOGS LAC1533_RS04735 IDENTICAL PARALOGS LAC1533_RS10420	transposase
LAC1533_RS04490	CBS domain-containing protein	GSS_RS07750	CBS domain-containing protein	Lacidipiscis_RS11845	CBS domain-containing protein
LAC1533_RS04495	2,3,4,5-tetrahydropyridine-2,6-dicarboxylate N-acetyltransferase			Lacidipiscis_RS11850	2,3,4,5-tetrahydropyridine-2,6-dicarboxylate N-acetyltransferase
LAC1533_RS04500	amidohydrolase	GSS_RS07760	N-acetyldiaminopimelate deacetylase	Lacidipiscis_RS11855	amidohydrolase
LAC1533_RS04505	mechanosensitive ion channel family protein	GSS_RS07765	mechanosensitive ion channel family protein	Lacidipiscis_RS11860	mechanosensitive ion channel family protein
LAC1533_RS04510	DUF948 domain-containing protein	GSS_RS07770	DUF948 domain-containing protein	Lacidipiscis_RS11865	DUF948 domain-containing protein
LAC1533_RS04515	hypothetical protein	GSS_RS07775	hypothetical protein	Lacidipiscis_RS11870	hypothetical protein
LAC1533_RS04520	aminopeptidase P family protein	GSS_RS07780	aminopeptidase P family protein	Lacidipiscis_RS11875	aminopeptidase P family protein
LAC1533_RS04525	catabolite control protein A	GSS_RS07785	catabolite control protein A	Lacidipiscis_RS11880	catabolite control protein A
LAC1533_RS04530	YebC/PmpR family DNA-binding transcriptional regulator	GSS_RS07790	YebC/PmpR family DNA-binding transcriptional regulator	Lacidipiscis_RS11885	YebC/PmpR family DNA-binding transcriptional regulator
LAC1533_RS04535	competence protein ComG	GSS_RS07795	competence protein ComG	Lacidipiscis_RS11890	competence protein ComG
LAC1533_RS04540	competence protein ComG	GSS_RS07800	ComG operon protein 2	Lacidipiscis_RS11895	competence protein ComG
LAC1533_RS04545	prepilin-type N-terminal cleavage/methylation domain-containing protein	GSS_RS07805	prepilin-type N-terminal cleavage/methylation domain-containing protein	Lacidipiscis_RS11900	prepilin-type N-terminal cleavage/methylation domain-containing protein
LAC1533_RS04550	prepilin-type N-terminal cleavage/methylation domain-containing protein	GSS_RS07810	prepilin-type N-terminal cleavage/methylation domain-containing protein	Lacidipiscis_RS11905	prepilin-type N-terminal cleavage/methylation domain-containing protein
LAC1533_RS04555	hypothetical protein	GSS_RS07815	hypothetical protein	Lacidipiscis_RS11910	hypothetical protein
LAC1533_RS04560	type II secretion system protein	GSS_RS07820	type II secretion system protein	Lacidipiscis_RS11915	prepilin-type cleavage/methylation domain-containing protein
LAC1533_RS04565	hypothetical protein	GSS_RS12905	hypothetical protein	Lacidipiscis_RS11920	hypothetical protein
LAC1533_RS04570	class I SAM-dependent methyltransferase	GSS_RS07830	class I SAM-dependent methyltransferase	Lacidipiscis_RS11925	class I SAM-dependent methyltransferase
LAC1533_RS04575	metallophosphatase			Lacidipiscis_RS11930	metallophosphatase
LAC1533_RS04580	multifunctional 2,3-cyclic-nucleotide 2-phosphodiesterase/5-nucleotidase/3-nucleotidase	GSS_RS07840	multifunctional 2,3-cyclic-nucleotide 2-phosphodiesterase/5-nucleotidase/3-nucleotidase	Lacidipiscis_RS11935	multifunctional 2,3-cyclic-nucleotide 2-phosphodiesterase/5-nucleotidase/3-nucleotidase
LAC1533_RS04585	DUF1027 domain-containing protein	GSS_RS07845	DUF1027 domain-containing protein
LAC1533_RS04590	TIGR01457 family HAD-type hydrolase	GSS_RS07850	TIGR01457 family HAD-type hydrolase	Lacidipiscis_RS13380	TIGR01457 family HAD-type hydrolase
LAC1533_RS04595	TIGR01906 family membrane protein	GSS_RS07855	TIGR01906 family membrane protein	Lacidipiscis_RS13385	TIGR01906 family membrane protein
LAC1533_RS04600	cytochrome o ubiquinol oxidase	GSS_RS07860	membrane protein	Lacidipiscis_RS13390	cytochrome o ubiquinol oxidase
LAC1533_RS04605	NAD(P)/FAD-dependent oxidoreductase	GSS_RS07865	NAD(P)/FAD-dependent oxidoreductase	Lacidipiscis_RS13395	NAD(P)/FAD-dependent oxidoreductase
LAC1533_RS04610	peptidylprolyl isomerase	GSS_RS07870	peptidyl-prolyl cis-trans isomerase	Lacidipiscis_RS13400	peptidylprolyl isomerase
LAC1533_RS04615	general stress protein	GSS_RS07875	general stress protein	Lacidipiscis_RS13405	general stress protein
LAC1533_RS04740	methionine adenosyltransferase	GSS_RS11040	methionine adenosyltransferase	Lacidipiscis_RS11620	methionine adenosyltransferase
LAC1533_RS04745	LysM peptidoglycan-binding domain-containing protein	GSS_RS13355	LysM peptidoglycan-binding domain-containing protein	Lacidipiscis_RS11630	LysM peptidoglycan-binding domain-containing protein
LAC1533_RS04750	leucine--tRNA ligase	GSS_RS11050	leucine--tRNA ligase	Lacidipiscis_RS11635	leucine--tRNA ligase
LAC1533_RS04755	polysaccharide biosynthesis protein	GSS_RS11055	polysaccharide biosynthesis protein	Lacidipiscis_RS11640	polysaccharide biosynthesis protein
LAC1533_RS04760	hypothetical protein	GSS_RS11060	hypothetical protein	Lacidipiscis_RS11645	hypothetical protein
LAC1533_RS04765	type I restriction-modification system subunit M			Lacidipiscis_RS11650	type I restriction-modification system subunit M
LAC1533_RS04770	restriction endonuclease subunit S			Lacidipiscis_RS11655	restriction endonuclease subunit S
LAC1533_RS04775	type I restriction endonuclease subunit R			Lacidipiscis_RS11660	type I restriction endonuclease subunit R
LAC1533_RS04780	site-specific integrase
LAC1533_RS04785	type I restriction endonuclease subunit S
LAC1533_RS04790	restriction endonuclease
LAC1533_RS04805	IS256 family transposase
LAC1533_RS04810	NAD(P)H-hydrate dehydratase	GSS_RS04815	NAD(P)H-hydrate dehydratase	Lacidipiscis_RS12805	NAD(P)H-hydrate dehydratase
LAC1533_RS04815	dienelactone hydrolase	GSS_RS04810	dienelactone hydrolase	Lacidipiscis_RS12800	dienelactone hydrolase
LAC1533_RS04830	hypothetical protein	GSS_RS04800	hypothetical protein	Lacidipiscis_RS12790	hypothetical protein
LAC1533_RS04835	universal stress protein	GSS_RS04795	universal stress protein	Lacidipiscis_RS12785	universal stress protein
LAC1533_RS04840	hypothetical protein	GSS_RS04790	hypothetical protein	Lacidipiscis_RS12780	hypothetical protein
LAC1533_RS04845	group II intron reverse transcriptase/maturase
LAC1533_RS04855	hypothetical protein	GSS_RS04785	hypothetical protein	Lacidipiscis_RS12775	hypothetical protein
LAC1533_RS04860	acetate kinase	GSS_RS04780	acetate kinase	Lacidipiscis_RS12770	acetate kinase
LAC1533_RS04865	hypothetical protein	GSS_RS04775	hypothetical protein	Lacidipiscis_RS12765	hypothetical protein
LAC1533_RS04870	deoxyguanosine kinase	GSS_RS04770	deoxyguanosine kinase	Lacidipiscis_RS12760	deoxyguanosine kinase
LAC1533_RS04880	adenylosuccinate lyase	GSS_RS04765	adenylosuccinate lyase	Lacidipiscis_RS12755	adenylosuccinate lyase
LAC1533_RS04885	LysR family transcriptional regulator	GSS_RS04760	LysR family transcriptional regulator	Lacidipiscis_RS12750	LysR family transcriptional regulator
LAC1533_RS04890	MATE family efflux transporter	GSS_RS04750	MATE family efflux transporter	Lacidipiscis_RS12745	MATE family efflux transporter
LAC1533_RS04895	hypothetical protein	GSS_RS04745	hypothetical protein	Lacidipiscis_RS06335	hypothetical protein
LAC1533_RS04905	arginine--tRNA ligase	GSS_RS04735	arginine--tRNA ligase	Lacidipiscis_RS06325	arginine--tRNA ligase
LAC1533_RS04910	Crp/Fnr family transcriptional regulator	GSS_RS04730	Crp/Fnr family transcriptional regulator	Lacidipiscis_RS08345	Crp/Fnr family transcriptional regulator
LAC1533_RS04915	ArgR family transcriptional regulator	GSS_RS04725	ArgR family transcriptional regulator	Lacidipiscis_RS08350	ArgR family transcriptional regulator
LAC1533_RS04920	carboxypeptidase	GSS_RS04720	carboxypeptidase	Lacidipiscis_RS08355	carboxypeptidase
LAC1533_RS04925	hypothetical protein	GSS_RS04715	hypothetical protein	Lacidipiscis_RS08360	hypothetical protein
LAC1533_RS04930	HD domain-containing protein	GSS_RS04710	HD domain-containing protein	Lacidipiscis_RS08365	HD domain-containing protein
LAC1533_RS04935	peptidylprolyl isomerase	GSS_RS04705	peptidylprolyl isomerase	Lacidipiscis_RS08370	peptidylprolyl isomerase
LAC1533_RS04940	hypothetical protein	GSS_RS04700	hypothetical protein	Lacidipiscis_RS08375	hypothetical protein
LAC1533_RS04945	HIT family protein	GSS_RS04695	HIT family protein	Lacidipiscis_RS08380	HIT family protein
LAC1533_RS04950	ABC transporter ATP-binding protein	GSS_RS12615	ABC transporter ATP-binding protein	Lacidipiscis_RS08385	ABC transporter ATP-binding protein
LAC1533_RS04955	protein ecsB	GSS_RS04685	protein ecsB	Lacidipiscis_RS08390	protein EcsB
LAC1533_RS04960	phosphotransferase	GSS_RS04680	phosphotransferase	Lacidipiscis_RS08395	phosphotransferase
LAC1533_RS04965	tRNA (guanosine(46)-N7)-methyltransferase TrmB	GSS_RS04675	tRNA (guanosine(46)-N7)-methyltransferase TrmB	Lacidipiscis_RS05790	tRNA (guanosine(46)-N7)-methyltransferase TrmB
LAC1533_RS04970	thioredoxin	GSS_RS04670	thioredoxin	Lacidipiscis_RS05785	thioredoxin
LAC1533_RS04975	DUF4479 domain-containing protein	GSS_RS04665	DUF4479 domain-containing protein	Lacidipiscis_RS05780	DUF4479 domain-containing protein
LAC1533_RS04980	DNA translocase FtsK	GSS_RS04660	DNA translocase FtsK	Lacidipiscis_RS05775	DNA translocase FtsK
LAC1533_RS04985	UDP-N-acetylmuramate--L-alanine ligase	GSS_RS04655	UDP-N-acetylmuramate--L-alanine ligase	Lacidipiscis_RS05770	UDP-N-acetylmuramate--L-alanine ligase
LAC1533_RS04990	BAX inhibitor (BI)-1/YccA family protein	GSS_RS04650	BAX inhibitor (BI)-1/YccA family protein	Lacidipiscis_RS05765	BAX inhibitor (BI)-1/YccA family protein
LAC1533_RS04995	DNA polymerase I	GSS_RS04645	DNA polymerase I	Lacidipiscis_RS05760	DNA polymerase I
LAC1533_RS05000	DNA-formamidopyrimidine glycosylase	GSS_RS04635	DNA-formamidopyrimidine glycosylase	Lacidipiscis_RS05755	DNA-formamidopyrimidine glycosylase
LAC1533_RS05005	transcriptional repressor NrdR	GSS_RS04630	transcriptional repressor NrdR	Lacidipiscis_RS05745	transcriptional repressor NrdR
LAC1533_RS05010	chromosome replication initiation / membrane attachment protein	GSS_RS04625	chromosome replication initiation / membrane attachment protein	Lacidipiscis_RS05740	chromosome replication initiation / membrane attachment protein
LAC1533_RS05015	primosomal protein DnaI	GSS_RS04620	primosomal protein DnaI	Lacidipiscis_RS05735	primosomal protein DnaI
LAC1533_RS05020	threonine--tRNA ligase	GSS_RS04615	threonine--tRNA ligase	Lacidipiscis_RS05730	threonine--tRNA ligase
LAC1533_RS05025	translation initiation factor IF-3	GSS_RS04610	translation initiation factor IF-3	Lacidipiscis_RS05725	translation initiation factor IF-3
LAC1533_RS05030	50S ribosomal protein L35	GSS_RS04605	50S ribosomal protein L35	Lacidipiscis_RS05720	50S ribosomal protein L35
LAC1533_RS05035	50S ribosomal protein L20	GSS_RS04600	50S ribosomal protein L20	Lacidipiscis_RS05715	50S ribosomal protein L20
LAC1533_RS05040	YqeG family HAD IIIA-type phosphatase	GSS_RS04595	YqeG family HAD IIIA-type phosphatase	Lacidipiscis_RS05710	YqeG family HAD IIIA-type phosphatase
LAC1533_RS05045	ribosome biogenesis GTPase YqeH	GSS_RS04590	ribosome biogenesis GTPase YqeH	Lacidipiscis_RS05705	ribosome biogenesis GTPase YqeH
LAC1533_RS05050	ribosome assembly RNA-binding protein YhbY	GSS_RS04585	ribosome assembly RNA-binding protein YhbY	Lacidipiscis_RS05700	ribosome assembly RNA-binding protein YhbY
LAC1533_RS05055	nicotinate-nucleotide adenylyltransferase	GSS_RS04580	nicotinate-nucleotide adenylyltransferase	Lacidipiscis_RS05695	nicotinate-nucleotide adenylyltransferase
LAC1533_RS05060	HD domain-containing protein	GSS_RS04570	HD domain-containing protein	Lacidipiscis_RS05690	HD domain-containing protein
LAC1533_RS05065	ribosome silencing factor	GSS_RS04565	ribosome silencing factor	Lacidipiscis_RS05685	ribosome silencing factor
LAC1533_RS05070	class I SAM-dependent methyltransferase	GSS_RS04560	class I SAM-dependent methyltransferase	Lacidipiscis_RS05680	class I SAM-dependent methyltransferase
LAC1533_RS05075	nucleotidyltransferase	GSS_RS04555	nucleotidyltransferase	Lacidipiscis_RS05675	nucleotidyltransferase
LAC1533_RS05080	hypothetical protein	GSS_RS04550	hypothetical protein	Lacidipiscis_RS05670	DNA-binding protein
LAC1533_RS05085	50S ribosomal protein L32	GSS_RS04545	50S ribosomal protein L32	Lacidipiscis_RS05665	50S ribosomal protein L32
LAC1533_RS05090	YihA family ribosome biogenesis GTP-binding protein	GSS_RS04540	YihA family ribosome biogenesis GTP-binding protein	Lacidipiscis_RS05660	YihA family ribosome biogenesis GTP-binding protein
LAC1533_RS05095	nucleotide pyrophosphohydrolase	GSS_RS04535	nucleotide pyrophosphohydrolase	Lacidipiscis_RS05655	nucleotide pyrophosphohydrolase
LAC1533_RS05100	hypothetical protein	GSS_RS12605	hypothetical protein	Lacidipiscis_RS05650	hypothetical protein
LAC1533_RS05105	amino acid ABC transporter ATP-binding protein	GSS_RS04525	amino acid ABC transporter ATP-binding protein	Lacidipiscis_RS05645	amino acid ABC transporter ATP-binding protein
LAC1533_RS05110	excinuclease ABC subunit UvrC			Lacidipiscis_RS05640	excinuclease ABC subunit UvrC
LAC1533_RS05115	GTPase ObgE	GSS_RS04515	GTPase ObgE	Lacidipiscis_RS05635	GTPase ObgE
LAC1533_RS05120	acetyltransferase	GSS_RS04510	acetyltransferase	Lacidipiscis_RS05630	acetyltransferase
LAC1533_RS05125	hypothetical protein	GSS_RS04505	hypothetical protein	Lacidipiscis_RS11440	hypothetical protein
LAC1533_RS05135	ribonuclease Z	GSS_RS04495	ribonuclease Z	Lacidipiscis_RS09595	ribonuclease Z
LAC1533_RS05140	SDR family NAD(P)-dependent oxidoreductase	GSS_RS04490	SDR family NAD(P)-dependent oxidoreductase	Lacidipiscis_RS09600	SDR family NAD(P)-dependent oxidoreductase
LAC1533_RS05145	DUF1049 domain-containing protein	GSS_RS04485	DUF1049 domain-containing protein	Lacidipiscis_RS09605	DUF1049 domain-containing protein
LAC1533_RS05150	single-stranded-DNA-specific exonuclease RecJ	GSS_RS04480	single-stranded-DNA-specific exonuclease RecJ	Lacidipiscis_RS09610	single-stranded-DNA-specific exonuclease RecJ
LAC1533_RS05155	adenine phosphoribosyltransferase	GSS_RS04475	adenine phosphoribosyltransferase	Lacidipiscis_RS09615	adenine phosphoribosyltransferase
LAC1533_RS05160	hypothetical protein	GSS_RS04465	hypothetical protein	Lacidipiscis_RS09160	hypothetical protein
LAC1533_RS05165	helicase-exonuclease AddAB subunit AddA	GSS_RS04460	helicase-exonuclease AddAB subunit AddA	Lacidipiscis_RS09165	helicase-exonuclease AddAB subunit AddA
LAC1533_RS05170	hypothetical protein	GSS_RS04455	hypothetical protein	Lacidipiscis_RS09170	hypothetical protein
LAC1533_RS05175	hypothetical protein	GSS_RS04450	hypothetical protein	Lacidipiscis_RS09175	hypothetical protein
LAC1533_RS05180	50S ribosomal protein L33	GSS_RS04440	50S ribosomal protein L33	Lacidipiscis_RS09640	50S ribosomal protein L33
LAC1533_RS05190	group II intron reverse transcriptase/maturase
LAC1533_RS05195	5-formyltetrahydrofolate cyclo-ligase	GSS_RS12595	5-formyltetrahydrofolate cyclo-ligase	Lacidipiscis_RS09645	5-formyltetrahydrofolate cyclo-ligase
LAC1533_RS05200	rhomboid family intramembrane serine protease	GSS_RS04425	rhomboid family intramembrane serine protease	Lacidipiscis_RS09650	rhomboid family intramembrane serine protease
LAC1533_RS05205	DUF910 domain-containing protein	GSS_RS04420	DUF910 domain-containing protein	Lacidipiscis_RS09655	DUF910 domain-containing protein
LAC1533_RS05210	glucokinase	GSS_RS04415	glucokinase	Lacidipiscis_RS09660	glucokinase
LAC1533_RS05215	rhodanese-like domain-containing protein	GSS_RS04410	rhodanese-like domain-containing protein	Lacidipiscis_RS09665	rhodanese-like domain-containing protein
LAC1533_RS05220	tRNA (adenosine(37)-N6)-dimethylallyltransferase MiaA	GSS_RS04405	tRNA (adenosine(37)-N6)-dimethylallyltransferase MiaA	Lacidipiscis_RS09670	tRNA (adenosine(37)-N6)-dimethylallyltransferase MiaA
LAC1533_RS05225	MerR family transcriptional regulator	GSS_RS04400	MerR family transcriptional regulator	Lacidipiscis_RS09675	MerR family transcriptional regulator
LAC1533_RS05230	type I glutamate--ammonia ligase	GSS_RS04395	type I glutamate--ammonia ligase	Lacidipiscis_RS09680	type I glutamate--ammonia ligase
LAC1533_RS05235	hypothetical protein	GSS_RS04390	hypothetical protein
LAC1533_RS05240	guanylate kinase	GSS_RS04385	guanylate kinase	Lacidipiscis_RS09685	guanylate kinase
LAC1533_RS05245	DNA-directed RNA polymerase subunit omega	GSS_RS04380	DNA-directed RNA polymerase subunit omega	Lacidipiscis_RS09690	DNA-directed RNA polymerase subunit omega
LAC1533_RS05250	bifunctional phosphopantothenoylcysteine decarboxylase/phosphopantothenate--cysteine ligase CoaBC	GSS_RS12590	bifunctional phosphopantothenoylcysteine decarboxylase/phosphopantothenate--cysteine ligase CoaBC	Lacidipiscis_RS09695	bifunctional phosphopantothenoylcysteine decarboxylase/phosphopantothenate--cysteine ligase CoaBC
LAC1533_RS05255	primosomal protein N			Lacidipiscis_RS09700	primosomal protein N
LAC1533_RS05260	methionyl-tRNA formyltransferase	GSS_RS04360	methionyl-tRNA formyltransferase	Lacidipiscis_RS09705	methionyl-tRNA formyltransferase
LAC1533_RS05265	16S rRNA (cytosine(967)-C(5))-methyltransferase RsmB	GSS_RS04355	16S rRNA (cytosine(967)-C(5))-methyltransferase RsmB	Lacidipiscis_RS09710	16S rRNA (cytosine(967)-C(5))-methyltransferase RsmB
LAC1533_RS05270	serine/threonine-protein phosphatase	GSS_RS04350	serine/threonine-protein phosphatase	Lacidipiscis_RS09715	serine/threonine-protein phosphatase
LAC1533_RS05275	serine/threonine protein kinase			Lacidipiscis_RS09720	serine/threonine protein kinase
LAC1533_RS05280	ribosome small subunit-dependent GTPase A	GSS_RS04330	ribosome small subunit-dependent GTPase A	Lacidipiscis_RS09725	ribosome small subunit-dependent GTPase A
LAC1533_RS05285	ribulose-phosphate 3-epimerase	GSS_RS04325	ribulose-phosphate 3-epimerase	Lacidipiscis_RS09730	ribulose-phosphate 3-epimerase
LAC1533_RS05290	thiamine diphosphokinase	GSS_RS04320	thiamine diphosphokinase	Lacidipiscis_RS09735	thiamine diphosphokinase
LAC1533_RS05295	50S ribosomal protein L28	GSS_RS04315	50S ribosomal protein L28	Lacidipiscis_RS09740	50S ribosomal protein L28
LAC1533_RS05300	Asp23/Gls24 family envelope stress response protein	GSS_RS04310	Asp23/Gls24 family envelope stress response protein	Lacidipiscis_RS09745	Asp23/Gls24 family envelope stress response protein
LAC1533_RS05305	DAK2 domain-containing protein	GSS_RS04305	DAK2 domain-containing protein	Lacidipiscis_RS09750	DAK2 domain-containing protein
LAC1533_RS05310	DNA helicase RecG			Lacidipiscis_RS09755	DNA helicase RecG
LAC1533_RS05315	phosphate acyltransferase PlsX	GSS_RS04295	phosphate acyltransferase PlsX	Lacidipiscis_RS09760	phosphate acyltransferase PlsX
LAC1533_RS05325	acyl carrier protein	GSS_RS04290	acyl carrier protein	Lacidipiscis_RS09765	acyl carrier protein
LAC1533_RS05330	ribonuclease III	GSS_RS04275	ribonuclease III	Lacidipiscis_RS09770	ribonuclease III
LAC1533_RS05335	chromosome segregation protein SMC	GSS_RS12570	chromosome segregation protein SMC	Lacidipiscis_RS09775	chromosome segregation protein SMC
LAC1533_RS05340	signal recognition particle-docking protein FtsY	GSS_RS04255	signal recognition particle-docking protein FtsY	Lacidipiscis_RS09780	signal recognition particle-docking protein FtsY
LAC1533_RS05345	putative DNA-binding protein			Lacidipiscis_RS09785	putative DNA-binding protein
LAC1533_RS05350	signal recognition particle protein			Lacidipiscis_RS09790	signal recognition particle protein
LAC1533_RS05355	30S ribosomal protein S16	GSS_RS04240	30S ribosomal protein S16	Lacidipiscis_RS09795	30S ribosomal protein S16
LAC1533_RS05360	KH domain-containing protein	GSS_RS04235	KH domain-containing protein	Lacidipiscis_RS09800	KH domain-containing protein
LAC1533_RS05365	ribosome maturation factor RimM	GSS_RS04230	ribosome maturation factor RimM	Lacidipiscis_RS09805	ribosome maturation factor RimM
LAC1533_RS05370	tRNA (guanosine(37)-N1)-methyltransferase TrmD	GSS_RS04225	tRNA (guanosine(37)-N1)-methyltransferase TrmD	Lacidipiscis_RS09810	tRNA (guanosine(37)-N1)-methyltransferase TrmD
LAC1533_RS05375	50S ribosomal protein L19	GSS_RS04220	50S ribosomal protein L19	Lacidipiscis_RS09815	50S ribosomal protein L19
LAC1533_RS05385	UMP kinase	GSS_RS04215	UMP kinase	Lacidipiscis_RS09820	UMP kinase
LAC1533_RS05390	ribosome recycling factor	GSS_RS04210	ribosome recycling factor	Lacidipiscis_RS09825	ribosome recycling factor
LAC1533_RS05395	isoprenyl transferase	GSS_RS04205	isoprenyl transferase	Lacidipiscis_RS09830	isoprenyl transferase
LAC1533_RS05400	phosphatidate cytidylyltransferase	GSS_RS04200	phosphatidate cytidylyltransferase	Lacidipiscis_RS09835	phosphatidate cytidylyltransferase
LAC1533_RS05405	RIP metalloprotease RseP	GSS_RS04195	RIP metalloprotease RseP	Lacidipiscis_RS09840	RIP metalloprotease RseP
LAC1533_RS05410	proline--tRNA ligase	GSS_RS04190	proline--tRNA ligase	Lacidipiscis_RS09845	proline--tRNA ligase
LAC1533_RS05415	PolC-type DNA polymerase III	GSS_RS04185	PolC-type DNA polymerase III	Lacidipiscis_RS09850	PolC-type DNA polymerase III
LAC1533_RS05420	ribosome maturation factor RimP	GSS_RS04180	ribosome maturation factor RimP	Lacidipiscis_RS09855	ribosome maturation factor RimP
LAC1533_RS05425	transcription termination/antitermination protein NusA	GSS_RS04175	transcription termination/antitermination protein NusA	Lacidipiscis_RS09860	transcription termination/antitermination protein NusA
LAC1533_RS05430	DUF448 domain-containing protein	GSS_RS04170	DUF448 domain-containing protein	Lacidipiscis_RS09865	DUF448 domain-containing protein
LAC1533_RS05435	hypothetical protein	GSS_RS04165	hypothetical protein	Lacidipiscis_RS09870	hypothetical protein
LAC1533_RS05440	translation initiation factor IF-2	GSS_RS04160	translation initiation factor IF-2	Lacidipiscis_RS09875	translation initiation factor IF-2
LAC1533_RS05445	30S ribosome-binding factor RbfA	GSS_RS04155	30S ribosome-binding factor RbfA	Lacidipiscis_RS09880	30S ribosome-binding factor RbfA
LAC1533_RS05450	tRNA pseudouridine(55) synthase TruB	GSS_RS04150	tRNA pseudouridine(55) synthase TruB	Lacidipiscis_RS09885	tRNA pseudouridine(55) synthase TruB
LAC1533_RS05455	riboflavin biosynthesis protein RibF	GSS_RS04145	bifunctional riboflavin kinase/FAD synthetase	Lacidipiscis_RS09890	riboflavin biosynthesis protein RibF
LAC1533_RS05460	heat-inducible transcription repressor HrcA	GSS_RS04140	heat-inducible transcription repressor HrcA	Lacidipiscis_RS09895	heat-inducible transcription repressor HrcA
LAC1533_RS05465	nucleotide exchange factor GrpE	GSS_RS04135	nucleotide exchange factor GrpE	Lacidipiscis_RS09900	nucleotide exchange factor GrpE
LAC1533_RS05470	molecular chaperone DnaK	GSS_RS04130	molecular chaperone DnaK	Lacidipiscis_RS09905	molecular chaperone DnaK
LAC1533_RS05475	molecular chaperone DnaJ	GSS_RS04125	molecular chaperone DnaJ	Lacidipiscis_RS09910	molecular chaperone DnaJ
LAC1533_RS05480	nucleoside deoxyribosyltransferase	GSS_RS04115	nucleoside deoxyribosyltransferase	Lacidipiscis_RS10135	nucleoside 2-deoxyribosyltransferase
LAC1533_RS05485	N-acetyltransferase	GSS_RS04110	N-acetyltransferase	Lacidipiscis_RS00175	N-acetyltransferase
LAC1533_RS05490	alpha/beta hydrolase	GSS_RS04105	alpha/beta hydrolase	Lacidipiscis_RS00170	alpha/beta hydrolase
LAC1533_RS05495	pyruvate oxidase	GSS_RS04100	pyruvate oxidase	Lacidipiscis_RS00160	pyruvate oxidase
LAC1533_RS05500	serine hydroxymethyltransferase	GSS_RS04095	serine hydroxymethyltransferase	Lacidipiscis_RS00155	serine hydroxymethyltransferase
LAC1533_RS05505	N-acetyltransferase	GSS_RS04090	N-acetyltransferase	Lacidipiscis_RS06260	N-acetyltransferase
LAC1533_RS05510	aldo/keto reductase	GSS_RS04085	aldo/keto reductase	Lacidipiscis_RS06265	aldo/keto reductase
LAC1533_RS05515	hypothetical protein	GSS_RS04080	hypothetical protein	Lacidipiscis_RS06270	hypothetical protein
LAC1533_RS05520	TIGR00730 family Rossman fold protein	GSS_RS04075	TIGR00730 family Rossman fold protein	Lacidipiscis_RS06275	TIGR00730 family Rossman fold protein
LAC1533_RS05525	pyruvate oxidase	GSS_RS04070	pyruvate oxidase
LAC1533_RS05530	elongation factor 4	GSS_RS04060	elongation factor 4	Lacidipiscis_RS06285	elongation factor 4
LAC1533_RS05540	death-on-curing family protein	GSS_RS13715	death-on-curing family protein	Lacidipiscis_RS07940	type II toxin-antitoxin system death-on-curing family toxin
LAC1533_RS05550	IS30 family transposase	GSS_RS04040	IS30 family transposase	Lacidipiscis_RS10055	IS30 family transposase
LAC1533_RS05555	hypothetical protein			Lacidipiscis_RS10050	hypothetical protein
LAC1533_RS05575	hypothetical protein	GSS_RS04025	hypothetical protein	Lacidipiscis_RS10045	hypothetical protein
LAC1533_RS05590	type VI secretion protein ImpB	GSS_RS04010	type VI secretion protein ImpB	Lacidipiscis_RS07640	excinuclease ABC subunit A
LAC1533_RS05595	hypothetical protein	GSS_RS04005	hypothetical protein	Lacidipiscis_RS07645	hypothetical protein
LAC1533_RS05600	RNA methyltransferase	GSS_RS04000	RNA methyltransferase	Lacidipiscis_RS07650	RNA methyltransferase
LAC1533_RS05605	hydrolase	GSS_RS03995	hydrolase	Lacidipiscis_RS07655	hydrolase
LAC1533_RS05610	transcriptional regulator	GSS_RS11445	transcriptional regulator	Lacidipiscis_RS07660	transcriptional regulator
LAC1533_RS05615	phenylalanine--tRNA ligase subunit alpha	GSS_RS03990	phenylalanine--tRNA ligase subunit alpha	Lacidipiscis_RS07665	phenylalanine--tRNA ligase subunit alpha
LAC1533_RS05620	phenylalanine--tRNA ligase subunit beta			Lacidipiscis_RS07670	phenylalanine--tRNA ligase subunit beta
LAC1533_RS05625	endolytic transglycosylase MltG			Lacidipiscis_RS11345	endolytic transglycosylase MltG
LAC1533_RS05630	uridine kinase	GSS_RS03975	uridine kinase	Lacidipiscis_RS11335	uridine kinase
LAC1533_RS05635	transcription elongation factor GreA	GSS_RS03970	transcription elongation factor GreA	Lacidipiscis_RS11330	transcription elongation factor GreA
LAC1533_RS05645	group II intron reverse transcriptase/maturase
LAC1533_RS05650	NADPH-dependent oxidoreductase	GSS_RS12530	NADPH-dependent oxidoreductase	Lacidipiscis_RS01510	NADPH-dependent oxidoreductase
LAC1533_RS05655	hypothetical protein	GSS_RS03955	hypothetical protein	Lacidipiscis_RS01505	hypothetical protein
LAC1533_RS05660	nucleoside hydrolase	GSS_RS03950	nucleoside hydrolase	Lacidipiscis_RS01500	nucleoside hydrolase
LAC1533_RS05665	50S ribosomal protein L11 methyltransferase			Lacidipiscis_RS01485	50S ribosomal protein L11 methyltransferase
LAC1533_RS05670	16S rRNA (uracil(1498)-N(3))-methyltransferase	GSS_RS03940	16S rRNA (uracil(1498)-N(3))-methyltransferase	Lacidipiscis_RS01480	16S rRNA (uracil(1498)-N(3))-methyltransferase
LAC1533_RS05675	site-specific integrase			Lacidipiscis_RS01475	site-specific integrase
LAC1533_RS05680	hypothetical protein			Lacidipiscis_RS01470	hypothetical protein
LAC1533_RS05685	helix-turn-helix domain-containing protein
LAC1533_RS05690	XRE family transcriptional regulator
LAC1533_RS05695	hypothetical protein
LAC1533_RS05700	DUF2188 domain-containing protein			Lacidipiscis_RS01440	DUF2188 domain-containing protein
LAC1533_RS05705	hypothetical protein			Lacidipiscis_RS01430	hypothetical protein
LAC1533_RS05710	hypothetical protein
LAC1533_RS05715	hypothetical protein
LAC1533_RS05720	hypothetical protein			Lacidipiscis_RS01415	hypothetical protein
LAC1533_RS05725	hypothetical protein
LAC1533_RS05730	hypothetical protein
LAC1533_RS05735	hypothetical protein
LAC1533_RS05740	single-stranded DNA-binding protein
LAC1533_RS05745	hypothetical protein
LAC1533_RS05750	DNA replication protein
LAC1533_RS05755	hypothetical protein
LAC1533_RS05760	hypothetical protein			Lacidipiscis_RS01385	hypothetical protein
LAC1533_RS05765	RusA family crossover junction endodeoxyribonuclease			Lacidipiscis_RS01380	RusA family crossover junction endodeoxyribonuclease
LAC1533_RS05770	hypothetical protein
LAC1533_RS05775	hypothetical protein			Lacidipiscis_RS01375	hypothetical protein
LAC1533_RS05780	hypothetical protein
LAC1533_RS05785	hypothetical protein
LAC1533_RS05790	site-specific DNA-methyltransferase
LAC1533_RS05795	hypothetical protein
LAC1533_RS05800	hypothetical protein			Lacidipiscis_RS01365	hypothetical protein
LAC1533_RS05805	terminase small subunit			Lacidipiscis_RS01360	terminase small subunit
LAC1533_RS05810	PBSX family phage terminase large subunit			Lacidipiscis_RS01355	PBSX family phage terminase large subunit
LAC1533_RS05815	phage portal protein			Lacidipiscis_RS01350	phage portal protein
LAC1533_RS05820	minor capsid protein			Lacidipiscis_RS01345	minor capsid protein
LAC1533_RS05825	hypothetical protein			Lacidipiscis_RS01340	hypothetical protein
LAC1533_RS05830	capsid protein			Lacidipiscis_RS01335	hypothetical protein
LAC1533_RS05835	hypothetical protein
LAC1533_RS05840	hypothetical protein			Lacidipiscis_RS01320	hypothetical protein
LAC1533_RS05845	capsid protein			Lacidipiscis_RS01315	capsid protein
LAC1533_RS05850	capsid protein			Lacidipiscis_RS01310	capsid protein
LAC1533_RS05855	hypothetical protein			Lacidipiscis_RS01305	hypothetical protein
LAC1533_RS05860	capsid protein			Lacidipiscis_RS01300	capsid protein
LAC1533_RS05865	hypothetical protein			Lacidipiscis_RS01295	hypothetical protein
LAC1533_RS05870	hypothetical protein			Lacidipiscis_RS01290	hypothetical protein
LAC1533_RS05875	hypothetical protein			Lacidipiscis_RS01285	hypothetical protein
LAC1533_RS05880	hypothetical protein			Lacidipiscis_RS01280	hypothetical protein
LAC1533_RS05885	hypothetical protein			Lacidipiscis_RS01275	hypothetical protein
LAC1533_RS05890	hypothetical protein			Lacidipiscis_RS01270	hypothetical protein
LAC1533_RS05895	hypothetical protein			Lacidipiscis_RS01265	hypothetical protein
LAC1533_RS05900	collagen-like protein
LAC1533_RS05905	hypothetical protein
LAC1533_RS05910	hypothetical protein			Lacidipiscis_RS01260	hypothetical protein
LAC1533_RS05920	hypothetical protein
LAC1533_RS05925	DUF2335 domain-containing protein
LAC1533_RS05930	hypothetical protein	GSS_RS03935	hypothetical protein	Lacidipiscis_RS01240	hypothetical protein
LAC1533_RS05935	bifunctional (p)ppGpp synthetase/guanosine-3,5-bis(diphosphate) 3-pyrophosphohydrolase	GSS_RS03930	bifunctional (p)ppGpp synthetase/guanosine-3,5-bis(diphosphate) 3-pyrophosphohydrolase	Lacidipiscis_RS01235	bifunctional (p)ppGpp synthetase/guanosine-3,5-bis(diphosphate) 3-pyrophosphohydrolase
LAC1533_RS05940	D-tyrosyl-tRNA(Tyr) deacylase	GSS_RS03925	D-tyrosyl-tRNA(Tyr) deacylase	Lacidipiscis_RS01230	D-tyrosyl-tRNA(Tyr) deacylase
LAC1533_RS05945	esterase	GSS_RS03915	alpha/beta hydrolase fold family protein	Lacidipiscis_RS01225	esterase
LAC1533_RS05950	haloacid dehalogenase	GSS_RS03910	haloacid dehalogenase-like hydrolase	Lacidipiscis_RS01220	haloacid dehalogenase
LAC1533_RS05955	N-acetylmuramoyl-L-alanine amidase	GSS_RS03905	N-acetylmuramoyl-L-alanine amidase	Lacidipiscis_RS02320	N-acetylmuramoyl-L-alanine amidase
LAC1533_RS05960	histidine--tRNA ligase	GSS_RS03900	histidine--tRNA ligase	Lacidipiscis_RS02315	histidine--tRNA ligase
LAC1533_RS05965	aspartate--tRNA ligase	GSS_RS03895	aspartate--tRNA ligase	Lacidipiscis_RS02310	aspartate--tRNA ligase
LAC1533_RS05970	YitT family protein	GSS_RS03890	YitT family protein	Lacidipiscis_RS02305	YitT family protein
LAC1533_RS05975	teichoic acid biosynthesis protein	GSS_RS03885	teichoic acid biosynthesis protein	Lacidipiscis_RS02300	teichoic acid biosynthesis protein
LAC1533_RS05980	deoxyribonuclease IV	GSS_RS03880	deoxyribonuclease IV	Lacidipiscis_RS02295	deoxyribonuclease IV
LAC1533_RS05985	kinase/pyrophosphorylase	GSS_RS03875	kinase/pyrophosphorylase	Lacidipiscis_RS02290	kinase/pyrophosphorylase
LAC1533_RS05990	30S ribosomal protein S21	GSS_RS03870	30S ribosomal protein S21	Lacidipiscis_RS02285	30S ribosomal protein S21
LAC1533_RS05995	GatB/YqeY domain-containing protein	GSS_RS03865	GatB/YqeY domain-containing protein	Lacidipiscis_RS02280	GatB/YqeY domain-containing protein
LAC1533_RS06000	PhoH family protein	GSS_RS03860	PhoH family protein	Lacidipiscis_RS04615	PhoH family protein
LAC1533_RS06005	rRNA maturation RNase YbeY	GSS_RS03855	rRNA maturation RNase YbeY	Lacidipiscis_RS04620	rRNA maturation RNase YbeY
LAC1533_RS06010	diacylglycerol kinase	GSS_RS03850	diacylglycerol kinase	Lacidipiscis_RS04625	UDP kinase
LAC1533_RS06015	GTPase Era	GSS_RS03845	GTPase Era	Lacidipiscis_RS04630	GTPase Era
LAC1533_RS06020	DNA repair protein RecO	GSS_RS03840	DNA repair protein RecO	Lacidipiscis_RS04635	DNA repair protein RecO
LAC1533_RS06025	glycine--tRNA ligase subunit alpha	GSS_RS03835	glycine--tRNA ligase subunit alpha	Lacidipiscis_RS07850	glycine--tRNA ligase subunit alpha
LAC1533_RS06030	glycine--tRNA ligase subunit beta	GSS_RS03830	glycine--tRNA ligase subunit beta	Lacidipiscis_RS07845	glycine--tRNA ligase subunit beta
LAC1533_RS06035	DNA primase	GSS_RS03825	DNA primase	Lacidipiscis_RS07840	DNA primase
LAC1533_RS06040	RNA polymerase sigma factor RpoD	GSS_RS03820	RNA polymerase sigma factor RpoD	Lacidipiscis_RS07835	RNA polymerase sigma factor RpoD
LAC1533_RS06045	tRNA (adenine(22)-N(1))-methyltransferase TrmK	GSS_RS03815	tRNA (adenine(22)-N(1))-methyltransferase TrmK	Lacidipiscis_RS11250	SAM-dependent methyltransferase
LAC1533_RS06050	Nif3-like dinuclear metal center hexameric protein	GSS_RS03810	Nif3-like dinuclear metal center hexameric protein	Lacidipiscis_RS11245	Nif3-like dinuclear metal center hexameric protein
LAC1533_RS06055	peptidase T	GSS_RS03805	peptidase T	Lacidipiscis_RS11240	peptidase T
LAC1533_RS06080	ATP-dependent chaperone ClpB	GSS_RS00005	chaperone ClpB	Lacidipiscis_RS11235	ATP-dependent chaperone ClpB
LAC1533_RS06090	group II intron reverse transcriptase/maturase
LAC1533_RS06095	DUF2929 domain-containing protein			Lacidipiscis_RS10175	DUF2929 domain-containing protein
LAC1533_RS06100	DNA polymerase III subunit alpha	GSS_RS00020	DNA polymerase III subunit alpha	Lacidipiscis_RS10170	DNA polymerase III subunit alpha
LAC1533_RS06105	6-phosphofructokinase	GSS_RS00025	6-phosphofructokinase	Lacidipiscis_RS10165	6-phosphofructokinase
LAC1533_RS06110	pyruvate kinase	GSS_RS00030	pyruvate kinase	Lacidipiscis_RS10160	pyruvate kinase
LAC1533_RS06115	DUF441 domain-containing protein	GSS_RS00035	DUF441 domain-containing protein	Lacidipiscis_RS05240	DUF441 domain-containing protein
LAC1533_RS06120	S1 RNA-binding protein	GSS_RS00040	S1 RNA-binding protein	Lacidipiscis_RS05245	DNA-binding protein
LAC1533_RS06125	transcriptional repressor	GSS_RS00045	transcriptional repressor	Lacidipiscis_RS05250	transcriptional repressor
LAC1533_RS06130	site-specific tyrosine recombinase XerD	GSS_RS11455	site-specific tyrosine recombinase XerD	Lacidipiscis_RS05255	site-specific tyrosine recombinase XerD
LAC1533_RS06135	GNAT family N-acetyltransferase	GSS_RS00050	GNAT family N-acetyltransferase	Lacidipiscis_RS05260	GNAT family N-acetyltransferase
LAC1533_RS06140	rifampin ADP-ribosyl transferase	GSS_RS00055	rifampin ADP-ribosyl transferase	Lacidipiscis_RS05265	rifampin ADP-ribosyl transferase
LAC1533_RS06145	SMC-Scp complex subunit ScpB	GSS_RS00060	SMC-Scp complex subunit ScpB	Lacidipiscis_RS05270	SMC-Scp complex subunit ScpB
LAC1533_RS06150	rRNA pseudouridine synthase	GSS_RS00065	rRNA pseudouridine synthase	Lacidipiscis_RS05275	rRNA pseudouridine synthase
LAC1533_RS06155	hypothetical protein	GSS_RS00070	hypothetical protein	Lacidipiscis_RS05280	hypothetical protein
LAC1533_RS06160	ATP-dependent DNA helicase RecQ	GSS_RS00075	ATP-dependent DNA helicase RecQ	Lacidipiscis_RS05285	ATP-dependent DNA helicase RecQ
LAC1533_RS06165	LysM domain-containing protein	GSS_RS00080	LysM domain-containing protein	Lacidipiscis_RS03645	LysM domain-containing protein
LAC1533_RS06170	(d)CMP kinase			Lacidipiscis_RS03640	(d)CMP kinase
LAC1533_RS06175	30S ribosomal protein S1	GSS_RS00090	30S ribosomal protein S1	Lacidipiscis_RS03635	30S ribosomal protein S1
LAC1533_RS06180	ribosome biogenesis GTPase Der	GSS_RS00095	ribosome biogenesis GTPase Der	Lacidipiscis_RS03630	ribosome biogenesis GTPase Der
LAC1533_RS06185	HU family DNA-binding protein	GSS_RS00100	HU family DNA-binding protein	Lacidipiscis_RS03625	HU family DNA-binding protein
LAC1533_RS06190	tetratricopeptide repeat protein	GSS_RS00105	tetratricopeptide repeat protein	Lacidipiscis_RS03615	tetratricopeptide repeat protein
LAC1533_RS06195 IDENTICAL PARALOGS LAC1533_RS08855	IS30 family transposase			Lacidipiscis_RS00015	IS30 family transposase
LAC1533_RS06200	hypothetical protein	GSS_RS00110	hypothetical protein	Lacidipiscis_RS03610	hypothetical protein
LAC1533_RS06205	4-hydroxy-tetrahydrodipicolinate reductase	GSS_RS00115	4-hydroxy-tetrahydrodipicolinate reductase	Lacidipiscis_RS03595	4-hydroxy-tetrahydrodipicolinate reductase
LAC1533_RS06210	CCA tRNA nucleotidyltransferase	GSS_RS00120	CCA tRNA nucleotidyltransferase	Lacidipiscis_RS03590	CCA tRNA nucleotidyltransferase
LAC1533_RS06215	ABC transporter ATP-binding protein	GSS_RS00125	ABC transporter ATP-binding protein	Lacidipiscis_RS03585	ABC transporter ATP-binding protein
LAC1533_RS06220	thymidylate synthase	GSS_RS00130	thymidylate synthase	Lacidipiscis_RS03580	thymidylate synthase
LAC1533_RS06225	lipase	GSS_RS00135	lipase/acylhydrolase	Lacidipiscis_RS03575	lipase
LAC1533_RS06230	DUF2140 domain-containing protein	GSS_RS00140	DUF2140 domain-containing protein	Lacidipiscis_RS03570	DUF2140 domain-containing protein
LAC1533_RS06235	YozE family protein	GSS_RS13910	hypothetical protein	Lacidipiscis_RS03565	YozE family protein
LAC1533_RS06240	PDZ domain-containing protein	GSS_RS00155	PDZ domain-containing protein	Lacidipiscis_RS03555	PDZ domain-containing protein
LAC1533_RS06245	ribosome biogenesis GTPase YlqF			Lacidipiscis_RS03550	ribosome biogenesis GTPase YlqF
LAC1533_RS06250	ribonuclease HII			Lacidipiscis_RS03545	ribonuclease HII
LAC1533_RS06255	DNA-protecting protein DprA	GSS_RS00170	DNA-protecting protein DprA	Lacidipiscis_RS03540	DNA-protecting protein DprA
LAC1533_RS06260	type I DNA topoisomerase	GSS_RS00180	type I DNA topoisomerase	Lacidipiscis_RS03535	type I DNA topoisomerase
LAC1533_RS06265	tyrosine recombinase XerC	GSS_RS00185	tyrosine recombinase XerC	Lacidipiscis_RS03530	tyrosine recombinase XerC
LAC1533_RS06270	HslU--HslV peptidase proteolytic subunit	GSS_RS00190	HslU--HslV peptidase proteolytic subunit	Lacidipiscis_RS03525	HslU--HslV peptidase proteolytic subunit
LAC1533_RS06275	ATP-dependent protease ATPase subunit HslU	GSS_RS00195	ATP-dependent protease ATPase subunit HslU	Lacidipiscis_RS03520	ATP-dependent protease ATPase subunit HslU
LAC1533_RS06280	aldose 1-epimerase family protein	GSS_RS00200	aldose 1-epimerase family protein	Lacidipiscis_RS03515	aldose 1-epimerase family protein
LAC1533_RS06285	glycerol-3-phosphate acyltransferase	GSS_RS00205	glycerol-3-phosphate acyltransferase	Lacidipiscis_RS03510	glycerol-3-phosphate acyltransferase
LAC1533_RS06290	DNA topoisomerase IV subunit B	GSS_RS11985	DNA topoisomerase IV subunit B	Lacidipiscis_RS03505	DNA topoisomerase IV subunit B
LAC1533_RS06295	DNA topoisomerase IV subunit A	GSS_RS11995	hypothetical protein	Lacidipiscis_RS03500	DNA topoisomerase IV subunit A
LAC1533_RS06300	hypothetical protein	GSS_RS00225	hypothetical protein	Lacidipiscis_RS03495	hypothetical protein
LAC1533_RS06310	signal peptidase I	GSS_RS00235	signal peptidase I	Lacidipiscis_RS01700	signal peptidase I
LAC1533_RS06315	hypothetical protein	GSS_RS00240	hypothetical protein	Lacidipiscis_RS01705	hypothetical protein
LAC1533_RS06320	xylose isomerase	GSS_RS00245	xylose isomerase	Lacidipiscis_RS01710	xylose isomerase
LAC1533_RS06325	DegV family protein	GSS_RS00250	DegV family protein	Lacidipiscis_RS01715	DegV family protein
LAC1533_RS06330	MarR family transcriptional regulator	GSS_RS00255	MarR family transcriptional regulator	Lacidipiscis_RS01720	MarR family transcriptional regulator
LAC1533_RS06335	DUF814 domain-containing protein			Lacidipiscis_RS01725	DUF814 domain-containing protein
LAC1533_RS06340	hypothetical protein	GSS_RS00265	hypothetical protein	Lacidipiscis_RS01730	hypothetical protein
LAC1533_RS06350	GNAT family N-acetyltransferase	GSS_RS00275	GNAT family N-acetyltransferase	Lacidipiscis_RS01740	GNAT family N-acetyltransferase
LAC1533_RS06355	glutamate racemase	GSS_RS00280	glutamate racemase	Lacidipiscis_RS01745	glutamate racemase
LAC1533_RS06360	aminotransferase class V-fold PLP-dependent enzyme	GSS_RS00285	aminotransferase class V-fold PLP-dependent enzyme	Lacidipiscis_RS01750	aminotransferase class V-fold PLP-dependent enzyme
LAC1533_RS06365	DeoR/GlpR transcriptional regulator	GSS_RS00290	DeoR/GlpR transcriptional regulator	Lacidipiscis_RS01755	DeoR/GlpR transcriptional regulator
LAC1533_RS06370	manganese-dependent inorganic pyrophosphatase	GSS_RS00295	manganese-dependent inorganic pyrophosphatase	Lacidipiscis_RS01760	manganese-dependent inorganic pyrophosphatase
LAC1533_RS06375	LysR family transcriptional regulator	GSS_RS00300	LysR family transcriptional regulator	Lacidipiscis_RS01765	LysR family transcriptional regulator
LAC1533_RS06385	dihydroorotate dehydrogenase	GSS_RS00320	dihydroorotate dehydrogenase	Lacidipiscis_RS01775	dihydroorotate dehydrogenase
LAC1533_RS06395	carbamoyl phosphate synthase small subunit	GSS_RS00330	carbamoyl-phosphate synthase small subunit	Lacidipiscis_RS01785	carbamoyl phosphate synthase small subunit
LAC1533_RS06400	dihydroorotase	GSS_RS00335	dihydroorotase	Lacidipiscis_RS01790	dihydroorotase
LAC1533_RS06410	uracil permease			Lacidipiscis_RS01800	uracil permease
LAC1533_RS06415	bifunctional pyr operon transcriptional regulator/uracil phosphoribosyltransferase PyrR	GSS_RS00350	bifunctional pyr operon transcriptional regulator/uracil phosphoribosyltransferase PyrR	Lacidipiscis_RS01805	bifunctional pyr operon transcriptional regulator/uracil phosphoribosyltransferase PyrR
LAC1533_RS06420	RluA family pseudouridine synthase	GSS_RS00355	RluA family pseudouridine synthase	Lacidipiscis_RS01810	RluA family pseudouridine synthase
LAC1533_RS06425	signal peptidase II	GSS_RS00360	signal peptidase II	Lacidipiscis_RS01815	signal peptidase II
LAC1533_RS06430	formate--tetrahydrofolate ligase	GSS_RS00365	formate--tetrahydrofolate ligase	Lacidipiscis_RS01820	formate--tetrahydrofolate ligase
LAC1533_RS06435	hypothetical protein	GSS_RS00370	hypothetical protein	Lacidipiscis_RS01825	hypothetical protein
LAC1533_RS06440	class I SAM-dependent RNA methyltransferase			Lacidipiscis_RS01830	class I SAM-dependent RNA methyltransferase
LAC1533_RS06460	cell division regulator GpsB	GSS_RS00380	cell division regulator GpsB	Lacidipiscis_RS01840	cell division regulator GpsB
LAC1533_RS06465	DUF1273 domain-containing protein	GSS_RS12025	DUF1273 domain-containing protein	Lacidipiscis_RS01845	DUF1273 domain-containing protein
LAC1533_RS06470	Holliday junction resolvase RecU	GSS_RS00390	Holliday junction resolvase RecU	Lacidipiscis_RS01850	Holliday junction resolvase RecU
LAC1533_RS06475	carboxypeptidase			Lacidipiscis_RS01855	carboxypeptidase
LAC1533_RS06480	endonuclease III	GSS_RS00410	endonuclease III	Lacidipiscis_RS10195	endonuclease III
LAC1533_RS06485	DnaD domain protein	GSS_RS00415	DnaD domain protein	Lacidipiscis_RS10200	DnaD domain protein
LAC1533_RS06490	asparagine--tRNA ligase	GSS_RS00420	asparagine--tRNA ligase	Lacidipiscis_RS10205	asparagine--tRNA ligase
LAC1533_RS06495	pyridoxal phosphate-dependent aminotransferase	GSS_RS00425	pyridoxal phosphate-dependent aminotransferase	Lacidipiscis_RS10210	pyridoxal phosphate-dependent aminotransferase
LAC1533_RS06500	hypothetical protein	GSS_RS00430	hypothetical protein	Lacidipiscis_RS10215	hypothetical protein
LAC1533_RS06505	hypothetical protein	GSS_RS13620	hypothetical protein	Lacidipiscis_RS10220	hypothetical protein
LAC1533_RS06510	mevalonate kinase	GSS_RS00440	mevalonate kinase	Lacidipiscis_RS10225	mevalonate kinase
LAC1533_RS06515	diphosphomevalonate decarboxylase			Lacidipiscis_RS10230	diphosphomevalonate decarboxylase
LAC1533_RS06520	phosphomevalonate kinase	GSS_RS00450	phosphomevalonate kinase	Lacidipiscis_RS10235	phosphomevalonate kinase
LAC1533_RS06525	type 2 isopentenyl-diphosphate Delta-isomerase	GSS_RS00455	type 2 isopentenyl-diphosphate Delta-isomerase	Lacidipiscis_RS10240	type 2 isopentenyl-diphosphate Delta-isomerase
LAC1533_RS06530	RNA methyltransferase	GSS_RS00460	23S rRNA methyltransferase	Lacidipiscis_RS10245	RNA methyltransferase
LAC1533_RS06535	hypothetical protein	GSS_RS13625	hypothetical protein	Lacidipiscis_RS10250	hypothetical protein
LAC1533_RS06540	metal-sulfur cluster assembly factor	GSS_RS00470	metal-sulfur cluster assembly factor	Lacidipiscis_RS10255	metal-sulfur cluster assembly factor
LAC1533_RS06545	S9 family serine peptidase	GSS_RS00475	S9 family serine peptidase	Lacidipiscis_RS10260	S9 family serine peptidase
LAC1533_RS06550	Cof-type HAD-IIB family hydrolase	GSS_RS00485	Cof-type HAD-IIB family hydrolase	Lacidipiscis_RS10265	Cof-type HAD-IIB family hydrolase
LAC1533_RS06555	diaminopimelate decarboxylase	GSS_RS00490	diaminopimelate decarboxylase	Lacidipiscis_RS10270	diaminopimelate decarboxylase
LAC1533_RS06560	dipeptidase			Lacidipiscis_RS10275	dipeptidase
LAC1533_RS06565	hypothetical protein	GSS_RS13630	hypothetical protein	Lacidipiscis_RS10280	hypothetical protein
LAC1533_RS06570 IDENTICAL PARALOGS LAC1533_RS07645 IDENTICAL PARALOGS LAC1533_RS07685 IDENTICAL PARALOGS LAC1533_RS11435	group II intron reverse transcriptase/maturase
LAC1533_RS06580	elongation factor Ts	GSS_RS00505	elongation factor Ts	Lacidipiscis_RS10285	elongation factor Ts
LAC1533_RS06585	30S ribosomal protein S2	GSS_RS00510	30S ribosomal protein S2	Lacidipiscis_RS10290	30S ribosomal protein S2
LAC1533_RS06590	lactate dehydrogenase	GSS_RS00515	lactate dehydrogenase	Lacidipiscis_RS10295	lactate dehydrogenase
LAC1533_RS06595	GIY-YIG nuclease family protein	GSS_RS00520	GIY-YIG nuclease family protein	Lacidipiscis_RS10300	GIY-YIG nuclease family protein
LAC1533_RS06600	tRNA1(Val) (adenine(37)-N6)-methyltransferase			Lacidipiscis_RS10305	tRNA1(Val) (adenine(37)-N6)-methyltransferase
LAC1533_RS06605	1-acyl-sn-glycerol-3-phosphate acyltransferase	GSS_RS00530	1-acyl-sn-glycerol-3-phosphate acyltransferase	Lacidipiscis_RS10310	1-acyl-sn-glycerol-3-phosphate acyltransferase
LAC1533_RS06610	hypothetical protein	GSS_RS00535	hypothetical protein	Lacidipiscis_RS10315	hypothetical protein
LAC1533_RS06615	DUF896 family protein	GSS_RS00540	DUF896 family protein	Lacidipiscis_RS10320	DUF896 family protein
LAC1533_RS06620	transcriptional repressor LexA	GSS_RS00545	transcriptional repressor LexA	Lacidipiscis_RS10325	transcriptional repressor LexA
LAC1533_RS06630	DNA repair protein RecN			Lacidipiscis_RS10330	DNA repair protein RecN
LAC1533_RS06635	ArgR family transcriptional regulator	GSS_RS00555	ArgR family transcriptional regulator	Lacidipiscis_RS10335	ArgR family transcriptional regulator
LAC1533_RS06640	TlyA family rRNA (cytidine-2-O)-methyltransferase	GSS_RS00560	TlyA family rRNA (cytidine-2-O)-methyltransferase	Lacidipiscis_RS10340	TlyA family rRNA (cytidine-2-O)-methyltransferase
LAC1533_RS06645	polyprenyl synthetase family protein	GSS_RS00565	polyprenyl synthetase family protein	Lacidipiscis_RS10345	polyprenyl synthetase family protein
LAC1533_RS06650	exodeoxyribonuclease VII small subunit	GSS_RS00570	exodeoxyribonuclease VII small subunit	Lacidipiscis_RS10350	exodeoxyribonuclease VII small subunit
LAC1533_RS06655	exodeoxyribonuclease VII large subunit	GSS_RS00575	exodeoxyribonuclease VII large subunit	Lacidipiscis_RS10355	exodeoxyribonuclease VII large subunit
LAC1533_RS06660	bifunctional methylenetetrahydrofolate dehydrogenase/methenyltetrahydrofolate cyclohydrolase FolD	GSS_RS00580	bifunctional methylenetetrahydrofolate dehydrogenase/methenyltetrahydrofolate cyclohydrolase	Lacidipiscis_RS10360	bifunctional methylenetetrahydrofolate dehydrogenase/methenyltetrahydrofolate cyclohydrolase FolD
LAC1533_RS06665	transcription antitermination factor NusB	GSS_RS00585	transcription antitermination factor NusB	Lacidipiscis_RS10365	transcription antitermination factor NusB
LAC1533_RS06670	Asp23/Gls24 family envelope stress response protein	GSS_RS00590	Asp23/Gls24 family envelope stress response protein	Lacidipiscis_RS10370	Asp23/Gls24 family envelope stress response protein
LAC1533_RS06675	elongation factor P	GSS_RS00595	elongation factor P	Lacidipiscis_RS10375	elongation factor P
LAC1533_RS06680	aminopeptidase P family protein
LAC1533_RS06685	50S ribosomal protein L27	GSS_RS00605	50S ribosomal protein L27	Lacidipiscis_RS10385	50S ribosomal protein L27
LAC1533_RS06690	ribosomal-processing cysteine protease Prp	GSS_RS00610	ribosomal-processing cysteine protease Prp	Lacidipiscis_RS10390	ribosomal-processing cysteine protease Prp
LAC1533_RS06695	50S ribosomal protein L21	GSS_RS00615	50S ribosomal protein L21	Lacidipiscis_RS10395	50S ribosomal protein L21
LAC1533_RS06705	1-acyl-sn-glycerol-3-phosphate acyltransferase	GSS_RS12100	1-acyl-sn-glycerol-3-phosphate acyltransferase	Lacidipiscis_RS10405	1-acyl-sn-glycerol-3-phosphate acyltransferase
LAC1533_RS06720	hypothetical protein	GSS_RS00920	hypothetical protein	Lacidipiscis_RS08600	hypothetical protein
LAC1533_RS06725	hypothetical protein	GSS_RS00930	hypothetical protein	Lacidipiscis_RS02095	hypothetical protein
LAC1533_RS06730	hypothetical protein	GSS_RS00935	hypothetical protein	Lacidipiscis_RS02100	hypothetical protein
LAC1533_RS06735	exonuclease SbcC	GSS_RS00940	hypothetical protein	Lacidipiscis_RS02105	hypothetical protein
LAC1533_RS06740	hypothetical protein	GSS_RS00950	hypothetical protein	Lacidipiscis_RS02110	hypothetical protein
LAC1533_RS06745	hydroxymethylglutaryl-CoA synthase			Lacidipiscis_RS02115	hydroxymethylglutaryl-CoA synthase
LAC1533_RS06755	acylphosphatase	GSS_RS00960	acylphosphatase	Lacidipiscis_RS02120	acylphosphatase
LAC1533_RS06760	OxaA precursor			Lacidipiscis_RS02125	OxaA precursor
LAC1533_RS06765	sensor histidine kinase			Lacidipiscis_RS02130	sensor histidine kinase
LAC1533_RS06770	DNA-binding response regulator	GSS_RS00975	DNA-binding response regulator	Lacidipiscis_RS02135	DNA-binding response regulator
LAC1533_RS06780	phosphogluconate dehydrogenase (NADP(+)-dependent, decarboxylating)	GSS_RS00980	phosphogluconate dehydrogenase (NADP(+)-dependent, decarboxylating)	Lacidipiscis_RS02140	phosphogluconate dehydrogenase (NADP(+)-dependent, decarboxylating)
LAC1533_RS06785	ATP-dependent Clp protease ATP-binding subunit ClpX			Lacidipiscis_RS02145	ATP-dependent Clp protease ATP-binding subunit ClpX
LAC1533_RS06790	trigger factor	GSS_RS12125	trigger factor	Lacidipiscis_RS02150	trigger factor
LAC1533_RS06795	elongation factor Tu	GSS_RS01000	elongation factor Tu	Lacidipiscis_RS02155	elongation factor Tu
LAC1533_RS06800	hypothetical protein	GSS_RS01015	hypothetical protein	Lacidipiscis_RS02160	hypothetical protein
LAC1533_RS06805	ribonuclease J	GSS_RS01020	RNase J family beta-CASP ribonuclease	Lacidipiscis_RS02165	ribonuclease J
LAC1533_RS06810	4-hydroxy-tetrahydrodipicolinate synthase	GSS_RS01025	4-hydroxy-tetrahydrodipicolinate synthase	Lacidipiscis_RS02170	4-hydroxy-tetrahydrodipicolinate synthase
LAC1533_RS06815	aspartate-semialdehyde dehydrogenase	GSS_RS01030	aspartate-semialdehyde dehydrogenase	Lacidipiscis_RS02175	aspartate-semialdehyde dehydrogenase
LAC1533_RS06825	30S ribosomal protein S15	GSS_RS01045	30S ribosomal protein S15	Lacidipiscis_RS02185	30S ribosomal protein S15
LAC1533_RS06830	30S ribosomal protein S20	GSS_RS01050	30S ribosomal protein S20	Lacidipiscis_RS02195	30S ribosomal protein S20
LAC1533_RS06835	DNA polymerase III subunit delta	GSS_RS13470	DNA polymerase III subunit delta	Lacidipiscis_RS02200	DNA polymerase III subunit delta
LAC1533_RS06840	DNA internalization-related competence protein ComEC/Rec2	GSS_RS12145	MBL fold metallo-hydrolase	Lacidipiscis_RS02205	DNA internalization-related competence protein ComEC/Rec2
LAC1533_RS06845	ComE operon protein 2	GSS_RS01070	ComE operon protein 2	Lacidipiscis_RS02210	ComE operon protein 2
LAC1533_RS06850	ComE operon protein 1	GSS_RS01075	ComE operon protein 1	Lacidipiscis_RS02215	ComE operon protein 1
LAC1533_RS06855	PDZ domain-containing protein	GSS_RS01080	PDZ domain-containing protein	Lacidipiscis_RS02220	PDZ domain-containing protein
LAC1533_RS06860	pantetheine-phosphate adenylyltransferase	GSS_RS01090	pantetheine-phosphate adenylyltransferase	Lacidipiscis_RS02225	pantetheine-phosphate adenylyltransferase
LAC1533_RS06865	16S rRNA (guanine(966)-N(2))-methyltransferase RsmD			Lacidipiscis_RS02230	16S rRNA (guanine(966)-N(2))-methyltransferase RsmD
LAC1533_RS06870	DUF2129 domain-containing protein	GSS_RS01100	DUF2129 domain-containing protein	Lacidipiscis_RS02235	DUF2129 domain-containing protein
LAC1533_RS06875	pyruvate carboxylase	GSS_RS12155	pyruvate carboxylase	Lacidipiscis_RS02240	pyruvate carboxylase
LAC1533_RS06880	FtsW/RodA/SpoVE family cell cycle protein	GSS_RS01115	FtsW/RodA/SpoVE family cell cycle protein	Lacidipiscis_RS02245	FtsW/RodA/SpoVE family cell cycle protein
LAC1533_RS06885	DUF1507 domain-containing protein	GSS_RS01120	DUF1507 domain-containing protein	Lacidipiscis_RS02250	DUF1507 domain-containing protein
LAC1533_RS06890	IS982 family transposase
LAC1533_RS06895	translational GTPase TypA			Lacidipiscis_RS05235	translational GTPase TypA
LAC1533_RS06900	inositol monophosphatase family protein	GSS_RS01130	inositol monophosphatase family protein	Lacidipiscis_RS05230	inositol monophosphatase family protein
LAC1533_RS06905	hypothetical protein	GSS_RS01135	hypothetical protein	Lacidipiscis_RS05225	hypothetical protein
LAC1533_RS06910	lactate dehydrogenase	GSS_RS01140	malate dehydrogenase	Lacidipiscis_RS05220	malate dehydrogenase
LAC1533_RS06915	IS30 family transposase
LAC1533_RS06920	peptide deformylase	GSS_RS01155	peptide deformylase	Lacidipiscis_RS03290	peptide deformylase
LAC1533_RS06925	hypothetical protein	GSS_RS01160	hypothetical protein	Lacidipiscis_RS03295	hypothetical protein
LAC1533_RS06935	DUF1447 domain-containing protein	GSS_RS01165	DUF1447 domain-containing protein	Lacidipiscis_RS03310	DUF1447 domain-containing protein
LAC1533_RS06940	ribonuclease J	GSS_RS01170	ribonuclease J	Lacidipiscis_RS03315	ribonuclease J
LAC1533_RS06945	transcriptional regulator	GSS_RS01175	transcriptional regulator	Lacidipiscis_RS03320	transcriptional regulator
LAC1533_RS06955	ATP-dependent RecD-like DNA helicase	GSS_RS01180	ATP-dependent RecD-like DNA helicase	Lacidipiscis_RS03325	ATP-dependent RecD-like DNA helicase
LAC1533_RS06960	tetratricopeptide repeat protein	GSS_RS01185	tetratricopeptide repeat protein	Lacidipiscis_RS03330	tetratricopeptide repeat protein
LAC1533_RS06965	histidine phosphatase family protein	GSS_RS01190	histidine phosphatase family protein	Lacidipiscis_RS03335	histidine phosphatase family protein
LAC1533_RS06970	tRNA 2-thiouridine(34) synthase MnmA	GSS_RS01195	tRNA 2-thiouridine(34) synthase MnmA	Lacidipiscis_RS03340	tRNA 2-thiouridine(34) synthase MnmA
LAC1533_RS06975	cysteine desulfurase	GSS_RS01200	cysteine desulfurase	Lacidipiscis_RS03345	cysteine desulfurase
LAC1533_RS06980	cysteine desulfurase			Lacidipiscis_RS03350	cysteine desulfurase
LAC1533_RS06985	5-methylthioadenosine/adenosylhomocysteine nucleosidase	GSS_RS01210	5-methylthioadenosine/adenosylhomocysteine nucleosidase	Lacidipiscis_RS03355	5-methylthioadenosine/adenosylhomocysteine nucleosidase
LAC1533_RS06990	hypothetical protein	GSS_RS01215	hypothetical protein	Lacidipiscis_RS03360	hypothetical protein
LAC1533_RS06995	NUDIX hydrolase	GSS_RS01220	NUDIX hydrolase	Lacidipiscis_RS03365	NUDIX hydrolase
LAC1533_RS07000	diaminopimelate epimerase	GSS_RS12170	diaminopimelate epimerase	Lacidipiscis_RS03370	diaminopimelate epimerase
LAC1533_RS07005	isoleucine--tRNA ligase	GSS_RS01230	isoleucine--tRNA ligase	Lacidipiscis_RS03375	isoleucine--tRNA ligase
LAC1533_RS07010	DivIVA domain-containing protein	GSS_RS01235	DivIVA domain-containing protein	Lacidipiscis_RS03380	DivIVA domain-containing protein
LAC1533_RS07015	RNA-binding protein			Lacidipiscis_RS03385	RNA-binding protein
LAC1533_RS07020	YggT family protein	GSS_RS01245	YggT family protein	Lacidipiscis_RS03390	YggT family protein
LAC1533_RS07025	cell division protein SepF	GSS_RS01250	cell division protein SepF	Lacidipiscis_RS03395	cell division protein SepF
LAC1533_RS07030	cell division protein FtsZ	GSS_RS01255	cell division protein FtsZ	Lacidipiscis_RS03400	cell division protein FtsZ
LAC1533_RS07035	cell division protein FtsA	GSS_RS01260	cell division protein FtsA	Lacidipiscis_RS03405	cell division protein FtsA
LAC1533_RS07040	hypothetical protein	GSS_RS13645	hypothetical protein	Lacidipiscis_RS03410	hypothetical protein
LAC1533_RS07045	undecaprenyldiphospho-muramoylpentapeptide beta-N-acetylglucosaminyltransferase			Lacidipiscis_RS03415	undecaprenyldiphospho-muramoylpentapeptide beta-N-acetylglucosaminyltransferase
LAC1533_RS07050	UDP-N-acetylmuramoyl-L-alanine--D-glutamate ligase	GSS_RS01270	UDP-N-acetylmuramoyl-L-alanine--D-glutamate ligase	Lacidipiscis_RS03420	UDP-N-acetylmuramoyl-L-alanine--D-glutamate ligase
LAC1533_RS07055	phospho-N-acetylmuramoyl-pentapeptide- transferase	GSS_RS01275	phospho-N-acetylmuramoyl-pentapeptide- transferase	Lacidipiscis_RS03425	phospho-N-acetylmuramoyl-pentapeptide- transferase
LAC1533_RS07060	PASTA domain-containing protein	GSS_RS01280	PASTA domain-containing protein	Lacidipiscis_RS03430	PASTA domain-containing protein
LAC1533_RS07065	cell division protein FtsL	GSS_RS01285	cell division protein FtsL	Lacidipiscis_RS03435	cell division protein FtsL
LAC1533_RS07070	16S rRNA (cytosine(1402)-N(4))-methyltransferase RsmH	GSS_RS01290	16S rRNA (cytosine(1402)-N(4))-methyltransferase RsmH	Lacidipiscis_RS03440	16S rRNA (cytosine(1402)-N(4))-methyltransferase RsmH
LAC1533_RS07075	transcriptional regulator MraZ	GSS_RS01295	transcriptional regulator MraZ	Lacidipiscis_RS03445	transcriptional regulator MraZ
LAC1533_RS07080	DUF3397 domain-containing protein	GSS_RS01300	DUF3397 domain-containing protein	Lacidipiscis_RS07355	DUF3397 domain-containing protein
LAC1533_RS07090	DUF4044 domain-containing protein	GSS_RS13945	DUF4044 domain-containing protein	Lacidipiscis_RS07360	DUF4044 domain-containing protein
LAC1533_RS07100	alpha/beta hydrolase	GSS_RS01305	alpha/beta hydrolase	Lacidipiscis_RS07365	alpha/beta hydrolase
LAC1533_RS07105	cardiolipin synthase	GSS_RS01310	cardiolipin synthase	Lacidipiscis_RS07370	cardiolipin synthase
LAC1533_RS07110	septum site-determining protein MinD	GSS_RS01320	septum site-determining protein MinD	Lacidipiscis_RS07375	septum site-determining protein MinD
LAC1533_RS07115	cell division inhibitor	GSS_RS01325	cell division inhibitor	Lacidipiscis_RS07380	cell division inhibitor
LAC1533_RS07120	rod shape-determining protein MreD			Lacidipiscis_RS07385	rod shape-determining protein MreD
LAC1533_RS07125	rod shape-determining protein MreC	GSS_RS01335	rod shape-determining protein MreC	Lacidipiscis_RS07390	rod shape-determining protein MreC
LAC1533_RS07130	rod shape-determining protein	GSS_RS01340	rod shape-determining protein	Lacidipiscis_RS07395	rod shape-determining protein
LAC1533_RS07135	cold-shock protein	GSS_RS01345	cold-shock protein	Lacidipiscis_RS07400	cold-shock protein
LAC1533_RS07140	DNA repair protein	GSS_RS01350	DNA repair protein	Lacidipiscis_RS07405	DNA repair protein
LAC1533_RS07145	HAD family phosphatase			Lacidipiscis_RS07410	HAD family phosphatase
LAC1533_RS07150	bifunctional folylpolyglutamate synthase/dihydrofolate synthase	GSS_RS01360	bifunctional folylpolyglutamate synthase/dihydrofolate synthase	Lacidipiscis_RS07415	bifunctional folylpolyglutamate synthase/dihydrofolate synthase
LAC1533_RS07155	valine--tRNA ligase	GSS_RS01365	valine--tRNA ligase	Lacidipiscis_RS07420	valine--tRNA ligase
LAC1533_RS07165	tRNA 4-thiouridine(8) synthase ThiI	GSS_RS01370	tRNA 4-thiouridine(8) synthase ThiI	Lacidipiscis_RS07425	tRNA 4-thiouridine(8) synthase ThiI
LAC1533_RS07170	cysteine desulfurase	GSS_RS01375	cysteine desulfurase	Lacidipiscis_RS07430	cysteine desulfurase
LAC1533_RS07175	septation ring formation regulator EzrA	GSS_RS01380	septation ring formation regulator EzrA	Lacidipiscis_RS07435	septation ring formation regulator EzrA
LAC1533_RS07180	GAF domain-containing protein			Lacidipiscis_RS07440	GAF domain-containing protein
LAC1533_RS07185	30S ribosomal protein S4	GSS_RS01390	30S ribosomal protein S4	Lacidipiscis_RS07445	30S ribosomal protein S4
LAC1533_RS07190	replication-associated recombination protein A	GSS_RS01395	replication-associated recombination protein A	Lacidipiscis_RS07450	replication-associated recombination protein A
LAC1533_RS07195	universal stress protein			Lacidipiscis_RS07455	universal stress protein
LAC1533_RS07200	DNA-3-methyladenine glycosylase I	GSS_RS01405	DNA-3-methyladenine glycosylase I	Lacidipiscis_RS07460	DNA-3-methyladenine glycosylase I
LAC1533_RS07205	aminoglycoside phosphotransferase family protein	GSS_RS01410	aminoglycoside phosphotransferase family protein	Lacidipiscis_RS03460	aminoglycoside phosphotransferase family protein
LAC1533_RS07210	amino acid permease	GSS_RS01415	amino acid permease	Lacidipiscis_RS08405	amino acid permease
LAC1533_RS07215	hypothetical protein
LAC1533_RS07220	hypothetical protein
LAC1533_RS07235	GNAT family acetyltransferase	GSS_RS01420	GNAT family acetyltransferase
LAC1533_RS07240	IS256 family transposase
LAC1533_RS07255	hypothetical protein
LAC1533_RS07260	peptide transporter
LAC1533_RS07265	recombinase family protein
LAC1533_RS07275	immunity protein	GSS_RS14245	immunity protein
LAC1533_RS07290	antitoxin RelB	GSS_RS11150	antitoxin RelB	Lacidipiscis_RS12870	RelB
LAC1533_RS07295	site-specific integrase
LAC1533_RS07300	transcriptional regulator	GSS_RS01425	transcriptional regulator
LAC1533_RS07305	hypothetical protein
LAC1533_RS07325 IDENTICAL PARALOGS LAC1533_RS07420 IDENTICAL PARALOGS LAC1533_RS10240	transposase	GSS_RS11365	transposase
LAC1533_RS07330	hypothetical protein
LAC1533_RS07335	DUF536 domain-containing protein	GSS_RS11750	DUF536 domain-containing protein
LAC1533_RS07340	putative holin-like toxin	GSS_RS14255	putative holin-like toxin
LAC1533_RS07345	LtrC			Lacidipiscis_RS12035	hypothetical protein
LAC1533_RS07350	hypothetical protein			Lacidipiscis_RS12030	hypothetical protein
LAC1533_RS07355	hypothetical protein
LAC1533_RS07360	type IA DNA topoisomerase			Lacidipiscis_RS12025	type IA DNA topoisomerase
LAC1533_RS07365	hypothetical protein
LAC1533_RS07370	conjugal transfer protein			Lacidipiscis_RS01950	hypothetical protein
LAC1533_RS07375	hypothetical protein
LAC1533_RS07380	conjugal transfer protein
LAC1533_RS07385	conjugal transfer protein
LAC1533_RS07390	hypothetical protein
LAC1533_RS07395	IS30 family transposase	GSS_RS11415	IS30 family transposase
LAC1533_RS07400	hypothetical protein
LAC1533_RS07405	hypothetical protein
LAC1533_RS07410	peptidoglycan endopeptidase
LAC1533_RS07435	Fe-S cluster assembly protein SufB	GSS_RS10410	Fe-S cluster assembly protein SufB	Lacidipiscis_RS03120	Fe-S cluster assembly protein SufB
LAC1533_RS07440	SUF system NifU family Fe-S cluster assembly protein	GSS_RS10415	SUF system NifU family Fe-S cluster assembly protein	Lacidipiscis_RS03125	SUF system NifU family Fe-S cluster assembly protein
LAC1533_RS07445	cysteine desulfurase	GSS_RS10420	cysteine desulfurase	Lacidipiscis_RS03130	cysteine desulfurase
LAC1533_RS07450	Fe-S cluster assembly protein SufD	GSS_RS10425	Fe-S cluster assembly protein SufD	Lacidipiscis_RS03135	Fe-S cluster assembly protein SufD
LAC1533_RS07455	Fe-S cluster assembly ATPase SufC	GSS_RS10430	Fe-S cluster assembly ATPase SufC	Lacidipiscis_RS03140	Fe-S cluster assembly ATPase SufC
LAC1533_RS07460	arsenate reductase family protein	GSS_RS10435	arsenate reductase family protein	Lacidipiscis_RS03145	arsenate reductase family protein
LAC1533_RS07465	rod shape-determining protein RodA	GSS_RS10445	rod shape-determining protein	Lacidipiscis_RS03150	rod shape-determining protein RodA
LAC1533_RS07470	DUF2969 domain-containing protein	GSS_RS10450	DUF2969 domain-containing protein	Lacidipiscis_RS03155	DUF2969 domain-containing protein
LAC1533_RS07475	membrane protein insertion efficiency factor YidD	GSS_RS10455	membrane protein insertion efficiency factor YidD	Lacidipiscis_RS03160	membrane protein insertion efficiency factor YidD
LAC1533_RS07480	rod shape-determining protein	GSS_RS10460	rod shape-determining protein	Lacidipiscis_RS03165	rod shape-determining protein
LAC1533_RS07485	UDP-N-acetylglucosamine 1-carboxyvinyltransferase	GSS_RS10465	UDP-N-acetylglucosamine 1-carboxyvinyltransferase	Lacidipiscis_RS03170	UDP-N-acetylglucosamine 1-carboxyvinyltransferase
LAC1533_RS07490	membrane protein	GSS_RS10470	membrane protein	Lacidipiscis_RS03175	membrane protein
LAC1533_RS07500	F0F1 ATP synthase subunit epsilon	GSS_RS10475	F0F1 ATP synthase subunit epsilon	Lacidipiscis_RS06965	F0F1 ATP synthase subunit epsilon
LAC1533_RS07505	F0F1 ATP synthase subunit beta	GSS_RS10480	F0F1 ATP synthase subunit beta	Lacidipiscis_RS06960	F0F1 ATP synthase subunit beta
LAC1533_RS07510	F0F1 ATP synthase subunit gamma	GSS_RS10485	F0F1 ATP synthase subunit gamma	Lacidipiscis_RS06955	F0F1 ATP synthase subunit gamma
LAC1533_RS07515	F0F1 ATP synthase subunit alpha	GSS_RS10490	F0F1 ATP synthase subunit alpha	Lacidipiscis_RS06950	F0F1 ATP synthase subunit alpha
LAC1533_RS07520	F0F1 ATP synthase subunit delta	GSS_RS10500	F0F1 ATP synthase subunit delta	Lacidipiscis_RS06945	F0F1 ATP synthase subunit delta
LAC1533_RS07525	ATP synthase F0 subunit B	GSS_RS10505	ATP synthase F0 subunit B	Lacidipiscis_RS06940	ATP synthase F0 subunit B
LAC1533_RS07530	F0F1 ATP synthase subunit C	GSS_RS10510	F0F1 ATP synthase subunit C	Lacidipiscis_RS06935	F0F1 ATP synthase subunit C
LAC1533_RS07535	F0F1 ATP synthase subunit A	GSS_RS10515	F0F1 ATP synthase subunit A	Lacidipiscis_RS06930	F0F1 ATP synthase subunit A
LAC1533_RS07540	uracil phosphoribosyltransferase	GSS_RS10520	uracil phosphoribosyltransferase	Lacidipiscis_RS06925	uracil phosphoribosyltransferase
LAC1533_RS07545	threonylcarbamoyl-AMP synthase	GSS_RS10525	threonylcarbamoyl-AMP synthase	Lacidipiscis_RS06920	threonylcarbamoyl-AMP synthase
LAC1533_RS07550	peptide chain release factor N(5)-glutamine methyltransferase	GSS_RS10530	peptide chain release factor N(5)-glutamine methyltransferase	Lacidipiscis_RS06915	peptide chain release factor N(5)-glutamine methyltransferase
LAC1533_RS07555	peptide chain release factor 1			Lacidipiscis_RS06910	peptide chain release factor 1
LAC1533_RS07560	thymidine kinase	GSS_RS10540	thymidine kinase	Lacidipiscis_RS06905	thymidine kinase
LAC1533_RS07565	DUF1727 domain-containing protein	GSS_RS10545	DUF1727 domain-containing protein	Lacidipiscis_RS06895	DUF1727 domain-containing protein
LAC1533_RS07570	glutamine amidotransferase	GSS_RS10550	cobyric acid synthase	Lacidipiscis_RS06890	glutamine amidotransferase
LAC1533_RS07585	mannose-6-phosphate isomerase, class I	GSS_RS10555	mannose-6-phosphate isomerase, class I	Lacidipiscis_RS06885	mannose-6-phosphate isomerase, class I
LAC1533_RS07590	transposase
LAC1533_RS07595	hypothetical protein	GSS_RS10565	hypothetical protein	Lacidipiscis_RS06880	hypothetical protein
LAC1533_RS07600	histidine phosphatase family protein	GSS_RS10570	histidine phosphatase family protein	Lacidipiscis_RS06875	histidine phosphatase family protein
LAC1533_RS07605	hypothetical protein	GSS_RS10575	hypothetical protein	Lacidipiscis_RS06870	hypothetical protein
LAC1533_RS07610	amino acid ABC transporter ATP-binding protein	GSS_RS10580	amino acid ABC transporter ATP-binding protein
LAC1533_RS07635	group II intron reverse transcriptase/maturase
LAC1533_RS07660	hypothetical protein	GSS_RS11245	hypothetical protein	Lacidipiscis_RS06685	hypothetical protein
LAC1533_RS07670	XTP/dITP diphosphatase	GSS_RS11255	XTP/dITP diphosphatase	Lacidipiscis_RS06675	XTP/dITP diphosphatase
LAC1533_RS07675	DUF2507 domain-containing protein	GSS_RS11260	DUF2507 domain-containing protein	Lacidipiscis_RS06670	DUF2507 domain-containing protein
LAC1533_RS07695	endonuclease MutS2	GSS_RS09760	endonuclease MutS2	Lacidipiscis_RS06665	endonuclease MutS2
LAC1533_RS07700	CvpA family protein	GSS_RS09755	CvpA family protein	Lacidipiscis_RS06660	CvpA family protein
LAC1533_RS07705	cell division protein ZapA	GSS_RS09750	cell division protein ZapA	Lacidipiscis_RS06655	cell division protein ZapA
LAC1533_RS07710	DUF1292 domain-containing protein	GSS_RS09745	DUF1292 domain-containing protein	Lacidipiscis_RS06225	DUF1292 domain-containing protein
LAC1533_RS07715	Holliday junction resolvase RuvX	GSS_RS09740	Holliday junction resolvase RuvX	Lacidipiscis_RS06230	Holliday junction resolvase RuvX
LAC1533_RS07720	IreB family regulatory phosphoprotein	GSS_RS09735	IreB family regulatory phosphoprotein	Lacidipiscis_RS06235	IreB family regulatory phosphoprotein
LAC1533_RS07725	alanine--tRNA ligase	GSS_RS09725	alanine--tRNA ligase	Lacidipiscis_RS06240	alanine--tRNA ligase
LAC1533_RS07730	ATP-dependent helicase	GSS_RS09720	ATP-dependent helicase	Lacidipiscis_RS06245	ATP-dependent helicase
LAC1533_RS07735	bifunctional oligoribonuclease/PAP phosphatase NrnA	GSS_RS09715	bifunctional oligoribonuclease/PAP phosphatase NrnA	Lacidipiscis_RS06250	bifunctional oligoribonuclease/PAP phosphatase NrnA
LAC1533_RS07740	DNA polymerase IV	GSS_RS09710	DNA polymerase IV	Lacidipiscis_RS13155	DNA polymerase IV
LAC1533_RS07745	glucose-6-phosphate dehydrogenase			Lacidipiscis_RS13150	glucose-6-phosphate dehydrogenase
LAC1533_RS07750	enoyl-[acyl-carrier-protein] reductase FabI	GSS_RS09690	enoyl-[acyl-carrier-protein] reductase FabI	Lacidipiscis_RS13145	enoyl-[acyl-carrier-protein] reductase FabI
LAC1533_RS07755	acetyl-CoA carboxylase carboxyl transferase subunit alpha	GSS_RS09685	acetyl-CoA carboxylase carboxyl transferase subunit alpha	Lacidipiscis_RS13140	acetyl-CoA carboxylase carboxyl transferase subunit alpha
LAC1533_RS07760	acetyl-CoA carboxylase carboxyltransferase subunit beta	GSS_RS09680	acetyl-CoA carboxylase carboxyltransferase subunit beta	Lacidipiscis_RS13135	acetyl-CoA carboxylase carboxyltransferase subunit beta
LAC1533_RS07765	acetyl-CoA carboxylase biotin carboxylase subunit	GSS_RS09675	acetyl-CoA carboxylase biotin carboxylase subunit	Lacidipiscis_RS13130	acetyl-CoA carboxylase biotin carboxylase subunit
LAC1533_RS07770	3-hydroxyacyl-[acyl-carrier-protein] dehydratase FabZ	GSS_RS09670	3-hydroxyacyl-[acyl-carrier-protein] dehydratase FabZ	Lacidipiscis_RS13125	3-hydroxyacyl-[acyl-carrier-protein] dehydratase FabZ
LAC1533_RS07775	acetyl-CoA carboxylase biotin carboxyl carrier protein	GSS_RS09665	acetyl-CoA carboxylase biotin carboxyl carrier protein	Lacidipiscis_RS13120	acetyl-CoA carboxylase biotin carboxyl carrier protein
LAC1533_RS07780	beta-ketoacyl-[acyl-carrier-protein] synthase II	GSS_RS09660	beta-ketoacyl-[acyl-carrier-protein] synthase II	Lacidipiscis_RS13115	beta-ketoacyl-[acyl-carrier-protein] synthase II
LAC1533_RS07785	hypothetical protein			Lacidipiscis_RS13110	hypothetical protein
LAC1533_RS07790	3-oxoacyl-[acyl-carrier-protein] reductase	GSS_RS09655	3-oxoacyl-[acyl-carrier-protein] reductase	Lacidipiscis_RS13105	3-oxoacyl-[acyl-carrier-protein] reductase
LAC1533_RS07795	ACP S-malonyltransferase	GSS_RS09650	ACP S-malonyltransferase	Lacidipiscis_RS13100	ACP S-malonyltransferase
LAC1533_RS07800	acyl carrier protein	GSS_RS09645	acyl carrier protein	Lacidipiscis_RS13095	acyl carrier protein
LAC1533_RS07805	ketoacyl-ACP synthase III	GSS_RS09640	ketoacyl-ACP synthase III	Lacidipiscis_RS13090	ketoacyl-ACP synthase III
LAC1533_RS07810	MarR family transcriptional regulator	GSS_RS09635	MarR family transcriptional regulator	Lacidipiscis_RS13085	MarR family transcriptional regulator
LAC1533_RS07815	3-hydroxyacyl-[acyl-carrier-protein] dehydratase FabZ	GSS_RS09630	3-hydroxyacyl-[acyl-carrier-protein] dehydratase FabZ	Lacidipiscis_RS13080	3-hydroxyacyl-[acyl-carrier-protein] dehydratase FabZ
LAC1533_RS07820	thiol peroxidase	GSS_RS09625	thiol peroxidase	Lacidipiscis_RS13075	thiol peroxidase
LAC1533_RS07825	preprotein translocase subunit YajC	GSS_RS09620	preprotein translocase subunit YajC	Lacidipiscis_RS07910	preprotein translocase subunit YajC
LAC1533_RS07830	tRNA guanosine(34) transglycosylase Tgt	GSS_RS09615	tRNA guanosine(34) transglycosylase Tgt	Lacidipiscis_RS07905	tRNA guanosine(34) transglycosylase Tgt
LAC1533_RS07835	hypothetical protein
LAC1533_RS07840	tRNA preQ1(34) S-adenosylmethionine ribosyltransferase-isomerase QueA	GSS_RS09605	tRNA preQ1(34) S-adenosylmethionine ribosyltransferase-isomerase QueA	Lacidipiscis_RS07900	tRNA preQ1(34) S-adenosylmethionine ribosyltransferase-isomerase QueA
LAC1533_RS07845	Holliday junction branch migration DNA helicase RuvB	GSS_RS09600	Holliday junction branch migration DNA helicase RuvB	Lacidipiscis_RS07895	Holliday junction branch migration DNA helicase RuvB
LAC1533_RS07850	Holliday junction branch migration protein RuvA	GSS_RS09595	Holliday junction branch migration protein RuvA	Lacidipiscis_RS07890	Holliday junction branch migration protein RuvA
LAC1533_RS07855	DNA mismatch repair endonuclease MutL	GSS_RS09590	DNA mismatch repair endonuclease MutL	Lacidipiscis_RS07885	DNA mismatch repair endonuclease MutL
LAC1533_RS07860	DNA mismatch repair protein MutS	GSS_RS09585	DNA mismatch repair protein MutS	Lacidipiscis_RS07880	DNA mismatch repair protein MutS
LAC1533_RS07865	TIGR00282 family metallophosphoesterase			Lacidipiscis_RS07875	TIGR00282 family metallophosphoesterase
LAC1533_RS07870	ribonuclease Y	GSS_RS09575	ribonuclease Y	Lacidipiscis_RS07870	ribonuclease Y
LAC1533_RS07875	recombinase RecA	GSS_RS09570	recombinase RecA	Lacidipiscis_RS07865	recombinase RecA
LAC1533_RS07880	competence/damage-inducible protein A	GSS_RS09565	competence/damage-inducible protein A	Lacidipiscis_RS07860	competence/damage-inducible protein A
LAC1533_RS07885	CDP-diacylglycerol--glycerol-3-phosphate 3-phosphatidyltransferase	GSS_RS09555	CDP-diacylglycerol--glycerol-3-phosphate 3-phosphatidyltransferase	Lacidipiscis_RS01515	CDP-diacylglycerol--glycerol-3-phosphate 3-phosphatidyltransferase
LAC1533_RS07890	DUF4115 domain-containing protein	GSS_RS13160	DUF4115 domain-containing protein	Lacidipiscis_RS01520	DUF4115 domain-containing protein
LAC1533_RS07895	KR domain-containing protein	GSS_RS09545	KR domain-containing protein	Lacidipiscis_RS01525	KR domain-containing protein
LAC1533_RS07900	insulinase family protein			Lacidipiscis_RS01530	insulinase family protein
LAC1533_RS07905	insulinase family protein	GSS_RS09535	insulinase family protein	Lacidipiscis_RS01535	insulinase family protein
LAC1533_RS07910	DNA translocase FtsK	GSS_RS09530	DNA translocase FtsK	Lacidipiscis_RS01540	DNA translocase FtsK
LAC1533_RS07915	tRNA (cytidine(34)-2-O)-methyltransferase	GSS_RS09525	tRNA (cytidine(34)-2-O)-methyltransferase	Lacidipiscis_RS01545	tRNA (cytidine(34)-2-O)-methyltransferase
LAC1533_RS07920	methyltransferase domain-containing protein	GSS_RS09520	methyltransferase domain-containing protein	Lacidipiscis_RS01550	methyltransferase domain-containing protein
LAC1533_RS07925	aminoacyl-tRNA deacylase	GSS_RS09515	transcriptional regulator	Lacidipiscis_RS01555	aminoacyl-tRNA deacylase
LAC1533_RS07935	GMP reductase	GSS_RS09510	GMP reductase	Lacidipiscis_RS10030	GMP reductase
LAC1533_RS07940	PTS glucose transporter subunit IIA	GSS_RS09505	PTS glucose transporter subunit IIA	Lacidipiscis_RS10025	PTS glucose transporter subunit IIA
LAC1533_RS07945	lactonase family protein	GSS_RS09500	lactonase family protein	Lacidipiscis_RS10020	lactonase family protein
LAC1533_RS07950	copper homeostasis protein CutC	GSS_RS09495	copper homeostasis protein CutC	Lacidipiscis_RS10015	copper homeostasis protein CutC
LAC1533_RS07965	group II intron reverse transcriptase/maturase
LAC1533_RS07970	UDP-glucose--hexose-1-phosphate uridylyltransferase	GSS_RS09485	galactose-1-phosphate uridylyltransferase	Lacidipiscis_RS10010	UDP-glucose--hexose-1-phosphate uridylyltransferase
LAC1533_RS07975	galactokinase	GSS_RS09480	galactokinase	Lacidipiscis_RS10005	galactokinase
LAC1533_RS07980	LacI family DNA-binding transcriptional regulator	GSS_RS09475	LacI family DNA-binding transcriptional regulator	Lacidipiscis_RS10000	LacI family DNA-binding transcriptional regulator
LAC1533_RS07985	magnesium transporter	GSS_RS09470	magnesium transporter	Lacidipiscis_RS09995	magnesium transporter
LAC1533_RS07990	RluA family pseudouridine synthase	GSS_RS09465	RluA family pseudouridine synthase	Lacidipiscis_RS09990	RluA family pseudouridine synthase
LAC1533_RS07995	NAD kinase	GSS_RS09460	NAD kinase	Lacidipiscis_RS09985	NAD kinase
LAC1533_RS08005	oligoendopeptidase F	GSS_RS09450	oligoendopeptidase F
LAC1533_RS08010	hypothetical protein	GSS_RS13150	putative competence protein/transcription factor	Lacidipiscis_RS04970	hypothetical protein
LAC1533_RS08015	adapter protein MecA	GSS_RS09440	adapter protein MecA	Lacidipiscis_RS04975	adaptor protein MecA
LAC1533_RS08025	transcriptional regulator Spx	GSS_RS09435	transcriptional regulator Spx	Lacidipiscis_RS04980	transcriptional regulator Spx
LAC1533_RS08030	anaerobic ribonucleoside-triphosphate reductase activating protein	GSS_RS13145	anaerobic ribonucleoside-triphosphate reductase activating protein	Lacidipiscis_RS04985	anaerobic ribonucleoside-triphosphate reductase activating protein
LAC1533_RS08035	anaerobic ribonucleoside-triphosphate reductase	GSS_RS09415	anaerobic ribonucleoside-triphosphate reductase	Lacidipiscis_RS04990	anaerobic ribonucleoside-triphosphate reductase
LAC1533_RS08040	XRE family transcriptional regulator	GSS_RS00890	XRE family transcriptional regulator	Lacidipiscis_RS04995	XRE family transcriptional regulator
LAC1533_RS08045	ImmA/IrrE family metallo-endopeptidase	GSS_RS12095	ImmA/IrrE family metallo-endopeptidase	Lacidipiscis_RS07680	ImmA/IrrE family metallo-endopeptidase
LAC1533_RS08050	hypothetical protein			Lacidipiscis_RS07685	hypothetical protein
LAC1533_RS08140	hypothetical protein	GSS_RS05665	hypothetical protein	Lacidipiscis_RS10925	hypothetical protein
LAC1533_RS08145	LTA synthase family protein	GSS_RS05660	LTA synthase family protein	Lacidipiscis_RS10920	LTA synthase family protein
LAC1533_RS08150	DUF1797 domain-containing protein	GSS_RS05655	DUF1797 domain-containing protein	Lacidipiscis_RS10915	DUF1797 domain-containing protein
LAC1533_RS08155	TIGR00374 family protein	GSS_RS05650	UPF0104 family protein	Lacidipiscis_RS03690	TIGR00374 family protein
LAC1533_RS08160	glycosyl transferase	GSS_RS05645	glycosyl transferase	Lacidipiscis_RS03695	glycosyl transferase
LAC1533_RS08165	glycosyltransferase family 4 protein	GSS_RS05640	glycosyltransferase family 4 protein	Lacidipiscis_RS03700	glycosyltransferase family 4 protein
LAC1533_RS08170	phosphoenolpyruvate--protein phosphotransferase	GSS_RS05635	phosphoenolpyruvate--protein phosphotransferase	Lacidipiscis_RS03705	phosphoenolpyruvate--protein phosphotransferase
LAC1533_RS08175	phosphocarrier protein HPr	GSS_RS05630	phosphocarrier protein HPr	Lacidipiscis_RS03710	phosphocarrier protein HPr
LAC1533_RS08180	hypothetical protein	GSS_RS05625	hypothetical protein	Lacidipiscis_RS03850	hypothetical protein
LAC1533_RS08185	ATP-dependent Clp protease ATP-binding subunit	GSS_RS05620	ATP-dependent Clp protease ATP-binding subunit	Lacidipiscis_RS03855	ATP-dependent Clp protease ATP-binding subunit
LAC1533_RS08190	DUF1827 domain-containing protein	GSS_RS05615	DUF1827 domain-containing protein	Lacidipiscis_RS02505	DUF1827 domain-containing protein
LAC1533_RS08195	hypothetical protein	GSS_RS05610	hypothetical protein	Lacidipiscis_RS02510	hypothetical protein
LAC1533_RS08200	peptide chain release factor 3	GSS_RS05605	peptide chain release factor 3	Lacidipiscis_RS02515	peptide chain release factor 3
LAC1533_RS08205	HlyC/CorC family transporter	GSS_RS05600	HlyC/CorC family transporter	Lacidipiscis_RS02520	HlyC/CorC family transporter
LAC1533_RS08210	LysM peptidoglycan-binding domain-containing protein	GSS_RS05595	LysM peptidoglycan-binding domain-containing protein	Lacidipiscis_RS02525	LysM peptidoglycan-binding domain-containing protein
LAC1533_RS08215	NAD(P)H-dependent glycerol-3-phosphate dehydrogenase	GSS_RS05590	NAD(P)H-dependent glycerol-3-phosphate dehydrogenase	Lacidipiscis_RS02530	NAD(P)H-dependent glycerol-3-phosphate dehydrogenase
LAC1533_RS08220	DUF402 domain-containing protein	GSS_RS05585	DUF402 domain-containing protein	Lacidipiscis_RS02535	DUF402 domain-containing protein
LAC1533_RS08225	23S rRNA (uracil(1939)-C(5))-methyltransferase RlmD	GSS_RS05580	23S rRNA (uracil(1939)-C(5))-methyltransferase RlmD	Lacidipiscis_RS02540	23S rRNA (uracil(1939)-C(5))-methyltransferase RlmD
LAC1533_RS08230	recombination regulator RecX	GSS_RS05575	recombination regulator RecX	Lacidipiscis_RS02545	recombination regulator RecX
LAC1533_RS08235	YihY/virulence factor BrkB family protein	GSS_RS05570	YihY/virulence factor BrkB family protein	Lacidipiscis_RS02550	YihY/virulence factor BrkB family protein
LAC1533_RS08240	LysM peptidoglycan-binding domain-containing protein	GSS_RS05565	LysM peptidoglycan-binding domain-containing protein	Lacidipiscis_RS02555	LysM peptidoglycan-binding domain-containing protein
LAC1533_RS08245	UTP--glucose-1-phosphate uridylyltransferase	GSS_RS05560	UTP--glucose-1-phosphate uridylyltransferase	Lacidipiscis_RS02565	UTP--glucose-1-phosphate uridylyltransferase
LAC1533_RS08250	type I methionyl aminopeptidase	GSS_RS05555	type I methionyl aminopeptidase	Lacidipiscis_RS02570	type I methionyl aminopeptidase
LAC1533_RS08255	flavodoxin	GSS_RS05550	flavodoxin	Lacidipiscis_RS02575	flavodoxin
LAC1533_RS08260	GtrA family protein	GSS_RS05545	GtrA family protein	Lacidipiscis_RS02580	GtrA family protein
LAC1533_RS08265	hypothetical protein	GSS_RS05535	membrane protein	Lacidipiscis_RS02585	hypothetical protein
LAC1533_RS08270	UDP-N-acetylglucosamine 2-epimerase (non-hydrolyzing)	GSS_RS05530	UDP-N-acetylglucosamine 2-epimerase (non-hydrolyzing)	Lacidipiscis_RS02590	UDP-N-acetylglucosamine 2-epimerase (non-hydrolyzing)
LAC1533_RS08280	DUF3284 domain-containing protein	GSS_RS05515	DUF3284 domain-containing protein	Lacidipiscis_RS02600	DUF3284 domain-containing protein
LAC1533_RS08285	ATP-dependent helicase	GSS_RS05510	ATP-dependent helicase	Lacidipiscis_RS02605	ATP-dependent helicase
LAC1533_RS08290	gfo/Idh/MocA family oxidoreductase	GSS_RS05505	gfo/Idh/MocA family oxidoreductase	Lacidipiscis_RS02610	gfo/Idh/MocA family oxidoreductase
LAC1533_RS08295	Zn-dependent protease	GSS_RS05500	Zn-dependent protease	Lacidipiscis_RS05815	Zn-dependent protease
LAC1533_RS08300	CvpA family protein	GSS_RS05495	CvpA family protein	Lacidipiscis_RS05810	CvpA family protein
LAC1533_RS08315	phosphate ABC transporter substrate-binding protein	GSS_RS05490	phosphate ABC transporter substrate-binding protein	Lacidipiscis_RS05805	phosphate ABC transporter substrate-binding protein
LAC1533_RS08330	group II intron reverse transcriptase/maturase
LAC1533_RS08340 IDENTICAL PARALOGS LAC1533_RS09310	group II intron reverse transcriptase/maturase
LAC1533_RS08350	DUF4828 domain-containing protein	GSS_RS05485	DUF4828 domain-containing protein	Lacidipiscis_RS05800	DUF4828 domain-containing protein
LAC1533_RS08355	transposase	GSS_RS11480	ISL3 family transposase
LAC1533_RS08360	1,3-propanediol dehydrogenase	GSS_RS05480	1,3-propanediol dehydrogenase	Lacidipiscis_RS05850	1,3-propanediol dehydrogenase
LAC1533_RS08365	ECF transporter S component	GSS_RS05475	ECF transporter S component	Lacidipiscis_RS05845	ECF transporter S component
LAC1533_RS08370	hypothetical protein	GSS_RS05470	hypothetical protein
LAC1533_RS08375	sugar aldolase
LAC1533_RS08380	hypothetical protein
LAC1533_RS08385	PTS galactitol transporter subunit IIC
LAC1533_RS08390	PTS galactitol transporter subunit IIB
LAC1533_RS08395	PTS galactitol transporter subunit IIA
LAC1533_RS08400	DeoR/GlpR transcriptional regulator
LAC1533_RS08430	hypothetical protein
LAC1533_RS08435	hypothetical protein
LAC1533_RS08440	hypothetical protein
LAC1533_RS08445	ATP-dependent helicase
LAC1533_RS08450	class I SAM-dependent DNA methyltransferase
LAC1533_RS08455	XRE family transcriptional regulator
LAC1533_RS08460	helicase
LAC1533_RS08465	DUF1837 domain-containing protein
LAC1533_RS08470	sigma-70 family RNA polymerase sigma factor
LAC1533_RS08475	hypothetical protein
LAC1533_RS08480	hypothetical protein
LAC1533_RS08490	DUF2815 domain-containing protein
LAC1533_RS08500	hypothetical protein
LAC1533_RS08505	DNA primase
LAC1533_RS08510	VRR-NUC domain-containing protein
LAC1533_RS08520	restriction endonuclease
LAC1533_RS08525	HNH endonuclease
LAC1533_RS08530	terminase
LAC1533_RS08535	hypothetical protein
LAC1533_RS08540 IDENTICAL PARALOGS LAC1533_RS08545	DDE domain-containing protein	GSS_RS11345	DDE domain-containing protein
LAC1533_RS08550	DUF5049 domain-containing protein
LAC1533_RS08555	terminase large subunit
LAC1533_RS08560	hypothetical protein
LAC1533_RS08565	type II toxin-antitoxin system RelE/ParE family toxin
LAC1533_RS08575	Clp protease ClpP
LAC1533_RS08580	phage major capsid protein
LAC1533_RS08585	phage gp6-like head-tail connector protein
LAC1533_RS08590	head-tail adaptor protein
LAC1533_RS08595	DNA primase
LAC1533_RS08600	1,4-beta-N-acetylmuramidase
LAC1533_RS08605	hypothetical protein
LAC1533_RS08615	recombinase family protein
LAC1533_RS08620	MFS transporter
LAC1533_RS08625	hypothetical protein
LAC1533_RS08630	23S rRNA (uracil(1939)-C(5))-methyltransferase RlmD	GSS_RS05300	23S rRNA (uracil(1939)-C(5))-methyltransferase RlmD	Lacidipiscis_RS08555	23S rRNA (uracil(1939)-C(5))-methyltransferase RlmD
LAC1533_RS08635	diacylglycerol kinase	GSS_RS05295	diacylglycerol kinase	Lacidipiscis_RS08560	diacylglycerol kinase
LAC1533_RS08640	Asp-tRNA(Asn)/Glu-tRNA(Gln) amidotransferase subunit GatB	GSS_RS05290	Asp-tRNA(Asn)/Glu-tRNA(Gln) amidotransferase subunit GatB	Lacidipiscis_RS08565	Asp-tRNA(Asn)/Glu-tRNA(Gln) amidotransferase subunit GatB
LAC1533_RS08645	Asp-tRNA(Asn)/Glu-tRNA(Gln) amidotransferase subunit GatA	GSS_RS05285	Asp-tRNA(Asn)/Glu-tRNA(Gln) amidotransferase subunit GatA	Lacidipiscis_RS08570	Asp-tRNA(Asn)/Glu-tRNA(Gln) amidotransferase subunit GatA
LAC1533_RS08650	Asp-tRNA(Asn)/Glu-tRNA(Gln) amidotransferase subunit GatC	GSS_RS05280	Asp-tRNA(Asn)/Glu-tRNA(Gln) amidotransferase subunit GatC	Lacidipiscis_RS08575	Asp-tRNA(Asn)/Glu-tRNA(Gln) amidotransferase subunit GatC
LAC1533_RS08655	CamS family sex pheromone protein	GSS_RS05275	CamS family sex pheromone protein	Lacidipiscis_RS08580	CamS family sex pheromone protein
LAC1533_RS08660	NAD-dependent DNA ligase LigA	GSS_RS05270	NAD-dependent DNA ligase LigA	Lacidipiscis_RS08585	NAD-dependent DNA ligase LigA
LAC1533_RS08665	DNA helicase PcrA	GSS_RS05265	DNA helicase PcrA	Lacidipiscis_RS08590	DNA helicase PcrA
LAC1533_RS08670	ATP-grasp domain-containing protein	GSS_RS05260	ATP-grasp domain-containing protein	Lacidipiscis_RS05600	ATP-grasp domain-containing protein
LAC1533_RS08675	xanthine phosphoribosyltransferase	GSS_RS05255	xanthine phosphoribosyltransferase	Lacidipiscis_RS05605	xanthine phosphoribosyltransferase
LAC1533_RS08680	lysozyme	GSS_RS05250	lysozyme	Lacidipiscis_RS05610	lysozyme
LAC1533_RS08685	ECF transporter S component	GSS_RS05245	ECF transporter S component	Lacidipiscis_RS05615	ECF transporter S component
LAC1533_RS08690	MarR family transcriptional regulator	GSS_RS05235	MarR family transcriptional regulator	Lacidipiscis_RS08030	MarR family transcriptional regulator
LAC1533_RS08695	DUF454 domain-containing protein	GSS_RS05230	DUF454 domain-containing protein	Lacidipiscis_RS08035	DUF454 domain-containing protein
LAC1533_RS08700	DNA topoisomerase III	GSS_RS05225	DNA topoisomerase III	Lacidipiscis_RS08040	DNA topoisomerase III
LAC1533_RS08705	50S ribosomal protein L7/L12	GSS_RS05220	50S ribosomal protein L7/L12	Lacidipiscis_RS08045	50S ribosomal protein L7/L12
LAC1533_RS08710	50S ribosomal protein L10	GSS_RS05215	50S ribosomal protein L10	Lacidipiscis_RS08050	50S ribosomal protein L10
LAC1533_RS08715	50S ribosomal protein L1	GSS_RS05210	50S ribosomal protein L1	Lacidipiscis_RS08055	50S ribosomal protein L1
LAC1533_RS08720	50S ribosomal protein L11	GSS_RS05205	50S ribosomal protein L11	Lacidipiscis_RS08060	50S ribosomal protein L11
LAC1533_RS08725	transcription termination/antitermination protein NusG	GSS_RS05200	transcription termination/antitermination protein NusG	Lacidipiscis_RS08065	transcription termination/antitermination protein NusG
LAC1533_RS08730	preprotein translocase subunit SecE	GSS_RS05195	preprotein translocase subunit SecE	Lacidipiscis_RS08070	preprotein translocase subunit SecE
LAC1533_RS08735	50S ribosomal protein L33	GSS_RS05190	50S ribosomal protein L33	Lacidipiscis_RS08075	50S ribosomal protein L33
LAC1533_RS08740	NYN domain-containing protein	GSS_RS05185	NYN domain-containing protein	Lacidipiscis_RS08080	NYN domain-containing protein
LAC1533_RS08745	23S rRNA (guanosine(2251)-2-O)-methyltransferase RlmB	GSS_RS05180	23S rRNA (guanosine(2251)-2-O)-methyltransferase RlmB	Lacidipiscis_RS08085	23S rRNA (guanosine(2251)-2-O)-methyltransferase RlmB
LAC1533_RS08750	hypothetical protein	GSS_RS05175	hypothetical protein	Lacidipiscis_RS08090	hypothetical protein
LAC1533_RS08755	cysteine--tRNA ligase	GSS_RS05170	cysteine--tRNA ligase	Lacidipiscis_RS08095	cysteine--tRNA ligase
LAC1533_RS08760	glutamate--tRNA ligase	GSS_RS05165	glutamate--tRNA ligase	Lacidipiscis_RS08100	glutamate--tRNA ligase
LAC1533_RS08765	PIN/TRAM domain-containing protein	GSS_RS05160	PIN/TRAM domain-containing protein	Lacidipiscis_RS08105	PIN/TRAM domain-containing protein
LAC1533_RS08770	DNA repair protein RadA	GSS_RS05155	DNA repair protein RadA	Lacidipiscis_RS08110	DNA repair protein RadA
LAC1533_RS08775	dUTP diphosphatase	GSS_RS05150	dUTP diphosphatase	Lacidipiscis_RS08115	dUTP diphosphatase
LAC1533_RS08780	ribose-5-phosphate isomerase RpiA	GSS_RS05145	ribose-5-phosphate isomerase RpiA	Lacidipiscis_RS08120	ribose-5-phosphate isomerase RpiA
LAC1533_RS08785	aminopeptidase C	GSS_RS05140	aminopeptidase C	Lacidipiscis_RS08125	aminopeptidase
LAC1533_RS08790	phosphoglycerate mutase	GSS_RS05135	phosphoglycerate mutase	Lacidipiscis_RS08130	phosphoglycerate mutase
LAC1533_RS08795	hypothetical protein			Lacidipiscis_RS10130	hypothetical protein
LAC1533_RS08800	hypothetical protein
LAC1533_RS08805	CHAP domain-containing protein	GSS_RS05120	CHAP domain-containing protein
LAC1533_RS08810	malate transporter	GSS_RS05115	malate transporter	Lacidipiscis_RS10125	malate transporter
LAC1533_RS08815	LytR family transcriptional regulator	GSS_RS12625	LytR family transcriptional regulator	Lacidipiscis_RS10120	LytR family transcriptional regulator
LAC1533_RS08820	ketoacyl-ACP synthase III	GSS_RS05100	ketoacyl-ACP synthase III	Lacidipiscis_RS10115	ketoacyl-ACP synthase III
LAC1533_RS08830	SprT family protein	GSS_RS05090	SprT family protein	Lacidipiscis_RS10105	SprT family protein
LAC1533_RS08835	DNA helicase RecQ	GSS_RS05085	DNA helicase RecQ	Lacidipiscis_RS10100	DNA helicase RecQ
LAC1533_RS08840	hypothetical protein	GSS_RS05080	hypothetical protein
LAC1533_RS08845	ammonia-dependent NAD(+) synthetase	GSS_RS05075	ammonia-dependent NAD(+) synthetase	Lacidipiscis_RS10090	ammonia-dependent NAD(+) synthetase
LAC1533_RS08850	glycosyltransferase	GSS_RS05070	glycosyltransferase	Lacidipiscis_RS10085	glycosyltransferase
LAC1533_RS08860	30S ribosomal protein S9	GSS_RS05065	30S ribosomal protein S9	Lacidipiscis_RS05925	30S ribosomal protein S9
LAC1533_RS08865	50S ribosomal protein L13	GSS_RS05060	50S ribosomal protein L13	Lacidipiscis_RS05930	50S ribosomal protein L13
LAC1533_RS08870	tRNA pseudouridine(38-40) synthase TruA	GSS_RS05055	tRNA pseudouridine(38-40) synthase TruA	Lacidipiscis_RS05935	tRNA pseudouridine(38-40) synthase TruA
LAC1533_RS08875	energy-coupling factor transporter transmembrane protein EcfT	GSS_RS05050	energy-coupling factor transporter transmembrane protein EcfT	Lacidipiscis_RS05940	energy-coupling factor transporter transmembrane protein EcfT
LAC1533_RS08880	energy-coupling factor ABC transporter ATP-binding protein	GSS_RS05045	energy-coupling factor transporter ATPase	Lacidipiscis_RS05945	energy-coupling factor ABC transporter ATP-binding protein
LAC1533_RS08885	energy-coupling factor ABC transporter ATP-binding protein	GSS_RS05040	energy-coupling factor ABC transporter ATP-binding protein	Lacidipiscis_RS05950	energy-coupling factor ABC transporter ATP-binding protein
LAC1533_RS08890	50S ribosomal protein L17	GSS_RS05035	50S ribosomal protein L17	Lacidipiscis_RS05955	50S ribosomal protein L17
LAC1533_RS08895	DNA-directed RNA polymerase subunit alpha	GSS_RS05030	DNA-directed RNA polymerase subunit alpha	Lacidipiscis_RS05960	DNA-directed RNA polymerase subunit alpha
LAC1533_RS08900	30S ribosomal protein S11	GSS_RS05025	30S ribosomal protein S11	Lacidipiscis_RS05965	30S ribosomal protein S11
LAC1533_RS08905	30S ribosomal protein S13	GSS_RS05020	30S ribosomal protein S13	Lacidipiscis_RS05970	30S ribosomal protein S13
LAC1533_RS08910	50S ribosomal protein L36	GSS_RS05015	50S ribosomal protein L36	Lacidipiscis_RS05975	50S ribosomal protein L36
LAC1533_RS08915	translation initiation factor IF-1	GSS_RS05010	translation initiation factor IF-1	Lacidipiscis_RS05980	translation initiation factor IF-1
LAC1533_RS08920	adenylate kinase	GSS_RS05005	adenylate kinase	Lacidipiscis_RS05985	adenylate kinase
LAC1533_RS08925	preprotein translocase subunit SecY	GSS_RS05000	preprotein translocase subunit SecY	Lacidipiscis_RS05990	preprotein translocase subunit SecY
LAC1533_RS08930	50S ribosomal protein L15	GSS_RS04995	50S ribosomal protein L15	Lacidipiscis_RS05995	50S ribosomal protein L15
LAC1533_RS08935	50S ribosomal protein L30	GSS_RS04990	50S ribosomal protein L30	Lacidipiscis_RS06000	50S ribosomal protein L30
LAC1533_RS08940	30S ribosomal protein S5	GSS_RS04985	30S ribosomal protein S5	Lacidipiscis_RS06005	30S ribosomal protein S5
LAC1533_RS08945	50S ribosomal protein L18	GSS_RS04980	50S ribosomal protein L18	Lacidipiscis_RS06010	50S ribosomal protein L18
LAC1533_RS08950	50S ribosomal protein L6	GSS_RS04975	50S ribosomal protein L6	Lacidipiscis_RS06015	50S ribosomal protein L6
LAC1533_RS08955	30S ribosomal protein S8	GSS_RS04970	30S ribosomal protein S8	Lacidipiscis_RS06020	30S ribosomal protein S8
LAC1533_RS08960	type Z 30S ribosomal protein S14	GSS_RS04965	type Z 30S ribosomal protein S14	Lacidipiscis_RS06025	type Z 30S ribosomal protein S14
LAC1533_RS08965	50S ribosomal protein L5	GSS_RS04960	50S ribosomal protein L5	Lacidipiscis_RS06030	50S ribosomal protein L5
LAC1533_RS08970	50S ribosomal protein L24	GSS_RS04955	50S ribosomal protein L24	Lacidipiscis_RS06035	50S ribosomal protein L24
LAC1533_RS08975	50S ribosomal protein L14	GSS_RS04950	50S ribosomal protein L14	Lacidipiscis_RS06040	50S ribosomal protein L14
LAC1533_RS08980	30S ribosomal protein S17	GSS_RS04945	30S ribosomal protein S17	Lacidipiscis_RS06045	30S ribosomal protein S17
LAC1533_RS08985	50S ribosomal protein L29	GSS_RS04940	50S ribosomal protein L29	Lacidipiscis_RS06050	50S ribosomal protein L29
LAC1533_RS08990	50S ribosomal protein L16	GSS_RS04935	50S ribosomal protein L16	Lacidipiscis_RS06055	50S ribosomal protein L16
LAC1533_RS08995	30S ribosomal protein S3	GSS_RS04930	30S ribosomal protein S3	Lacidipiscis_RS06060	30S ribosomal protein S3
LAC1533_RS09000	50S ribosomal protein L22	GSS_RS04925	50S ribosomal protein L22	Lacidipiscis_RS06065	50S ribosomal protein L22
LAC1533_RS09005	30S ribosomal protein S19	GSS_RS04920	30S ribosomal protein S19	Lacidipiscis_RS06070	30S ribosomal protein S19
LAC1533_RS09010	50S ribosomal protein L2	GSS_RS04915	50S ribosomal protein L2	Lacidipiscis_RS06075	50S ribosomal protein L2
LAC1533_RS09015	50S ribosomal protein L23	GSS_RS04910	50S ribosomal protein L23	Lacidipiscis_RS06080	50S ribosomal protein L23
LAC1533_RS09020	50S ribosomal protein L4	GSS_RS04905	50S ribosomal protein L4	Lacidipiscis_RS06085	50S ribosomal protein L4
LAC1533_RS09025	50S ribosomal protein L3	GSS_RS04900	50S ribosomal protein L3	Lacidipiscis_RS06090	50S ribosomal protein L3
LAC1533_RS09030	30S ribosomal protein S10	GSS_RS04895	30S ribosomal protein S10	Lacidipiscis_RS06095	30S ribosomal protein S10
LAC1533_RS09035	IS1380 family transposase
LAC1533_RS09040	cysteine hydrolase	GSS_RS04890	cysteine hydrolase	Lacidipiscis_RS06100	cysteine hydrolase
LAC1533_RS09045	elongation factor G	GSS_RS04885	elongation factor G	Lacidipiscis_RS06105	elongation factor G
LAC1533_RS09050	30S ribosomal protein S7	GSS_RS04880	30S ribosomal protein S7	Lacidipiscis_RS06110	30S ribosomal protein S7
LAC1533_RS09055	30S ribosomal protein S12	GSS_RS04875	30S ribosomal protein S12	Lacidipiscis_RS06115	30S ribosomal protein S12
LAC1533_RS09060	prepilin peptidase	GSS_RS14050	prepilin peptidase	Lacidipiscis_RS06120	prepilin peptidase
LAC1533_RS09065	group II intron reverse transcriptase/maturase
LAC1533_RS09075	DNA-directed RNA polymerase subunit beta	GSS_RS10275	DNA-directed RNA polymerase subunit beta	Lacidipiscis_RS09300	DNA-directed RNA polymerase subunit beta
LAC1533_RS09080	DNA-directed RNA polymerase subunit beta	GSS_RS10270	DNA-directed RNA polymerase subunit beta	Lacidipiscis_RS09305	DNA-directed RNA polymerase subunit beta
LAC1533_RS09085	ATP-dependent Clp protease ATP-binding subunit	GSS_RS10265	ATP-dependent Clp protease ATP-binding subunit	Lacidipiscis_RS09310	ATP-dependent Clp protease ATP-binding subunit
LAC1533_RS09090	CtsR family transcriptional regulator	GSS_RS10260	CtsR family transcriptional regulator	Lacidipiscis_RS09315	CtsR family transcriptional regulator
LAC1533_RS09095	transposase
LAC1533_RS09165	tyrosine--tRNA ligase	GSS_RS08515	tyrosine--tRNA ligase	Lacidipiscis_RS07965	tyrosine--tRNA ligase
LAC1533_RS09170	transcriptional repressor	GSS_RS08510	transcriptional repressor	Lacidipiscis_RS07970	transcriptional repressor
LAC1533_RS09175	metal-dependent hydrolase	GSS_RS08505	metal-dependent hydrolase	Lacidipiscis_RS07975	metal-dependent hydrolase
LAC1533_RS09180	SMC family ATPase	GSS_RS08500	SMC family ATPase	Lacidipiscis_RS07980	SMC family ATPase
LAC1533_RS09185	exonuclease SbcCD subunit D	GSS_RS08495	exonuclease SbcCD subunit D	Lacidipiscis_RS07985	exonuclease SbcCD subunit D
LAC1533_RS09190	hypothetical protein	GSS_RS08490	hypothetical protein	Lacidipiscis_RS07990	hypothetical protein
LAC1533_RS09195	hypothetical protein	GSS_RS14125	hypothetical protein	Lacidipiscis_RS04685	hypothetical protein
LAC1533_RS09200	GntR family transcriptional regulator	GSS_RS08485	GntR family transcriptional regulator	Lacidipiscis_RS04690	GntR family transcriptional regulator
LAC1533_RS09205	transposase
LAC1533_RS09210	class I SAM-dependent methyltransferase	GSS_RS08480	class I SAM-dependent methyltransferase	Lacidipiscis_RS04695	class I SAM-dependent methyltransferase
LAC1533_RS09215	MgtC/SapB family protein	GSS_RS08475	MgtC/SapB family protein	Lacidipiscis_RS04700	MgtC/SapB family protein
LAC1533_RS09220	glycosyltransferase family 4 protein	GSS_RS08470	glycosyltransferase family 4 protein	Lacidipiscis_RS04705	glycosyltransferase family 4 protein
LAC1533_RS09225	protein-tyrosine-phosphatase	GSS_RS08465	protein-tyrosine-phosphatase	Lacidipiscis_RS04710	protein-tyrosine-phosphatase
LAC1533_RS09230	histidine phosphatase family protein	GSS_RS08460	histidine phosphatase family protein	Lacidipiscis_RS04715	histidine phosphatase family protein
LAC1533_RS09235	D-alanine--D-alanine ligase	GSS_RS08455	D-alanine--D-alanine ligase	Lacidipiscis_RS04720	D-alanine--D-alanine ligase
LAC1533_RS09240	hypothetical protein	GSS_RS08450	hypothetical protein	Lacidipiscis_RS04725	hypothetical protein
LAC1533_RS09245	alpha/beta hydrolase	GSS_RS08445	alpha/beta hydrolase	Lacidipiscis_RS04730	alpha/beta hydrolase
LAC1533_RS09255	ASCH domain-containing protein	GSS_RS08440	ASCH domain-containing protein	Lacidipiscis_RS04735	ASCH domain-containing protein
LAC1533_RS09260	peptidase T	GSS_RS08435	peptidase T	Lacidipiscis_RS04740	peptidase T
LAC1533_RS09270	putative N-acetylmannosamine-6-phosphate 2-epimerase	GSS_RS08425	putative N-acetylmannosamine-6-phosphate 2-epimerase	Lacidipiscis_RS04750	putative N-acetylmannosamine-6-phosphate 2-epimerase
LAC1533_RS09275	hypothetical protein	GSS_RS08420	hypothetical protein	Lacidipiscis_RS04755	hypothetical protein
LAC1533_RS09280	hypothetical protein	GSS_RS08415	hypothetical protein	Lacidipiscis_RS04760	hypothetical protein
LAC1533_RS09285	hypothetical protein	GSS_RS08410	hypothetical protein	Lacidipiscis_RS04765	hypothetical protein
LAC1533_RS09290	arginase	GSS_RS08405	arginase	Lacidipiscis_RS04770	arginase
LAC1533_RS09295	OsmC family peroxiredoxin	GSS_RS08400	OsmC family peroxiredoxin	Lacidipiscis_RS04775	OsmC family peroxiredoxin
LAC1533_RS09300	hypothetical protein	GSS_RS08395	hypothetical protein	Lacidipiscis_RS04780	hypothetical protein
LAC1533_RS09305	exodeoxyribonuclease III	GSS_RS08390	exodeoxyribonuclease III	Lacidipiscis_RS04785	exodeoxyribonuclease III
LAC1533_RS09320	IS66 family transposase	GSS_RS08385	IS66 family transposase
LAC1533_RS09335	sigma-70 family RNA polymerase sigma factor	GSS_RS08370	hypothetical protein
LAC1533_RS09345	DUF3173 domain-containing protein	GSS_RS08355	DUF3173 domain-containing protein
LAC1533_RS09350	site-specific integrase	GSS_RS08350	site-specific integrase
LAC1533_RS09355	glutamine-hydrolyzing GMP synthase	GSS_RS08345	glutamine-hydrolyzing GMP synthase	Lacidipiscis_RS09005	glutamine-hydrolyzing GMP synthase
LAC1533_RS09360	type I pantothenate kinase			Lacidipiscis_RS09010	type I pantothenate kinase
LAC1533_RS09365	lipase	GSS_RS08335	lipase	Lacidipiscis_RS09015	acylhydrolase
LAC1533_RS09370	ATP-dependent DNA helicase	GSS_RS08330	ATP-dependent DNA helicase	Lacidipiscis_RS09020	ATP-dependent DNA helicase
LAC1533_RS09375	potassium transporter	GSS_RS08325	potassium transporter	Lacidipiscis_RS09025	potassium transporter
LAC1533_RS09380	histidine phosphatase family protein	GSS_RS08320	histidine phosphatase family protein	Lacidipiscis_RS09030	histidine phosphatase family protein
LAC1533_RS09385	histidine phosphatase family protein	GSS_RS08315	histidine phosphatase family protein	Lacidipiscis_RS09035	histidine phosphatase family protein
LAC1533_RS09390	hypothetical protein
LAC1533_RS09395	IS66 family insertion sequence hypothetical protein	GSS_RS11630	IS66 family insertion sequence hypothetical protein
LAC1533_RS09400	hypothetical protein
LAC1533_RS09405	NERD domain-containing protein	GSS_RS08300	NERD domain-containing protein	Lacidipiscis_RS09040	NERD domain-containing protein
LAC1533_RS09410	transposase
LAC1533_RS09415	ABC transporter ATP-binding protein	GSS_RS08295	ABC transporter ATP-binding protein	Lacidipiscis_RS09045	ABC transporter ATP-binding protein
LAC1533_RS09420	ABC transporter ATP-binding protein			Lacidipiscis_RS09050	ABC transporter ATP-binding protein
LAC1533_RS09425	ABC transporter permease	GSS_RS08280	ABC transporter permease	Lacidipiscis_RS09055	ABC transporter permease
LAC1533_RS09430	ABC transporter permease	GSS_RS08275	ABC transporter permease	Lacidipiscis_RS09060	ABC transporter permease
LAC1533_RS09435	peptide ABC transporter substrate-binding protein	GSS_RS08270	peptide ABC transporter substrate-binding protein	Lacidipiscis_RS09065	peptide ABC transporter substrate-binding protein
LAC1533_RS09440	GTPase HflX	GSS_RS08265	GTPase HflX	Lacidipiscis_RS09070	GTPase HflX
LAC1533_RS09445	N-acetyltransferase	GSS_RS08260	N-acetyltransferase	Lacidipiscis_RS09075	N-acetyltransferase
LAC1533_RS09455	amino acid ABC transporter permease	GSS_RS08255	amino acid ABC transporter permease	Lacidipiscis_RS09080	amino acid ABC transporter permease
LAC1533_RS09460	amino acid ABC transporter permease	GSS_RS08250	amino acid ABC transporter permease	Lacidipiscis_RS09085	amino acid ABC transporter permease
LAC1533_RS09465	glutamine ABC transporter substrate-binding protein	GSS_RS08245	glutamine ABC transporter substrate-binding protein	Lacidipiscis_RS09090	glutamine ABC transporter substrate-binding protein
LAC1533_RS09470	amino acid ABC transporter ATP-binding protein	GSS_RS08240	amino acid ABC transporter ATP-binding protein	Lacidipiscis_RS09095	amino acid ABC transporter ATP-binding protein
LAC1533_RS09475	hypothetical protein	GSS_RS08235	hypothetical protein
LAC1533_RS09485	hypothetical protein	GSS_RS11705	hypothetical protein
LAC1533_RS09490	transcriptional repressor	GSS_RS08230	transcriptional repressor	Lacidipiscis_RS07285	transcriptional repressor
LAC1533_RS09495	guanylate kinase	GSS_RS12940	guanylate kinase	Lacidipiscis_RS07290	guanylate kinase
LAC1533_RS09500	amino acid permease	GSS_RS08220	amino acid permease	Lacidipiscis_RS07295	amino acid permease
LAC1533_RS09505	hypothetical protein	GSS_RS08215	hypothetical protein	Lacidipiscis_RS07300	hypothetical protein
LAC1533_RS09510 IDENTICAL PARALOGS LAC1533_RS11215	transposase
LAC1533_RS09515	ECF transporter S component	GSS_RS08210	ECF transporter S component	Lacidipiscis_RS07305	ECF transporter S component
LAC1533_RS09520	Xaa-Pro dipeptidyl-peptidase	GSS_RS08205	Xaa-Pro dipeptidyl-peptidase	Lacidipiscis_RS07310	Xaa-Pro dipeptidyl-peptidase
LAC1533_RS09525	metal ABC transporter substrate-binding protein	GSS_RS08200	metal ABC transporter substrate-binding protein	Lacidipiscis_RS07315	metal ABC transporter substrate-binding protein
LAC1533_RS09535	phosphate ABC transporter ATP-binding protein	GSS_RS08190	methionine ABC transporter ATP-binding protein	Lacidipiscis_RS07325	phosphate ABC transporter ATP-binding protein
LAC1533_RS09540	KR domain-containing protein	GSS_RS08185	KR domain-containing protein	Lacidipiscis_RS07330	KR domain-containing protein
LAC1533_RS09545	prolyl aminopeptidase	GSS_RS08175	prolyl aminopeptidase	Lacidipiscis_RS07335	prolyl aminopeptidase
LAC1533_RS09550	Cof-type HAD-IIB family hydrolase	GSS_RS08170	Cof-type HAD-IIB family hydrolase	Lacidipiscis_RS07340	Cof-type HAD-IIB family hydrolase
LAC1533_RS09555	DUF969 domain-containing protein	GSS_RS08165	DUF969 domain-containing protein	Lacidipiscis_RS10825	DUF969 domain-containing protein
LAC1533_RS09560	DUF979 domain-containing protein	GSS_RS08160	DUF979 domain-containing protein	Lacidipiscis_RS10820	DUF979 domain-containing protein
LAC1533_RS09565	pyroglutamyl-peptidase I	GSS_RS08155	pyroglutamyl-peptidase I	Lacidipiscis_RS10815	pyroglutamyl-peptidase I
LAC1533_RS09575	sugar ABC transporter permease	GSS_RS08145	sugar ABC transporter permease	Lacidipiscis_RS10805	sugar ABC transporter permease
LAC1533_RS09580	carbohydrate ABC transporter substrate-binding protein			Lacidipiscis_RS10800	carbohydrate ABC transporter substrate-binding protein
LAC1533_RS09585	ABC transporter ATP-binding protein	GSS_RS08135	ABC transporter ATP-binding protein
LAC1533_RS09590	putative polysaccharide biosynthesis protein	GSS_RS08130	putative polysaccharide biosynthesis protein	Lacidipiscis_RS10790	putative polysaccharide biosynthesis protein
LAC1533_RS09595	DNA starvation/stationary phase protection protein	GSS_RS08125	DNA starvation/stationary phase protection protein	Lacidipiscis_RS10785	DNA starvation/stationary phase protection protein
LAC1533_RS09600	aldo/keto reductase	GSS_RS08120	aldo/keto reductase	Lacidipiscis_RS10780	aldo/keto reductase
LAC1533_RS09605	glyoxalase	GSS_RS08115	glyoxalase	Lacidipiscis_RS10775	glyoxalase
LAC1533_RS09610	hypothetical protein	GSS_RS08110	hypothetical protein	Lacidipiscis_RS10770	hypothetical protein
LAC1533_RS09615	GTP-binding protein	GSS_RS08100	GTP-binding protein	Lacidipiscis_RS10765	GTP-binding protein
LAC1533_RS09620	LysM domain-containing protein	GSS_RS08095	LysM domain-containing protein	Lacidipiscis_RS10760	LysM domain-containing protein
LAC1533_RS09630	DegV family EDD domain-containing protein	GSS_RS08080	DegV family EDD domain-containing protein	Lacidipiscis_RS10750	DegV family EDD domain-containing protein
LAC1533_RS09635	methyl-accepting chemotaxis protein	GSS_RS08075	methyl-accepting chemotaxis protein	Lacidipiscis_RS10745	methyl-accepting chemotaxis protein
LAC1533_RS09640	flagellin	GSS_RS08070	flagellar hook-associated protein 3	Lacidipiscis_RS10740	flagellar hook-associated protein 3
LAC1533_RS09645	flagellar hook-associated protein FlgK	GSS_RS08065	flagellar hook-associated protein FlgK	Lacidipiscis_RS10735	flagellar hook-associated protein FlgK
LAC1533_RS09650	hypothetical protein	GSS_RS08060	hypothetical protein	Lacidipiscis_RS10730	hypothetical protein
LAC1533_RS09655	flagellar biosynthesis anti-sigma factor FlgM	GSS_RS12920	flagellar biosynthesis anti-sigma factor FlgM	Lacidipiscis_RS10725	flagellar biosynthesis anti-sigma factor FlgM
LAC1533_RS09660	flagellar motor switch phosphatase FliY	GSS_RS08050	flagellar motor switch phosphatase FliY	Lacidipiscis_RS10720	flagellar motor switch phosphatase FliY
LAC1533_RS09665	flagellar motor switch protein FliM	GSS_RS08045	flagellar motor switch protein FliM	Lacidipiscis_RS10715	flagellar motor switch protein FliM
LAC1533_RS09670	hypothetical protein	GSS_RS08040	hypothetical protein	Lacidipiscis_RS10710	hypothetical protein
LAC1533_RS09675	response regulator	GSS_RS08035	response regulator	Lacidipiscis_RS10705	response regulator
LAC1533_RS09680	chemotaxis protein CheC	GSS_RS08030	chemotaxis protein CheC	Lacidipiscis_RS10700	chemotaxis protein CheC
LAC1533_RS09685	chemotaxis protein CheA	GSS_RS08025	chemotaxis protein CheA	Lacidipiscis_RS10695	chemotaxis protein CheA
LAC1533_RS09690	protein-glutamate O-methyltransferase CheR	GSS_RS08020	protein-glutamate O-methyltransferase CheR	Lacidipiscis_RS10690	protein-glutamate O-methyltransferase CheR
LAC1533_RS09695	chemotaxis-specific protein-glutamate methyltransferase CheB	GSS_RS08015	chemotaxis-specific protein-glutamate methyltransferase CheB	Lacidipiscis_RS10685	chemotaxis-specific protein-glutamate methyltransferase CheB
LAC1533_RS09700	chemotaxis protein CheD	GSS_RS08010	chemotaxis protein CheD	Lacidipiscis_RS10680	chemotaxis protein CheD
LAC1533_RS09705	chemotaxis protein CheW	GSS_RS08005	chemotaxis protein CheW	Lacidipiscis_RS10675	chemotaxis protein CheW
LAC1533_RS09710	hypothetical protein	GSS_RS08000	methyl-accepting chemotaxis sensory transducer	Lacidipiscis_RS10670	hypothetical protein
LAC1533_RS09715	cell division protein FtsE	GSS_RS07995	cell division protein FtsE	Lacidipiscis_RS10665	cell division protein FtsE
LAC1533_RS09720	flagellar hook basal-body protein	GSS_RS07990	flagellar hook basal-body protein	Lacidipiscis_RS10660	flagellar hook basal-body protein
LAC1533_RS09725	flagellar hook-basal body protein	GSS_RS07985	flagellar hook-basal body protein	Lacidipiscis_RS10655	flagellar hook-basal body protein
LAC1533_RS09730	FliA/WhiG family RNA polymerase sigma factor	GSS_RS07980	FliA/WhiG family RNA polymerase sigma factor	Lacidipiscis_RS10650	FliA/WhiG family RNA polymerase sigma factor
LAC1533_RS09735	flagellar biosynthesis protein FlhA	GSS_RS07975	flagellar biosynthesis protein FlhA	Lacidipiscis_RS10645	flagellar biosynthesis protein FlhA
LAC1533_RS09740	flagellar type III secretion system protein FlhB	GSS_RS07970	flagellar type III secretion system protein FlhB	Lacidipiscis_RS10640	flagellar type III secretion system protein FlhB
LAC1533_RS09745	type III secretion protein	GSS_RS07965	type III secretion protein	Lacidipiscis_RS10635	flagellar biosynthetic protein FliR
LAC1533_RS09750	flagellar biosynthetic protein FliQ	GSS_RS07960	flagellar biosynthetic protein FliQ	Lacidipiscis_RS10630	flagellar biosynthetic protein FliQ
LAC1533_RS09755	flagellar biosynthetic protein FliP	GSS_RS07955	flagellar biosynthetic protein FliP	Lacidipiscis_RS10625	flagellar biosynthetic protein FliP
LAC1533_RS09760	flagellar biosynthesis protein FliO	GSS_RS12915	flagellar biosynthesis protein FliO	Lacidipiscis_RS10620	hypothetical protein
LAC1533_RS09765	flagellar biosynthesis protein FliL	GSS_RS07945	flagellar biosynthesis protein FliL	Lacidipiscis_RS10615	hypothetical protein
LAC1533_RS09770	flagellar protein FlbD	GSS_RS07940	flagellar protein FlbD	Lacidipiscis_RS10610	endoflagellar protein
LAC1533_RS09775	flagellar hook protein	GSS_RS07935	flagellar hook protein	Lacidipiscis_RS10605	flagellar hook protein
LAC1533_RS09780	flagellar basal body rod modification protein	GSS_RS07930	flagellar basal body rod modification protein	Lacidipiscis_RS10600	hypothetical protein
LAC1533_RS09785	flagellar hook-length control protein FliK	GSS_RS12910	flagellar hook-length control protein FliK	Lacidipiscis_RS10595	flagellar hook-length control protein FliK
LAC1533_RS09790	flagellar export protein FliJ	GSS_RS07915	flagellar export protein FliJ	Lacidipiscis_RS10590	flagellar export protein FliJ
LAC1533_RS09795	flagellar protein export ATPase FliI	GSS_RS07910	flagellar protein export ATPase FliI	Lacidipiscis_RS10585	flagellar protein export ATPase FliI
LAC1533_RS09800	hypothetical protein	GSS_RS07905	flagellar assembly protein FliH	Lacidipiscis_RS10580	hypothetical protein
LAC1533_RS09805	flagellar motor switch protein FliG	GSS_RS07900	flagellar motor switch protein FliG	Lacidipiscis_RS10575	flagellar motor switch protein FliG
LAC1533_RS09810	flagellar M-ring protein FliF	GSS_RS07895	flagellar M-ring protein FliF	Lacidipiscis_RS10570	flagellar M-ring protein FliF
LAC1533_RS09815	flagellar hook-basal body complex protein FliE	GSS_RS07890	flagellar hook-basal body complex protein FliE	Lacidipiscis_RS10565	flagellar hook-basal body complex protein FliE
LAC1533_RS09820	flagellar basal body rod protein FlgC	GSS_RS07885	flagellar basal body rod protein FlgC	Lacidipiscis_RS10560	flagellar basal body rod protein FlgC
LAC1533_RS09825	flagellar basal body rod protein FlgB	GSS_RS07880	flagellar basal body rod protein FlgB	Lacidipiscis_RS10555	flagellar basal body rod protein FlgB
LAC1533_RS09830	IS256 family transposase
LAC1533_RS09835	hypothetical protein	GSS_RS08520	flagellar motor protein MotB	Lacidipiscis_RS06175	hypothetical protein
LAC1533_RS09840	flagellar motor protein MotA	GSS_RS08525	flagellar motor protein MotA	Lacidipiscis_RS06170	flagellar motor protein MotA
LAC1533_RS09845	flagellar export chaperone FliS	GSS_RS08530	flagellar export chaperone FliS	Lacidipiscis_RS06165	flagellar export chaperone FliS
LAC1533_RS09850	hypothetical protein	GSS_RS08535	hypothetical protein	Lacidipiscis_RS06160	hypothetical protein
LAC1533_RS09855	hypothetical protein	GSS_RS08540	flagellum hook associated protein FliD	Lacidipiscis_RS06155	hypothetical protein
LAC1533_RS09860	flagellar protein FlaG	GSS_RS13755	flagellar protein FlaG	Lacidipiscis_RS06150	hypothetical protein
LAC1533_RS09875	flagellin	GSS_RS08550	flagellin	Lacidipiscis_RS06145	flagellin
LAC1533_RS09880	flagellin	GSS_RS08555	flagellin	Lacidipiscis_RS06140	flagellin
LAC1533_RS09885	LysM domain-containing protein	GSS_RS08560	LysM domain-containing protein	Lacidipiscis_RS06135	LysM domain-containing protein
LAC1533_RS09895	hypothetical protein			Lacidipiscis_RS12250	hypothetical protein
LAC1533_RS09900	hypothetical protein	GSS_RS08575	hypothetical protein	Lacidipiscis_RS12245	hypothetical protein
LAC1533_RS09905	aldo/keto reductase	GSS_RS08580	glyceraldehyde 3-phosphate reductase	Lacidipiscis_RS12240	aldo/keto reductase
LAC1533_RS09910	addiction module antidote protein, HigA family	GSS_RS08585	addiction module antidote protein, HigA family	Lacidipiscis_RS12235	addiction module antidote protein, HigA family
LAC1533_RS09915	plasmid maintenance system killer	GSS_RS08590	plasmid maintenance system killer	Lacidipiscis_RS12230	plasmid maintenance system killer
LAC1533_RS09925	alpha-mannosidase	GSS_RS12990	alpha-mannosidase	Lacidipiscis_RS07550	alpha-mannosidase
LAC1533_RS09935	PTS fructose transporter subunit IIB	GSS_RS08610	PTS fructose transporter subunit IIB	Lacidipiscis_RS07540	PTS fructose transporter subunit IIB
LAC1533_RS09940	hypothetical protein	GSS_RS08615	hypothetical protein	Lacidipiscis_RS07535	hypothetical protein
LAC1533_RS09945	IS30 family transposase
LAC1533_RS09950	hypothetical protein	GSS_RS13780	hypothetical protein
LAC1533_RS09955	PRD domain-containing protein	GSS_RS13000	PRD domain-containing protein	Lacidipiscis_RS07530	PRD domain-containing protein
LAC1533_RS09965	glycosyl hydrolase	GSS_RS08625	glycosyl hydrolase	Lacidipiscis_RS07520	hypothetical protein
LAC1533_RS09970	acyltransferase	GSS_RS08630	acyltransferase	Lacidipiscis_RS07515	acyltransferase
LAC1533_RS09975	hypothetical protein	GSS_RS08635	hypothetical protein	Lacidipiscis_RS07510	hypothetical protein
LAC1533_RS09980	PrsW family intramembrane metalloprotease	GSS_RS08640	PrsW family intramembrane metalloprotease	Lacidipiscis_RS07505	PrsW family intramembrane metalloprotease
LAC1533_RS09985	thioredoxin	GSS_RS08645	thioredoxin	Lacidipiscis_RS07500	thioredoxin
LAC1533_RS09990	Cof-type HAD-IIB family hydrolase	GSS_RS08650	Cof-type HAD-IIB family hydrolase	Lacidipiscis_RS07495	Cof-type HAD-IIB family hydrolase
LAC1533_RS09995	DUF475 domain-containing protein	GSS_RS08655	DUF475 domain-containing protein	Lacidipiscis_RS07490	DUF475 domain-containing protein
LAC1533_RS10000	hypothetical protein	GSS_RS08660	hypothetical protein	Lacidipiscis_RS07485	hypothetical protein
LAC1533_RS10005	DUF1624 domain-containing protein	GSS_RS14140	DUF1624 domain-containing protein
LAC1533_RS10010	XRE family transcriptional regulator	GSS_RS08665	XRE family transcriptional regulator	Lacidipiscis_RS06315	XRE family transcriptional regulator
LAC1533_RS10020	hypothetical protein	GSS_RS13790	hypothetical protein	Lacidipiscis_RS04340	LTA synthase family protein
LAC1533_RS10025	L,D-transpeptidase	GSS_RS08690	hypothetical protein	Lacidipiscis_RS04345	L,D-transpeptidase
LAC1533_RS10030	2-dehydropantoate 2-reductase	GSS_RS08700	2-dehydropantoate 2-reductase	Lacidipiscis_RS04350	2-dehydropantoate 2-reductase
LAC1533_RS10035	hypothetical protein	GSS_RS14150	hypothetical protein	Lacidipiscis_RS04355	hypothetical protein
LAC1533_RS10040	MFS transporter	GSS_RS08705	MFS transporter	Lacidipiscis_RS04360	MFS transporter
LAC1533_RS10045	PAS domain S-box protein	GSS_RS08710	PAS domain S-box protein	Lacidipiscis_RS04365	PAS domain S-box protein
LAC1533_RS10050	PAS domain S-box protein			Lacidipiscis_RS03450	PAS domain S-box protein
LAC1533_RS10055	hypothetical protein	GSS_RS08725	hypothetical protein	Lacidipiscis_RS03455	hypothetical protein
LAC1533_RS10075	IS256 family transposase
LAC1533_RS10080	LysM peptidoglycan-binding domain-containing protein	GSS_RS08745	LysM peptidoglycan-binding domain-containing protein
LAC1533_RS10105	class II aldolase family protein	GSS_RS08760	class II aldolase family protein
LAC1533_RS10110	PTS galactitol transporter subunit IIC	GSS_RS08770	PTS Galactitol IIC component
LAC1533_RS10115	PTS galactitol transporter subunit IIB	GSS_RS08775	PTS galactitol transporter subunit IIB
LAC1533_RS10120	hypothetical protein	GSS_RS08780	PTS IIA-like nitrogen-regulatory protein PtsN
LAC1533_RS10130	glycerate kinase	GSS_RS08790	glycerate kinase
LAC1533_RS10135	hypothetical protein	GSS_RS14230	hypothetical protein
LAC1533_RS10140	XRE family transcriptional regulator	GSS_RS13410	XRE family transcriptional regulator
LAC1533_RS10150	hypothetical protein
LAC1533_RS10160	LytR family transcriptional regulator	GSS_RS08795	LytR family transcriptional regulator	Lacidipiscis_RS10185	transcriptional regulator
LAC1533_RS10165	hypothetical protein
LAC1533_RS10170	IS1380 family transposase
LAC1533_RS10175	hypothetical protein	GSS_RS13050	hypothetical protein	Lacidipiscis_RS01255	LysM peptidoglycan-binding domain-containing protein
LAC1533_RS10180	DUF2922 domain-containing protein	GSS_RS08860	DUF2922 domain-containing protein
LAC1533_RS10185	hypothetical protein	GSS_RS08865	hypothetical protein
LAC1533_RS10190	peptidase	GSS_RS08870	peptidase
LAC1533_RS10195	DUF2922 domain-containing protein	GSS_RS08875	DUF2922 domain-containing protein
LAC1533_RS10200	hypothetical protein	GSS_RS08880	hypothetical protein
LAC1533_RS10205	sigma-70 family RNA polymerase sigma factor	GSS_RS08885	sigma-70 family RNA polymerase sigma factor
LAC1533_RS10210	hypothetical protein	GSS_RS08890	hypothetical protein	Lacidipiscis_RS03975	hypothetical protein
LAC1533_RS10215	MurR/RpiR family transcriptional regulator	GSS_RS08895	MurR/RpiR family transcriptional regulator	Lacidipiscis_RS03980	MurR/RpiR family transcriptional regulator
LAC1533_RS10220	PTS sugar transporter subunit IIC	GSS_RS08900	PTS sugar transporter subunit IIC	Lacidipiscis_RS03985	PTS sugar transporter subunit IIC
LAC1533_RS10225	aryl-phospho-beta-D-glucosidase	GSS_RS08905	6-phospho-beta-glucosidase	Lacidipiscis_RS03990	aryl-phospho-beta-D-glucosidase
LAC1533_RS10230	ROK family protein	GSS_RS08910	ROK family protein	Lacidipiscis_RS03995	ROK family protein
LAC1533_RS10235	hypothetical protein
LAC1533_RS10255	dTDP-glucose 4,6-dehydratase	GSS_RS08915	dTDP-glucose 4,6-dehydratase	Lacidipiscis_RS04005	dTDP-glucose 4,6-dehydratase
LAC1533_RS10260	DegV family protein	GSS_RS08920	DegV family protein	Lacidipiscis_RS04020	DegV family protein
LAC1533_RS10265	cadmium-translocating P-type ATPase	GSS_RS08925	heavy metal translocating P-type ATPase	Lacidipiscis_RS04050	heavy metal translocating P-type ATPase
LAC1533_RS10310	hypothetical protein	GSS_RS13055	hypothetical protein
LAC1533_RS10320	glycosyltransferase family 2 protein
LAC1533_RS10325	hypothetical protein
LAC1533_RS10330	hypothetical protein			Lacidipiscis_RS02465	hypothetical protein
LAC1533_RS10335	hypothetical protein			Lacidipiscis_RS02460	flippase
LAC1533_RS10340	UDP-galactopyranose mutase			Lacidipiscis_RS02455	UDP-galactopyranose mutase
LAC1533_RS10345	hypothetical protein
LAC1533_RS10350	hypothetical protein
LAC1533_RS10355	hypothetical protein			Lacidipiscis_RS02480	hypothetical protein
LAC1533_RS10360	hypothetical protein
LAC1533_RS10365	LicD family protein
LAC1533_RS10370	DUF4422 domain-containing protein			Lacidipiscis_RS04055	DUF4422 domain-containing protein
LAC1533_RS10375	sugar transferase			Lacidipiscis_RS04060	sugar transferase
LAC1533_RS10380	galactofuranosyltransferase
LAC1533_RS10385	glycosyltransferase family 2 protein			Lacidipiscis_RS02400	glycosyltransferase family 2 protein
LAC1533_RS10390	hypothetical protein			Lacidipiscis_RS02415	hypothetical protein
LAC1533_RS10395	glycosyltransferase			Lacidipiscis_RS02395	glycosyltransferase
LAC1533_RS10400	hypothetical protein
LAC1533_RS10405	glycerol-3-phosphate cytidylyltransferase	GSS_RS06455	glycerol-3-phosphate cytidylyltransferase	Lacidipiscis_RS12700	glycerol-3-phosphate cytidylyltransferase
LAC1533_RS10415	GtrA family protein	GSS_RS06505	GtrA family protein	Lacidipiscis_RS12695	GtrA family protein
LAC1533_RS10425	undecaprenyl/decaprenyl-phosphate alpha-N-acetylglucosaminyl 1-phosphate transferase	GSS_RS06450	undecaprenyl/decaprenyl-phosphate alpha-N-acetylglucosaminyl 1-phosphate transferase	Lacidipiscis_RS12690	undecaprenyl/decaprenyl-phosphate alpha-N-acetylglucosaminyl 1-phosphate transferase
LAC1533_RS10430	IS256 family transposase	GSS_RS11465	IS256 family transposase	Lacidipiscis_RS02665	IS256 family transposase
LAC1533_RS10435	IS30 family transposase
LAC1533_RS10440	hypothetical protein
LAC1533_RS10450	hypothetical protein
LAC1533_RS10455	hypothetical protein
LAC1533_RS10465	type II toxin-antitoxin system RelE/ParE family toxin	GSS_RS10960	type II toxin-antitoxin system RelE/ParE family toxin	Lacidipiscis_RS12480	type II toxin-antitoxin system RelE/ParE family toxin
LAC1533_RS10470	Cna B-type domain-containing protein
LAC1533_RS10475	hypothetical protein	GSS_RS06515	hypothetical protein	Lacidipiscis_RS09920	hypothetical protein
LAC1533_RS10480	class A sortase	GSS_RS06520	class A sortase	Lacidipiscis_RS09925	class A sortase
LAC1533_RS10485	TetR/AcrR family transcriptional regulator	GSS_RS06525	TetR/AcrR family transcriptional regulator
LAC1533_RS10490	sulfite exporter TauE/SafE family protein	GSS_RS06530	sulfite exporter TauE/SafE family protein	Lacidipiscis_RS09935	sulfite exporter TauE/SafE family protein
LAC1533_RS10495	hypothetical protein	GSS_RS06535	hypothetical protein	Lacidipiscis_RS09940	hypothetical protein
LAC1533_RS10500	murein L,D-transpeptidase	GSS_RS06540	murein L,D-transpeptidase	Lacidipiscis_RS09945	murein L,D-transpeptidase
LAC1533_RS10505	hypothetical protein			Lacidipiscis_RS09950	hypothetical protein
LAC1533_RS10510	PTS fructose transporter subunit IIC	GSS_RS06550	PTS fructose transporter subunit IIC	Lacidipiscis_RS09955	PTS fructose transporter subunit IIC
LAC1533_RS10515	1-phosphofructokinase	GSS_RS06555	1-phosphofructokinase	Lacidipiscis_RS09960	1-phosphofructokinase
LAC1533_RS10520	DeoR/GlpR transcriptional regulator	GSS_RS06560	DeoR/GlpR transcriptional regulator	Lacidipiscis_RS09965	DeoR/GlpR transcriptional regulator
LAC1533_RS10530	D-lactate dehydrogenase
LAC1533_RS10535	CsbD family protein	GSS_RS06575	CsbD family protein	Lacidipiscis_RS02330	CsbD family protein
LAC1533_RS10540	hypothetical protein	GSS_RS13735	hypothetical protein	Lacidipiscis_RS02335	hypothetical protein
LAC1533_RS10545	DUF1694 domain-containing protein	GSS_RS06590	DUF1694 domain-containing protein	Lacidipiscis_RS02340	DUF1694 domain-containing protein
LAC1533_RS10550	hypothetical protein	GSS_RS06595	hypothetical protein	Lacidipiscis_RS02345	hypothetical protein
LAC1533_RS10555	NERD domain-containing protein	GSS_RS14090	NERD domain-containing protein	Lacidipiscis_RS02350	NERD domain-containing protein
LAC1533_RS10560	cation:proton antiporter	GSS_RS06610	cation:proton antiporter	Lacidipiscis_RS02355	cation:proton antiporter
LAC1533_RS10565	metallophosphoesterase	GSS_RS06615	metallophosphoesterase	Lacidipiscis_RS02360	metallophosphoesterase
LAC1533_RS10590	XRE family transcriptional regulator	GSS_RS06625	XRE family transcriptional regulator
LAC1533_RS10595	hypothetical protein	GSS_RS06630	hypothetical protein	Lacidipiscis_RS05010	hypothetical protein
LAC1533_RS10600	hypothetical protein	GSS_RS06635	hypothetical protein	Lacidipiscis_RS05015	hypothetical protein
LAC1533_RS10605	serine/threonine transporter SstT	GSS_RS06640	serine/threonine transporter SstT	Lacidipiscis_RS05020	serine/threonine transporter SstT
LAC1533_RS10610	organic hydroperoxide resistance protein	GSS_RS06645	organic hydroperoxide resistance protein	Lacidipiscis_RS05025	organic hydroperoxide resistance protein
LAC1533_RS10615	Cof-type HAD-IIB family hydrolase	GSS_RS06655	Cof-type HAD-IIB family hydrolase	Lacidipiscis_RS05035	Cof-type HAD-IIB family hydrolase
LAC1533_RS10620	nicotinate phosphoribosyltransferase	GSS_RS06660	nicotinate phosphoribosyltransferase	Lacidipiscis_RS05040	nicotinate phosphoribosyltransferase
LAC1533_RS10625	NUDIX domain-containing protein	GSS_RS06665	NUDIX domain-containing protein	Lacidipiscis_RS05045	NUDIX domain-containing protein
LAC1533_RS10630	NADH-flavin reductase	GSS_RS06675	NADH-flavin reductase	Lacidipiscis_RS05050	NADH-flavin reductase
LAC1533_RS10635	hypothetical protein	GSS_RS06680	hypothetical protein	Lacidipiscis_RS05055	hypothetical protein
LAC1533_RS10640	hypothetical protein	GSS_RS06685	hypothetical protein	Lacidipiscis_RS05060	hypothetical protein
LAC1533_RS10645	peptide-methionine (S)-S-oxide reductase	GSS_RS06690	peptide-methionine (S)-S-oxide reductase	Lacidipiscis_RS05065	peptide-methionine (S)-S-oxide reductase
LAC1533_RS10650	thioredoxin	GSS_RS06695	thioredoxin	Lacidipiscis_RS05070	thioredoxin
LAC1533_RS10655	glutathione peroxidase	GSS_RS06700	glutathione peroxidase	Lacidipiscis_RS05075	glutathione peroxidase
LAC1533_RS10660	DUF488 domain-containing protein	GSS_RS06705	DUF488 domain-containing protein	Lacidipiscis_RS05080	DUF488 domain-containing protein
LAC1533_RS10665	N-acetyltransferase	GSS_RS06710	N-acetyltransferase	Lacidipiscis_RS05085	N-acetyltransferase
LAC1533_RS10670	pyruvate oxidase	GSS_RS06715	pyruvate oxidase	Lacidipiscis_RS05095	pyruvate oxidase
LAC1533_RS10685	glutamine ABC transporter substrate-binding protein
LAC1533_RS10690	universal stress protein	GSS_RS06730	universal stress protein	Lacidipiscis_RS05105	universal stress protein
LAC1533_RS10695	CPBP family intramembrane metalloprotease	GSS_RS06735	CPBP family intramembrane metalloprotease	Lacidipiscis_RS05110	CPBP family intramembrane metalloprotease
LAC1533_RS10700	deoxyguanosine kinase	GSS_RS06740	deoxyguanosine kinase	Lacidipiscis_RS05115	deoxyguanosine kinase
LAC1533_RS10705	MFS transporter	GSS_RS06745	MFS transporter	Lacidipiscis_RS05120	MFS transporter
LAC1533_RS10710	MarR family transcriptional regulator	GSS_RS06750	MarR family transcriptional regulator	Lacidipiscis_RS05125	MarR family transcriptional regulator
LAC1533_RS10715	aldo/keto reductase	GSS_RS06755	aldo/keto reductase	Lacidipiscis_RS05130	aldo/keto reductase
LAC1533_RS10720	NAD(P)/FAD-dependent oxidoreductase	GSS_RS06760	NAD(P)/FAD-dependent oxidoreductase	Lacidipiscis_RS05135	NAD(P)/FAD-dependent oxidoreductase
LAC1533_RS10725	5-methyltetrahydropteroyltriglutamate-- homocysteine S-methyltransferase	GSS_RS06765	5-methyltetrahydropteroyltriglutamate-- homocysteine S-methyltransferase	Lacidipiscis_RS05140	5-methyltetrahydropteroyltriglutamate-- homocysteine S-methyltransferase
LAC1533_RS10730	hypothetical protein	GSS_RS06770	hypothetical protein	Lacidipiscis_RS05145	hypothetical protein
LAC1533_RS10735	aluminum resistance protein	GSS_RS06775	aluminum resistance protein	Lacidipiscis_RS05150	aluminum resistance protein
LAC1533_RS10740	hypothetical protein
LAC1533_RS10745	hypothetical protein	GSS_RS06785	hypothetical protein	Lacidipiscis_RS05155	hypothetical protein
LAC1533_RS10755	bifunctional hydroxymethylpyrimidine kinase/phosphomethylpyrimidine kinase	GSS_RS06790	bifunctional hydroxymethylpyrimidine kinase/phosphomethylpyrimidine kinase	Lacidipiscis_RS05160	bifunctional hydroxymethylpyrimidine kinase/phosphomethylpyrimidine kinase
LAC1533_RS10760	penicillin-binding protein 2	GSS_RS06795	penicillin-binding protein 2	Lacidipiscis_RS05165	penicillin-binding protein 2
LAC1533_RS10765	aspartate racemase	GSS_RS06800	aspartate racemase	Lacidipiscis_RS05170	aspartate racemase
LAC1533_RS10770	carboxylate--amine ligase	GSS_RS06805	carboxylate--amine ligase	Lacidipiscis_RS05175	carboxylate--amine ligase
LAC1533_RS10775	UDP-N-acetylmuramoyl-L-alanyl-D-glutamate--2, 6-diaminopimelate ligase	GSS_RS06810	UDP-N-acetylmuramoyl-L-alanyl-D-glutamate--2, 6-diaminopimelate ligase	Lacidipiscis_RS05180	UDP-N-acetylmuramoyl-L-alanyl-D-glutamate--2, 6-diaminopimelate ligase
LAC1533_RS10780	hypothetical protein
LAC1533_RS10785	hypothetical protein	GSS_RS06815	hypothetical protein	Lacidipiscis_RS05185	hypothetical protein
LAC1533_RS10790	universal stress protein	GSS_RS06820	universal stress protein	Lacidipiscis_RS05190	universal stress protein
LAC1533_RS10795	hypothetical protein	GSS_RS06825	hypothetical protein	Lacidipiscis_RS05195	hypothetical protein
LAC1533_RS10800	aldo/keto reductase	GSS_RS06830	aldo/keto reductase	Lacidipiscis_RS05200	aldo/keto reductase
LAC1533_RS10805	peptide ABC transporter substrate-binding protein	GSS_RS06840	peptide ABC transporter substrate-binding protein	Lacidipiscis_RS05205	peptide ABC transporter substrate-binding protein
LAC1533_RS10810	branched-chain amino acid ABC transporter permease	GSS_RS06850	ABC transporter permease	Lacidipiscis_RS05210	branched-chain amino acid ABC transporter permease
LAC1533_RS10815	ABC transporter ATP-binding protein	GSS_RS06855	phosphonate ABC transporter ATP-binding protein	Lacidipiscis_RS05215	ABC transporter ATP-binding protein
LAC1533_RS10820	hypothetical protein	GSS_RS06860	membrane protein	Lacidipiscis_RS08205	hypothetical protein
LAC1533_RS10825	UTP--glucose-1-phosphate uridylyltransferase	GSS_RS06865	UTP--glucose-1-phosphate uridylyltransferase
LAC1533_RS10830	VanZ family protein	GSS_RS06870	VanZ family protein	Lacidipiscis_RS08215	VanZ family protein
LAC1533_RS10835	4-phosphoerythronate dehydrogenase	GSS_RS06875	4-phosphoerythronate dehydrogenase	Lacidipiscis_RS08220	hydroxyacid dehydrogenase
LAC1533_RS10840	transposase
LAC1533_RS10845	hypothetical protein	GSS_RS06880	hypothetical protein	Lacidipiscis_RS08225	hypothetical protein
LAC1533_RS10855	group II intron reverse transcriptase/maturase
LAC1533_RS10865	energy-coupled thiamine transporter ThiT	GSS_RS06885	energy-coupled thiamine transporter ThiT	Lacidipiscis_RS08230	energy-coupled thiamine transporter ThiT
LAC1533_RS10870	energy-coupling factor transporter transmembrane protein EcfT	GSS_RS06890	energy-coupling factor transporter transmembrane protein EcfT	Lacidipiscis_RS08235	energy-coupling factor transporter transmembrane protein EcfT
LAC1533_RS10875	ABC transporter ATP-binding protein	GSS_RS06895	ABC transporter ATP-binding protein	Lacidipiscis_RS08240	ABC transporter ATP-binding protein
LAC1533_RS10880	ABC transporter permease	GSS_RS06900	ABC transporter permease	Lacidipiscis_RS08245	ABC transporter permease
LAC1533_RS10885	PFL family protein	GSS_RS06905	PFL family protein	Lacidipiscis_RS08250	PFL family protein
LAC1533_RS10890	ACT domain-containing protein	GSS_RS06910	ACT domain-containing protein	Lacidipiscis_RS08255	ACT domain-containing protein
LAC1533_RS10895	MFS transporter	GSS_RS06915	MFS transporter	Lacidipiscis_RS08260	MFS transporter
LAC1533_RS10900	N-acetyltransferase	GSS_RS06920	N-acetyltransferase	Lacidipiscis_RS08265	N-acetyltransferase
LAC1533_RS10905	hypothetical protein	GSS_RS13740	hypothetical protein	Lacidipiscis_RS08270	hypothetical protein
LAC1533_RS10910	hypothetical protein	GSS_RS12810	hypothetical protein	Lacidipiscis_RS08275	hypothetical protein
LAC1533_RS10915	hypothetical protein	GSS_RS06930	hypothetical protein	Lacidipiscis_RS08280	hypothetical protein
LAC1533_RS10920	type 1 glutamine amidotransferase	GSS_RS06935	type 1 glutamine amidotransferase	Lacidipiscis_RS08285	type 1 glutamine amidotransferase
LAC1533_RS10925	Rrf2 family transcriptional regulator	GSS_RS06940	Rrf2 family transcriptional regulator	Lacidipiscis_RS08290	Rrf2 family transcriptional regulator
LAC1533_RS10930	hypothetical protein	GSS_RS06945	hypothetical protein	Lacidipiscis_RS08295	NAD(P)-dependent oxidoreductase
LAC1533_RS10935	amino acid ABC transporter permease	GSS_RS06975	amino acid ABC transporter permease	Lacidipiscis_RS08305	amino acid ABC transporter permease
LAC1533_RS10940	amino acid ABC transporter ATP-binding protein	GSS_RS06980	amino acid ABC transporter ATP-binding protein	Lacidipiscis_RS08310	amino acid ABC transporter ATP-binding protein
LAC1533_RS10945	amino acid ABC transporter substrate-binding protein	GSS_RS06985	amino acid ABC transporter substrate-binding protein	Lacidipiscis_RS08315	amino acid ABC transporter substrate-binding protein
LAC1533_RS10950	DUF1541 domain-containing protein	GSS_RS06990	DUF1541 domain-containing protein	Lacidipiscis_RS08915	DUF1541 domain-containing protein
LAC1533_RS10955	PspC domain-containing protein	GSS_RS06995	PspC domain-containing protein	Lacidipiscis_RS08920	PspC domain-containing protein
LAC1533_RS10960	PadR family transcriptional regulator	GSS_RS07000	PadR family transcriptional regulator	Lacidipiscis_RS08925	PadR family transcriptional regulator
LAC1533_RS10965	hypothetical protein	GSS_RS07005	hypothetical protein	Lacidipiscis_RS08930	hypothetical protein
LAC1533_RS10970	DUF1700 domain-containing protein	GSS_RS07010	DUF1700 domain-containing protein	Lacidipiscis_RS08935	DUF1700 domain-containing protein
LAC1533_RS10975	D-alanyl-D-alanine dipeptidase	GSS_RS07020	D-alanyl-D-alanine dipeptidase	Lacidipiscis_RS08940	D-alanyl-D-alanine dipeptidase
LAC1533_RS10985	VOC family protein	GSS_RS07030	VOC family protein	Lacidipiscis_RS08950	VOC family protein
LAC1533_RS10990	MarR family transcriptional regulator	GSS_RS07035	MarR family transcriptional regulator	Lacidipiscis_RS08955	MarR family transcriptional regulator
LAC1533_RS10995	KH domain-containing protein	GSS_RS07040	KH domain-containing protein	Lacidipiscis_RS08960	KH domain-containing protein
LAC1533_RS11000	ribose transporter RbsU	GSS_RS07045	ribose transporter RbsU	Lacidipiscis_RS08965	ribose transporter RbsU
LAC1533_RS11005	D-ribose pyranase	GSS_RS07050	D-ribose pyranase	Lacidipiscis_RS08970	D-ribose pyranase
LAC1533_RS11010	ribokinase	GSS_RS07055	ribokinase	Lacidipiscis_RS08975	ribokinase
LAC1533_RS11015	LacI family transcriptional regulator	GSS_RS12815	hypothetical protein	Lacidipiscis_RS08980	LacI family transcriptional regulator
LAC1533_RS11025	3-oxoacyl-ACP reductase	GSS_RS07070	3-oxoacyl-ACP reductase
LAC1533_RS11030	phosphoenolpyruvate synthase	GSS_RS07075	phosphoenolpyruvate synthase
LAC1533_RS11035	N-acetyltransferase	GSS_RS07080	N-acetyltransferase	Lacidipiscis_RS09275	N-acetyltransferase
LAC1533_RS11045	GNAT family N-acetyltransferase	GSS_RS12820	N-acetyltransferase	Lacidipiscis_RS09285	N-acetyltransferase
LAC1533_RS11055	hypothetical protein	GSS_RS07095	hypothetical protein	Lacidipiscis_RS09290	hypothetical protein
LAC1533_RS11065	cadmium-translocating P-type ATPase	GSS_RS07100	copper-translocating P-type ATPase	Lacidipiscis_RS10910	copper-translocating P-type ATPase
LAC1533_RS11070	cupredoxin domain-containing protein	GSS_RS07105	cupredoxin domain-containing protein	Lacidipiscis_RS10905	cupredoxin domain-containing protein
LAC1533_RS11075	copper-binding protein	GSS_RS07110	copper-binding protein	Lacidipiscis_RS10900	copper-binding protein
LAC1533_RS11080	CopY/TcrY family copper transport repressor	GSS_RS07115	CopY/TcrY family copper transport repressor	Lacidipiscis_RS10895	CopY/TcrY family copper transport repressor
LAC1533_RS11085	aldo/keto reductase	GSS_RS07120	aldo/keto reductase	Lacidipiscis_RS10890	aldo/keto reductase
LAC1533_RS11090	M1 family peptidase	GSS_RS07125	M1 family peptidase	Lacidipiscis_RS10885	M1 family peptidase
LAC1533_RS11095	N-acetyltransferase	GSS_RS07130	N-acetyltransferase	Lacidipiscis_RS10880	N-acetyltransferase
LAC1533_RS11100	hypothetical protein
LAC1533_RS11105	hypothetical protein	GSS_RS14095	hypothetical protein	Lacidipiscis_RS10875	hypothetical protein
LAC1533_RS11110	hypothetical protein	GSS_RS07135	hypothetical protein	Lacidipiscis_RS10870	hypothetical protein
LAC1533_RS11115	KR domain-containing protein	GSS_RS07140	3-oxoacyl-ACP reductase	Lacidipiscis_RS10865	KR domain-containing protein
LAC1533_RS11120	NAD-dependent dehydratase	GSS_RS07145	NAD-dependent dehydratase	Lacidipiscis_RS10860	NAD-dependent dehydratase
LAC1533_RS11125	glycerol dehydrogenase	GSS_RS07150	glycerol dehydrogenase	Lacidipiscis_RS10855	glycerol dehydrogenase
LAC1533_RS11130	glycyl-radical enzyme activating protein	GSS_RS07155	glycyl-radical enzyme activating protein	Lacidipiscis_RS10850	glycyl-radical enzyme activating protein
LAC1533_RS11135	glycyl radical protein	GSS_RS07160	formate C-acetyltransferase/glycerol dehydratase family glycyl radical enzyme	Lacidipiscis_RS10845	formate C-acetyltransferase/glycerol dehydratase family glycyl radical enzyme
LAC1533_RS11140	fructose-bisphosphate aldolase	GSS_RS07165	fructose-bisphosphate aldolase	Lacidipiscis_RS10840	fructose-bisphosphate aldolase
LAC1533_RS11145	peptidase M13	GSS_RS07170	peptidase M13	Lacidipiscis_RS08195	peptidase M13
LAC1533_RS11150	divalent metal cation transporter	GSS_RS07175	divalent metal cation transporter
LAC1533_RS11160	TetR/AcrR family transcriptional regulator	GSS_RS13745	TetR/AcrR family transcriptional regulator	Lacidipiscis_RS08180	TetR/AcrR family transcriptional regulator
LAC1533_RS11165	1-acyl-sn-glycerol-3-phosphate acyltransferase	GSS_RS12835	1-acyl-sn-glycerol-3-phosphate acyltransferase	Lacidipiscis_RS08175	hypothetical protein
LAC1533_RS11170	glycosyl transferase	GSS_RS07195	glycosyl transferase	Lacidipiscis_RS08170	glycosyltransferase family 8 protein
LAC1533_RS11175	glycosyltransferase family 8 protein	GSS_RS07200	glycosyltransferase family 8 protein	Lacidipiscis_RS08165	glycosyltransferase family 8 protein
LAC1533_RS11180	1-acyl-sn-glycerol-3-phosphate acyltransferase			Lacidipiscis_RS08160	1-acyl-sn-glycerol-3-phosphate acyltransferase
LAC1533_RS11185	universal stress protein	GSS_RS07215	universal stress protein	Lacidipiscis_RS08155	universal stress protein
LAC1533_RS11190	hypothetical protein	GSS_RS07220	hypothetical protein	Lacidipiscis_RS08150	hypothetical protein
LAC1533_RS11195	hypothetical protein	GSS_RS09700	hypothetical protein
LAC1533_RS11200	hypothetical protein	GSS_RS07225	hypothetical protein	Lacidipiscis_RS08145	hypothetical protein
LAC1533_RS11210	branched-chain amino acid transporter	GSS_RS14100	branched-chain amino acid transporter	Lacidipiscis_RS08135	AzlD domain-containing protein
LAC1533_RS11220	DoxX family membrane protein	GSS_RS07235	DoxX family membrane protein	Lacidipiscis_RS06850	DoxX family membrane protein
LAC1533_RS11225	hypothetical protein	GSS_RS10775	hypothetical protein	Lacidipiscis_RS06840	hypothetical protein
LAC1533_RS11235	ABC transporter ATP-binding protein	GSS_RS10785	ABC transporter ATP-binding protein	Lacidipiscis_RS06830	ABC transporter ATP-binding protein
LAC1533_RS11240	NAD(P)H-dependent oxidoreductase	GSS_RS10790	NAD(P)H-dependent oxidoreductase	Lacidipiscis_RS06825	NAD(P)H-dependent oxidoreductase
LAC1533_RS11245	carbamate kinase	GSS_RS10795	carbamate kinase	Lacidipiscis_RS06820	carbamate kinase
LAC1533_RS11250	amino acid permease	GSS_RS10800	amino acid permease	Lacidipiscis_RS06815	amino acid permease
LAC1533_RS11255	carbamate kinase	GSS_RS10805	carbamate kinase	Lacidipiscis_RS06810	carbamate kinase
LAC1533_RS11260	ornithine carbamoyltransferase	GSS_RS10810	ornithine carbamoyltransferase	Lacidipiscis_RS06805	ornithine carbamoyltransferase
LAC1533_RS11265	arginine deiminase	GSS_RS10815	arginine deiminase	Lacidipiscis_RS06800	arginine deiminase
LAC1533_RS11270	tRNA ligase	GSS_RS10825	tRNA ligase	Lacidipiscis_RS06795	tRNA ligase
LAC1533_RS11280	hypothetical protein	GSS_RS10050	hypothetical protein
LAC1533_RS11285	GNAT family N-acetyltransferase	GSS_RS13235	GNAT family N-acetyltransferase
LAC1533_RS11295	amino acid permease	GSS_RS10060	amino acid permease	Lacidipiscis_RS03680	amino acid permease
LAC1533_RS11300	hypothetical protein	GSS_RS13240	ArgR family transcriptional regulator	Lacidipiscis_RS03675	hypothetical protein
LAC1533_RS11305	alpha-glucosidase	GSS_RS10075	alpha-glucosidase	Lacidipiscis_RS03670	alpha-glucosidase
LAC1533_RS11310	fructokinase	GSS_RS10080	fructokinase	Lacidipiscis_RS03665	fructokinase
LAC1533_RS11315	glyoxalase	GSS_RS10085	glyoxalase/bleomycin resistance/dioxygenase family protein	Lacidipiscis_RS03660	glyoxalase/bleomycin resistance/dioxygenase family protein
LAC1533_RS11320	PTS glucose transporter subunit IIABC	GSS_RS10090	PTS glucose transporter subunit IIABC
LAC1533_RS11325	hypothetical protein	GSS_RS10095	hypothetical protein
LAC1533_RS11330	SIS domain-containing protein
LAC1533_RS11345	PTS alpha-glucoside transporter subunit IICB
LAC1533_RS11350	6-phospho-alpha-glucosidase
LAC1533_RS11375	mannitol-1-phosphate 5-dehydrogenase			Lacidipiscis_RS07195	mannitol-1-phosphate 5-dehydrogenase
LAC1533_RS11380	PTS mannitol transporter subunit IIA			Lacidipiscis_RS07200	PTS mannitol transporter subunit IIA
LAC1533_RS11385	PTS mannitol transporter subunit IICBA			Lacidipiscis_RS07205	PTS mannitol transporter subunit IICBA
LAC1533_RS11390	esterase family protein			Lacidipiscis_RS07210	esterase family protein
LAC1533_RS11395	PTS fructose transporter subunit IID			Lacidipiscis_RS07215	PTS fructose transporter subunit IID
LAC1533_RS11400	PTS sugar transporter subunit IIC			Lacidipiscis_RS07220	PTS sugar transporter subunit IIC
LAC1533_RS11405	PTS mannose/fructose/sorbose transporter subunit IIB			Lacidipiscis_RS07225	PTS mannose/fructose/sorbose transporter subunit IIB
LAC1533_RS11410	PRD domain-containing protein			Lacidipiscis_RS07230	PRD domain-containing protein
LAC1533_RS11415	hypothetical protein			Lacidipiscis_RS07235	hypothetical protein
LAC1533_RS11420	HTH domain-containing protein			Lacidipiscis_RS09490	HTH domain-containing protein
LAC1533_RS11425	glucosamine-6-phosphate deaminase	GSS_RS10115	glucosamine-6-phosphate deaminase	Lacidipiscis_RS09485	glucosamine-6-phosphate deaminase
LAC1533_RS11430	glutamine--fructose-6-phosphate transaminase (isomerizing)	GSS_RS10120	glutamine--fructose-6-phosphate transaminase (isomerizing)	Lacidipiscis_RS09480	glutamine--fructose-6-phosphate transaminase (isomerizing)
LAC1533_RS11445	ribonucleoside-triphosphate reductase, adenosylcobalamin-dependent	GSS_RS10125	ribonucleoside-triphosphate reductase, adenosylcobalamin-dependent	Lacidipiscis_RS09475	ribonucleoside-triphosphate reductase, adenosylcobalamin-dependent
LAC1533_RS11450	ATP:cob(I)alamin adenosyltransferase	GSS_RS10130	ATP:cob(I)alamin adenosyltransferase	Lacidipiscis_RS09470	ATP:cob(I)alamin adenosyltransferase
LAC1533_RS11455	DUF4430 domain-containing protein	GSS_RS10135	DUF4430 domain-containing protein	Lacidipiscis_RS09465	DUF4430 domain-containing protein
LAC1533_RS11460	aldo/keto reductase	GSS_RS10140	aldo/keto reductase	Lacidipiscis_RS00510	aldo/keto reductase
LAC1533_RS11465	cupin domain-containing protein	GSS_RS10145	cupin domain-containing protein	Lacidipiscis_RS00515	cupin domain-containing protein
LAC1533_RS11470	carboxymuconolactone decarboxylase family protein	GSS_RS10150	carboxymuconolactone decarboxylase family protein	Lacidipiscis_RS00520	carboxymuconolactone decarboxylase family protein
LAC1533_RS11475	DUF2255 domain-containing protein	GSS_RS10155	DUF2255 domain-containing protein	Lacidipiscis_RS00525	DUF2255 domain-containing protein
LAC1533_RS11480	MerR family transcriptional regulator	GSS_RS10160	MerR family transcriptional regulator	Lacidipiscis_RS00530	MerR family transcriptional regulator
LAC1533_RS11490	amino acid ABC transporter ATP-binding protein	GSS_RS10175	amino acid ABC transporter ATP-binding protein
LAC1533_RS11495	bifunctional acetaldehyde-CoA/alcohol dehydrogenase	GSS_RS10180	bifunctional acetaldehyde-CoA/alcohol dehydrogenase	Lacidipiscis_RS00540	bifunctional acetaldehyde-CoA/alcohol dehydrogenase
LAC1533_RS11500	hypothetical protein
LAC1533_RS11505	hypothetical protein	GSS_RS13265	carboxylesterase
LAC1533_RS11510	tRNA uridine-5-carboxymethylaminomethyl(34) synthesis enzyme MnmG	GSS_RS10190	tRNA uridine-5-carboxymethylaminomethyl(34) synthesis enzyme MnmG	Lacidipiscis_RS00500	tRNA uridine-5-carboxymethylaminomethyl(34) synthesis enzyme MnmG
LAC1533_RS11515	tRNA uridine-5-carboxymethylaminomethyl(34) synthesis GTPase MnmE	GSS_RS10195	tRNA uridine-5-carboxymethylaminomethyl(34) synthesis GTPase MnmE	Lacidipiscis_RS00495	tRNA uridine-5-carboxymethylaminomethyl(34) synthesis GTPase MnmE
LAC1533_RS11520	lipoate--protein ligase	GSS_RS10200	lipoate--protein ligase	Lacidipiscis_RS00490	lipoate--protein ligase
LAC1533_RS11525	MFS transporter	GSS_RS10205	MFS transporter	Lacidipiscis_RS00485	MFS transporter
LAC1533_RS11540	hypothetical protein			Lacidipiscis_RS00470	hypothetical protein
LAC1533_RS11555	glycine betaine/L-proline ABC transporter ATP-binding protein			Lacidipiscis_RS00455	glycine betaine/L-proline ABC transporter ATP-binding protein
LAC1533_RS11560	GlsB/YeaQ/YmgE family stress response membrane protein	GSS_RS10230	GlsB/YeaQ/YmgE family stress response membrane protein	Lacidipiscis_RS00450	GlsB/YeaQ/YmgE family stress response membrane protein
LAC1533_RS11565	PTS cellobiose transporter subunit IIC	GSS_RS10235	PTS cellobiose transporter subunit IIC
LAC1533_RS11570	hypothetical protein	GSS_RS10240	hypothetical protein	Lacidipiscis_RS03470	hypothetical protein
LAC1533_RS11580	6-phospho-beta-glucosidase	GSS_RS10245	6-phospho-beta-glucosidase	Lacidipiscis_RS03465	aryl-phospho-beta-D-glucosidase
LAC1533_RS11585	MarR family transcriptional regulator	GSS_RS10250	MarR family transcriptional regulator	Lacidipiscis_RS08700	MarR family transcriptional regulator
LAC1533_RS11590	NAD(P)/FAD-dependent oxidoreductase	GSS_RS03800	NAD(P)/FAD-dependent oxidoreductase	Lacidipiscis_RS08705	NAD(P)/FAD-dependent oxidoreductase
LAC1533_RS11595	DUF3021 domain-containing protein	GSS_RS03795	DUF3021 domain-containing protein	Lacidipiscis_RS08720	DUF3021 domain-containing protein
LAC1533_RS11600	LytTR family transcriptional regulator	GSS_RS03790	LytTR family transcriptional regulator
LAC1533_RS11615	NCS2 family permease	GSS_RS03780	NCS2 family permease
LAC1533_RS11620	DegV family protein	GSS_RS03775	DegV family protein	Lacidipiscis_RS07245	DegV family protein
LAC1533_RS11630	glutamate/aspartate:proton symporter GltP	GSS_RS03770	proton glutamate symport protein	Lacidipiscis_RS07250	glutamate:protein symporter
LAC1533_RS11635	DUF4811 domain-containing protein	GSS_RS03765	DUF4811 domain-containing protein
LAC1533_RS11645	MerR family transcriptional regulator	GSS_RS03755	MerR family transcriptional regulator	Lacidipiscis_RS12730	MerR family transcriptional regulator
LAC1533_RS11650	HAD family hydrolase	GSS_RS11485	HAD family hydrolase	Lacidipiscis_RS12725	HAD family hydrolase
LAC1533_RS11655	CrcB family protein	GSS_RS03750	CrcB family protein	Lacidipiscis_RS00125	CrcB family protein
LAC1533_RS11660	hypothetical protein	GSS_RS03745	camphor resistance protein CrcB	Lacidipiscis_RS04090	hypothetical protein
LAC1533_RS11665	6-phospho-beta-glucosidase	GSS_RS03740	6-phospho-beta-glucosidase	Lacidipiscis_RS04095	6-phospho-beta-glucosidase
LAC1533_RS11670	PTS lactose/cellobiose transporter subunit IIA	GSS_RS03735	PTS lactose/cellobiose transporter subunit IIA	Lacidipiscis_RS04100	PTS lactose/cellobiose transporter subunit IIA
LAC1533_RS11675	PTS sugar transporter subunit IIB	GSS_RS03730	PTS sugar transporter subunit IIB	Lacidipiscis_RS04105	PTS sugar transporter subunit IIB
LAC1533_RS11680	GntR family transcriptional regulator			Lacidipiscis_RS04110	GntR family transcriptional regulator
LAC1533_RS11690	group II intron reverse transcriptase/maturase
LAC1533_RS11700	hypothetical protein
LAC1533_RS11705	nucleotide sugar dehydrogenase			Lacidipiscis_RS02425	nucleotide sugar dehydrogenase
LAC1533_RS11710	hypothetical protein
LAC1533_RS11715	hypothetical protein
LAC1533_RS11720	hypothetical protein
LAC1533_RS11725	hypothetical protein
LAC1533_RS11730	hypothetical protein
LAC1533_RS11735	glycosyltransferase family 2 protein
LAC1533_RS11740	UDP-phosphate N-acetylgalactosaminyl-1-phosphate transferase	GSS_RS03700	sugar transferase	Lacidipiscis_RS00600	UDP-phosphate N-acetylgalactosaminyl-1-phosphate transferase
LAC1533_RS11745	epimerase	GSS_RS03695	epimerase	Lacidipiscis_RS00605	epimerase
LAC1533_RS11750	tyrosine protein phosphatase	GSS_RS03685	tyrosine protein phosphatase	Lacidipiscis_RS00610	hypothetical protein
LAC1533_RS11755	exopolysaccharide biosynthesis protein	GSS_RS03680	exopolysaccharide biosynthesis protein	Lacidipiscis_RS00615	exopolysaccharide biosynthesis protein
LAC1533_RS11760	chain-length determining protein	GSS_RS03675	polysaccharide biosynthesis protein	Lacidipiscis_RS00620	chain-length determining protein
LAC1533_RS11765	serine hydrolase	GSS_RS03670	serine hydrolase	Lacidipiscis_RS00625	serine hydrolase
LAC1533_RS11770	aryl-sulfate sulfotransferase	GSS_RS03665	aryl-sulfate sulfotransferase	Lacidipiscis_RS00635	aryl-sulfate sulfotransferase
LAC1533_RS11775	glucosamine-6-phosphate deaminase	GSS_RS03660	glucosamine-6-phosphate deaminase	Lacidipiscis_RS00640	glucosamine-6-phosphate deaminase
LAC1533_RS11790	type II toxin-antitoxin system PemK/MazF family toxin			Lacidipiscis_RS03220	type II toxin-antitoxin system PemK/MazF family toxin
LAC1533_RS11795	PbsX family transcriptional regulator			Lacidipiscis_RS03225	PbsX family transcriptional regulator
[truncated: 725 more rows]

## Sheet: Supplementary table S4B
Supplementary table S4B. Core-genome among the three L. acidipiscis strains calculated with the EDGAR software.
Lactobacillus acidipiscis ACA-DC 1533		Lactobacillus acidipiscis KCTC 13900		Lactobacillus acidipiscis JCM 10692T
locus_tag	annotated function	locus_tag	annotated function	locus_tag	annotated function
LAC1533_RS00005	chromosomal replication initiator protein DnaA	GSS_RS03115	chromosomal replication initiator protein DnaA	Lacidipiscis_RS10985	chromosomal replication initiator protein DnaA
LAC1533_RS00010	DNA polymerase III subunit beta	GSS_RS03110	DNA polymerase III subunit beta	Lacidipiscis_RS10990	DNA polymerase III subunit beta
LAC1533_RS00015	S4 domain-containing protein YaaA	GSS_RS03105	S4 domain-containing protein YaaA	Lacidipiscis_RS10995	S4 domain-containing protein YaaA
LAC1533_RS00020	DNA replication and repair protein RecF	GSS_RS03100	DNA replication and repair protein RecF	Lacidipiscis_RS11000	DNA replication and repair protein RecF
LAC1533_RS00025	DNA topoisomerase (ATP-hydrolyzing) subunit B	GSS_RS03095	DNA topoisomerase (ATP-hydrolyzing) subunit B	Lacidipiscis_RS11005	DNA topoisomerase (ATP-hydrolyzing) subunit B
LAC1533_RS00030	DNA gyrase subunit A	GSS_RS03090	DNA gyrase subunit A	Lacidipiscis_RS11010	DNA gyrase subunit A
LAC1533_RS00035	30S ribosomal protein S6	GSS_RS03085	30S ribosomal protein S6	Lacidipiscis_RS11015	30S ribosomal protein S6
LAC1533_RS00040	single-stranded DNA-binding protein	GSS_RS03080	single-stranded DNA-binding protein	Lacidipiscis_RS11020	single-stranded DNA-binding protein
LAC1533_RS00045	30S ribosomal protein S18	GSS_RS03075	30S ribosomal protein S18	Lacidipiscis_RS11025	30S ribosomal protein S18
LAC1533_RS00050	GntR family transcriptional regulator	GSS_RS03070	GntR family transcriptional regulator	Lacidipiscis_RS11030	GntR family transcriptional regulator
LAC1533_RS00060	PTS mannose/fructose/sorbose transporter subunit IIB	GSS_RS03060	PTS mannose/fructose/sorbose transporter subunit IIB	Lacidipiscis_RS11050	PTS mannose/fructose/sorbose transporter subunit IIB
LAC1533_RS00075	PTS fructose transporter subunit IIA	GSS_RS03045	PTS fructose transporter subunit IIA	Lacidipiscis_RS11055	hypothetical protein
LAC1533_RS00080	SIS domain-containing protein	GSS_RS03040	SIS domain-containing protein	Lacidipiscis_RS11060	SIS domain-containing protein
LAC1533_RS00090	DeoR/GlpR transcriptional regulator	GSS_RS03030	DeoR/GlpR transcriptional regulator	Lacidipiscis_RS11070	DeoR/GlpR transcriptional regulator
LAC1533_RS00095	ABC transporter ATP-binding protein	GSS_RS03025	ABC transporter ATP-binding protein	Lacidipiscis_RS11075	ABC transporter ATP-binding protein
LAC1533_RS00105	GntR family transcriptional regulator	GSS_RS03015	GntR family transcriptional regulator	Lacidipiscis_RS11085	GntR family transcriptional regulator
LAC1533_RS00110	ABC transporter ATP-binding protein	GSS_RS03010	ABC transporter ATP-binding protein	Lacidipiscis_RS11090	ABC transporter ATP-binding protein
LAC1533_RS00115	hypothetical protein	GSS_RS03005	hypothetical protein	Lacidipiscis_RS11095	hypothetical protein
LAC1533_RS00120	DHH family phosphoesterase	GSS_RS03000	DHH family phosphoesterase	Lacidipiscis_RS11100	DHH family phosphoesterase
LAC1533_RS00125	50S ribosomal protein L9	GSS_RS02995	50S ribosomal protein L9	Lacidipiscis_RS11105	50S ribosomal protein L9
LAC1533_RS00130	replicative DNA helicase	GSS_RS02990	replicative DNA helicase	Lacidipiscis_RS11110	replicative DNA helicase
LAC1533_RS00150	phosphate/phosphite/phosphonate ABC transporter substrate-binding protein	GSS_RS02985	phosphate/phosphite/phosphonate ABC transporter substrate-binding protein	Lacidipiscis_RS11115	phosphate/phosphite/phosphonate ABC transporter substrate-binding protein
LAC1533_RS00155	phosphonate ABC transporter ATP-binding protein	GSS_RS02980	phosphonate ABC transporter ATP-binding protein	Lacidipiscis_RS11120	phosphonate ABC transporter ATP-binding protein
LAC1533_RS00160	phosphonate ABC transporter, permease protein PhnE	GSS_RS02975	phosphonate ABC transporter, permease protein PhnE	Lacidipiscis_RS11125	phosphonate ABC transporter, permease protein PhnE
LAC1533_RS00165	phosphonate ABC transporter, permease protein PhnE	GSS_RS02970	phosphonate ABC transporter, permease protein PhnE	Lacidipiscis_RS11130	phosphonate ABC transporter, permease protein PhnE
LAC1533_RS00170	bifunctional metallophosphatase/5-nucleotidase	GSS_RS02965	bifunctional metallophosphatase/5-nucleotidase	Lacidipiscis_RS11135	bifunctional metallophosphatase/5-nucleotidase
LAC1533_RS00185	DUF4867 domain-containing protein	GSS_RS02960	DUF4867 domain-containing protein	Lacidipiscis_RS11145	DUF4867 domain-containing protein
LAC1533_RS00190	tagatose-6-phosphate kinase	GSS_RS02955	tagatose-6-phosphate kinase	Lacidipiscis_RS11150	tagatose-6-phosphate kinase
LAC1533_RS00195	PTS sugar transporter subunit IIA	GSS_RS02950	PTS sugar transporter subunit IIA	Lacidipiscis_RS11155	PTS sugar transporter subunit IIA
LAC1533_RS00200	PTS fructose transporter subunit IIB	GSS_RS02945	PTS fructose transporter subunit IIB	Lacidipiscis_RS11160	PTS fructose transporter subunit IIB
LAC1533_RS00205	PTS glucitol transporter subunit IIA	GSS_RS02940	PTS glucitol transporter subunit IIA	Lacidipiscis_RS11165	PTS glucitol transporter subunit IIA
LAC1533_RS00210	hypothetical protein	GSS_RS02935	hypothetical protein	Lacidipiscis_RS11170	hypothetical protein
LAC1533_RS00215	DeoR/GlpR transcriptional regulator	GSS_RS02930	DeoR/GlpR transcriptional regulator	Lacidipiscis_RS11175	DeoR/GlpR transcriptional regulator
LAC1533_RS00220	galactose-6-phosphate isomerase subunit LacA	GSS_RS02925	galactose-6-phosphate isomerase subunit LacA	Lacidipiscis_RS11180	galactose-6-phosphate isomerase subunit LacA
LAC1533_RS00225	galactose-6-phosphate isomerase subunit LacB	GSS_RS02920	galactose-6-phosphate isomerase subunit LacB	Lacidipiscis_RS11185	galactose-6-phosphate isomerase subunit LacB
LAC1533_RS00230	tagatose-bisphosphate aldolase	GSS_RS02915	tagatose-bisphosphate aldolase	Lacidipiscis_RS11190	tagatose-bisphosphate aldolase
LAC1533_RS00300 IDENTICAL PARALOGS LAC1533_RS09250	IS30 family transposase	GSS_RS11500	IS30 family transposase	Lacidipiscis_RS04130	IS30 family transposase
LAC1533_RS00330	butanediol dehydrogenase	GSS_RS02865	butanediol dehydrogenase	Lacidipiscis_RS02750	butanediol dehydrogenase
LAC1533_RS00335	LysR family transcriptional regulator	GSS_RS02860	LysR family transcriptional regulator	Lacidipiscis_RS02755	LysR family transcriptional regulator
LAC1533_RS00340	class II fumarate hydratase	GSS_RS02855	class II fumarate hydratase	Lacidipiscis_RS02760	class II fumarate hydratase
LAC1533_RS00345	flavocytochrome c	GSS_RS02850	flavocytochrome c	Lacidipiscis_RS02765	flavocytochrome c
LAC1533_RS00350	anion permease	GSS_RS02845	anion permease	Lacidipiscis_RS02770	anion permease
LAC1533_RS00360	FAD-binding protein	GSS_RS02835	FAD-binding protein	Lacidipiscis_RS02780	FAD-binding protein
LAC1533_RS00365	SDR family NAD(P)-dependent oxidoreductase	GSS_RS02830	SDR family NAD(P)-dependent oxidoreductase	Lacidipiscis_RS02785	SDR family NAD(P)-dependent oxidoreductase
LAC1533_RS00370	FAD-binding protein	GSS_RS02825	FAD-binding protein	Lacidipiscis_RS02790	FAD-binding protein
LAC1533_RS00390	aldo/keto reductase	GSS_RS02805	aldo/keto reductase	Lacidipiscis_RS02800	aldo/keto reductase
LAC1533_RS00395	NAD(P)-dependent oxidoreductase	GSS_RS02800	NAD(P)-dependent oxidoreductase	Lacidipiscis_RS02805	NAD(P)-dependent oxidoreductase
LAC1533_RS00400	L-lactate oxidase	GSS_RS02795	L-lactate oxidase	Lacidipiscis_RS02810	L-lactate oxidase
LAC1533_RS00410	LacI family DNA-binding transcriptional regulator	GSS_RS02785	LacI family DNA-binding transcriptional regulator	Lacidipiscis_RS02820	LacI family DNA-binding transcriptional regulator
LAC1533_RS00415	FAD-binding protein	GSS_RS02780	FAD-binding protein	Lacidipiscis_RS02825	FAD-binding protein
LAC1533_RS00420	FAD-binding protein	GSS_RS02775	FAD-binding protein	Lacidipiscis_RS02830	FAD-binding protein
LAC1533_RS00425	hypothetical protein	GSS_RS02770	hypothetical protein	Lacidipiscis_RS02835	hypothetical protein
LAC1533_RS00430	FAD-binding protein	GSS_RS02765	FAD-binding protein	Lacidipiscis_RS02840	FAD-binding protein
LAC1533_RS00495 IDENTICAL PARALOGS LAC1533_RS05535 IDENTICAL PARALOGS LAC1533_RS06750	IS30 family transposase	GSS_RS11395	IS30 family transposase	Lacidipiscis_RS08455	IS30 family transposase
LAC1533_RS00560	AEC family transporter	GSS_RS02670	AEC family transporter	Lacidipiscis_RS02850	AEC family transporter
LAC1533_RS00565	hypothetical protein	GSS_RS02665	hypothetical protein	Lacidipiscis_RS02855	hypothetical protein
LAC1533_RS00570	adenylosuccinate synthase	GSS_RS02660	adenylosuccinate synthase	Lacidipiscis_RS02860	adenylosuccinate synthase
LAC1533_RS00585	ISL3 family transposase	GSS_RS02655	ISL3 family transposase	Lacidipiscis_RS02050	ISL3 family transposase
LAC1533_RS00590	formate C-acetyltransferase	GSS_RS02645	formate C-acetyltransferase	Lacidipiscis_RS02055	formate C-acetyltransferase
LAC1533_RS00595	pyruvate formate lyase-activating protein	GSS_RS02640	pyruvate formate lyase-activating protein	Lacidipiscis_RS02060	pyruvate formate lyase-activating protein
LAC1533_RS00605 IDENTICAL PARALOGS LAC1533_RS01135 IDENTICAL PARALOGS LAC1533_RS02865 IDENTICAL PARALOGS LAC1533_RS03470 IDENTICAL PARALOGS LAC1533_RS03575 IDENTICAL PARALOGS LAC1533_RS08020	ISL3 family transposase	GSS_RS11420	ISL3 family transposase	Lacidipiscis_RS03185	ISL3 family transposase
LAC1533_RS00610	zinc-binding alcohol dehydrogenase family protein	GSS_RS02630	zinc-binding alcohol dehydrogenase family protein	Lacidipiscis_RS02065	zinc-binding alcohol dehydrogenase family protein
LAC1533_RS00640	2-hydroxyacid dehydrogenase	GSS_RS02600	2-hydroxyacid dehydrogenase	Lacidipiscis_RS07565	hydroxyacid dehydrogenase
LAC1533_RS00645	hypothetical protein	GSS_RS02595	hypothetical protein	Lacidipiscis_RS07570	hypothetical protein
LAC1533_RS00650 IDENTICAL PARALOGS LAC1533_RS09450 IDENTICAL PARALOGS LAC1533_RS12185	IS982 family transposase ISLpl4	GSS_RS11510	IS982 family transposase ISLpl4	Lacidipiscis_RS05750	IS982 family transposase ISLpl4
LAC1533_RS00655	adenine deaminase	GSS_RS12385	adenine deaminase	Lacidipiscis_RS07585	adenine deaminase
LAC1533_RS00665	metal ABC transporter substrate-binding protein	GSS_RS02585	metal ABC transporter substrate-binding protein	Lacidipiscis_RS07590	metal ABC transporter substrate-binding protein
LAC1533_RS00670	30S ribosomal protein S14	GSS_RS02580	30S ribosomal protein S14	Lacidipiscis_RS07595	30S ribosomal protein S14
LAC1533_RS00675	cysteine synthase family protein	GSS_RS02575	cysteine synthase family protein	Lacidipiscis_RS11450	hypothetical protein
LAC1533_RS00680	PLP-dependent transferase	GSS_RS02570	PLP-dependent transferase	Lacidipiscis_RS11455	PLP-dependent transferase
LAC1533_RS00685	serine acetyltransferase	GSS_RS02565	serine acetyltransferase	Lacidipiscis_RS11460	serine acetyltransferase
LAC1533_RS00690	acyl-CoA thioesterase	GSS_RS02560	acyl-CoA thioesterase	Lacidipiscis_RS11465	acyl-CoA thioesterase
LAC1533_RS00695	threonine/serine exporter	GSS_RS02555	threonine/serine exporter	Lacidipiscis_RS11470	threonine/serine exporter
LAC1533_RS00700	threonine/serine exporter	GSS_RS02550	threonine/serine exporter	Lacidipiscis_RS11475	threonine/serine exporter
LAC1533_RS00705	NupC/NupG family nucleoside CNT transporter	GSS_RS02545	nucleoside transporter	Lacidipiscis_RS11480	nucleoside permease
LAC1533_RS00710	NCS2 family permease	GSS_RS02540	NCS2 family permease	Lacidipiscis_RS11485	NCS2 family permease
LAC1533_RS00715	EAL domain-containing protein	GSS_RS12380	EAL domain-containing protein	Lacidipiscis_RS11490	hypothetical protein
LAC1533_RS00725	hypothetical protein	GSS_RS02525	hypothetical protein	Lacidipiscis_RS11495	hypothetical protein
LAC1533_RS00750	peptide ABC transporter substrate-binding protein	GSS_RS02510	peptide ABC transporter substrate-binding protein	Lacidipiscis_RS12325	peptide ABC transporter substrate-binding protein
LAC1533_RS00755	peroxide stress protein YaaA	GSS_RS02505	peroxide stress protein YaaA	Lacidipiscis_RS12320	peroxide stress protein YaaA
LAC1533_RS00760	hypothetical protein	GSS_RS02495	hypothetical protein	Lacidipiscis_RS12315	hypothetical protein
LAC1533_RS00770	NADPH:quinone reductase	GSS_RS02485	NADPH:quinone reductase	Lacidipiscis_RS12305	NADPH:quinone reductase
LAC1533_RS00775	YitT family protein	GSS_RS02480	YitT family protein	Lacidipiscis_RS12300	YitT family protein
LAC1533_RS00780	APC family permease	GSS_RS02475	APC family permease	Lacidipiscis_RS12295	APC family permease
LAC1533_RS00785	ornithine decarboxylase	GSS_RS02470	ornithine decarboxylase	Lacidipiscis_RS12290	ornithine decarboxylase
LAC1533_RS00790	hypothetical protein	GSS_RS13990	hypothetical protein	Lacidipiscis_RS12285	hypothetical protein
LAC1533_RS00795	hypothetical protein	GSS_RS13670	hypothetical protein	Lacidipiscis_RS12280	hypothetical protein
LAC1533_RS00800	DUF2992 domain-containing protein	GSS_RS02455	DUF2992 domain-containing protein	Lacidipiscis_RS12275	DUF2992 domain-containing protein
LAC1533_RS00840	TetR/AcrR family transcriptional regulator	GSS_RS02430	TetR/AcrR family transcriptional regulator	Lacidipiscis_RS00720	TetR/AcrR family transcriptional regulator
LAC1533_RS00845	ABC transporter permease	GSS_RS02425	ABC transporter permease	Lacidipiscis_RS00725	ABC transporter permease
LAC1533_RS00850	ABC transporter ATP-binding protein	GSS_RS02420	ABC transporter ATP-binding protein	Lacidipiscis_RS07105	ABC transporter ATP-binding protein
LAC1533_RS00855	dihydroxyacetone kinase subunit DhaK	GSS_RS02415	dihydroxyacetone kinase subunit DhaK	Lacidipiscis_RS00735	dihydroxyacetone kinase subunit DhaK
LAC1533_RS00865	PTS-dependent dihydroxyacetone kinase phosphotransferase subunit DhaM	GSS_RS02405	PTS-dependent dihydroxyacetone kinase phosphotransferase subunit DhaM	Lacidipiscis_RS00745	PTS-dependent dihydroxyacetone kinase phosphotransferase subunit DhaM
LAC1533_RS00870	glycerol kinase	GSS_RS02400	glycerol kinase	Lacidipiscis_RS00750	glycerol kinase
LAC1533_RS00875	type 1 glycerol-3-phosphate oxidase	GSS_RS02395	type 1 glycerol-3-phosphate oxidase	Lacidipiscis_RS00755	type 1 glycerol-3-phosphate oxidase
LAC1533_RS00880	aquaporin family protein	GSS_RS02390	aquaporin family protein	Lacidipiscis_RS00760	aquaporin family protein
LAC1533_RS00885	GntR family transcriptional regulator	GSS_RS02385	GntR family transcriptional regulator	Lacidipiscis_RS00765	GntR family transcriptional regulator
LAC1533_RS00890	PTS sugar transporter subunit IIC	GSS_RS02380	PTS sugar transporter subunit IIC	Lacidipiscis_RS00770	PTS sugar transporter subunit IIC
LAC1533_RS00895	DUF3284 domain-containing protein	GSS_RS02375	DUF3284 domain-containing protein	Lacidipiscis_RS00775	DUF3284 domain-containing protein
LAC1533_RS00915	hypothetical protein	GSS_RS13980	hypothetical protein	Lacidipiscis_RS00790	PTS sugar transporter subunit IIB
LAC1533_RS00920	GNAT family N-acetyltransferase	GSS_RS13665	GNAT family N-acetyltransferase	Lacidipiscis_RS00795	GNAT family N-acetyltransferase
LAC1533_RS00940	DUF3290 domain-containing protein	GSS_RS02345	DUF3290 domain-containing protein	Lacidipiscis_RS00805	DUF3290 domain-containing protein
LAC1533_RS00945	DUF421 domain-containing protein	GSS_RS02340	DUF421 domain-containing protein	Lacidipiscis_RS00715	DUF421 domain-containing protein
LAC1533_RS00950	hypothetical protein	GSS_RS12335	cytidyltransferase-like domain-containing protein	Lacidipiscis_RS09390	hypothetical protein
LAC1533_RS00955	LysR family transcriptional regulator	GSS_RS13655	LysR family transcriptional regulator	Lacidipiscis_RS09385	LysR family transcriptional regulator
LAC1533_RS00960	glycerol kinase	GSS_RS02320	glycerol kinase	Lacidipiscis_RS09380	glycerol kinase
LAC1533_RS00965	glycerol-3-phosphate dehydrogenase/oxidase	GSS_RS02315	glycerol-3-phosphate dehydrogenase/oxidase	Lacidipiscis_RS09375	glycerol-3-phosphate dehydrogenase/oxidase
LAC1533_RS00970	hypothetical protein	GSS_RS12325	hypothetical protein	Lacidipiscis_RS09370	hypothetical protein
LAC1533_RS00990	glutamate ABC transporter substrate-binding protein	GSS_RS02290	glutamate ABC transporter substrate-binding protein	Lacidipiscis_RS00875	glutamate ABC transporter substrate-binding protein
LAC1533_RS00995	amino acid ABC transporter permease	GSS_RS02285	amino acid ABC transporter permease	Lacidipiscis_RS00880	amino acid ABC transporter permease
LAC1533_RS01000	aspartate aminotransferase	GSS_RS02280	aspartate aminotransferase	Lacidipiscis_RS00885	aspartate aminotransferase
LAC1533_RS01005	lactate dehydrogenase	GSS_RS02275	lactate dehydrogenase	Lacidipiscis_RS00890	lactate dehydrogenase
LAC1533_RS01010	ZIP family metal transporter	GSS_RS02270	ZIP family metal transporter	Lacidipiscis_RS00895	ZIP family metal transporter
LAC1533_RS01020	histidine phosphatase family protein	GSS_RS02260	histidine phosphatase family protein	Lacidipiscis_RS00905	histidine phosphatase family protein
LAC1533_RS01025	N-acetyltransferase	GSS_RS02255	N-acetyltransferase	Lacidipiscis_RS00910	N-acetyltransferase
LAC1533_RS01030	glycosyltransferase family 8 protein	GSS_RS02250	glycosyltransferase family 8 protein	Lacidipiscis_RS00915	glycosyltransferase family 8 protein
LAC1533_RS01040	hypothetical protein	GSS_RS02240	hypothetical protein	Lacidipiscis_RS00925	hypothetical protein
LAC1533_RS01045	hypothetical protein	GSS_RS02235	membrane protein	Lacidipiscis_RS00930	hypothetical protein
LAC1533_RS01050	pyridoxal kinase	GSS_RS02230	pyridoxal kinase	Lacidipiscis_RS00935	pyridoxal kinase
LAC1533_RS01055	DNA-binding response regulator	GSS_RS02225	DNA-binding response regulator	Lacidipiscis_RS00940	DNA-binding response regulator
LAC1533_RS01060	cell wall metabolism sensor histidine kinase WalK	GSS_RS02220	cell wall metabolism sensor histidine kinase WalK	Lacidipiscis_RS00945	cell wall metabolism sensor histidine kinase WalK
LAC1533_RS01065	hypothetical protein	GSS_RS02215	hypothetical protein	Lacidipiscis_RS00950	hypothetical protein
LAC1533_RS01070	hypothetical protein	GSS_RS02210	hypothetical protein	Lacidipiscis_RS00955	hypothetical protein
LAC1533_RS01075	DUF1634 domain-containing protein	GSS_RS02205	DUF1634 domain-containing protein	Lacidipiscis_RS06485	DUF1634 domain-containing protein
LAC1533_RS01080	sulfite exporter TauE/SafE family protein	GSS_RS02200	sulfite exporter TauE/SafE family protein	Lacidipiscis_RS06490	sulfite exporter TauE/SafE family protein
LAC1533_RS01085	MBL fold metallo-hydrolase	GSS_RS02195	MBL fold metallo-hydrolase	Lacidipiscis_RS06495	MBL fold metallo-hydrolase
LAC1533_RS01090	PDZ domain-containing protein	GSS_RS02190	PDZ domain-containing protein	Lacidipiscis_RS12675	PDZ domain-containing protein
LAC1533_RS01095 IDENTICAL PARALOGS LAC1533_RS01980 IDENTICAL PARALOGS LAC1533_RS08320 IDENTICAL PARALOGS LAC1533_RS10275 IDENTICAL PARALOGS LAC1533_RS11335	IS30 family transposase	GSS_RS11460	IS30 family transposase	Lacidipiscis_RS11325 IDENTICAL PARALOGS Lacidipiscis_RS08300	IS30 family transposase
LAC1533_RS01100	23S rRNA (pseudouridine(1915)-N(3))-methyltransferase RlmH	GSS_RS02185	23S rRNA (pseudouridine(1915)-N(3))-methyltransferase RlmH	Lacidipiscis_RS08660	23S rRNA (pseudouridine(1915)-N(3))-methyltransferase RlmH
LAC1533_RS01145	DUF1516 domain-containing protein	GSS_RS02145	DUF1516 domain-containing protein	Lacidipiscis_RS08665	DUF1516 domain-containing protein
LAC1533_RS01160	membrane protein	GSS_RS02130	membrane protein	Lacidipiscis_RS00200	hypothetical protein
LAC1533_RS01165	ClC family H(+)/Cl(-) exchange transporter	GSS_RS02125	ClC family H(+)/Cl(-) exchange transporter	Lacidipiscis_RS00205	ClC family H(+)/Cl(-) exchange transporter
LAC1533_RS01170	ATPase	GSS_RS02120	MoxR-like ATPase	Lacidipiscis_RS00210	ATPase
LAC1533_RS01175	hypothetical protein	GSS_RS02115	hypothetical protein	Lacidipiscis_RS00215	hypothetical protein
LAC1533_RS01180	hypothetical protein	GSS_RS02110	hypothetical protein	Lacidipiscis_RS00220	hypothetical protein
LAC1533_RS01185	hypothetical protein	GSS_RS02105	hypothetical protein	Lacidipiscis_RS00225	hypothetical protein
LAC1533_RS01190	NADPH-dependent oxidoreductase	GSS_RS02100	NADPH-dependent oxidoreductase	Lacidipiscis_RS00230	NADPH-dependent oxidoreductase
LAC1533_RS01195	hypothetical protein	GSS_RS02095	hypothetical protein	Lacidipiscis_RS00235	hypothetical protein
LAC1533_RS01210	MFS transporter	GSS_RS02080	MFS transporter	Lacidipiscis_RS00255	MFS transporter
LAC1533_RS01215	50S ribosomal protein L4	GSS_RS13970	50S ribosomal protein L4	Lacidipiscis_RS00250	50S ribosomal protein L4
LAC1533_RS01230	amino acid permease	GSS_RS02075	amino acid permease	Lacidipiscis_RS00260	amino acid permease
LAC1533_RS01235	aspartate aminotransferase family protein	GSS_RS02070	aspartate aminotransferase family protein	Lacidipiscis_RS00265	4-aminobutyrate aminotransferase
LAC1533_RS01240	hypothetical protein	GSS_RS02065	hypothetical protein	Lacidipiscis_RS00280	hypothetical protein
LAC1533_RS01245	ABC transporter substrate-binding protein	GSS_RS02060	inosine-uridine nucleoside N-ribohydrolase	Lacidipiscis_RS00285	ABC transporter substrate-binding protein
LAC1533_RS01250	glycine betaine/L-proline ABC transporter ATP-binding protein	GSS_RS02055	glycine betaine/L-proline ABC transporter ATP-binding protein	Lacidipiscis_RS00290	glycine betaine/L-proline ABC transporter ATP-binding protein
LAC1533_RS01255 IDENTICAL PARALOGS LAC1533_RS11550	glycine/betaine ABC transporter	GSS_RS13385	glycine/betaine ABC transporter	Lacidipiscis_RS00295	glycine/betaine ABC transporter
LAC1533_RS01260 IDENTICAL PARALOGS LAC1533_RS11545	glycine/betaine ABC transporter	GSS_RS11315	glycine/betaine ABC transporter	Lacidipiscis_RS00465	glycine/betaine ABC transporter
LAC1533_RS01270	glycosyltransferase family 1 protein	GSS_RS02050	glycosyltransferase family 1 protein	Lacidipiscis_RS00310	glycosyltransferase family 1 protein
LAC1533_RS01290	magnesium transporter CorA family protein	GSS_RS02040	magnesium transporter CorA family protein	Lacidipiscis_RS00320	magnesium transporter CorA family protein
LAC1533_RS01295	Cof-type HAD-IIB family hydrolase	GSS_RS02035	Cof-type HAD-IIB family hydrolase	Lacidipiscis_RS00325	Cof-type HAD-IIB family hydrolase
LAC1533_RS01300	flavoprotein	GSS_RS02030	flavoprotein	Lacidipiscis_RS00330	NADPH-dependent FMN reductase
LAC1533_RS01370	DUF1648 domain-containing protein	GSS_RS01970	DUF1648 domain-containing protein	Lacidipiscis_RS00350	DUF1648 domain-containing protein
LAC1533_RS01375	YhgE/Pip domain-containing protein	GSS_RS01965	YhgE/Pip domain-containing protein	Lacidipiscis_RS00355	YhgE/Pip domain-containing protein
LAC1533_RS01380	PAP2 family protein	GSS_RS01955	PAP2 family protein	Lacidipiscis_RS00360	PAP2 family protein
LAC1533_RS01385	patatin family protein	GSS_RS01950	patatin family protein	Lacidipiscis_RS00365	patatin family protein
LAC1533_RS01395	hypothetical protein	GSS_RS01940	hypothetical protein	Lacidipiscis_RS00375	hypothetical protein
LAC1533_RS01400	LysM domain-containing protein	GSS_RS01930	LysM domain-containing protein	Lacidipiscis_RS00380	LysM peptidoglycan-binding domain-containing protein
LAC1533_RS01405	aspartate kinase	GSS_RS01925	aspartate kinase	Lacidipiscis_RS00385	aspartate kinase
LAC1533_RS01410	phosphatidylglycerophosphatase A	GSS_RS01920	phosphatidylglycerophosphatase A	Lacidipiscis_RS00390	phosphatidylglycerophosphatase A
LAC1533_RS01415	hydrolase	GSS_RS01915	hydrolase	Lacidipiscis_RS00395	hydrolase
LAC1533_RS01420	L-lactate dehydrogenase	GSS_RS01910	L-lactate dehydrogenase	Lacidipiscis_RS00400	L-lactate dehydrogenase
LAC1533_RS01425	branched-chain amino acid aminotransferase	GSS_RS01905	branched-chain amino acid aminotransferase	Lacidipiscis_RS00405	branched-chain amino acid aminotransferase
LAC1533_RS01430	resolvase	GSS_RS12285	resolvase	Lacidipiscis_RS00410	resolvase
LAC1533_RS01440	alpha-glucosidase	GSS_RS01890	alpha-glucosidase	Lacidipiscis_RS00420	alpha-glucosidase
LAC1533_RS01445	PTS sugar transporter subunit IIC	GSS_RS01885	PTS sugar transporter subunit IIC	Lacidipiscis_RS00425	PTS sugar transporter subunit IIC
LAC1533_RS01450	sugar O-acetyltransferase	GSS_RS01880	sugar O-acetyltransferase	Lacidipiscis_RS00430	sugar O-acetyltransferase
LAC1533_RS01455	N-acetyltransferase	GSS_RS01875	N-acetyltransferase	Lacidipiscis_RS00435	N-acetyltransferase
LAC1533_RS01470	hypothetical protein	GSS_RS01870	hypothetical protein	Lacidipiscis_RS07705	hypothetical protein
LAC1533_RS01475	hypothetical protein	GSS_RS01865	hypothetical protein	Lacidipiscis_RS07710	hypothetical protein
LAC1533_RS01480	ATPase	GSS_RS01860	ATPase	Lacidipiscis_RS07715	ATPase
LAC1533_RS01485	DUF3862 domain-containing protein	GSS_RS01855	DUF3862 domain-containing protein	Lacidipiscis_RS07720	DUF3862 domain-containing protein
LAC1533_RS01540	hypothetical protein	GSS_RS01810	hypothetical protein	Lacidipiscis_RS07770	hypothetical protein
LAC1533_RS01550	flavocytochrome c	GSS_RS01800	flavocytochrome c	Lacidipiscis_RS07780	flavocytochrome c
LAC1533_RS01555	dipeptide epimerase	GSS_RS01795	dipeptide epimerase	Lacidipiscis_RS07785	dipeptide epimerase
LAC1533_RS01570	oleate hydratase	GSS_RS01785	oleate hydratase	Lacidipiscis_RS07795	oleate hydratase
LAC1533_RS01585	hypothetical protein	GSS_RS01770	hypothetical protein	Lacidipiscis_RS07810	hypothetical protein
LAC1533_RS01590	NUDIX domain-containing protein	GSS_RS01765	NUDIX domain-containing protein	Lacidipiscis_RS07815	NUDIX domain-containing protein
LAC1533_RS01595	MFS transporter	GSS_RS01760	MFS transporter	Lacidipiscis_RS07820	MFS transporter
LAC1533_RS01600	phosphoglycolate phosphatase	GSS_RS01755	phosphoglycolate phosphatase	Lacidipiscis_RS07825	HAD family hydrolase
LAC1533_RS01605	NADP-specific glutamate dehydrogenase	GSS_RS01750	NADP-specific glutamate dehydrogenase	Lacidipiscis_RS07830	NADP-specific glutamate dehydrogenase
LAC1533_RS01610	NADP oxidoreductase	GSS_RS12250	NADP oxidoreductase	Lacidipiscis_RS08855	NADP oxidoreductase
LAC1533_RS01615	LLM class flavin-dependent oxidoreductase	GSS_RS01740	LLM class flavin-dependent oxidoreductase	Lacidipiscis_RS08860	LLM class flavin-dependent oxidoreductase
LAC1533_RS01630	2-hydroxyacid dehydrogenase	GSS_RS01735	2-hydroxyacid dehydrogenase	Lacidipiscis_RS08865	hydroxyacid dehydrogenase
LAC1533_RS01635	Hsp20/alpha crystallin family protein	GSS_RS01730	Hsp20/alpha crystallin family protein	Lacidipiscis_RS08870	Hsp20/alpha crystallin family protein
LAC1533_RS01640	GNAT family N-acetyltransferase	GSS_RS01725	GNAT family N-acetyltransferase	Lacidipiscis_RS08875	GNAT family N-acetyltransferase
LAC1533_RS01645	hypothetical protein	GSS_RS01720	hypothetical protein	Lacidipiscis_RS08880	hypothetical protein
LAC1533_RS01650	hypothetical protein	GSS_RS01715	hypothetical protein	Lacidipiscis_RS08885	hypothetical protein
LAC1533_RS01665	hypothetical protein	GSS_RS01700	hypothetical protein	Lacidipiscis_RS04820	hypothetical protein
LAC1533_RS01670	malate permease	GSS_RS01695	malate permease	Lacidipiscis_RS04825	hypothetical protein
LAC1533_RS01675	malate permease	GSS_RS01690	malate permease	Lacidipiscis_RS04830	hypothetical protein
LAC1533_RS01680	hypothetical protein	GSS_RS01685	hypothetical protein	Lacidipiscis_RS04835	hypothetical protein
LAC1533_RS01745	aldehyde dehydrogenase	GSS_RS12240	aldehyde dehydrogenase	Lacidipiscis_RS12635	aldehyde dehydrogenase
LAC1533_RS01750	MarR family transcriptional regulator	GSS_RS12235	MarR family transcriptional regulator	Lacidipiscis_RS12640	MarR family transcriptional regulator
LAC1533_RS01755	ABC transporter ATP-binding protein	GSS_RS01625	ABC transporter ATP-binding protein	Lacidipiscis_RS12645	ABC transporter ATP-binding protein
LAC1533_RS01760	ABC transporter ATP-binding protein	GSS_RS01620	ABC transporter ATP-binding protein	Lacidipiscis_RS12650	ABC transporter ATP-binding protein
LAC1533_RS01765	hypothetical protein	GSS_RS01615	hypothetical protein	Lacidipiscis_RS12655	hypothetical protein
LAC1533_RS01780	hypothetical protein	GSS_RS01605	MarR family transcriptional regulator	Lacidipiscis_RS00980	MarR family transcriptional regulator
LAC1533_RS01790	CsbD family protein	GSS_RS01595	CsbD family protein	Lacidipiscis_RS01005	CsbD family protein
LAC1533_RS01815	membrane protein	GSS_RS01575	membrane protein	Lacidipiscis_RS01030	membrane protein
LAC1533_RS01820	fructosamine kinase	GSS_RS01565	fructosamine-3-kinase	Lacidipiscis_RS01035	fructosamine kinase
LAC1533_RS01825	AI-2E family transporter	GSS_RS12220	AI-2E family transporter	Lacidipiscis_RS01040	AI-2E family transporter
LAC1533_RS01830	SDR family NAD(P)-dependent oxidoreductase	GSS_RS01555	SDR family NAD(P)-dependent oxidoreductase	Lacidipiscis_RS01045	SDR family NAD(P)-dependent oxidoreductase
LAC1533_RS01835	TrkA family potassium uptake protein	GSS_RS01550	TrkA family potassium uptake protein	Lacidipiscis_RS01050	TrkA family potassium uptake protein
LAC1533_RS01840	Trk family potassium uptake protein	GSS_RS01545	Trk family potassium uptake protein	Lacidipiscis_RS01055	ATP synthase subunit J
LAC1533_RS01845	DeoR/GlpR transcriptional regulator	GSS_RS01540	DeoR/GlpR transcriptional regulator	Lacidipiscis_RS01060	DeoR/GlpR transcriptional regulator
LAC1533_RS01850	DUF159 family protein	GSS_RS01535	DUF159 family protein	Lacidipiscis_RS01065	DUF159 family protein
LAC1533_RS01865	peptide-methionine (R)-S-oxide reductase	GSS_RS01525	peptide-methionine (R)-S-oxide reductase	Lacidipiscis_RS01075	peptide-methionine (R)-S-oxide reductase
LAC1533_RS01870	GntR family transcriptional regulator	GSS_RS01520	GntR family transcriptional regulator	Lacidipiscis_RS01080	GntR family transcriptional regulator
LAC1533_RS01875	ABC transporter ATP-binding protein	GSS_RS01515	ABC transporter ATP-binding protein	Lacidipiscis_RS01085	ABC transporter ATP-binding protein
LAC1533_RS01880	hypothetical protein	GSS_RS01510	hypothetical protein	Lacidipiscis_RS01090	hypothetical protein
LAC1533_RS01885	BMP family ABC transporter substrate-binding protein	GSS_RS01505	BMP family ABC transporter substrate-binding protein	Lacidipiscis_RS01095	BMP family ABC transporter substrate-binding protein
LAC1533_RS01890	ABC transporter ATP-binding protein	GSS_RS12215	ABC transporter ATP-binding protein	Lacidipiscis_RS01100	ABC transporter ATP-binding protein
LAC1533_RS01895	ABC transporter permease	GSS_RS12210	ABC transporter permease	Lacidipiscis_RS01105	ABC transporter permease
LAC1533_RS01900	ABC transporter permease	GSS_RS01490	ABC transporter permease	Lacidipiscis_RS01110	ABC transporter permease
LAC1533_RS01915	TPM domain-containing protein	GSS_RS01480	TPM domain-containing protein	Lacidipiscis_RS01120	TPM domain-containing protein
LAC1533_RS01920	demethylmenaquinone methyltransferase	GSS_RS01475	demethylmenaquinone methyltransferase	Lacidipiscis_RS01125	demethylmenaquinone methyltransferase
LAC1533_RS01925	antibiotic biosynthesis monooxygenase	GSS_RS01470	antibiotic biosynthesis monooxygenase	Lacidipiscis_RS01130	antibiotic biosynthesis monooxygenase
LAC1533_RS01930	hypothetical protein	GSS_RS01465	hypothetical protein	Lacidipiscis_RS01135	hypothetical protein
LAC1533_RS01935	CPBP family intramembrane metalloprotease	GSS_RS01460	CPBP family intramembrane metalloprotease	Lacidipiscis_RS01140	CPBP family intramembrane metalloprotease
LAC1533_RS01945	DUF4811 domain-containing protein	GSS_RS01450	DUF4811 domain-containing protein	Lacidipiscis_RS01150	DUF4811 domain-containing protein
LAC1533_RS01955	DNA polymerase III subunit alpha	GSS_RS08945	DNA polymerase III subunit alpha	Lacidipiscis_RS01155	DNA polymerase III subunit alpha
LAC1533_RS01960	LD-carboxypeptidase	GSS_RS08950	LD-carboxypeptidase	Lacidipiscis_RS01160	LD-carboxypeptidase
LAC1533_RS01970	D-aminopeptidase	GSS_RS08960	D-aminopeptidase	Lacidipiscis_RS06205	aminopeptidase
LAC1533_RS01975	glycerophosphoryl diester phosphodiesterase	GSS_RS08965	glycerophosphoryl diester phosphodiesterase	Lacidipiscis_RS06210	glycerophosphodiester phosphodiesterase
LAC1533_RS02015 IDENTICAL PARALOGS LAC1533_RS08415 IDENTICAL PARALOGS LAC1533_RS11370	hypothetical protein	GSS_RS05465	hypothetical protein	Lacidipiscis_RS02640	hypothetical protein
LAC1533_RS02020	L-lactate oxidase	GSS_RS08970	L-lactate oxidase	Lacidipiscis_RS03935	L-lactate oxidase
LAC1533_RS02025	formate-nitrite transporter	GSS_RS08975	formate/nitrite transporter	Lacidipiscis_RS03940	formate/nitrite transporter
LAC1533_RS02030	hypothetical protein	GSS_RS13065	permease domain-containing protein	Lacidipiscis_RS03945	hypothetical protein
LAC1533_RS02040	NAD(P)-dependent alcohol dehydrogenase	GSS_RS08995	NAD(P)-dependent alcohol dehydrogenase	Lacidipiscis_RS05830	NAD(P)-dependent alcohol dehydrogenase
LAC1533_RS02050	hypothetical protein	GSS_RS13805	hypothetical protein	Lacidipiscis_RS05825	hypothetical protein
LAC1533_RS02055	PRD domain-containing protein	GSS_RS13815	PRD domain-containing protein	Lacidipiscis_RS05820	PRD domain-containing protein
LAC1533_RS02060	PTS fructose IIA component	GSS_RS09005	PTS fructose IIA component	Lacidipiscis_RS04465	PTS fructose IIA subunit
LAC1533_RS02065	PTS mannose/fructose/sorbose transporter subunit IIB	GSS_RS09010	PTS mannose/fructose/sorbose transporter subunit IIB	Lacidipiscis_RS04470	PTS mannose/fructose/sorbose transporter subunit IIB
LAC1533_RS02070	PTS sugar transporter subunit IIC	GSS_RS09015	PTS sugar transporter subunit IIC	Lacidipiscis_RS04475	PTS sugar transporter subunit IIC
LAC1533_RS02080	alpha-glucosidase	GSS_RS09025	alpha-glucosidase	Lacidipiscis_RS04485	alpha-glucosidase
LAC1533_RS02110	hypothetical protein	GSS_RS09040	hypothetical protein	Lacidipiscis_RS04500	hypothetical protein
LAC1533_RS02115	hypothetical protein	GSS_RS09045	hypothetical protein	Lacidipiscis_RS04505	hypothetical protein
LAC1533_RS02120	Arc family DNA-binding protein	GSS_RS09050	Arc family DNA-binding protein	Lacidipiscis_RS04510	Arc family DNA-binding protein
LAC1533_RS02125	SPFH domain-containing protein	GSS_RS13085	SPFH domain-containing protein	Lacidipiscis_RS04515	SPFH domain-containing protein
LAC1533_RS02135	hypothetical protein	GSS_RS09070	hypothetical protein	Lacidipiscis_RS04525	hypothetical protein
LAC1533_RS02140	cation-translocating P-type ATPase	GSS_RS09075	cation-translocating P-type ATPase	Lacidipiscis_RS04530	cation-translocating P-type ATPase
LAC1533_RS02145	NADH peroxidase	GSS_RS09080	NADH peroxidase	Lacidipiscis_RS04535	NAD(FAD)-dependent dehydrogenase
LAC1533_RS02150	N-acetyltransferase	GSS_RS09085	N-acetyltransferase	Lacidipiscis_RS04540	N-acetyltransferase
LAC1533_RS02155	hypothetical protein	GSS_RS09090	hypothetical protein	Lacidipiscis_RS04545	hypothetical protein
LAC1533_RS02160	Na+/H+ antiporter NhaC	GSS_RS09095	Na+/H+ antiporter NhaC	Lacidipiscis_RS04550	Na+/H+ antiporter NhaC
LAC1533_RS02170	beta-phosphoglucomutase	GSS_RS09110	beta-phosphoglucomutase	Lacidipiscis_RS04560	beta-phosphoglucomutase
LAC1533_RS02175	LacI family transcriptional regulator	GSS_RS09115	LacI family transcriptional regulator	Lacidipiscis_RS04565	LacI family transcriptional regulator
LAC1533_RS02185	alpha-glucosidase	GSS_RS09120	alpha-glucosidase	Lacidipiscis_RS04570	alpha-glucosidase
LAC1533_RS02190	alpha-glycosidase	GSS_RS09125	alpha-glycosidase	Lacidipiscis_RS04575	alpha-glycosidase
LAC1533_RS02215	ABC transporter ATP-binding protein	GSS_RS09150	ABC transporter ATP-binding protein	Lacidipiscis_RS04600	ABC transporter ATP-binding protein
LAC1533_RS02225	DJ-1 family protein	GSS_RS09155	DJ-1 family protein	Lacidipiscis_RS04605	DJ-1 family protein
LAC1533_RS02230	hypothetical protein	GSS_RS09160	hypothetical protein	Lacidipiscis_RS04610	hypothetical protein
LAC1533_RS02245	DegV family protein	GSS_RS09165	DegV family protein	Lacidipiscis_RS11685	DegV family protein
LAC1533_RS02250	dipeptidase	GSS_RS09170	dipeptidase	Lacidipiscis_RS11680	dipeptidase
LAC1533_RS02255	NAD(P)H-hydrate epimerase	GSS_RS09175	NAD(P)H-hydrate epimerase	Lacidipiscis_RS04385	NAD(P)H-hydrate epimerase
LAC1533_RS02260	ArsR family transcriptional regulator	GSS_RS09180	ArsR family transcriptional regulator	Lacidipiscis_RS04390	ArsR family transcriptional regulator
LAC1533_RS02265	cation transporter	GSS_RS09185	cation transporter	Lacidipiscis_RS04395	cation transporter
LAC1533_RS02270	hypothetical protein	GSS_RS13820	short-chain dehydrogenase/reductase SDR	Lacidipiscis_RS04400	short-chain dehydrogenase/reductase SDR
LAC1533_RS02275	hypothetical protein	GSS_RS13105	hypothetical protein	Lacidipiscis_RS04180	hypothetical protein
LAC1533_RS02280	alpha/beta hydrolase	GSS_RS09200	alpha/beta hydrolase	Lacidipiscis_RS04185	alpha/beta hydrolase
LAC1533_RS02295	hypothetical protein	GSS_RS14175	hypothetical protein	Lacidipiscis_RS04200	hypothetical protein
LAC1533_RS02300	PTS glucose transporter subunit IIBC	GSS_RS13120	PTS glucose transporter subunit IIBC	Lacidipiscis_RS04205	PTS glucose transporter subunit IIBC
LAC1533_RS02305	hypothetical protein	GSS_RS09235	hypothetical protein	Lacidipiscis_RS04210	hypothetical protein
LAC1533_RS02315	MFS transporter	GSS_RS09245	MFS transporter	Lacidipiscis_RS04220	MFS transporter
LAC1533_RS02320	copper-translocating P-type ATPase	GSS_RS09250	copper-translocating P-type ATPase	Lacidipiscis_RS04225	copper-translocating P-type ATPase
LAC1533_RS02325	glutamate formiminotransferase	GSS_RS09255	glutamate formiminotransferase	Lacidipiscis_RS04230	glutamate formiminotransferase
LAC1533_RS02330	bifunctional 5,10-methylenetetrahydrofolate dehydrogenase/5,10-methenyltetrahydrofolate cyclohydrolase	GSS_RS09260	bifunctional 5,10-methylenetetrahydrofolate dehydrogenase/5,10-methenyltetrahydrofolate cyclohydrolase	Lacidipiscis_RS04235	bifunctional 5,10-methylenetetrahydrofolate dehydrogenase/5,10-methenyltetrahydrofolate cyclohydrolase
LAC1533_RS02335	zinc-binding alcohol dehydrogenase family protein	GSS_RS09265	zinc-binding alcohol dehydrogenase family protein	Lacidipiscis_RS04240	zinc-binding alcohol dehydrogenase family protein
LAC1533_RS02340	o-succinylbenzoate--CoA ligase	GSS_RS09270	o-succinylbenzoate--CoA ligase	Lacidipiscis_RS04245	o-succinylbenzoate--CoA ligase
LAC1533_RS02345	1,4-dihydroxy-2-naphthoyl-CoA synthase	GSS_RS09275	1,4-dihydroxy-2-naphthoyl-CoA synthase	Lacidipiscis_RS04250	1,4-dihydroxy-2-naphthoyl-CoA synthase
LAC1533_RS02350	PaaI family thioesterase	GSS_RS09280	PaaI family thioesterase	Lacidipiscis_RS04255	PaaI family thioesterase
LAC1533_RS02355	replication-associated recombination protein A	GSS_RS09290	replication-associated recombination protein A	Lacidipiscis_RS04260	replication-associated recombination protein A
LAC1533_RS02360	Hsp20/alpha crystallin family protein	GSS_RS09295	Hsp20/alpha crystallin family protein	Lacidipiscis_RS04265	Hsp20/alpha crystallin family protein
LAC1533_RS02365	AarF/ABC1/UbiB kinase family protein	GSS_RS09300	AarF/ABC1/UbiB kinase family protein	Lacidipiscis_RS04270	AarF/ABC1/UbiB kinase family protein
LAC1533_RS02370	peptide ABC transporter substrate-binding protein	GSS_RS09305	peptide ABC transporter substrate-binding protein	Lacidipiscis_RS04275	peptide ABC transporter substrate-binding protein
LAC1533_RS02385	carbonic anhydrase	GSS_RS09320	carbonic anhydrase	Lacidipiscis_RS04135	carbonic anhydrase
LAC1533_RS02390	sigma-54-dependent transcriptional regulator	GSS_RS09325	sigma-54-dependent transcriptional regulator	Lacidipiscis_RS04140	sigma-54-dependent transcriptional regulator
LAC1533_RS02395	PTS fructose transporter subunit IIB	GSS_RS09330	PTS fructose transporter subunit IIB	Lacidipiscis_RS04145	PTS fructose transporter subunit IIB
LAC1533_RS02400	PTS mannose transporter subunit IIAB	GSS_RS09335	PTS mannose transporter subunit IIAB	Lacidipiscis_RS04150	PTS mannose transporter subunit IIAB
LAC1533_RS02405	PTS mannose/fructose/sorbose transporter subunit IIC	GSS_RS09340	PTS mannose/fructose/sorbose transporter subunit IIC	Lacidipiscis_RS04155	PTS mannose/fructose/sorbose transporter subunit IIC
LAC1533_RS02410	PTS mannose family transporter subunit IID	GSS_RS09345	PTS mannose transporter subunit IID	Lacidipiscis_RS04160	PTS mannose transporter subunit IID
LAC1533_RS02415	DUF956 domain-containing protein	GSS_RS09350	DUF956 domain-containing protein	Lacidipiscis_RS04165	DUF956 domain-containing protein
LAC1533_RS02440	neopullulanase/cyclomaltodextrinase/maltogenic alpha-amylase	GSS_RS05675	Neopullulanase/cyclomaltodextrinase/maltogenic alpha-amylase	Lacidipiscis_RS07000	neopullulanase/cyclomaltodextrinase/maltogenic alpha-amylase
LAC1533_RS02455	LysM peptidoglycan-binding domain-containing protein	GSS_RS05680	LysM peptidoglycan-binding domain-containing protein	Lacidipiscis_RS00140	LysM peptidoglycan-binding domain-containing protein
LAC1533_RS02465	uracil-DNA glycosylase	GSS_RS05685	uracil-DNA glycosylase	Lacidipiscis_RS03845	uracil-DNA glycosylase
LAC1533_RS02475	folate family ECF transporter S component	GSS_RS05695	folate family ECF transporter S component	Lacidipiscis_RS03835	folate family ECF transporter S component
LAC1533_RS02480	metal ABC transporter permease	GSS_RS05700	metal ABC transporter permease	Lacidipiscis_RS03830	metal ABC transporter permease
LAC1533_RS02485	ABC transporter ATP-binding protein	GSS_RS05705	ABC transporter ATP-binding protein	Lacidipiscis_RS03825	ABC transporter ATP-binding protein
LAC1533_RS02490	QueT transporter family protein	GSS_RS05710	QueT transporter family protein	Lacidipiscis_RS03820	QueT transporter family protein
LAC1533_RS02495	DUF2829 domain-containing protein	GSS_RS05715	DUF2829 domain-containing protein	Lacidipiscis_RS03815	DUF2829 domain-containing protein
LAC1533_RS02500	3-oxoacyl-ACP reductase	GSS_RS05720	3-oxoacyl-ACP reductase	Lacidipiscis_RS03810	3-oxoacyl-ACP reductase
LAC1533_RS02505	HD domain-containing protein	GSS_RS05725	HD domain-containing protein	Lacidipiscis_RS03805	HD domain-containing protein
LAC1533_RS02510	lipase/esterase	GSS_RS05730	lipase/esterase	Lacidipiscis_RS03800	lipase
LAC1533_RS02515	16S rRNA (guanine(527)-N(7))-methyltransferase RsmG	GSS_RS05735	16S rRNA (guanine(527)-N(7))-methyltransferase RsmG	Lacidipiscis_RS03795	16S rRNA (guanine(527)-N(7))-methyltransferase RsmG
LAC1533_RS02520	nucleoid occlusion protein	GSS_RS05740	nucleoid occlusion protein	Lacidipiscis_RS03790	nucleoid occlusion protein
LAC1533_RS02525	ParA family protein	GSS_RS05745	ParA family protein	Lacidipiscis_RS03785	ParA family protein
LAC1533_RS02530	chromosome partitioning protein ParB	GSS_RS05750	chromosome partitioning protein ParB	Lacidipiscis_RS03780	chromosome partitioning protein ParB
LAC1533_RS02535	DUF951 domain-containing protein	GSS_RS14060	DUF951 domain-containing protein	Lacidipiscis_RS03775	DUF951 domain-containing protein
LAC1533_RS02540	redox-regulated ATPase YchF	GSS_RS05760	redox-regulated ATPase YchF	Lacidipiscis_RS03770	redox-regulated ATPase YchF
LAC1533_RS02545	DUF1129 domain-containing protein	GSS_RS05765	DUF1129 domain-containing protein	Lacidipiscis_RS03765	DUF1129 domain-containing protein
LAC1533_RS02550	Cof-type HAD-IIB family hydrolase	GSS_RS05770	Cof-type HAD-IIB family hydrolase	Lacidipiscis_RS03760	Cof-type HAD-IIB family hydrolase
LAC1533_RS02560	excinuclease ABC subunit UvrA	GSS_RS05780	excinuclease ABC subunit UvrA	Lacidipiscis_RS03750	excinuclease ABC subunit UvrA
LAC1533_RS02570	histidine phosphatase family protein	GSS_RS05795	histidine phosphatase family protein	Lacidipiscis_RS03740	histidine phosphatase family protein
LAC1533_RS02575	histidine phosphatase family protein	GSS_RS05800	histidine phosphatase family protein	Lacidipiscis_RS03735	histidine phosphatase family protein
LAC1533_RS02580	MFS transporter	GSS_RS05805	MFS transporter	Lacidipiscis_RS03730	MFS transporter
LAC1533_RS02585	glutamate 5-kinase	GSS_RS12675	glutamate 5-kinase	Lacidipiscis_RS03725	glutamate 5-kinase
LAC1533_RS02590	glutamate-5-semialdehyde dehydrogenase	GSS_RS05815	glutamate-5-semialdehyde dehydrogenase	Lacidipiscis_RS03720	glutamate-5-semialdehyde dehydrogenase
LAC1533_RS02600	aldo/keto reductase	GSS_RS05825	aldo/keto reductase	Lacidipiscis_RS01675	aldo/keto reductase
LAC1533_RS02605	endonuclease III	GSS_RS05830	hypothetical protein	Lacidipiscis_RS01670	endonuclease III
LAC1533_RS02610	ribose-phosphate pyrophosphokinase	GSS_RS05835	ribose-phosphate pyrophosphokinase	Lacidipiscis_RS01665	ribose-phosphate pyrophosphokinase
LAC1533_RS02615	aminopeptidase	GSS_RS05840	aminopeptidase	Lacidipiscis_RS01660	aminopeptidase
LAC1533_RS02630	adenosine deaminase	GSS_RS05845	adenosine deaminase	Lacidipiscis_RS01655	adenosine deaminase
LAC1533_RS02635	hypothetical protein	GSS_RS05850	hypothetical protein	Lacidipiscis_RS01650	hypothetical protein
LAC1533_RS02640	cation-translocating P-type ATPase	GSS_RS05855	cation-translocating P-type ATPase	Lacidipiscis_RS01645	cation-translocating P-type ATPase
LAC1533_RS02645	ABC transporter ATP-binding protein	GSS_RS05865	ABC transporter ATP-binding protein	Lacidipiscis_RS01640	ABC transporter ATP-binding protein
LAC1533_RS02660	class I SAM-dependent methyltransferase	GSS_RS05885	class I SAM-dependent methyltransferase	Lacidipiscis_RS01625	class I SAM-dependent methyltransferase
LAC1533_RS02665	hypothetical protein	GSS_RS05890	hypothetical protein	Lacidipiscis_RS01620	hypothetical protein
LAC1533_RS02670	MurR/RpiR family transcriptional regulator	GSS_RS05895	MurR/RpiR family transcriptional regulator	Lacidipiscis_RS01615	MurR/RpiR family transcriptional regulator
LAC1533_RS02675	N-acetylmuramic acid 6-phosphate etherase	GSS_RS05900	N-acetylmuramic acid 6-phosphate etherase	Lacidipiscis_RS01610	N-acetylmuramic acid 6-phosphate etherase
LAC1533_RS02680	PTS beta-glucoside transporter subunit EIIBCA	GSS_RS05905	PTS beta-glucoside transporter subunit EIIBCA	Lacidipiscis_RS01605	PTS glucose transporter
LAC1533_RS02685	methionine ABC transporter ATP-binding protein	GSS_RS05910	methionine ABC transporter ATP-binding protein	Lacidipiscis_RS01600	methionine ABC transporter ATP-binding protein
LAC1533_RS02690	ABC transporter permease	GSS_RS05915	ABC transporter permease	Lacidipiscis_RS01595	ABC transporter permease
LAC1533_RS02700	HlyC/CorC family transporter	GSS_RS05930	HlyC/CorC family transporter	Lacidipiscis_RS01585	HlyC/CorC family transporter
LAC1533_RS02705	protein-tyrosine-phosphatase	GSS_RS05935	protein-tyrosine-phosphatase	Lacidipiscis_RS01580	protein-tyrosine-phosphatase
LAC1533_RS02710	methylated-DNA--[protein]-cysteine S-methyltransferase	GSS_RS05940	methylated-DNA--[protein]-cysteine S-methyltransferase	Lacidipiscis_RS01575	methylated-DNA--[protein]-cysteine S-methyltransferase
LAC1533_RS02715	undecaprenyl-diphosphate phosphatase	GSS_RS05945	undecaprenyl-diphosphate phosphatase	Lacidipiscis_RS01570	undecaprenyl-diphosphate phosphatase
LAC1533_RS02720	phosphopyruvate hydratase	GSS_RS05950	phosphopyruvate hydratase	Lacidipiscis_RS01565	phosphopyruvate hydratase
LAC1533_RS02730	alpha-galactosidase	GSS_RS05955	alpha-galactosidase	Lacidipiscis_RS10520	alpha-galactosidase
LAC1533_RS02735	hypothetical protein	GSS_RS05960	hypothetical protein	Lacidipiscis_RS10515	hypothetical protein
LAC1533_RS02740	hypothetical protein	GSS_RS05965	hypothetical protein	Lacidipiscis_RS10510	hypothetical protein
LAC1533_RS02745	threonine/serine exporter	GSS_RS05970	threonine/serine exporter	Lacidipiscis_RS10505	threonine/serine exporter
LAC1533_RS02750	threonine/serine exporter	GSS_RS05975	threonine/serine exporter	Lacidipiscis_RS10500	threonine/serine exporter
LAC1533_RS02760	glutamyl-tRNA amidotransferase subunit A	GSS_RS05985	glutamyl-tRNA amidotransferase subunit A	Lacidipiscis_RS10490	glutamyl-tRNA amidotransferase
LAC1533_RS02765	nucleoside-diphosphate kinase	GSS_RS05990	nucleoside-diphosphate kinase	Lacidipiscis_RS10485	nucleoside-diphosphate kinase
LAC1533_RS02775	(deoxy)nucleoside triphosphate pyrophosphohydrolase	GSS_RS05995	(deoxy)nucleoside triphosphate pyrophosphohydrolase	Lacidipiscis_RS10480	(deoxy)nucleoside triphosphate pyrophosphohydrolase
LAC1533_RS02780	DUF3427 domain-containing protein	GSS_RS06000	DUF3427 domain-containing protein	Lacidipiscis_RS10475	DUF3427 domain-containing protein
LAC1533_RS02785	IMP dehydrogenase	GSS_RS06005	IMP dehydrogenase	Lacidipiscis_RS10470	IMP dehydrogenase
LAC1533_RS02790	large-conductance mechanosensitive channel protein MscL	GSS_RS06010	large-conductance mechanosensitive channel protein MscL	Lacidipiscis_RS10465	large-conductance mechanosensitive channel protein MscL
LAC1533_RS02800	nitroreductase	GSS_RS06015	nitroreductase	Lacidipiscis_RS10460	nitroreductase
LAC1533_RS02805	LysM domain-containing protein	GSS_RS06020	LysM domain-containing protein	Lacidipiscis_RS10455	LysM domain-containing protein
LAC1533_RS02810	glyoxalase	GSS_RS06025	glyoxalase	Lacidipiscis_RS10450	glyoxalase
LAC1533_RS02815	hypothetical protein	GSS_RS06030	hypothetical protein	Lacidipiscis_RS10445	hypothetical protein
LAC1533_RS02820	UDP-glucose 4-epimerase GalE	GSS_RS06035	UDP-glucose 4-epimerase GalE	Lacidipiscis_RS10440	UDP-glucose 4-epimerase GalE
LAC1533_RS02825	hypothetical protein	GSS_RS06040	hypothetical protein	Lacidipiscis_RS10435	hypothetical protein
LAC1533_RS02830	hypothetical protein	GSS_RS06045	hypothetical protein	Lacidipiscis_RS10430	hypothetical protein
LAC1533_RS02835	galactose mutarotase	GSS_RS06050	galactose mutarotase	Lacidipiscis_RS10425	galactose mutarotase
LAC1533_RS02840	HAD family hydrolase	GSS_RS06055	HAD family hydrolase	Lacidipiscis_RS03205	HAD family hydrolase
LAC1533_RS02845	AI-2E family transporter	GSS_RS06060	AI-2E family transporter	Lacidipiscis_RS03200	AI-2E family transporter
LAC1533_RS02850	pyridoxal phosphate-dependent aminotransferase	GSS_RS06065	pyridoxal phosphate-dependent aminotransferase	Lacidipiscis_RS03195	pyridoxal phosphate-dependent aminotransferase
LAC1533_RS02855	2,3-diphosphoglycerate-dependent phosphoglycerate mutase	GSS_RS06070	2,3-diphosphoglycerate-dependent phosphoglycerate mutase	Lacidipiscis_RS03190	2,3-diphosphoglycerate-dependent phosphoglycerate mutase
LAC1533_RS02870	hypothetical protein	GSS_RS12705	hypothetical protein	Lacidipiscis_RS05340	hypothetical protein
LAC1533_RS02885	DNA starvation/stationary phase protection protein	GSS_RS06205	DNA starvation/stationary phase protection protein	Lacidipiscis_RS05355	DNA starvation/stationary phase protection protein
LAC1533_RS02900	Crp/Fnr family transcriptional regulator	GSS_RS06220	Crp/Fnr family transcriptional regulator	Lacidipiscis_RS05370	Crp/Fnr family transcriptional regulator
LAC1533_RS02905	copper chaperone	GSS_RS06225	copper chaperone	Lacidipiscis_RS05375	copper chaperone
LAC1533_RS02910	DNA starvation/stationary phase protection protein	GSS_RS06230	DNA starvation/stationary phase protection protein	Lacidipiscis_RS05380	DNA starvation/stationary phase protection protein
LAC1533_RS02915	metal-sensitive transcriptional regulator	GSS_RS06240	metal-sensitive transcriptional regulator	Lacidipiscis_RS05385	metal-sensitive transcriptional regulator
LAC1533_RS02920	thioredoxin	GSS_RS06245	thioredoxin	Lacidipiscis_RS05390	thioredoxin
LAC1533_RS02925	aquaporin family protein	GSS_RS06250	aquaporin family protein	Lacidipiscis_RS05395	aquaporin family protein
LAC1533_RS02940	hypothetical protein	GSS_RS14075	hypothetical protein	Lacidipiscis_RS05405	hypothetical protein
LAC1533_RS02945	hypothetical protein	GSS_RS06265	hypothetical protein	Lacidipiscis_RS05410	hypothetical protein
LAC1533_RS02955	MarR family transcriptional regulator	GSS_RS06280	MarR family transcriptional regulator	Lacidipiscis_RS05415	MarR family transcriptional regulator
LAC1533_RS02985	tRNA-dihydrouridine synthase	GSS_RS06305	tRNA-dihydrouridine synthase	Lacidipiscis_RS05435	tRNA-dihydrouridine synthase
LAC1533_RS02990	hypothetical protein	GSS_RS06310	hypothetical protein	Lacidipiscis_RS05440	hypothetical protein
LAC1533_RS02995	succinyl-diaminopimelate desuccinylase	GSS_RS06315	succinyl-diaminopimelate desuccinylase	Lacidipiscis_RS05445	succinyl-diaminopimelate desuccinylase
LAC1533_RS03000	DUF554 domain-containing protein	GSS_RS06320	DUF554 domain-containing protein	Lacidipiscis_RS05450	DUF554 domain-containing protein
LAC1533_RS03005	flavodoxin family protein	GSS_RS06325	flavodoxin family protein	Lacidipiscis_RS05455	flavodoxin family protein
LAC1533_RS03010	DUF4767 domain-containing protein	GSS_RS12740	DUF4767 domain-containing protein	Lacidipiscis_RS05460	DUF4767 domain-containing protein
LAC1533_RS03015	hypothetical protein	GSS_RS06335	hypothetical protein	Lacidipiscis_RS05465	hypothetical protein
LAC1533_RS03020	hypothetical protein	GSS_RS06340	hypothetical protein	Lacidipiscis_RS05470	hypothetical protein
LAC1533_RS03025	RluA family pseudouridine synthase	GSS_RS06350	RluA family pseudouridine synthase	Lacidipiscis_RS05475	RluA family pseudouridine synthase
LAC1533_RS03030	DUF3114 domain-containing protein	GSS_RS12745	DUF3114 domain-containing protein	Lacidipiscis_RS05480	DUF3114 domain-containing protein
LAC1533_RS03035	hypothetical protein	GSS_RS06360	hypothetical protein	Lacidipiscis_RS05485	hypothetical protein
LAC1533_RS03040	OsmC family peroxiredoxin	GSS_RS06365	OsmC family peroxiredoxin	Lacidipiscis_RS05490	OsmC family peroxiredoxin
LAC1533_RS03045	YitT family protein	GSS_RS06370	YitT family protein	Lacidipiscis_RS05495	YitT family protein
LAC1533_RS03050	phosphoketolase family protein	GSS_RS06375	phosphoketolase family protein	Lacidipiscis_RS05500	phosphoketolase family protein
LAC1533_RS03055	hypothetical protein	GSS_RS06380	hypothetical protein	Lacidipiscis_RS05505	hypothetical protein
LAC1533_RS03060	NERD domain-containing protein	GSS_RS06390	NERD domain-containing protein	Lacidipiscis_RS05510	NERD domain-containing protein
LAC1533_RS03065	RNA methylase	GSS_RS06395	RNA methylase	Lacidipiscis_RS05515	RNA methylase
LAC1533_RS03070	YfcC family protein	GSS_RS06400	YfcC family protein	Lacidipiscis_RS05520	YfcC family protein
LAC1533_RS03075	acetylornithine deacetylase	GSS_RS06405	acetylornithine deacetylase	Lacidipiscis_RS05525	acetylornithine deacetylase
LAC1533_RS03080	LemA family protein	GSS_RS06415	LemA family protein	Lacidipiscis_RS05530	LemA family protein
LAC1533_RS03085	heat-shock protein HtpX	GSS_RS06420	heat-shock protein HtpX	Lacidipiscis_RS05535	heat-shock protein HtpX
LAC1533_RS03105	DUF871 domain-containing protein	GSS_RS09780	DUF871 domain-containing protein	Lacidipiscis_RS00850	DUF871 domain-containing protein
LAC1533_RS03110	deoxyribonuclease	GSS_RS09785	deoxyribonuclease	Lacidipiscis_RS00845	deoxyribonuclease
LAC1533_RS03120	TetR/AcrR family transcriptional regulator	GSS_RS13830	TetR/AcrR family transcriptional regulator	Lacidipiscis_RS00840	TetR/AcrR family transcriptional regulator
LAC1533_RS03130	ABC transporter ATP-binding protein	GSS_RS09805	ABC transporter ATP-binding protein	Lacidipiscis_RS00830	ABC transporter ATP-binding protein
LAC1533_RS03135	hypothetical protein	GSS_RS13835	hypothetical protein	Lacidipiscis_RS00825	hypothetical protein
LAC1533_RS03140	glycosyltransferase family 8 protein	GSS_RS09825	glycosyltransferase family 8 protein	Lacidipiscis_RS09505	glycosyltransferase family 8 protein
LAC1533_RS03145	deoxyribose-phosphate aldolase	GSS_RS13210	deoxyribose-phosphate aldolase	Lacidipiscis_RS09500	deoxyribose-phosphate aldolase
LAC1533_RS03160	IS982 family transposase	GSS_RS11505	transposase	Lacidipiscis_RS05855	IS982 family transposase
LAC1533_RS03195	hypothetical protein	GSS_RS09855	hypothetical protein	Lacidipiscis_RS00010	hypothetical protein
LAC1533_RS03200	NADH-dependent alcohol dehydrogenase	GSS_RS09865	NADH-dependent alcohol dehydrogenase	Lacidipiscis_RS00005	NADH-dependent alcohol dehydrogenase
LAC1533_RS03205	HAD family phosphatase	GSS_RS09870	HAD family phosphatase	Lacidipiscis_RS11990	HAD family phosphatase
LAC1533_RS03220	energy-coupling factor transporter transmembrane protein EcfT	GSS_RS09885	energy-coupling factor transporter transmembrane protein EcfT	Lacidipiscis_RS11975	energy-coupling factor transporter transmembrane protein EcfT
LAC1533_RS03225	LysM peptidoglycan-binding domain-containing protein	GSS_RS09890	LysM domain-containing protein	Lacidipiscis_RS11970	LysM peptidoglycan-binding domain-containing protein
LAC1533_RS03230	tRNA epoxyqueuosine(34) reductase QueG	GSS_RS09895	tRNA epoxyqueuosine(34) reductase QueG	Lacidipiscis_RS13315	tRNA epoxyqueuosine(34) reductase QueG
LAC1533_RS03235	DUF4430 domain-containing protein	GSS_RS09900	DUF4430 domain-containing protein	Lacidipiscis_RS13310	DUF4430 domain-containing protein
LAC1533_RS03240	deoxynucleoside kinase	GSS_RS09905	deoxyadenosine kinase	Lacidipiscis_RS13305	deoxyadenosine kinase
LAC1533_RS03245	DUF1440 domain-containing protein	GSS_RS09910	DUF1440 domain-containing protein	Lacidipiscis_RS13300	DUF1440 domain-containing protein
LAC1533_RS03250	MFS transporter	GSS_RS09915	sodium:solute symporter	Lacidipiscis_RS13295	sodium:solute symporter
LAC1533_RS03255	linear amide C-N hydrolase	GSS_RS09920	linear amide C-N hydrolase	Lacidipiscis_RS13290	linear amide C-N hydrolase
LAC1533_RS03295	cytochrome ubiquinol oxidase subunit I	GSS_RS09935	cytochrome ubiquinol oxidase subunit I	Lacidipiscis_RS04955	cytochrome ubiquinol oxidase subunit I
LAC1533_RS03300	cytochrome d ubiquinol oxidase subunit II	GSS_RS09940	cytochrome d ubiquinol oxidase subunit II	Lacidipiscis_RS04950	cytochrome d ubiquinol oxidase subunit II
LAC1533_RS03305	thiol reductant ABC exporter subunit CydD	GSS_RS09945	thiol reductant ABC exporter subunit CydD	Lacidipiscis_RS04945	thiol reductant ABC exporter subunit CydD
LAC1533_RS03310	thiol reductant ABC exporter subunit CydC	GSS_RS09950	thiol reductant ABC exporter subunit CydC	Lacidipiscis_RS04940	thiol reductant ABC exporter subunit CydC
LAC1533_RS03325	prenyltransferase	GSS_RS09960	1,4-dihydroxy-2-naphthoate polyprenyltransferase	Lacidipiscis_RS04930	1,4-dihydroxy-2-naphthoate polyprenyltransferase
LAC1533_RS03330	NAD(P)/FAD-dependent oxidoreductase	GSS_RS09965	NAD(P)/FAD-dependent oxidoreductase	Lacidipiscis_RS04925	NAD(P)/FAD-dependent oxidoreductase
LAC1533_RS03335	D-2-hydroxyacid dehydrogenase	GSS_RS09970	D-2-hydroxyacid dehydrogenase	Lacidipiscis_RS04920	hydroxyacid dehydrogenase
LAC1533_RS03340	metal-dependent hydrolase	GSS_RS09975	metal-dependent hydrolase	Lacidipiscis_RS04915	metal-dependent hydrolase
LAC1533_RS03350	hypothetical protein	GSS_RS09985	hypothetical protein	Lacidipiscis_RS04905	hypothetical protein
LAC1533_RS03355	peroxidase	GSS_RS09990	peroxidase	Lacidipiscis_RS04900	peroxidase
LAC1533_RS03360	iron-sulfur cluster biosynthesis family protein	GSS_RS09995	iron-sulfur cluster biosynthesis family protein	Lacidipiscis_RS04895	iron-sulfur cluster biosynthesis family protein
LAC1533_RS03365	PLP-dependent aminotransferase family protein	GSS_RS10000	PLP-dependent aminotransferase family protein	Lacidipiscis_RS04890	PLP-dependent aminotransferase family protein
LAC1533_RS03380	CBS domain-containing protein	GSS_RS10005	CBS domain-containing protein	Lacidipiscis_RS04870	CBS domain-containing protein
LAC1533_RS03385	ABC transporter permease	GSS_RS10010	ABC transporter permease	Lacidipiscis_RS04865	ABC transporter permease
LAC1533_RS03390	osmoprotectant ABC transporter substrate-binding protein	GSS_RS10015	osmoprotectant ABC transporter substrate-binding protein	Lacidipiscis_RS04860	osmoprotectant ABC transporter substrate-binding protein
LAC1533_RS03395	ABC transporter permease	GSS_RS10020	ABC transporter permease	Lacidipiscis_RS04855	ABC transporter permease
LAC1533_RS03400	glycosyltransferase family 8 protein	GSS_RS10025	glycosyltransferase family 8 protein	Lacidipiscis_RS04850	glycosyltransferase family 8 protein
LAC1533_RS03405	hypothetical protein	GSS_RS10030	hypothetical protein	Lacidipiscis_RS04845	SAM-dependent methyltransferase
LAC1533_RS03415	DNA-binding response regulator	GSS_RS10585	DNA-binding response regulator	Lacidipiscis_RS01890	DNA-binding response regulator
LAC1533_RS03420	sensor histidine kinase	GSS_RS10590	sensor histidine kinase	Lacidipiscis_RS01895	sensor histidine kinase
LAC1533_RS03425	D-alanyl-D-alanine carboxypeptidase	GSS_RS10595	D-alanyl-D-alanine carboxypeptidase	Lacidipiscis_RS01900	D-alanyl-D-alanine carboxypeptidase
LAC1533_RS03430	branched-chain amino acid ABC transporter permease	GSS_RS10600	branched-chain amino acid ABC transporter permease	Lacidipiscis_RS01905	branched-chain amino acid ABC transporter permease
LAC1533_RS03435	AzlD domain-containing protein	GSS_RS10605	AzlD domain-containing protein	Lacidipiscis_RS01910	AzlD domain-containing protein
LAC1533_RS03440	alpha/beta hydrolase	GSS_RS10610	alpha/beta hydrolase	Lacidipiscis_RS06445	alpha/beta hydrolase
LAC1533_RS03450	hypothetical protein	GSS_RS10620	hypothetical protein	Lacidipiscis_RS09190	hypothetical protein
LAC1533_RS03455	RluA family pseudouridine synthase	GSS_RS10625	RluA family pseudouridine synthase	Lacidipiscis_RS09195	RluA family pseudouridine synthase
LAC1533_RS03460	metal-dependent transcriptional regulator	GSS_RS10630	metal-dependent transcriptional regulator	Lacidipiscis_RS09200	metal-dependent transcriptional regulator
LAC1533_RS03465	cold-shock protein	GSS_RS10635	cold-shock protein	Lacidipiscis_RS09205	cold-shock protein
LAC1533_RS03475	LytR family transcriptional regulator	GSS_RS10640	LytR family transcriptional regulator	Lacidipiscis_RS09210	LytR family transcriptional regulator
LAC1533_RS03485	DUF805 domain-containing protein	GSS_RS10650	DUF805 domain-containing protein	Lacidipiscis_RS09215	DUF805 domain-containing protein
LAC1533_RS03490	N-acetyltransferase	GSS_RS13320	N-acetyltransferase	Lacidipiscis_RS09220	N-acetyltransferase
LAC1533_RS03495	Rrf2 family transcriptional regulator	GSS_RS10660	Rrf2 family transcriptional regulator	Lacidipiscis_RS09225	Rrf2 family transcriptional regulator
LAC1533_RS03500	acetolactate synthase AlsS	GSS_RS10665	acetolactate synthase AlsS	Lacidipiscis_RS09230	acetolactate synthase AlsS
LAC1533_RS03505	acetolactate decarboxylase	GSS_RS10670	acetolactate decarboxylase	Lacidipiscis_RS09235	acetolactate decarboxylase
LAC1533_RS03510	amino acid permease	GSS_RS10675	amino acid permease	Lacidipiscis_RS09240	amino acid permease
LAC1533_RS03515	serine--tRNA ligase	GSS_RS10680	serine--tRNA ligase	Lacidipiscis_RS09245	serine--tRNA ligase
LAC1533_RS03545	sigma-70 family RNA polymerase sigma factor	GSS_RS04840	sigma-70 family RNA polymerase sigma factor	Lacidipiscis_RS05315	sigma-70 family RNA polymerase sigma factor
LAC1533_RS03560	ATP-dependent DNA helicase	GSS_RS04850	ATP-dependent DNA helicase	Lacidipiscis_RS06410	ATP-dependent DNA helicase
LAC1533_RS03565	tryptophan--tRNA ligase	GSS_RS04855	tryptophan--tRNA ligase	Lacidipiscis_RS06405	tryptophan--tRNA ligase
LAC1533_RS03570	Ppx/GppA family phosphatase	GSS_RS04860	Ppx/GppA family phosphatase	Lacidipiscis_RS06400	exopolyphosphatase
LAC1533_RS03580	hypothetical protein	GSS_RS10285	hypothetical protein	Lacidipiscis_RS06395	hypothetical protein
LAC1533_RS03585	hydroxymethylglutaryl-CoA reductase, degradative	GSS_RS10290	hydroxymethylglutaryl-CoA reductase, degradative	Lacidipiscis_RS06390	hydroxymethylglutaryl-CoA reductase, degradative
LAC1533_RS03590	hypothetical protein	GSS_RS10295	hypothetical protein	Lacidipiscis_RS06385	hypothetical protein
LAC1533_RS03595	NAD-dependent protein deacylase	GSS_RS10300	NAD-dependent protein deacylase	Lacidipiscis_RS06380	NAD-dependent protein deacylase
LAC1533_RS03600	methionine--tRNA ligase	GSS_RS10305	methionine--tRNA ligase	Lacidipiscis_RS06375	methionine--tRNA ligase
LAC1533_RS03605	TatD family deoxyribonuclease	GSS_RS10310	TatD family deoxyribonuclease	Lacidipiscis_RS06370	TatD family deoxyribonuclease
LAC1533_RS03610	ribonuclease M5	GSS_RS10315	ribonuclease M5	Lacidipiscis_RS06365	ribonuclease M5
LAC1533_RS03620	hypothetical protein	GSS_RS10325	hypothetical protein	Lacidipiscis_RS06355	hypothetical protein
LAC1533_RS03630	pur operon repressor	GSS_RS10335	pur operon repressor	Lacidipiscis_RS06345	pur operon repressor
LAC1533_RS03635	XRE family transcriptional regulator	GSS_RS10340	XRE family transcriptional regulator	Lacidipiscis_RS06340	XRE family transcriptional regulator
LAC1533_RS03640	bifunctional UDP-N-acetylglucosamine diphosphorylase/glucosamine-1-phosphate N-acetyltransferase GlmU	GSS_RS10345	bifunctional UDP-N-acetylglucosamine diphosphorylase/glucosamine-1-phosphate N-acetyltransferase GlmU	Lacidipiscis_RS08340	bifunctional UDP-N-acetylglucosamine diphosphorylase/glucosamine-1-phosphate N-acetyltransferase GlmU
LAC1533_RS03645	ribose-phosphate pyrophosphokinase	GSS_RS10350	ribose-phosphate pyrophosphokinase	Lacidipiscis_RS08335	ribose-phosphate pyrophosphokinase
LAC1533_RS03650	hypothetical protein	GSS_RS10355	hypothetical protein	Lacidipiscis_RS08330	hypothetical protein
LAC1533_RS03655	biotin--[acetyl-CoA-carboxylase] ligase	GSS_RS10360	biotin--[acetyl-CoA-carboxylase] ligase	Lacidipiscis_RS08325	biotin--[acetyl-CoA-carboxylase] ligase
LAC1533_RS03665	YibE/F family protein	GSS_RS10370	YibE/F family protein	Lacidipiscis_RS09440	YibE/F family protein
LAC1533_RS03670	hypothetical protein	GSS_RS13295	hypothetical protein	Lacidipiscis_RS09435	hypothetical protein
LAC1533_RS03675	HD domain-containing protein	GSS_RS10385	HD domain-containing protein	Lacidipiscis_RS11385	HD domain-containing protein
LAC1533_RS03680	DUF1934 domain-containing protein	GSS_RS10395	DUF1934 domain-containing protein	Lacidipiscis_RS11380	DUF1934 domain-containing protein
LAC1533_RS03685	DNA-directed RNA polymerase subunit delta	GSS_RS10400	DNA-directed RNA polymerase subunit delta	Lacidipiscis_RS11375	DNA-directed RNA polymerase subunit delta
LAC1533_RS03690	CTP synthase	GSS_RS10405	CTP synthase	Lacidipiscis_RS11370	CTP synthase
LAC1533_RS03710	hypothetical protein	GSS_RS10830	hypothetical protein	Lacidipiscis_RS11365	hypothetical protein
LAC1533_RS03720	transcription termination factor Rho	GSS_RS10840	transcription termination factor Rho	Lacidipiscis_RS11355	transcription termination factor Rho
LAC1533_RS03725	type B 50S ribosomal protein L31	GSS_RS10845	type B 50S ribosomal protein L31	Lacidipiscis_RS11350	type B 50S ribosomal protein L31
LAC1533_RS03730	hypothetical protein	GSS_RS10850	hypothetical protein	Lacidipiscis_RS13320	hypothetical protein
LAC1533_RS03735	ATP-dependent DNA helicase	GSS_RS10855	ATP-dependent DNA helicase	Lacidipiscis_RS09425	hypothetical protein
LAC1533_RS03740	NCS2 family permease	GSS_RS10860	NCS2 family permease	Lacidipiscis_RS09420	NCS2 family permease
LAC1533_RS03745	dihydrofolate reductase	GSS_RS10865	dihydrofolate reductase	Lacidipiscis_RS09415	dihydrofolate reductase
LAC1533_RS03750	TIGR02452 family protein	GSS_RS10870	TIGR02452 family protein	Lacidipiscis_RS09410	TIGR02452 family protein
LAC1533_RS03755	N-acetyltransferase	GSS_RS10880	N-acetyltransferase	Lacidipiscis_RS09405	N-acetyltransferase
LAC1533_RS03760	UDP-N-acetylmuramoyl-tripeptide--D-alanyl-D- alanine ligase	GSS_RS10885	UDP-N-acetylmuramoyl-tripeptide--D-alanyl-D- alanine ligase	Lacidipiscis_RS09400	UDP-N-acetylmuramoyl-tripeptide--D-alanyl-D- alanine ligase
LAC1533_RS03765	ATP-dependent helicase	GSS_RS10890	ATP-dependent helicase	Lacidipiscis_RS09395	ATP-dependent helicase
LAC1533_RS03795	holo-ACP synthase	GSS_RS10770	holo-ACP synthase	Lacidipiscis_RS03865	holo-ACP synthase
LAC1533_RS03800	alanine racemase	GSS_RS10765	alanine racemase	Lacidipiscis_RS03870	alanine racemase
LAC1533_RS03805	hypothetical protein	GSS_RS10760	hypothetical protein	Lacidipiscis_RS03875	hypothetical protein
LAC1533_RS03810	type II toxin-antitoxin system PemK/MazF family toxin	GSS_RS10755	type II toxin-antitoxin system PemK/MazF family toxin	Lacidipiscis_RS03880	type II toxin-antitoxin system PemK/MazF family toxin
LAC1533_RS03815	hypothetical protein	GSS_RS10750	hypothetical protein	Lacidipiscis_RS03885	hypothetical protein
LAC1533_RS03820	CBS domain-containing protein	GSS_RS10745	CBS domain-containing protein	Lacidipiscis_RS12660	CBS domain-containing protein
LAC1533_RS03825	L-lactate dehydrogenase	GSS_RS10740	L-lactate dehydrogenase	Lacidipiscis_RS04305	L-lactate dehydrogenase
LAC1533_RS03830	aminoacyl-tRNA hydrolase	GSS_RS10735	aminoacyl-tRNA hydrolase	Lacidipiscis_RS04310	aminoacyl-tRNA hydrolase
LAC1533_RS03835	transcription-repair coupling factor	GSS_RS10730	transcription-repair coupling factor	Lacidipiscis_RS04315	transcription-repair coupling factor
LAC1533_RS03840	sugar transporter	GSS_RS10725	PST polysaccharide transporter	Lacidipiscis_RS04320	sugar transporter
LAC1533_RS03845	RNA-binding S4 domain-containing protein	GSS_RS10720	RNA-binding S4 domain-containing protein	Lacidipiscis_RS04325	RNA-binding S4 domain-containing protein
LAC1533_RS03850	septum formation initiator family protein	GSS_RS10715	septum formation initiator family protein	Lacidipiscis_RS05555	septum formation initiator family protein
LAC1533_RS03855	RNA-binding protein S1	GSS_RS10710	S1 RNA-binding domain containing protein	Lacidipiscis_RS05560	RNA-binding protein S1
LAC1533_RS03860	tRNA lysidine(34) synthetase TilS	GSS_RS13870	hypothetical protein	Lacidipiscis_RS05565	tRNA lysidine(34) synthetase TilS
LAC1533_RS03865	hypoxanthine phosphoribosyltransferase	GSS_RS10700	hypoxanthine phosphoribosyltransferase	Lacidipiscis_RS05570	hypoxanthine phosphoribosyltransferase
LAC1533_RS03870	ATP-dependent metallopeptidase FtsH/Yme1/Tma family protein	GSS_RS10695	ATP-dependent metallopeptidase FtsH/Yme1/Tma family protein	Lacidipiscis_RS05575	ATP-dependent metallopeptidase FtsH/Yme1/Tma family protein
LAC1533_RS03875	Hsp33 family molecular chaperone HslO	GSS_RS10690	Hsp33 family molecular chaperone HslO	Lacidipiscis_RS05580	Hsp33 family molecular chaperone HslO
LAC1533_RS03880	lysine--tRNA ligase	GSS_RS10685	lysine--tRNA ligase	Lacidipiscis_RS05585	lysine--tRNA ligase
LAC1533_RS03920	peptide MFS transporter	GSS_RS07250	peptide MFS transporter	Lacidipiscis_RS00675	peptide MFS transporter
LAC1533_RS03935	pyrroline-5-carboxylate reductase	GSS_RS07265	pyrroline-5-carboxylate reductase	Lacidipiscis_RS00690	pyrroline-5-carboxylate reductase
LAC1533_RS03940	N-acetylglucosamine-6-phosphate deacetylase	GSS_RS07270	N-acetylglucosamine-6-phosphate deacetylase	Lacidipiscis_RS00695	N-acetylglucosamine-6-phosphate deacetylase
LAC1533_RS03945	GntR family transcriptional regulator	GSS_RS07275	GntR family transcriptional regulator	Lacidipiscis_RS00700	GntR family transcriptional regulator
LAC1533_RS03950	class 1b ribonucleoside-diphosphate reductase subunit beta	GSS_RS07280	class 1b ribonucleoside-diphosphate reductase subunit beta	Lacidipiscis_RS06780	class 1b ribonucleoside-diphosphate reductase subunit beta
LAC1533_RS03955	class 1b ribonucleoside-diphosphate reductase subunit alpha	GSS_RS12850	class 1b ribonucleoside-diphosphate reductase subunit alpha	Lacidipiscis_RS06775	class 1b ribonucleoside-diphosphate reductase subunit alpha
LAC1533_RS03960	class Ib ribonucleoside-diphosphate reductase assembly flavoprotein NrdI	GSS_RS07300	class Ib ribonucleoside-diphosphate reductase assembly flavoprotein NrdI	Lacidipiscis_RS06770	class Ib ribonucleoside-diphosphate reductase assembly flavoprotein NrdI
LAC1533_RS03965	glutaredoxin-like protein NrdH	GSS_RS07305	glutaredoxin-like protein NrdH	Lacidipiscis_RS06765	glutaredoxin-like protein NrdH
LAC1533_RS03970	class I SAM-dependent methyltransferase	GSS_RS07310	class I SAM-dependent methyltransferase	Lacidipiscis_RS06760	class I SAM-dependent methyltransferase
LAC1533_RS03975	nucleoside deaminase	GSS_RS07315	nucleoside deaminase	Lacidipiscis_RS06755	nucleoside deaminase
LAC1533_RS03985	DNA polymerase III subunit gamma/tau	GSS_RS07320	DNA polymerase III subunit gamma/tau	Lacidipiscis_RS06745	DNA polymerase III subunit gamma/tau
LAC1533_RS03990	YbaB/EbfC family nucleoid-associated protein	GSS_RS07325	nucleoid-associated protein, YbaB/EbfC family	Lacidipiscis_RS06740	nucleoid-associated protein, YbaB/EbfC family
LAC1533_RS03995	recombination protein RecR	GSS_RS07330	recombination protein RecR	Lacidipiscis_RS06735	recombination protein RecR
LAC1533_RS04000	DUF2508 domain-containing protein	GSS_RS07335	DUF2508 domain-containing protein	Lacidipiscis_RS06730	DUF2508 domain-containing protein
LAC1533_RS04010	hypothetical protein	GSS_RS07345	hypothetical protein	Lacidipiscis_RS06720	hypothetical protein
LAC1533_RS04015	DNA polymerase III subunit delta	GSS_RS07350	DNA polymerase III subunit delta	Lacidipiscis_RS06715	DNA polymerase III subunit delta
LAC1533_RS04020	DUF972 domain-containing protein	GSS_RS07355	DUF972 domain-containing protein	Lacidipiscis_RS06710	DUF972 domain-containing protein
LAC1533_RS04025	16S rRNA (cytidine(1402)-2-O)-methyltransferase	GSS_RS07360	16S rRNA (cytidine(1402)-2-O)-methyltransferase	Lacidipiscis_RS06705	16S rRNA (cytidine(1402)-2-O)-methyltransferase
LAC1533_RS04030	acyl-ACP thioesterase	GSS_RS07365	acyl-ACP thioesterase	Lacidipiscis_RS06700	acyl-ACP thioesterase
LAC1533_RS04050	tRNA (adenosine(37)-N6)-threonylcarbamoyltransferase complex dimerization subunit type 1 TsaB	GSS_RS07375	tRNA (adenosine(37)-N6)-threonylcarbamoyltransferase complex dimerization subunit type 1 TsaB	Lacidipiscis_RS08650	tRNA (adenosine(37)-N6)-threonylcarbamoyltransferase complex dimerization subunit type 1 TsaB
LAC1533_RS04055	N-acetyltransferase	GSS_RS07380	N-acetyltransferase	Lacidipiscis_RS08645	N-acetyltransferase
LAC1533_RS04060	tRNA (adenosine(37)-N6)-threonylcarbamoyltransferase complex transferase subunit TsaD	GSS_RS07385	tRNA (adenosine(37)-N6)-threonylcarbamoyltransferase complex transferase subunit TsaD	Lacidipiscis_RS08640	tRNA (adenosine(37)-N6)-threonylcarbamoyltransferase complex transferase subunit TsaD
LAC1533_RS04070	redox-sensing transcriptional repressor Rex	GSS_RS07395	redox-sensing transcriptional repressor Rex	Lacidipiscis_RS08630	redox-sensing transcriptional repressor Rex
LAC1533_RS04085	CPBP family intramembrane metalloprotease	GSS_RS07400	CPBP family intramembrane metalloprotease	Lacidipiscis_RS08625	CPBP family intramembrane metalloprotease
LAC1533_RS04090	co-chaperone GroES	GSS_RS07405	co-chaperone GroES	Lacidipiscis_RS08620	co-chaperone GroES
LAC1533_RS04095	chaperonin GroEL	GSS_RS07410	chaperonin GroEL	Lacidipiscis_RS08615	chaperonin GroEL
LAC1533_RS04100	APC family permease	GSS_RS07415	APC family permease	Lacidipiscis_RS06600	APC family permease
LAC1533_RS04105	YigZ family protein	GSS_RS07420	YigZ family protein	Lacidipiscis_RS06605	YigZ family protein
LAC1533_RS04110	DNA/RNA helicase	GSS_RS07425	DNA/RNA helicase	Lacidipiscis_RS06610	DNA/RNA helicase
LAC1533_RS04115	ComF family protein	GSS_RS07430	ComF family protein	Lacidipiscis_RS06615	ComF family protein
LAC1533_RS04125	ribosome-associated translation inhibitor RaiA	GSS_RS07435	ribosome-associated translation inhibitor RaiA	Lacidipiscis_RS06620	ribosome-associated translation inhibitor RaiA
LAC1533_RS04130	preprotein translocase subunit SecA	GSS_RS07440	preprotein translocase subunit SecA	Lacidipiscis_RS06625	preprotein translocase subunit SecA
LAC1533_RS04135	peptide chain release factor 2	GSS_RS07445	peptide chain release factor 2	Lacidipiscis_RS06630	peptide chain release factor 2
LAC1533_RS04140	cell division ATP-binding protein FtsE	GSS_RS07450	cell division ATP-binding protein FtsE	Lacidipiscis_RS06635	cell division ATP-binding protein FtsE
LAC1533_RS04145	ABC transporter permease	GSS_RS07455	ABC transporter permease	Lacidipiscis_RS06640	ABC transporter permease
LAC1533_RS04150	PDZ domain-containing protein	GSS_RS07460	PDZ domain-containing protein	Lacidipiscis_RS07610	PDZ domain-containing protein
LAC1533_RS04155	DNA-binding response regulator	GSS_RS07465	DNA-binding response regulator	Lacidipiscis_RS07615	DNA-binding response regulator
LAC1533_RS04160	two-component sensor histidine kinase	GSS_RS07470	two-component sensor histidine kinase	Lacidipiscis_RS07620	sensor histidine kinase
LAC1533_RS04165	PspC domain-containing protein	GSS_RS07475	PspC domain-containing protein	Lacidipiscis_RS00020	PspC domain-containing protein
LAC1533_RS04170	phage holin family protein	GSS_RS07480	phage holin family protein	Lacidipiscis_RS00025	phage holin family protein
LAC1533_RS04180	prolipoprotein diacylglyceryl transferase	GSS_RS07490	prolipoprotein diacylglyceryl transferase	Lacidipiscis_RS00035	prolipoprotein diacylglyceryl transferase
LAC1533_RS04185	thioredoxin-disulfide reductase	GSS_RS07500	thioredoxin-disulfide reductase	Lacidipiscis_RS00040	thioredoxin-disulfide reductase
LAC1533_RS04195	phospho-sugar mutase	GSS_RS07505	phospho-sugar mutase	Lacidipiscis_RS00045	phospho-sugar mutase
LAC1533_RS04200	excinuclease ABC subunit UvrB	GSS_RS07510	excinuclease ABC subunit UvrB	Lacidipiscis_RS00050	excinuclease ABC subunit UvrB
LAC1533_RS04205	excinuclease ABC subunit UvrA	GSS_RS07515	excinuclease ABC subunit UvrA	Lacidipiscis_RS00055	excinuclease ABC subunit UvrA
LAC1533_RS04210	S-ribosylhomocysteine lyase	GSS_RS07520	S-ribosylhomocysteine lyase	Lacidipiscis_RS00060	S-ribosylhomocysteine lyase
LAC1533_RS04215	serine dehydratase	GSS_RS12875	L-serine ammonia-lyase beta subunit	Lacidipiscis_RS00065	serine dehydratase
LAC1533_RS04220	L-serine ammonia-lyase, iron-sulfur-dependent, subunit alpha	GSS_RS07530	L-serine ammonia-lyase, iron-sulfur-dependent, subunit alpha	Lacidipiscis_RS00070	L-serine ammonia-lyase, iron-sulfur-dependent, subunit alpha
LAC1533_RS04225	RNase adapter RapZ	GSS_RS07535	RNase adapter RapZ	Lacidipiscis_RS00075	RNase adapter RapZ
LAC1533_RS04230	hypothetical protein	GSS_RS07540	hypothetical protein	Lacidipiscis_RS00080	hypothetical protein
LAC1533_RS04235	DNA-binding protein WhiA	GSS_RS07545	DNA-binding protein WhiA	Lacidipiscis_RS00085	DNA-binding protein WhiA
LAC1533_RS04240	ATP-dependent Clp protease proteolytic subunit	GSS_RS07550	ATP-dependent Clp protease proteolytic subunit	Lacidipiscis_RS00090	ATP-dependent Clp protease proteolytic subunit
LAC1533_RS04250	RNA polymerase sigma-54 factor	GSS_RS07560	RNA polymerase sigma-54 factor	Lacidipiscis_RS05880	RNA polymerase sigma-54 factor
LAC1533_RS04255	SorC family transcriptional regulator	GSS_RS07565	SorC family transcriptional regulator	Lacidipiscis_RS05885	SorC family transcriptional regulator
LAC1533_RS04260	type I glyceraldehyde-3-phosphate dehydrogenase	GSS_RS07570	type I glyceraldehyde-3-phosphate dehydrogenase	Lacidipiscis_RS05890	type I glyceraldehyde-3-phosphate dehydrogenase
LAC1533_RS04270	triose-phosphate isomerase	GSS_RS07580	triose-phosphate isomerase	Lacidipiscis_RS05900	triose-phosphate isomerase
LAC1533_RS04290	preprotein translocase subunit SecG	GSS_RS07585	preprotein translocase subunit SecG	Lacidipiscis_RS05905	preprotein translocase subunit SecG
LAC1533_RS04295	ribonuclease R	GSS_RS07595	ribonuclease R	Lacidipiscis_RS05910	ribonuclease R
LAC1533_RS04300	SsrA-binding protein SmpB	GSS_RS07600	SsrA-binding protein SmpB	Lacidipiscis_RS05915	SsrA-binding protein SmpB
LAC1533_RS04320	hypothetical protein	GSS_RS07605	hypothetical protein	Lacidipiscis_RS12625	hypothetical protein
LAC1533_RS04325	Cof-type HAD-IIB family hydrolase	GSS_RS07610	Cof-type HAD-IIB family hydrolase	Lacidipiscis_RS12620	Cof-type HAD-IIB family hydrolase
LAC1533_RS04330	uracil-DNA glycosylase	GSS_RS07615	uracil-DNA glycosylase	Lacidipiscis_RS12615	uracil-DNA glycosylase
LAC1533_RS04335	phosphate acetyltransferase	GSS_RS07620	phosphate acetyltransferase	Lacidipiscis_RS12610	phosphate acetyltransferase
LAC1533_RS04340	tRNA (adenosine(37)-N6)-threonylcarbamoyltransferase complex ATPase subunit type 1 TsaE	GSS_RS07625	tRNA (adenosine(37)-N6)-threonylcarbamoyltransferase complex ATPase subunit type 1 TsaE	Lacidipiscis_RS12605	tRNA (adenosine(37)-N6)-threonylcarbamoyltransferase complex ATPase subunit type 1 TsaE
LAC1533_RS04345	exonuclease	GSS_RS07630	exonuclease	Lacidipiscis_RS12600	hypothetical protein
LAC1533_RS04355	DUF1361 domain-containing protein	GSS_RS07640	DUF1361 domain-containing protein	Lacidipiscis_RS12590	DUF1361 domain-containing protein
LAC1533_RS04360	TIGR00159 family protein	GSS_RS07645	TIGR00159 family protein	Lacidipiscis_RS12585	TIGR00159 family protein
LAC1533_RS04370	phosphoglucosamine mutase	GSS_RS07655	phosphoglucosamine mutase	Lacidipiscis_RS12575	phosphoglucosamine mutase
LAC1533_RS04375	hypothetical protein	GSS_RS07660	hypothetical protein	Lacidipiscis_RS12570	hypothetical protein
LAC1533_RS04390	hypothetical protein	GSS_RS07665	hypothetical protein	Lacidipiscis_RS12565	hypothetical protein
LAC1533_RS04395	ABC transporter	GSS_RS07670	ABC transporter	Lacidipiscis_RS09590	ABC transporter
LAC1533_RS04400	phosphate ABC transporter permease subunit PstC	GSS_RS07675	phosphate ABC transporter permease subunit PstC	Lacidipiscis_RS09585	phosphate ABC transporter permease subunit PstC
LAC1533_RS04405	phosphate ABC transporter, permease protein PstA	GSS_RS07680	phosphate ABC transporter, permease protein PstA	Lacidipiscis_RS09580	phosphate ABC transporter, permease protein PstA
LAC1533_RS04410	phosphate ABC transporter ATP-binding protein	GSS_RS07685	phosphate ABC transporter ATP-binding protein	Lacidipiscis_RS09575	phosphate ABC transporter ATP-binding protein
LAC1533_RS04415	phosphate ABC transporter ATP-binding protein	GSS_RS07690	phosphate ABC transporter ATP-binding protein	Lacidipiscis_RS09570	phosphate ABC transporter ATP-binding protein
LAC1533_RS04420	phosphate transport system regulatory protein PhoU	GSS_RS07695	phosphate transport system regulatory protein PhoU	Lacidipiscis_RS09565	phosphate transport system regulatory protein PhoU
LAC1533_RS04425	fructose-1,6-bisphosphate aldolase, class II	GSS_RS07700	fructose-1,6-bisphosphate aldolase, class II	Lacidipiscis_RS09560	fructose-1,6-bisphosphate aldolase, class II
LAC1533_RS04430	IS1182 family transposase	GSS_RS07705	IS1182 family transposase	Lacidipiscis_RS09555	IS5/IS1182 family transposase
LAC1533_RS04440	DUF1836 domain-containing protein	GSS_RS07710	DUF1836 domain-containing protein	Lacidipiscis_RS09545	DUF1836 domain-containing protein
LAC1533_RS04445	hemolysin III	GSS_RS07715	membrane protein	Lacidipiscis_RS09540	hemolysin III
LAC1533_RS04450	ArsR family transcriptional regulator	GSS_RS07720	ArsR family transcriptional regulator	Lacidipiscis_RS09535	ArsR family transcriptional regulator
LAC1533_RS04455	RNase HI	GSS_RS07725	RNase HI	Lacidipiscis_RS09530	RNase HI
LAC1533_RS04460	hypothetical protein	GSS_RS07730	hypothetical protein	Lacidipiscis_RS09525	hypothetical protein
LAC1533_RS04465	hypothetical protein	GSS_RS07735	hypothetical protein	Lacidipiscis_RS09520	hypothetical protein
LAC1533_RS04480	glucose-6-phosphate isomerase	GSS_RS07745	glucose-6-phosphate isomerase	Lacidipiscis_RS09150	glucose-6-phosphate isomerase
LAC1533_RS04490	CBS domain-containing protein	GSS_RS07750	CBS domain-containing protein	Lacidipiscis_RS11845	CBS domain-containing protein
LAC1533_RS04500	amidohydrolase	GSS_RS07760	N-acetyldiaminopimelate deacetylase	Lacidipiscis_RS11855	amidohydrolase
LAC1533_RS04505	mechanosensitive ion channel family protein	GSS_RS07765	mechanosensitive ion channel family protein	Lacidipiscis_RS11860	mechanosensitive ion channel family protein
LAC1533_RS04510	DUF948 domain-containing protein	GSS_RS07770	DUF948 domain-containing protein	Lacidipiscis_RS11865	DUF948 domain-containing protein
LAC1533_RS04515	hypothetical protein	GSS_RS07775	hypothetical protein	Lacidipiscis_RS11870	hypothetical protein
LAC1533_RS04520	aminopeptidase P family protein	GSS_RS07780	aminopeptidase P family protein	Lacidipiscis_RS11875	aminopeptidase P family protein
LAC1533_RS04525	catabolite control protein A	GSS_RS07785	catabolite control protein A	Lacidipiscis_RS11880	catabolite control protein A
LAC1533_RS04530	YebC/PmpR family DNA-binding transcriptional regulator	GSS_RS07790	YebC/PmpR family DNA-binding transcriptional regulator	Lacidipiscis_RS11885	YebC/PmpR family DNA-binding transcriptional regulator
LAC1533_RS04535	competence protein ComG	GSS_RS07795	competence protein ComG	Lacidipiscis_RS11890	competence protein ComG
LAC1533_RS04540	competence protein ComG	GSS_RS07800	ComG operon protein 2	Lacidipiscis_RS11895	competence protein ComG
LAC1533_RS04545	prepilin-type N-terminal cleavage/methylation domain-containing protein	GSS_RS07805	prepilin-type N-terminal cleavage/methylation domain-containing protein	Lacidipiscis_RS11900	prepilin-type N-terminal cleavage/methylation domain-containing protein
LAC1533_RS04550	prepilin-type N-terminal cleavage/methylation domain-containing protein	GSS_RS07810	prepilin-type N-terminal cleavage/methylation domain-containing protein	Lacidipiscis_RS11905	prepilin-type N-terminal cleavage/methylation domain-containing protein
LAC1533_RS04555	hypothetical protein	GSS_RS07815	hypothetical protein	Lacidipiscis_RS11910	hypothetical protein
LAC1533_RS04560	type II secretion system protein	GSS_RS07820	type II secretion system protein	Lacidipiscis_RS11915	prepilin-type cleavage/methylation domain-containing protein
LAC1533_RS04565	hypothetical protein	GSS_RS12905	hypothetical protein	Lacidipiscis_RS11920	hypothetical protein
LAC1533_RS04570	class I SAM-dependent methyltransferase	GSS_RS07830	class I SAM-dependent methyltransferase	Lacidipiscis_RS11925	class I SAM-dependent methyltransferase
LAC1533_RS04580	multifunctional 2,3-cyclic-nucleotide 2-phosphodiesterase/5-nucleotidase/3-nucleotidase	GSS_RS07840	multifunctional 2,3-cyclic-nucleotide 2-phosphodiesterase/5-nucleotidase/3-nucleotidase	Lacidipiscis_RS11935	multifunctional 2,3-cyclic-nucleotide 2-phosphodiesterase/5-nucleotidase/3-nucleotidase
LAC1533_RS04590	TIGR01457 family HAD-type hydrolase	GSS_RS07850	TIGR01457 family HAD-type hydrolase	Lacidipiscis_RS13380	TIGR01457 family HAD-type hydrolase
LAC1533_RS04595	TIGR01906 family membrane protein	GSS_RS07855	TIGR01906 family membrane protein	Lacidipiscis_RS13385	TIGR01906 family membrane protein
LAC1533_RS04600	cytochrome o ubiquinol oxidase	GSS_RS07860	membrane protein	Lacidipiscis_RS13390	cytochrome o ubiquinol oxidase
LAC1533_RS04605	NAD(P)/FAD-dependent oxidoreductase	GSS_RS07865	NAD(P)/FAD-dependent oxidoreductase	Lacidipiscis_RS13395	NAD(P)/FAD-dependent oxidoreductase
LAC1533_RS04610	peptidylprolyl isomerase	GSS_RS07870	peptidyl-prolyl cis-trans isomerase	Lacidipiscis_RS13400	peptidylprolyl isomerase
LAC1533_RS04615	general stress protein	GSS_RS07875	general stress protein	Lacidipiscis_RS13405	general stress protein
LAC1533_RS04740	methionine adenosyltransferase	GSS_RS11040	methionine adenosyltransferase	Lacidipiscis_RS11620	methionine adenosyltransferase
LAC1533_RS04745	LysM peptidoglycan-binding domain-containing protein	GSS_RS13355	LysM peptidoglycan-binding domain-containing protein	Lacidipiscis_RS11630	LysM peptidoglycan-binding domain-containing protein
LAC1533_RS04750	leucine--tRNA ligase	GSS_RS11050	leucine--tRNA ligase	Lacidipiscis_RS11635	leucine--tRNA ligase
LAC1533_RS04755	polysaccharide biosynthesis protein	GSS_RS11055	polysaccharide biosynthesis protein	Lacidipiscis_RS11640	polysaccharide biosynthesis protein
LAC1533_RS04760	hypothetical protein	GSS_RS11060	hypothetical protein	Lacidipiscis_RS11645	hypothetical protein
LAC1533_RS04810	NAD(P)H-hydrate dehydratase	GSS_RS04815	NAD(P)H-hydrate dehydratase	Lacidipiscis_RS12805	NAD(P)H-hydrate dehydratase
LAC1533_RS04815	dienelactone hydrolase	GSS_RS04810	dienelactone hydrolase	Lacidipiscis_RS12800	dienelactone hydrolase
LAC1533_RS04830	hypothetical protein	GSS_RS04800	hypothetical protein	Lacidipiscis_RS12790	hypothetical protein
LAC1533_RS04835	universal stress protein	GSS_RS04795	universal stress protein	Lacidipiscis_RS12785	universal stress protein
LAC1533_RS04840	hypothetical protein	GSS_RS04790	hypothetical protein	Lacidipiscis_RS12780	hypothetical protein
LAC1533_RS04855	hypothetical protein	GSS_RS04785	hypothetical protein	Lacidipiscis_RS12775	hypothetical protein
LAC1533_RS04860	acetate kinase	GSS_RS04780	acetate kinase	Lacidipiscis_RS12770	acetate kinase
LAC1533_RS04865	hypothetical protein	GSS_RS04775	hypothetical protein	Lacidipiscis_RS12765	hypothetical protein
LAC1533_RS04870	deoxyguanosine kinase	GSS_RS04770	deoxyguanosine kinase	Lacidipiscis_RS12760	deoxyguanosine kinase
LAC1533_RS04880	adenylosuccinate lyase	GSS_RS04765	adenylosuccinate lyase	Lacidipiscis_RS12755	adenylosuccinate lyase
LAC1533_RS04885	LysR family transcriptional regulator	GSS_RS04760	LysR family transcriptional regulator	Lacidipiscis_RS12750	LysR family transcriptional regulator
LAC1533_RS04890	MATE family efflux transporter	GSS_RS04750	MATE family efflux transporter	Lacidipiscis_RS12745	MATE family efflux transporter
LAC1533_RS04895	hypothetical protein	GSS_RS04745	hypothetical protein	Lacidipiscis_RS06335	hypothetical protein
LAC1533_RS04905	arginine--tRNA ligase	GSS_RS04735	arginine--tRNA ligase	Lacidipiscis_RS06325	arginine--tRNA ligase
LAC1533_RS04910	Crp/Fnr family transcriptional regulator	GSS_RS04730	Crp/Fnr family transcriptional regulator	Lacidipiscis_RS08345	Crp/Fnr family transcriptional regulator
LAC1533_RS04915	ArgR family transcriptional regulator	GSS_RS04725	ArgR family transcriptional regulator	Lacidipiscis_RS08350	ArgR family transcriptional regulator
LAC1533_RS04920	carboxypeptidase	GSS_RS04720	carboxypeptidase	Lacidipiscis_RS08355	carboxypeptidase
LAC1533_RS04925	hypothetical protein	GSS_RS04715	hypothetical protein	Lacidipiscis_RS08360	hypothetical protein
LAC1533_RS04930	HD domain-containing protein	GSS_RS04710	HD domain-containing protein	Lacidipiscis_RS08365	HD domain-containing protein
LAC1533_RS04935	peptidylprolyl isomerase	GSS_RS04705	peptidylprolyl isomerase	Lacidipiscis_RS08370	peptidylprolyl isomerase
LAC1533_RS04940	hypothetical protein	GSS_RS04700	hypothetical protein	Lacidipiscis_RS08375	hypothetical protein
LAC1533_RS04945	HIT family protein	GSS_RS04695	HIT family protein	Lacidipiscis_RS08380	HIT family protein
LAC1533_RS04950	ABC transporter ATP-binding protein	GSS_RS12615	ABC transporter ATP-binding protein	Lacidipiscis_RS08385	ABC transporter ATP-binding protein
LAC1533_RS04955	protein ecsB	GSS_RS04685	protein ecsB	Lacidipiscis_RS08390	protein EcsB
LAC1533_RS04960	phosphotransferase	GSS_RS04680	phosphotransferase	Lacidipiscis_RS08395	phosphotransferase
LAC1533_RS04965	tRNA (guanosine(46)-N7)-methyltransferase TrmB	GSS_RS04675	tRNA (guanosine(46)-N7)-methyltransferase TrmB	Lacidipiscis_RS05790	tRNA (guanosine(46)-N7)-methyltransferase TrmB
LAC1533_RS04970	thioredoxin	GSS_RS04670	thioredoxin	Lacidipiscis_RS05785	thioredoxin
LAC1533_RS04975	DUF4479 domain-containing protein	GSS_RS04665	DUF4479 domain-containing protein	Lacidipiscis_RS05780	DUF4479 domain-containing protein
LAC1533_RS04980	DNA translocase FtsK	GSS_RS04660	DNA translocase FtsK	Lacidipiscis_RS05775	DNA translocase FtsK
LAC1533_RS04985	UDP-N-acetylmuramate--L-alanine ligase	GSS_RS04655	UDP-N-acetylmuramate--L-alanine ligase	Lacidipiscis_RS05770	UDP-N-acetylmuramate--L-alanine ligase
LAC1533_RS04990	BAX inhibitor (BI)-1/YccA family protein	GSS_RS04650	BAX inhibitor (BI)-1/YccA family protein	Lacidipiscis_RS05765	BAX inhibitor (BI)-1/YccA family protein
LAC1533_RS04995	DNA polymerase I	GSS_RS04645	DNA polymerase I	Lacidipiscis_RS05760	DNA polymerase I
LAC1533_RS05000	DNA-formamidopyrimidine glycosylase	GSS_RS04635	DNA-formamidopyrimidine glycosylase	Lacidipiscis_RS05755	DNA-formamidopyrimidine glycosylase
LAC1533_RS05005	transcriptional repressor NrdR	GSS_RS04630	transcriptional repressor NrdR	Lacidipiscis_RS05745	transcriptional repressor NrdR
LAC1533_RS05010	chromosome replication initiation / membrane attachment protein	GSS_RS04625	chromosome replication initiation / membrane attachment protein	Lacidipiscis_RS05740	chromosome replication initiation / membrane attachment protein
LAC1533_RS05015	primosomal protein DnaI	GSS_RS04620	primosomal protein DnaI	Lacidipiscis_RS05735	primosomal protein DnaI
LAC1533_RS05020	threonine--tRNA ligase	GSS_RS04615	threonine--tRNA ligase	Lacidipiscis_RS05730	threonine--tRNA ligase
LAC1533_RS05025	translation initiation factor IF-3	GSS_RS04610	translation initiation factor IF-3	Lacidipiscis_RS05725	translation initiation factor IF-3
LAC1533_RS05030	50S ribosomal protein L35	GSS_RS04605	50S ribosomal protein L35	Lacidipiscis_RS05720	50S ribosomal protein L35
LAC1533_RS05035	50S ribosomal protein L20	GSS_RS04600	50S ribosomal protein L20	Lacidipiscis_RS05715	50S ribosomal protein L20
LAC1533_RS05040	YqeG family HAD IIIA-type phosphatase	GSS_RS04595	YqeG family HAD IIIA-type phosphatase	Lacidipiscis_RS05710	YqeG family HAD IIIA-type phosphatase
LAC1533_RS05045	ribosome biogenesis GTPase YqeH	GSS_RS04590	ribosome biogenesis GTPase YqeH	Lacidipiscis_RS05705	ribosome biogenesis GTPase YqeH
LAC1533_RS05050	ribosome assembly RNA-binding protein YhbY	GSS_RS04585	ribosome assembly RNA-binding protein YhbY	Lacidipiscis_RS05700	ribosome assembly RNA-binding protein YhbY
LAC1533_RS05055	nicotinate-nucleotide adenylyltransferase	GSS_RS04580	nicotinate-nucleotide adenylyltransferase	Lacidipiscis_RS05695	nicotinate-nucleotide adenylyltransferase
LAC1533_RS05060	HD domain-containing protein	GSS_RS04570	HD domain-containing protein	Lacidipiscis_RS05690	HD domain-containing protein
LAC1533_RS05065	ribosome silencing factor	GSS_RS04565	ribosome silencing factor	Lacidipiscis_RS05685	ribosome silencing factor
LAC1533_RS05070	class I SAM-dependent methyltransferase	GSS_RS04560	class I SAM-dependent methyltransferase	Lacidipiscis_RS05680	class I SAM-dependent methyltransferase
LAC1533_RS05075	nucleotidyltransferase	GSS_RS04555	nucleotidyltransferase	Lacidipiscis_RS05675	nucleotidyltransferase
LAC1533_RS05080	hypothetical protein	GSS_RS04550	hypothetical protein	Lacidipiscis_RS05670	DNA-binding protein
LAC1533_RS05085	50S ribosomal protein L32	GSS_RS04545	50S ribosomal protein L32	Lacidipiscis_RS05665	50S ribosomal protein L32
LAC1533_RS05090	YihA family ribosome biogenesis GTP-binding protein	GSS_RS04540	YihA family ribosome biogenesis GTP-binding protein	Lacidipiscis_RS05660	YihA family ribosome biogenesis GTP-binding protein
LAC1533_RS05095	nucleotide pyrophosphohydrolase	GSS_RS04535	nucleotide pyrophosphohydrolase	Lacidipiscis_RS05655	nucleotide pyrophosphohydrolase
LAC1533_RS05100	hypothetical protein	GSS_RS12605	hypothetical protein	Lacidipiscis_RS05650	hypothetical protein
LAC1533_RS05105	amino acid ABC transporter ATP-binding protein	GSS_RS04525	amino acid ABC transporter ATP-binding protein	Lacidipiscis_RS05645	amino acid ABC transporter ATP-binding protein
LAC1533_RS05115	GTPase ObgE	GSS_RS04515	GTPase ObgE	Lacidipiscis_RS05635	GTPase ObgE
LAC1533_RS05120	acetyltransferase	GSS_RS04510	acetyltransferase	Lacidipiscis_RS05630	acetyltransferase
LAC1533_RS05125	hypothetical protein	GSS_RS04505	hypothetical protein	Lacidipiscis_RS11440	hypothetical protein
LAC1533_RS05135	ribonuclease Z	GSS_RS04495	ribonuclease Z	Lacidipiscis_RS09595	ribonuclease Z
LAC1533_RS05140	SDR family NAD(P)-dependent oxidoreductase	GSS_RS04490	SDR family NAD(P)-dependent oxidoreductase	Lacidipiscis_RS09600	SDR family NAD(P)-dependent oxidoreductase
LAC1533_RS05145	DUF1049 domain-containing protein	GSS_RS04485	DUF1049 domain-containing protein	Lacidipiscis_RS09605	DUF1049 domain-containing protein
LAC1533_RS05150	single-stranded-DNA-specific exonuclease RecJ	GSS_RS04480	single-stranded-DNA-specific exonuclease RecJ	Lacidipiscis_RS09610	single-stranded-DNA-specific exonuclease RecJ
LAC1533_RS05155	adenine phosphoribosyltransferase	GSS_RS04475	adenine phosphoribosyltransferase	Lacidipiscis_RS09615	adenine phosphoribosyltransferase
LAC1533_RS05160	hypothetical protein	GSS_RS04465	hypothetical protein	Lacidipiscis_RS09160	hypothetical protein
LAC1533_RS05165	helicase-exonuclease AddAB subunit AddA	GSS_RS04460	helicase-exonuclease AddAB subunit AddA	Lacidipiscis_RS09165	helicase-exonuclease AddAB subunit AddA
LAC1533_RS05170	hypothetical protein	GSS_RS04455	hypothetical protein	Lacidipiscis_RS09170	hypothetical protein
LAC1533_RS05175	hypothetical protein	GSS_RS04450	hypothetical protein	Lacidipiscis_RS09175	hypothetical protein
LAC1533_RS05180	50S ribosomal protein L33	GSS_RS04440	50S ribosomal protein L33	Lacidipiscis_RS09640	50S ribosomal protein L33
LAC1533_RS05195	5-formyltetrahydrofolate cyclo-ligase	GSS_RS12595	5-formyltetrahydrofolate cyclo-ligase	Lacidipiscis_RS09645	5-formyltetrahydrofolate cyclo-ligase
LAC1533_RS05200	rhomboid family intramembrane serine protease	GSS_RS04425	rhomboid family intramembrane serine protease	Lacidipiscis_RS09650	rhomboid family intramembrane serine protease
LAC1533_RS05205	DUF910 domain-containing protein	GSS_RS04420	DUF910 domain-containing protein	Lacidipiscis_RS09655	DUF910 domain-containing protein
LAC1533_RS05210	glucokinase	GSS_RS04415	glucokinase	Lacidipiscis_RS09660	glucokinase
LAC1533_RS05215	rhodanese-like domain-containing protein	GSS_RS04410	rhodanese-like domain-containing protein	Lacidipiscis_RS09665	rhodanese-like domain-containing protein
LAC1533_RS05220	tRNA (adenosine(37)-N6)-dimethylallyltransferase MiaA	GSS_RS04405	tRNA (adenosine(37)-N6)-dimethylallyltransferase MiaA	Lacidipiscis_RS09670	tRNA (adenosine(37)-N6)-dimethylallyltransferase MiaA
LAC1533_RS05225	MerR family transcriptional regulator	GSS_RS04400	MerR family transcriptional regulator	Lacidipiscis_RS09675	MerR family transcriptional regulator
LAC1533_RS05230	type I glutamate--ammonia ligase	GSS_RS04395	type I glutamate--ammonia ligase	Lacidipiscis_RS09680	type I glutamate--ammonia ligase
LAC1533_RS05240	guanylate kinase	GSS_RS04385	guanylate kinase	Lacidipiscis_RS09685	guanylate kinase
LAC1533_RS05245	DNA-directed RNA polymerase subunit omega	GSS_RS04380	DNA-directed RNA polymerase subunit omega	Lacidipiscis_RS09690	DNA-directed RNA polymerase subunit omega
LAC1533_RS05250	bifunctional phosphopantothenoylcysteine decarboxylase/phosphopantothenate--cysteine ligase CoaBC	GSS_RS12590	bifunctional phosphopantothenoylcysteine decarboxylase/phosphopantothenate--cysteine ligase CoaBC	Lacidipiscis_RS09695	bifunctional phosphopantothenoylcysteine decarboxylase/phosphopantothenate--cysteine ligase CoaBC
LAC1533_RS05260	methionyl-tRNA formyltransferase	GSS_RS04360	methionyl-tRNA formyltransferase	Lacidipiscis_RS09705	methionyl-tRNA formyltransferase
LAC1533_RS05265	16S rRNA (cytosine(967)-C(5))-methyltransferase RsmB	GSS_RS04355	16S rRNA (cytosine(967)-C(5))-methyltransferase RsmB	Lacidipiscis_RS09710	16S rRNA (cytosine(967)-C(5))-methyltransferase RsmB
LAC1533_RS05270	serine/threonine-protein phosphatase	GSS_RS04350	serine/threonine-protein phosphatase	Lacidipiscis_RS09715	serine/threonine-protein phosphatase
LAC1533_RS05280	ribosome small subunit-dependent GTPase A	GSS_RS04330	ribosome small subunit-dependent GTPase A	Lacidipiscis_RS09725	ribosome small subunit-dependent GTPase A
LAC1533_RS05285	ribulose-phosphate 3-epimerase	GSS_RS04325	ribulose-phosphate 3-epimerase	Lacidipiscis_RS09730	ribulose-phosphate 3-epimerase
LAC1533_RS05290	thiamine diphosphokinase	GSS_RS04320	thiamine diphosphokinase	Lacidipiscis_RS09735	thiamine diphosphokinase
LAC1533_RS05295	50S ribosomal protein L28	GSS_RS04315	50S ribosomal protein L28	Lacidipiscis_RS09740	50S ribosomal protein L28
LAC1533_RS05300	Asp23/Gls24 family envelope stress response protein	GSS_RS04310	Asp23/Gls24 family envelope stress response protein	Lacidipiscis_RS09745	Asp23/Gls24 family envelope stress response protein
LAC1533_RS05305	DAK2 domain-containing protein	GSS_RS04305	DAK2 domain-containing protein	Lacidipiscis_RS09750	DAK2 domain-containing protein
LAC1533_RS05315	phosphate acyltransferase PlsX	GSS_RS04295	phosphate acyltransferase PlsX	Lacidipiscis_RS09760	phosphate acyltransferase PlsX
LAC1533_RS05325	acyl carrier protein	GSS_RS04290	acyl carrier protein	Lacidipiscis_RS09765	acyl carrier protein
LAC1533_RS05330	ribonuclease III	GSS_RS04275	ribonuclease III	Lacidipiscis_RS09770	ribonuclease III
LAC1533_RS05335	chromosome segregation protein SMC	GSS_RS12570	chromosome segregation protein SMC	Lacidipiscis_RS09775	chromosome segregation protein SMC
LAC1533_RS05340	signal recognition particle-docking protein FtsY	GSS_RS04255	signal recognition particle-docking protein FtsY	Lacidipiscis_RS09780	signal recognition particle-docking protein FtsY
LAC1533_RS05355	30S ribosomal protein S16	GSS_RS04240	30S ribosomal protein S16	Lacidipiscis_RS09795	30S ribosomal protein S16
LAC1533_RS05360	KH domain-containing protein	GSS_RS04235	KH domain-containing protein	Lacidipiscis_RS09800	KH domain-containing protein
LAC1533_RS05365	ribosome maturation factor RimM	GSS_RS04230	ribosome maturation factor RimM	Lacidipiscis_RS09805	ribosome maturation factor RimM
LAC1533_RS05370	tRNA (guanosine(37)-N1)-methyltransferase TrmD	GSS_RS04225	tRNA (guanosine(37)-N1)-methyltransferase TrmD	Lacidipiscis_RS09810	tRNA (guanosine(37)-N1)-methyltransferase TrmD
LAC1533_RS05375	50S ribosomal protein L19	GSS_RS04220	50S ribosomal protein L19	Lacidipiscis_RS09815	50S ribosomal protein L19
LAC1533_RS05385	UMP kinase	GSS_RS04215	UMP kinase	Lacidipiscis_RS09820	UMP kinase
LAC1533_RS05390	ribosome recycling factor	GSS_RS04210	ribosome recycling factor	Lacidipiscis_RS09825	ribosome recycling factor
LAC1533_RS05395	isoprenyl transferase	GSS_RS04205	isoprenyl transferase	Lacidipiscis_RS09830	isoprenyl transferase
LAC1533_RS05400	phosphatidate cytidylyltransferase	GSS_RS04200	phosphatidate cytidylyltransferase	Lacidipiscis_RS09835	phosphatidate cytidylyltransferase
LAC1533_RS05405	RIP metalloprotease RseP	GSS_RS04195	RIP metalloprotease RseP	Lacidipiscis_RS09840	RIP metalloprotease RseP
LAC1533_RS05410	proline--tRNA ligase	GSS_RS04190	proline--tRNA ligase	Lacidipiscis_RS09845	proline--tRNA ligase
LAC1533_RS05415	PolC-type DNA polymerase III	GSS_RS04185	PolC-type DNA polymerase III	Lacidipiscis_RS09850	PolC-type DNA polymerase III
LAC1533_RS05420	ribosome maturation factor RimP	GSS_RS04180	ribosome maturation factor RimP	Lacidipiscis_RS09855	ribosome maturation factor RimP
LAC1533_RS05425	transcription termination/antitermination protein NusA	GSS_RS04175	transcription termination/antitermination protein NusA	Lacidipiscis_RS09860	transcription termination/antitermination protein NusA
LAC1533_RS05430	DUF448 domain-containing protein	GSS_RS04170	DUF448 domain-containing protein	Lacidipiscis_RS09865	DUF448 domain-containing protein
LAC1533_RS05435	hypothetical protein	GSS_RS04165	hypothetical protein	Lacidipiscis_RS09870	hypothetical protein
LAC1533_RS05440	translation initiation factor IF-2	GSS_RS04160	translation initiation factor IF-2	Lacidipiscis_RS09875	translation initiation factor IF-2
LAC1533_RS05445	30S ribosome-binding factor RbfA	GSS_RS04155	30S ribosome-binding factor RbfA	Lacidipiscis_RS09880	30S ribosome-binding factor RbfA
LAC1533_RS05450	tRNA pseudouridine(55) synthase TruB	GSS_RS04150	tRNA pseudouridine(55) synthase TruB	Lacidipiscis_RS09885	tRNA pseudouridine(55) synthase TruB
LAC1533_RS05455	riboflavin biosynthesis protein RibF	GSS_RS04145	bifunctional riboflavin kinase/FAD synthetase	Lacidipiscis_RS09890	riboflavin biosynthesis protein RibF
LAC1533_RS05460	heat-inducible transcription repressor HrcA	GSS_RS04140	heat-inducible transcription repressor HrcA	Lacidipiscis_RS09895	heat-inducible transcription repressor HrcA
LAC1533_RS05465	nucleotide exchange factor GrpE	GSS_RS04135	nucleotide exchange factor GrpE	Lacidipiscis_RS09900	nucleotide exchange factor GrpE
LAC1533_RS05470	molecular chaperone DnaK	GSS_RS04130	molecular chaperone DnaK	Lacidipiscis_RS09905	molecular chaperone DnaK
LAC1533_RS05475	molecular chaperone DnaJ	GSS_RS04125	molecular chaperone DnaJ	Lacidipiscis_RS09910	molecular chaperone DnaJ
LAC1533_RS05480	nucleoside deoxyribosyltransferase	GSS_RS04115	nucleoside deoxyribosyltransferase	Lacidipiscis_RS10135	nucleoside 2-deoxyribosyltransferase
LAC1533_RS05485	N-acetyltransferase	GSS_RS04110	N-acetyltransferase	Lacidipiscis_RS00175	N-acetyltransferase
LAC1533_RS05490	alpha/beta hydrolase	GSS_RS04105	alpha/beta hydrolase	Lacidipiscis_RS00170	alpha/beta hydrolase
LAC1533_RS05495	pyruvate oxidase	GSS_RS04100	pyruvate oxidase	Lacidipiscis_RS00160	pyruvate oxidase
LAC1533_RS05500	serine hydroxymethyltransferase	GSS_RS04095	serine hydroxymethyltransferase	Lacidipiscis_RS00155	serine hydroxymethyltransferase
LAC1533_RS05505	N-acetyltransferase	GSS_RS04090	N-acetyltransferase	Lacidipiscis_RS06260	N-acetyltransferase
LAC1533_RS05510	aldo/keto reductase	GSS_RS04085	aldo/keto reductase	Lacidipiscis_RS06265	aldo/keto reductase
LAC1533_RS05515	hypothetical protein	GSS_RS04080	hypothetical protein	Lacidipiscis_RS06270	hypothetical protein
LAC1533_RS05520	TIGR00730 family Rossman fold protein	GSS_RS04075	TIGR00730 family Rossman fold protein	Lacidipiscis_RS06275	TIGR00730 family Rossman fold protein
LAC1533_RS05530	elongation factor 4	GSS_RS04060	elongation factor 4	Lacidipiscis_RS06285	elongation factor 4
LAC1533_RS05540	death-on-curing family protein	GSS_RS13715	death-on-curing family protein	Lacidipiscis_RS07940	type II toxin-antitoxin system death-on-curing family toxin
LAC1533_RS05550	IS30 family transposase	GSS_RS04040	IS30 family transposase	Lacidipiscis_RS10055	IS30 family transposase
LAC1533_RS05575	hypothetical protein	GSS_RS04025	hypothetical protein	Lacidipiscis_RS10045	hypothetical protein
LAC1533_RS05590	type VI secretion protein ImpB	GSS_RS04010	type VI secretion protein ImpB	Lacidipiscis_RS07640	excinuclease ABC subunit A
LAC1533_RS05595	hypothetical protein	GSS_RS04005	hypothetical protein	Lacidipiscis_RS07645	hypothetical protein
LAC1533_RS05600	RNA methyltransferase	GSS_RS04000	RNA methyltransferase	Lacidipiscis_RS07650	RNA methyltransferase
LAC1533_RS05605	hydrolase	GSS_RS03995	hydrolase	Lacidipiscis_RS07655	hydrolase
LAC1533_RS05610	transcriptional regulator	GSS_RS11445	transcriptional regulator	Lacidipiscis_RS07660	transcriptional regulator
LAC1533_RS05615	phenylalanine--tRNA ligase subunit alpha	GSS_RS03990	phenylalanine--tRNA ligase subunit alpha	Lacidipiscis_RS07665	phenylalanine--tRNA ligase subunit alpha
LAC1533_RS05630	uridine kinase	GSS_RS03975	uridine kinase	Lacidipiscis_RS11335	uridine kinase
LAC1533_RS05635	transcription elongation factor GreA	GSS_RS03970	transcription elongation factor GreA	Lacidipiscis_RS11330	transcription elongation factor GreA
LAC1533_RS05650	NADPH-dependent oxidoreductase	GSS_RS12530	NADPH-dependent oxidoreductase	Lacidipiscis_RS01510	NADPH-dependent oxidoreductase
LAC1533_RS05655	hypothetical protein	GSS_RS03955	hypothetical protein	Lacidipiscis_RS01505	hypothetical protein
LAC1533_RS05660	nucleoside hydrolase	GSS_RS03950	nucleoside hydrolase	Lacidipiscis_RS01500	nucleoside hydrolase
LAC1533_RS05670	16S rRNA (uracil(1498)-N(3))-methyltransferase	GSS_RS03940	16S rRNA (uracil(1498)-N(3))-methyltransferase	Lacidipiscis_RS01480	16S rRNA (uracil(1498)-N(3))-methyltransferase
LAC1533_RS05930	hypothetical protein	GSS_RS03935	hypothetical protein	Lacidipiscis_RS01240	hypothetical protein
LAC1533_RS05935	bifunctional (p)ppGpp synthetase/guanosine-3,5-bis(diphosphate) 3-pyrophosphohydrolase	GSS_RS03930	bifunctional (p)ppGpp synthetase/guanosine-3,5-bis(diphosphate) 3-pyrophosphohydrolase	Lacidipiscis_RS01235	bifunctional (p)ppGpp synthetase/guanosine-3,5-bis(diphosphate) 3-pyrophosphohydrolase
LAC1533_RS05940	D-tyrosyl-tRNA(Tyr) deacylase	GSS_RS03925	D-tyrosyl-tRNA(Tyr) deacylase	Lacidipiscis_RS01230	D-tyrosyl-tRNA(Tyr) deacylase
LAC1533_RS05945	esterase	GSS_RS03915	alpha/beta hydrolase fold family protein	Lacidipiscis_RS01225	esterase
LAC1533_RS05950	haloacid dehalogenase	GSS_RS03910	haloacid dehalogenase-like hydrolase	Lacidipiscis_RS01220	haloacid dehalogenase
LAC1533_RS05955	N-acetylmuramoyl-L-alanine amidase	GSS_RS03905	N-acetylmuramoyl-L-alanine amidase	Lacidipiscis_RS02320	N-acetylmuramoyl-L-alanine amidase
LAC1533_RS05960	histidine--tRNA ligase	GSS_RS03900	histidine--tRNA ligase	Lacidipiscis_RS02315	histidine--tRNA ligase
LAC1533_RS05965	aspartate--tRNA ligase	GSS_RS03895	aspartate--tRNA ligase	Lacidipiscis_RS02310	aspartate--tRNA ligase
LAC1533_RS05970	YitT family protein	GSS_RS03890	YitT family protein	Lacidipiscis_RS02305	YitT family protein
LAC1533_RS05975	teichoic acid biosynthesis protein	GSS_RS03885	teichoic acid biosynthesis protein	Lacidipiscis_RS02300	teichoic acid biosynthesis protein
LAC1533_RS05980	deoxyribonuclease IV	GSS_RS03880	deoxyribonuclease IV	Lacidipiscis_RS02295	deoxyribonuclease IV
LAC1533_RS05985	kinase/pyrophosphorylase	GSS_RS03875	kinase/pyrophosphorylase	Lacidipiscis_RS02290	kinase/pyrophosphorylase
LAC1533_RS05990	30S ribosomal protein S21	GSS_RS03870	30S ribosomal protein S21	Lacidipiscis_RS02285	30S ribosomal protein S21
LAC1533_RS05995	GatB/YqeY domain-containing protein	GSS_RS03865	GatB/YqeY domain-containing protein	Lacidipiscis_RS02280	GatB/YqeY domain-containing protein
LAC1533_RS06000	PhoH family protein	GSS_RS03860	PhoH family protein	Lacidipiscis_RS04615	PhoH family protein
LAC1533_RS06005	rRNA maturation RNase YbeY	GSS_RS03855	rRNA maturation RNase YbeY	Lacidipiscis_RS04620	rRNA maturation RNase YbeY
LAC1533_RS06010	diacylglycerol kinase	GSS_RS03850	diacylglycerol kinase	Lacidipiscis_RS04625	UDP kinase
LAC1533_RS06015	GTPase Era	GSS_RS03845	GTPase Era	Lacidipiscis_RS04630	GTPase Era
LAC1533_RS06020	DNA repair protein RecO	GSS_RS03840	DNA repair protein RecO	Lacidipiscis_RS04635	DNA repair protein RecO
LAC1533_RS06025	glycine--tRNA ligase subunit alpha	GSS_RS03835	glycine--tRNA ligase subunit alpha	Lacidipiscis_RS07850	glycine--tRNA ligase subunit alpha
LAC1533_RS06030	glycine--tRNA ligase subunit beta	GSS_RS03830	glycine--tRNA ligase subunit beta	Lacidipiscis_RS07845	glycine--tRNA ligase subunit beta
LAC1533_RS06035	DNA primase	GSS_RS03825	DNA primase	Lacidipiscis_RS07840	DNA primase
LAC1533_RS06040	RNA polymerase sigma factor RpoD	GSS_RS03820	RNA polymerase sigma factor RpoD	Lacidipiscis_RS07835	RNA polymerase sigma factor RpoD
LAC1533_RS06045	tRNA (adenine(22)-N(1))-methyltransferase TrmK	GSS_RS03815	tRNA (adenine(22)-N(1))-methyltransferase TrmK	Lacidipiscis_RS11250	SAM-dependent methyltransferase
LAC1533_RS06050	Nif3-like dinuclear metal center hexameric protein	GSS_RS03810	Nif3-like dinuclear metal center hexameric protein	Lacidipiscis_RS11245	Nif3-like dinuclear metal center hexameric protein
LAC1533_RS06055	peptidase T	GSS_RS03805	peptidase T	Lacidipiscis_RS11240	peptidase T
LAC1533_RS06080	ATP-dependent chaperone ClpB	GSS_RS00005	chaperone ClpB	Lacidipiscis_RS11235	ATP-dependent chaperone ClpB
LAC1533_RS06100	DNA polymerase III subunit alpha	GSS_RS00020	DNA polymerase III subunit alpha	Lacidipiscis_RS10170	DNA polymerase III subunit alpha
LAC1533_RS06105	6-phosphofructokinase	GSS_RS00025	6-phosphofructokinase	Lacidipiscis_RS10165	6-phosphofructokinase
LAC1533_RS06110	pyruvate kinase	GSS_RS00030	pyruvate kinase	Lacidipiscis_RS10160	pyruvate kinase
LAC1533_RS06115	DUF441 domain-containing protein	GSS_RS00035	DUF441 domain-containing protein	Lacidipiscis_RS05240	DUF441 domain-containing protein
LAC1533_RS06120	S1 RNA-binding protein	GSS_RS00040	S1 RNA-binding protein	Lacidipiscis_RS05245	DNA-binding protein
LAC1533_RS06125	transcriptional repressor	GSS_RS00045	transcriptional repressor	Lacidipiscis_RS05250	transcriptional repressor
LAC1533_RS06130	site-specific tyrosine recombinase XerD	GSS_RS11455	site-specific tyrosine recombinase XerD	Lacidipiscis_RS05255	site-specific tyrosine recombinase XerD
LAC1533_RS06135	GNAT family N-acetyltransferase	GSS_RS00050	GNAT family N-acetyltransferase	Lacidipiscis_RS05260	GNAT family N-acetyltransferase
LAC1533_RS06140	rifampin ADP-ribosyl transferase	GSS_RS00055	rifampin ADP-ribosyl transferase	Lacidipiscis_RS05265	rifampin ADP-ribosyl transferase
LAC1533_RS06145	SMC-Scp complex subunit ScpB	GSS_RS00060	SMC-Scp complex subunit ScpB	Lacidipiscis_RS05270	SMC-Scp complex subunit ScpB
LAC1533_RS06150	rRNA pseudouridine synthase	GSS_RS00065	rRNA pseudouridine synthase	Lacidipiscis_RS05275	rRNA pseudouridine synthase
LAC1533_RS06155	hypothetical protein	GSS_RS00070	hypothetical protein	Lacidipiscis_RS05280	hypothetical protein
LAC1533_RS06160	ATP-dependent DNA helicase RecQ	GSS_RS00075	ATP-dependent DNA helicase RecQ	Lacidipiscis_RS05285	ATP-dependent DNA helicase RecQ
LAC1533_RS06165	LysM domain-containing protein	GSS_RS00080	LysM domain-containing protein	Lacidipiscis_RS03645	LysM domain-containing protein
LAC1533_RS06175	30S ribosomal protein S1	GSS_RS00090	30S ribosomal protein S1	Lacidipiscis_RS03635	30S ribosomal protein S1
LAC1533_RS06180	ribosome biogenesis GTPase Der	GSS_RS00095	ribosome biogenesis GTPase Der	Lacidipiscis_RS03630	ribosome biogenesis GTPase Der
LAC1533_RS06185	HU family DNA-binding protein	GSS_RS00100	HU family DNA-binding protein	Lacidipiscis_RS03625	HU family DNA-binding protein
LAC1533_RS06190	tetratricopeptide repeat protein	GSS_RS00105	tetratricopeptide repeat protein	Lacidipiscis_RS03615	tetratricopeptide repeat protein
LAC1533_RS06200	hypothetical protein	GSS_RS00110	hypothetical protein	Lacidipiscis_RS03610	hypothetical protein
LAC1533_RS06205	4-hydroxy-tetrahydrodipicolinate reductase	GSS_RS00115	4-hydroxy-tetrahydrodipicolinate reductase	Lacidipiscis_RS03595	4-hydroxy-tetrahydrodipicolinate reductase
LAC1533_RS06210	CCA tRNA nucleotidyltransferase	GSS_RS00120	CCA tRNA nucleotidyltransferase	Lacidipiscis_RS03590	CCA tRNA nucleotidyltransferase
LAC1533_RS06215	ABC transporter ATP-binding protein	GSS_RS00125	ABC transporter ATP-binding protein	Lacidipiscis_RS03585	ABC transporter ATP-binding protein
LAC1533_RS06220	thymidylate synthase	GSS_RS00130	thymidylate synthase	Lacidipiscis_RS03580	thymidylate synthase
LAC1533_RS06225	lipase	GSS_RS00135	lipase/acylhydrolase	Lacidipiscis_RS03575	lipase
LAC1533_RS06230	DUF2140 domain-containing protein	GSS_RS00140	DUF2140 domain-containing protein	Lacidipiscis_RS03570	DUF2140 domain-containing protein
LAC1533_RS06235	YozE family protein	GSS_RS13910	hypothetical protein	Lacidipiscis_RS03565	YozE family protein
LAC1533_RS06240	PDZ domain-containing protein	GSS_RS00155	PDZ domain-containing protein	Lacidipiscis_RS03555	PDZ domain-containing protein
LAC1533_RS06255	DNA-protecting protein DprA	GSS_RS00170	DNA-protecting protein DprA	Lacidipiscis_RS03540	DNA-protecting protein DprA
LAC1533_RS06260	type I DNA topoisomerase	GSS_RS00180	type I DNA topoisomerase	Lacidipiscis_RS03535	type I DNA topoisomerase
LAC1533_RS06265	tyrosine recombinase XerC	GSS_RS00185	tyrosine recombinase XerC	Lacidipiscis_RS03530	tyrosine recombinase XerC
LAC1533_RS06270	HslU--HslV peptidase proteolytic subunit	GSS_RS00190	HslU--HslV peptidase proteolytic subunit	Lacidipiscis_RS03525	HslU--HslV peptidase proteolytic subunit
LAC1533_RS06275	ATP-dependent protease ATPase subunit HslU	GSS_RS00195	ATP-dependent protease ATPase subunit HslU	Lacidipiscis_RS03520	ATP-dependent protease ATPase subunit HslU
LAC1533_RS06280	aldose 1-epimerase family protein	GSS_RS00200	aldose 1-epimerase family protein	Lacidipiscis_RS03515	aldose 1-epimerase family protein
LAC1533_RS06285	glycerol-3-phosphate acyltransferase	GSS_RS00205	glycerol-3-phosphate acyltransferase	Lacidipiscis_RS03510	glycerol-3-phosphate acyltransferase
LAC1533_RS06290	DNA topoisomerase IV subunit B	GSS_RS11985	DNA topoisomerase IV subunit B	Lacidipiscis_RS03505	DNA topoisomerase IV subunit B
LAC1533_RS06295	DNA topoisomerase IV subunit A	GSS_RS11995	hypothetical protein	Lacidipiscis_RS03500	DNA topoisomerase IV subunit A
LAC1533_RS06300	hypothetical protein	GSS_RS00225	hypothetical protein	Lacidipiscis_RS03495	hypothetical protein
LAC1533_RS06310	signal peptidase I	GSS_RS00235	signal peptidase I	Lacidipiscis_RS01700	signal peptidase I
LAC1533_RS06315	hypothetical protein	GSS_RS00240	hypothetical protein	Lacidipiscis_RS01705	hypothetical protein
LAC1533_RS06320	xylose isomerase	GSS_RS00245	xylose isomerase	Lacidipiscis_RS01710	xylose isomerase
LAC1533_RS06325	DegV family protein	GSS_RS00250	DegV family protein	Lacidipiscis_RS01715	DegV family protein
LAC1533_RS06330	MarR family transcriptional regulator	GSS_RS00255	MarR family transcriptional regulator	Lacidipiscis_RS01720	MarR family transcriptional regulator
LAC1533_RS06340	hypothetical protein	GSS_RS00265	hypothetical protein	Lacidipiscis_RS01730	hypothetical protein
LAC1533_RS06350	GNAT family N-acetyltransferase	GSS_RS00275	GNAT family N-acetyltransferase	Lacidipiscis_RS01740	GNAT family N-acetyltransferase
LAC1533_RS06355	glutamate racemase	GSS_RS00280	glutamate racemase	Lacidipiscis_RS01745	glutamate racemase
LAC1533_RS06360	aminotransferase class V-fold PLP-dependent enzyme	GSS_RS00285	aminotransferase class V-fold PLP-dependent enzyme	Lacidipiscis_RS01750	aminotransferase class V-fold PLP-dependent enzyme
LAC1533_RS06365	DeoR/GlpR transcriptional regulator	GSS_RS00290	DeoR/GlpR transcriptional regulator	Lacidipiscis_RS01755	DeoR/GlpR transcriptional regulator
LAC1533_RS06370	manganese-dependent inorganic pyrophosphatase	GSS_RS00295	manganese-dependent inorganic pyrophosphatase	Lacidipiscis_RS01760	manganese-dependent inorganic pyrophosphatase
LAC1533_RS06375	LysR family transcriptional regulator	GSS_RS00300	LysR family transcriptional regulator	Lacidipiscis_RS01765	LysR family transcriptional regulator
LAC1533_RS06385	dihydroorotate dehydrogenase	GSS_RS00320	dihydroorotate dehydrogenase	Lacidipiscis_RS01775	dihydroorotate dehydrogenase
LAC1533_RS06395	carbamoyl phosphate synthase small subunit	GSS_RS00330	carbamoyl-phosphate synthase small subunit	Lacidipiscis_RS01785	carbamoyl phosphate synthase small subunit
LAC1533_RS06400	dihydroorotase	GSS_RS00335	dihydroorotase	Lacidipiscis_RS01790	dihydroorotase
LAC1533_RS06415	bifunctional pyr operon transcriptional regulator/uracil phosphoribosyltransferase PyrR	GSS_RS00350	bifunctional pyr operon transcriptional regulator/uracil phosphoribosyltransferase PyrR	Lacidipiscis_RS01805	bifunctional pyr operon transcriptional regulator/uracil phosphoribosyltransferase PyrR
LAC1533_RS06420	RluA family pseudouridine synthase	GSS_RS00355	RluA family pseudouridine synthase	Lacidipiscis_RS01810	RluA family pseudouridine synthase
LAC1533_RS06425	signal peptidase II	GSS_RS00360	signal peptidase II	Lacidipiscis_RS01815	signal peptidase II
LAC1533_RS06430	formate--tetrahydrofolate ligase	GSS_RS00365	formate--tetrahydrofolate ligase	Lacidipiscis_RS01820	formate--tetrahydrofolate ligase
LAC1533_RS06435	hypothetical protein	GSS_RS00370	hypothetical protein	Lacidipiscis_RS01825	hypothetical protein
LAC1533_RS06460	cell division regulator GpsB	GSS_RS00380	cell division regulator GpsB	Lacidipiscis_RS01840	cell division regulator GpsB
LAC1533_RS06465	DUF1273 domain-containing protein	GSS_RS12025	DUF1273 domain-containing protein	Lacidipiscis_RS01845	DUF1273 domain-containing protein
LAC1533_RS06470	Holliday junction resolvase RecU	GSS_RS00390	Holliday junction resolvase RecU	Lacidipiscis_RS01850	Holliday junction resolvase RecU
LAC1533_RS06480	endonuclease III	GSS_RS00410	endonuclease III	Lacidipiscis_RS10195	endonuclease III
LAC1533_RS06485	DnaD domain protein	GSS_RS00415	DnaD domain protein	Lacidipiscis_RS10200	DnaD domain protein
LAC1533_RS06490	asparagine--tRNA ligase	GSS_RS00420	asparagine--tRNA ligase	Lacidipiscis_RS10205	asparagine--tRNA ligase
LAC1533_RS06495	pyridoxal phosphate-dependent aminotransferase	GSS_RS00425	pyridoxal phosphate-dependent aminotransferase	Lacidipiscis_RS10210	pyridoxal phosphate-dependent aminotransferase
LAC1533_RS06500	hypothetical protein	GSS_RS00430	hypothetical protein	Lacidipiscis_RS10215	hypothetical protein
LAC1533_RS06505	hypothetical protein	GSS_RS13620	hypothetical protein	Lacidipiscis_RS10220	hypothetical protein
LAC1533_RS06510	mevalonate kinase	GSS_RS00440	mevalonate kinase	Lacidipiscis_RS10225	mevalonate kinase
LAC1533_RS06520	phosphomevalonate kinase	GSS_RS00450	phosphomevalonate kinase	Lacidipiscis_RS10235	phosphomevalonate kinase
LAC1533_RS06525	type 2 isopentenyl-diphosphate Delta-isomerase	GSS_RS00455	type 2 isopentenyl-diphosphate Delta-isomerase	Lacidipiscis_RS10240	type 2 isopentenyl-diphosphate Delta-isomerase
LAC1533_RS06530	RNA methyltransferase	GSS_RS00460	23S rRNA methyltransferase	Lacidipiscis_RS10245	RNA methyltransferase
LAC1533_RS06535	hypothetical protein	GSS_RS13625	hypothetical protein	Lacidipiscis_RS10250	hypothetical protein
LAC1533_RS06540	metal-sulfur cluster assembly factor	GSS_RS00470	metal-sulfur cluster assembly factor	Lacidipiscis_RS10255	metal-sulfur cluster assembly factor
LAC1533_RS06545	S9 family serine peptidase	GSS_RS00475	S9 family serine peptidase	Lacidipiscis_RS10260	S9 family serine peptidase
LAC1533_RS06550	Cof-type HAD-IIB family hydrolase	GSS_RS00485	Cof-type HAD-IIB family hydrolase	Lacidipiscis_RS10265	Cof-type HAD-IIB family hydrolase
LAC1533_RS06555	diaminopimelate decarboxylase	GSS_RS00490	diaminopimelate decarboxylase	Lacidipiscis_RS10270	diaminopimelate decarboxylase
LAC1533_RS06565	hypothetical protein	GSS_RS13630	hypothetical protein	Lacidipiscis_RS10280	hypothetical protein
LAC1533_RS06580	elongation factor Ts	GSS_RS00505	elongation factor Ts	Lacidipiscis_RS10285	elongation factor Ts
LAC1533_RS06585	30S ribosomal protein S2	GSS_RS00510	30S ribosomal protein S2	Lacidipiscis_RS10290	30S ribosomal protein S2
LAC1533_RS06590	lactate dehydrogenase	GSS_RS00515	lactate dehydrogenase	Lacidipiscis_RS10295	lactate dehydrogenase
LAC1533_RS06595	GIY-YIG nuclease family protein	GSS_RS00520	GIY-YIG nuclease family protein	Lacidipiscis_RS10300	GIY-YIG nuclease family protein
LAC1533_RS06605	1-acyl-sn-glycerol-3-phosphate acyltransferase	GSS_RS00530	1-acyl-sn-glycerol-3-phosphate acyltransferase	Lacidipiscis_RS10310	1-acyl-sn-glycerol-3-phosphate acyltransferase
LAC1533_RS06610	hypothetical protein	GSS_RS00535	hypothetical protein	Lacidipiscis_RS10315	hypothetical protein
LAC1533_RS06615	DUF896 family protein	GSS_RS00540	DUF896 family protein	Lacidipiscis_RS10320	DUF896 family protein
LAC1533_RS06620	transcriptional repressor LexA	GSS_RS00545	transcriptional repressor LexA	Lacidipiscis_RS10325	transcriptional repressor LexA
LAC1533_RS06635	ArgR family transcriptional regulator	GSS_RS00555	ArgR family transcriptional regulator	Lacidipiscis_RS10335	ArgR family transcriptional regulator
LAC1533_RS06640	TlyA family rRNA (cytidine-2-O)-methyltransferase	GSS_RS00560	TlyA family rRNA (cytidine-2-O)-methyltransferase	Lacidipiscis_RS10340	TlyA family rRNA (cytidine-2-O)-methyltransferase
LAC1533_RS06645	polyprenyl synthetase family protein	GSS_RS00565	polyprenyl synthetase family protein	Lacidipiscis_RS10345	polyprenyl synthetase family protein
LAC1533_RS06650	exodeoxyribonuclease VII small subunit	GSS_RS00570	exodeoxyribonuclease VII small subunit	Lacidipiscis_RS10350	exodeoxyribonuclease VII small subunit
LAC1533_RS06655	exodeoxyribonuclease VII large subunit	GSS_RS00575	exodeoxyribonuclease VII large subunit	Lacidipiscis_RS10355	exodeoxyribonuclease VII large subunit
LAC1533_RS06660	bifunctional methylenetetrahydrofolate dehydrogenase/methenyltetrahydrofolate cyclohydrolase FolD	GSS_RS00580	bifunctional methylenetetrahydrofolate dehydrogenase/methenyltetrahydrofolate cyclohydrolase	Lacidipiscis_RS10360	bifunctional methylenetetrahydrofolate dehydrogenase/methenyltetrahydrofolate cyclohydrolase FolD
LAC1533_RS06665	transcription antitermination factor NusB	GSS_RS00585	transcription antitermination factor NusB	Lacidipiscis_RS10365	transcription antitermination factor NusB
LAC1533_RS06670	Asp23/Gls24 family envelope stress response protein	GSS_RS00590	Asp23/Gls24 family envelope stress response protein	Lacidipiscis_RS10370	Asp23/Gls24 family envelope stress response protein
LAC1533_RS06675	elongation factor P	GSS_RS00595	elongation factor P	Lacidipiscis_RS10375	elongation factor P
LAC1533_RS06685	50S ribosomal protein L27	GSS_RS00605	50S ribosomal protein L27	Lacidipiscis_RS10385	50S ribosomal protein L27
LAC1533_RS06690	ribosomal-processing cysteine protease Prp	GSS_RS00610	ribosomal-processing cysteine protease Prp	Lacidipiscis_RS10390	ribosomal-processing cysteine protease Prp
LAC1533_RS06695	50S ribosomal protein L21	GSS_RS00615	50S ribosomal protein L21	Lacidipiscis_RS10395	50S ribosomal protein L21
LAC1533_RS06705	1-acyl-sn-glycerol-3-phosphate acyltransferase	GSS_RS12100	1-acyl-sn-glycerol-3-phosphate acyltransferase	Lacidipiscis_RS10405	1-acyl-sn-glycerol-3-phosphate acyltransferase
LAC1533_RS06720	hypothetical protein	GSS_RS00920	hypothetical protein	Lacidipiscis_RS08600	hypothetical protein
LAC1533_RS06725	hypothetical protein	GSS_RS00930	hypothetical protein	Lacidipiscis_RS02095	hypothetical protein
LAC1533_RS06730	hypothetical protein	GSS_RS00935	hypothetical protein	Lacidipiscis_RS02100	hypothetical protein
LAC1533_RS06735	exonuclease SbcC	GSS_RS00940	hypothetical protein	Lacidipiscis_RS02105	hypothetical protein
LAC1533_RS06740	hypothetical protein	GSS_RS00950	hypothetical protein	Lacidipiscis_RS02110	hypothetical protein
LAC1533_RS06755	acylphosphatase	GSS_RS00960	acylphosphatase	Lacidipiscis_RS02120	acylphosphatase
LAC1533_RS06770	DNA-binding response regulator	GSS_RS00975	DNA-binding response regulator	Lacidipiscis_RS02135	DNA-binding response regulator
LAC1533_RS06780	phosphogluconate dehydrogenase (NADP(+)-dependent, decarboxylating)	GSS_RS00980	phosphogluconate dehydrogenase (NADP(+)-dependent, decarboxylating)	Lacidipiscis_RS02140	phosphogluconate dehydrogenase (NADP(+)-dependent, decarboxylating)
LAC1533_RS06790	trigger factor	GSS_RS12125	trigger factor	Lacidipiscis_RS02150	trigger factor
LAC1533_RS06795	elongation factor Tu	GSS_RS01000	elongation factor Tu	Lacidipiscis_RS02155	elongation factor Tu
LAC1533_RS06800	hypothetical protein	GSS_RS01015	hypothetical protein	Lacidipiscis_RS02160	hypothetical protein
LAC1533_RS06805	ribonuclease J	GSS_RS01020	RNase J family beta-CASP ribonuclease	Lacidipiscis_RS02165	ribonuclease J
LAC1533_RS06810	4-hydroxy-tetrahydrodipicolinate synthase	GSS_RS01025	4-hydroxy-tetrahydrodipicolinate synthase	Lacidipiscis_RS02170	4-hydroxy-tetrahydrodipicolinate synthase
LAC1533_RS06815	aspartate-semialdehyde dehydrogenase	GSS_RS01030	aspartate-semialdehyde dehydrogenase	Lacidipiscis_RS02175	aspartate-semialdehyde dehydrogenase
LAC1533_RS06825	30S ribosomal protein S15	GSS_RS01045	30S ribosomal protein S15	Lacidipiscis_RS02185	30S ribosomal protein S15
LAC1533_RS06830	30S ribosomal protein S20	GSS_RS01050	30S ribosomal protein S20	Lacidipiscis_RS02195	30S ribosomal protein S20
LAC1533_RS06835	DNA polymerase III subunit delta	GSS_RS13470	DNA polymerase III subunit delta	Lacidipiscis_RS02200	DNA polymerase III subunit delta
LAC1533_RS06840	DNA internalization-related competence protein ComEC/Rec2	GSS_RS12145	MBL fold metallo-hydrolase	Lacidipiscis_RS02205	DNA internalization-related competence protein ComEC/Rec2
LAC1533_RS06845	ComE operon protein 2	GSS_RS01070	ComE operon protein 2	Lacidipiscis_RS02210	ComE operon protein 2
LAC1533_RS06850	ComE operon protein 1	GSS_RS01075	ComE operon protein 1	Lacidipiscis_RS02215	ComE operon protein 1
LAC1533_RS06855	PDZ domain-containing protein	GSS_RS01080	PDZ domain-containing protein	Lacidipiscis_RS02220	PDZ domain-containing protein
LAC1533_RS06860	pantetheine-phosphate adenylyltransferase	GSS_RS01090	pantetheine-phosphate adenylyltransferase	Lacidipiscis_RS02225	pantetheine-phosphate adenylyltransferase
LAC1533_RS06870	DUF2129 domain-containing protein	GSS_RS01100	DUF2129 domain-containing protein	Lacidipiscis_RS02235	DUF2129 domain-containing protein
LAC1533_RS06875	pyruvate carboxylase	GSS_RS12155	pyruvate carboxylase	Lacidipiscis_RS02240	pyruvate carboxylase
LAC1533_RS06880	FtsW/RodA/SpoVE family cell cycle protein	GSS_RS01115	FtsW/RodA/SpoVE family cell cycle protein	Lacidipiscis_RS02245	FtsW/RodA/SpoVE family cell cycle protein
LAC1533_RS06885	DUF1507 domain-containing protein	GSS_RS01120	DUF1507 domain-containing protein	Lacidipiscis_RS02250	DUF1507 domain-containing protein
LAC1533_RS06900	inositol monophosphatase family protein	GSS_RS01130	inositol monophosphatase family protein	Lacidipiscis_RS05230	inositol monophosphatase family protein
LAC1533_RS06905	hypothetical protein	GSS_RS01135	hypothetical protein	Lacidipiscis_RS05225	hypothetical protein
LAC1533_RS06910	lactate dehydrogenase	GSS_RS01140	malate dehydrogenase	Lacidipiscis_RS05220	malate dehydrogenase
LAC1533_RS06920	peptide deformylase	GSS_RS01155	peptide deformylase	Lacidipiscis_RS03290	peptide deformylase
LAC1533_RS06925	hypothetical protein	GSS_RS01160	hypothetical protein	Lacidipiscis_RS03295	hypothetical protein
LAC1533_RS06935	DUF1447 domain-containing protein	GSS_RS01165	DUF1447 domain-containing protein	Lacidipiscis_RS03310	DUF1447 domain-containing protein
LAC1533_RS06940	ribonuclease J	GSS_RS01170	ribonuclease J	Lacidipiscis_RS03315	ribonuclease J
LAC1533_RS06945	transcriptional regulator	GSS_RS01175	transcriptional regulator	Lacidipiscis_RS03320	transcriptional regulator
LAC1533_RS06955	ATP-dependent RecD-like DNA helicase	GSS_RS01180	ATP-dependent RecD-like DNA helicase	Lacidipiscis_RS03325	ATP-dependent RecD-like DNA helicase
LAC1533_RS06960	tetratricopeptide repeat protein	GSS_RS01185	tetratricopeptide repeat protein	Lacidipiscis_RS03330	tetratricopeptide repeat protein
LAC1533_RS06965	histidine phosphatase family protein	GSS_RS01190	histidine phosphatase family protein	Lacidipiscis_RS03335	histidine phosphatase family protein
LAC1533_RS06970	tRNA 2-thiouridine(34) synthase MnmA	GSS_RS01195	tRNA 2-thiouridine(34) synthase MnmA	Lacidipiscis_RS03340	tRNA 2-thiouridine(34) synthase MnmA
LAC1533_RS06975	cysteine desulfurase	GSS_RS01200	cysteine desulfurase	Lacidipiscis_RS03345	cysteine desulfurase
LAC1533_RS06985	5-methylthioadenosine/adenosylhomocysteine nucleosidase	GSS_RS01210	5-methylthioadenosine/adenosylhomocysteine nucleosidase	Lacidipiscis_RS03355	5-methylthioadenosine/adenosylhomocysteine nucleosidase
LAC1533_RS06990	hypothetical protein	GSS_RS01215	hypothetical protein	Lacidipiscis_RS03360	hypothetical protein
LAC1533_RS06995	NUDIX hydrolase	GSS_RS01220	NUDIX hydrolase	Lacidipiscis_RS03365	NUDIX hydrolase
LAC1533_RS07000	diaminopimelate epimerase	GSS_RS12170	diaminopimelate epimerase	Lacidipiscis_RS03370	diaminopimelate epimerase
LAC1533_RS07005	isoleucine--tRNA ligase	GSS_RS01230	isoleucine--tRNA ligase	Lacidipiscis_RS03375	isoleucine--tRNA ligase
LAC1533_RS07010	DivIVA domain-containing protein	GSS_RS01235	DivIVA domain-containing protein	Lacidipiscis_RS03380	DivIVA domain-containing protein
LAC1533_RS07020	YggT family protein	GSS_RS01245	YggT family protein	Lacidipiscis_RS03390	YggT family protein
LAC1533_RS07025	cell division protein SepF	GSS_RS01250	cell division protein SepF	Lacidipiscis_RS03395	cell division protein SepF
LAC1533_RS07030	cell division protein FtsZ	GSS_RS01255	cell division protein FtsZ	Lacidipiscis_RS03400	cell division protein FtsZ
LAC1533_RS07035	cell division protein FtsA	GSS_RS01260	cell division protein FtsA	Lacidipiscis_RS03405	cell division protein FtsA
LAC1533_RS07040	hypothetical protein	GSS_RS13645	hypothetical protein	Lacidipiscis_RS03410	hypothetical protein
LAC1533_RS07050	UDP-N-acetylmuramoyl-L-alanine--D-glutamate ligase	GSS_RS01270	UDP-N-acetylmuramoyl-L-alanine--D-glutamate ligase	Lacidipiscis_RS03420	UDP-N-acetylmuramoyl-L-alanine--D-glutamate ligase
LAC1533_RS07055	phospho-N-acetylmuramoyl-pentapeptide- transferase	GSS_RS01275	phospho-N-acetylmuramoyl-pentapeptide- transferase	Lacidipiscis_RS03425	phospho-N-acetylmuramoyl-pentapeptide- transferase
LAC1533_RS07060	PASTA domain-containing protein	GSS_RS01280	PASTA domain-containing protein	Lacidipiscis_RS03430	PASTA domain-containing protein
LAC1533_RS07065	cell division protein FtsL	GSS_RS01285	cell division protein FtsL	Lacidipiscis_RS03435	cell division protein FtsL
LAC1533_RS07070	16S rRNA (cytosine(1402)-N(4))-methyltransferase RsmH	GSS_RS01290	16S rRNA (cytosine(1402)-N(4))-methyltransferase RsmH	Lacidipiscis_RS03440	16S rRNA (cytosine(1402)-N(4))-methyltransferase RsmH
LAC1533_RS07075	transcriptional regulator MraZ	GSS_RS01295	transcriptional regulator MraZ	Lacidipiscis_RS03445	transcriptional regulator MraZ
LAC1533_RS07080	DUF3397 domain-containing protein	GSS_RS01300	DUF3397 domain-containing protein	Lacidipiscis_RS07355	DUF3397 domain-containing protein
LAC1533_RS07090	DUF4044 domain-containing protein	GSS_RS13945	DUF4044 domain-containing protein	Lacidipiscis_RS07360	DUF4044 domain-containing protein
LAC1533_RS07100	alpha/beta hydrolase	GSS_RS01305	alpha/beta hydrolase	Lacidipiscis_RS07365	alpha/beta hydrolase
LAC1533_RS07105	cardiolipin synthase	GSS_RS01310	cardiolipin synthase	Lacidipiscis_RS07370	cardiolipin synthase
LAC1533_RS07110	septum site-determining protein MinD	GSS_RS01320	septum site-determining protein MinD	Lacidipiscis_RS07375	septum site-determining protein MinD
LAC1533_RS07115	cell division inhibitor	GSS_RS01325	cell division inhibitor	Lacidipiscis_RS07380	cell division inhibitor
LAC1533_RS07125	rod shape-determining protein MreC	GSS_RS01335	rod shape-determining protein MreC	Lacidipiscis_RS07390	rod shape-determining protein MreC
LAC1533_RS07130	rod shape-determining protein	GSS_RS01340	rod shape-determining protein	Lacidipiscis_RS07395	rod shape-determining protein
LAC1533_RS07135	cold-shock protein	GSS_RS01345	cold-shock protein	Lacidipiscis_RS07400	cold-shock protein
LAC1533_RS07140	DNA repair protein	GSS_RS01350	DNA repair protein	Lacidipiscis_RS07405	DNA repair protein
LAC1533_RS07150	bifunctional folylpolyglutamate synthase/dihydrofolate synthase	GSS_RS01360	bifunctional folylpolyglutamate synthase/dihydrofolate synthase	Lacidipiscis_RS07415	bifunctional folylpolyglutamate synthase/dihydrofolate synthase
LAC1533_RS07155	valine--tRNA ligase	GSS_RS01365	valine--tRNA ligase	Lacidipiscis_RS07420	valine--tRNA ligase
LAC1533_RS07165	tRNA 4-thiouridine(8) synthase ThiI	GSS_RS01370	tRNA 4-thiouridine(8) synthase ThiI	Lacidipiscis_RS07425	tRNA 4-thiouridine(8) synthase ThiI
LAC1533_RS07170	cysteine desulfurase	GSS_RS01375	cysteine desulfurase	Lacidipiscis_RS07430	cysteine desulfurase
LAC1533_RS07175	septation ring formation regulator EzrA	GSS_RS01380	septation ring formation regulator EzrA	Lacidipiscis_RS07435	septation ring formation regulator EzrA
LAC1533_RS07185	30S ribosomal protein S4	GSS_RS01390	30S ribosomal protein S4	Lacidipiscis_RS07445	30S ribosomal protein S4
LAC1533_RS07190	replication-associated recombination protein A	GSS_RS01395	replication-associated recombination protein A	Lacidipiscis_RS07450	replication-associated recombination protein A
LAC1533_RS07200	DNA-3-methyladenine glycosylase I	GSS_RS01405	DNA-3-methyladenine glycosylase I	Lacidipiscis_RS07460	DNA-3-methyladenine glycosylase I
LAC1533_RS07205	aminoglycoside phosphotransferase family protein	GSS_RS01410	aminoglycoside phosphotransferase family protein	Lacidipiscis_RS03460	aminoglycoside phosphotransferase family protein
LAC1533_RS07210	amino acid permease	GSS_RS01415	amino acid permease	Lacidipiscis_RS08405	amino acid permease
LAC1533_RS07290	antitoxin RelB	GSS_RS11150	antitoxin RelB	Lacidipiscis_RS12870	RelB
LAC1533_RS07435	Fe-S cluster assembly protein SufB	GSS_RS10410	Fe-S cluster assembly protein SufB	Lacidipiscis_RS03120	Fe-S cluster assembly protein SufB
LAC1533_RS07440	SUF system NifU family Fe-S cluster assembly protein	GSS_RS10415	SUF system NifU family Fe-S cluster assembly protein	Lacidipiscis_RS03125	SUF system NifU family Fe-S cluster assembly protein
LAC1533_RS07445	cysteine desulfurase	GSS_RS10420	cysteine desulfurase	Lacidipiscis_RS03130	cysteine desulfurase
LAC1533_RS07450	Fe-S cluster assembly protein SufD	GSS_RS10425	Fe-S cluster assembly protein SufD	Lacidipiscis_RS03135	Fe-S cluster assembly protein SufD
LAC1533_RS07455	Fe-S cluster assembly ATPase SufC	GSS_RS10430	Fe-S cluster assembly ATPase SufC	Lacidipiscis_RS03140	Fe-S cluster assembly ATPase SufC
LAC1533_RS07460	arsenate reductase family protein	GSS_RS10435	arsenate reductase family protein	Lacidipiscis_RS03145	arsenate reductase family protein
LAC1533_RS07465	rod shape-determining protein RodA	GSS_RS10445	rod shape-determining protein	Lacidipiscis_RS03150	rod shape-determining protein RodA
LAC1533_RS07470	DUF2969 domain-containing protein	GSS_RS10450	DUF2969 domain-containing protein	Lacidipiscis_RS03155	DUF2969 domain-containing protein
LAC1533_RS07475	membrane protein insertion efficiency factor YidD	GSS_RS10455	membrane protein insertion efficiency factor YidD	Lacidipiscis_RS03160	membrane protein insertion efficiency factor YidD
LAC1533_RS07480	rod shape-determining protein	GSS_RS10460	rod shape-determining protein	Lacidipiscis_RS03165	rod shape-determining protein
LAC1533_RS07485	UDP-N-acetylglucosamine 1-carboxyvinyltransferase	GSS_RS10465	UDP-N-acetylglucosamine 1-carboxyvinyltransferase	Lacidipiscis_RS03170	UDP-N-acetylglucosamine 1-carboxyvinyltransferase
LAC1533_RS07490	membrane protein	GSS_RS10470	membrane protein	Lacidipiscis_RS03175	membrane protein
LAC1533_RS07500	F0F1 ATP synthase subunit epsilon	GSS_RS10475	F0F1 ATP synthase subunit epsilon	Lacidipiscis_RS06965	F0F1 ATP synthase subunit epsilon
LAC1533_RS07505	F0F1 ATP synthase subunit beta	GSS_RS10480	F0F1 ATP synthase subunit beta	Lacidipiscis_RS06960	F0F1 ATP synthase subunit beta
LAC1533_RS07510	F0F1 ATP synthase subunit gamma	GSS_RS10485	F0F1 ATP synthase subunit gamma	Lacidipiscis_RS06955	F0F1 ATP synthase subunit gamma
LAC1533_RS07515	F0F1 ATP synthase subunit alpha	GSS_RS10490	F0F1 ATP synthase subunit alpha	Lacidipiscis_RS06950	F0F1 ATP synthase subunit alpha
LAC1533_RS07520	F0F1 ATP synthase subunit delta	GSS_RS10500	F0F1 ATP synthase subunit delta	Lacidipiscis_RS06945	F0F1 ATP synthase subunit delta
LAC1533_RS07525	ATP synthase F0 subunit B	GSS_RS10505	ATP synthase F0 subunit B	Lacidipiscis_RS06940	ATP synthase F0 subunit B
LAC1533_RS07530	F0F1 ATP synthase subunit C	GSS_RS10510	F0F1 ATP synthase subunit C	Lacidipiscis_RS06935	F0F1 ATP synthase subunit C
LAC1533_RS07535	F0F1 ATP synthase subunit A	GSS_RS10515	F0F1 ATP synthase subunit A	Lacidipiscis_RS06930	F0F1 ATP synthase subunit A
LAC1533_RS07540	uracil phosphoribosyltransferase	GSS_RS10520	uracil phosphoribosyltransferase	Lacidipiscis_RS06925	uracil phosphoribosyltransferase
LAC1533_RS07545	threonylcarbamoyl-AMP synthase	GSS_RS10525	threonylcarbamoyl-AMP synthase	Lacidipiscis_RS06920	threonylcarbamoyl-AMP synthase
LAC1533_RS07550	peptide chain release factor N(5)-glutamine methyltransferase	GSS_RS10530	peptide chain release factor N(5)-glutamine methyltransferase	Lacidipiscis_RS06915	peptide chain release factor N(5)-glutamine methyltransferase
LAC1533_RS07560	thymidine kinase	GSS_RS10540	thymidine kinase	Lacidipiscis_RS06905	thymidine kinase
LAC1533_RS07565	DUF1727 domain-containing protein	GSS_RS10545	DUF1727 domain-containing protein	Lacidipiscis_RS06895	DUF1727 domain-containing protein
LAC1533_RS07570	glutamine amidotransferase	GSS_RS10550	cobyric acid synthase	Lacidipiscis_RS06890	glutamine amidotransferase
LAC1533_RS07585	mannose-6-phosphate isomerase, class I	GSS_RS10555	mannose-6-phosphate isomerase, class I	Lacidipiscis_RS06885	mannose-6-phosphate isomerase, class I
LAC1533_RS07595	hypothetical protein	GSS_RS10565	hypothetical protein	Lacidipiscis_RS06880	hypothetical protein
LAC1533_RS07600	histidine phosphatase family protein	GSS_RS10570	histidine phosphatase family protein	Lacidipiscis_RS06875	histidine phosphatase family protein
LAC1533_RS07605	hypothetical protein	GSS_RS10575	hypothetical protein	Lacidipiscis_RS06870	hypothetical protein
LAC1533_RS07660	hypothetical protein	GSS_RS11245	hypothetical protein	Lacidipiscis_RS06685	hypothetical protein
LAC1533_RS07670	XTP/dITP diphosphatase	GSS_RS11255	XTP/dITP diphosphatase	Lacidipiscis_RS06675	XTP/dITP diphosphatase
LAC1533_RS07675	DUF2507 domain-containing protein	GSS_RS11260	DUF2507 domain-containing protein	Lacidipiscis_RS06670	DUF2507 domain-containing protein
LAC1533_RS07695	endonuclease MutS2	GSS_RS09760	endonuclease MutS2	Lacidipiscis_RS06665	endonuclease MutS2
LAC1533_RS07700	CvpA family protein	GSS_RS09755	CvpA family protein	Lacidipiscis_RS06660	CvpA family protein
LAC1533_RS07705	cell division protein ZapA	GSS_RS09750	cell division protein ZapA	Lacidipiscis_RS06655	cell division protein ZapA
LAC1533_RS07710	DUF1292 domain-containing protein	GSS_RS09745	DUF1292 domain-containing protein	Lacidipiscis_RS06225	DUF1292 domain-containing protein
LAC1533_RS07715	Holliday junction resolvase RuvX	GSS_RS09740	Holliday junction resolvase RuvX	Lacidipiscis_RS06230	Holliday junction resolvase RuvX
LAC1533_RS07720	IreB family regulatory phosphoprotein	GSS_RS09735	IreB family regulatory phosphoprotein	Lacidipiscis_RS06235	IreB family regulatory phosphoprotein
LAC1533_RS07725	alanine--tRNA ligase	GSS_RS09725	alanine--tRNA ligase	Lacidipiscis_RS06240	alanine--tRNA ligase
LAC1533_RS07730	ATP-dependent helicase	GSS_RS09720	ATP-dependent helicase	Lacidipiscis_RS06245	ATP-dependent helicase
LAC1533_RS07735	bifunctional oligoribonuclease/PAP phosphatase NrnA	GSS_RS09715	bifunctional oligoribonuclease/PAP phosphatase NrnA	Lacidipiscis_RS06250	bifunctional oligoribonuclease/PAP phosphatase NrnA
LAC1533_RS07740	DNA polymerase IV	GSS_RS09710	DNA polymerase IV	Lacidipiscis_RS13155	DNA polymerase IV
LAC1533_RS07750	enoyl-[acyl-carrier-protein] reductase FabI	GSS_RS09690	enoyl-[acyl-carrier-protein] reductase FabI	Lacidipiscis_RS13145	enoyl-[acyl-carrier-protein] reductase FabI
LAC1533_RS07755	acetyl-CoA carboxylase carboxyl transferase subunit alpha	GSS_RS09685	acetyl-CoA carboxylase carboxyl transferase subunit alpha	Lacidipiscis_RS13140	acetyl-CoA carboxylase carboxyl transferase subunit alpha
LAC1533_RS07760	acetyl-CoA carboxylase carboxyltransferase subunit beta	GSS_RS09680	acetyl-CoA carboxylase carboxyltransferase subunit beta	Lacidipiscis_RS13135	acetyl-CoA carboxylase carboxyltransferase subunit beta
LAC1533_RS07765	acetyl-CoA carboxylase biotin carboxylase subunit	GSS_RS09675	acetyl-CoA carboxylase biotin carboxylase subunit	Lacidipiscis_RS13130	acetyl-CoA carboxylase biotin carboxylase subunit
LAC1533_RS07770	3-hydroxyacyl-[acyl-carrier-protein] dehydratase FabZ	GSS_RS09670	3-hydroxyacyl-[acyl-carrier-protein] dehydratase FabZ	Lacidipiscis_RS13125	3-hydroxyacyl-[acyl-carrier-protein] dehydratase FabZ
LAC1533_RS07775	acetyl-CoA carboxylase biotin carboxyl carrier protein	GSS_RS09665	acetyl-CoA carboxylase biotin carboxyl carrier protein	Lacidipiscis_RS13120	acetyl-CoA carboxylase biotin carboxyl carrier protein
LAC1533_RS07780	beta-ketoacyl-[acyl-carrier-protein] synthase II	GSS_RS09660	beta-ketoacyl-[acyl-carrier-protein] synthase II	Lacidipiscis_RS13115	beta-ketoacyl-[acyl-carrier-protein] synthase II
LAC1533_RS07790	3-oxoacyl-[acyl-carrier-protein] reductase	GSS_RS09655	3-oxoacyl-[acyl-carrier-protein] reductase	Lacidipiscis_RS13105	3-oxoacyl-[acyl-carrier-protein] reductase
LAC1533_RS07795	ACP S-malonyltransferase	GSS_RS09650	ACP S-malonyltransferase	Lacidipiscis_RS13100	ACP S-malonyltransferase
LAC1533_RS07800	acyl carrier protein	GSS_RS09645	acyl carrier protein	Lacidipiscis_RS13095	acyl carrier protein
LAC1533_RS07805	ketoacyl-ACP synthase III	GSS_RS09640	ketoacyl-ACP synthase III	Lacidipiscis_RS13090	ketoacyl-ACP synthase III
LAC1533_RS07810	MarR family transcriptional regulator	GSS_RS09635	MarR family transcriptional regulator	Lacidipiscis_RS13085	MarR family transcriptional regulator
LAC1533_RS07815	3-hydroxyacyl-[acyl-carrier-protein] dehydratase FabZ	GSS_RS09630	3-hydroxyacyl-[acyl-carrier-protein] dehydratase FabZ	Lacidipiscis_RS13080	3-hydroxyacyl-[acyl-carrier-protein] dehydratase FabZ
LAC1533_RS07820	thiol peroxidase	GSS_RS09625	thiol peroxidase	Lacidipiscis_RS13075	thiol peroxidase
LAC1533_RS07825	preprotein translocase subunit YajC	GSS_RS09620	preprotein translocase subunit YajC	Lacidipiscis_RS07910	preprotein translocase subunit YajC
LAC1533_RS07830	tRNA guanosine(34) transglycosylase Tgt	GSS_RS09615	tRNA guanosine(34) transglycosylase Tgt	Lacidipiscis_RS07905	tRNA guanosine(34) transglycosylase Tgt
LAC1533_RS07840	tRNA preQ1(34) S-adenosylmethionine ribosyltransferase-isomerase QueA	GSS_RS09605	tRNA preQ1(34) S-adenosylmethionine ribosyltransferase-isomerase QueA	Lacidipiscis_RS07900	tRNA preQ1(34) S-adenosylmethionine ribosyltransferase-isomerase QueA
LAC1533_RS07845	Holliday junction branch migration DNA helicase RuvB	GSS_RS09600	Holliday junction branch migration DNA helicase RuvB	Lacidipiscis_RS07895	Holliday junction branch migration DNA helicase RuvB
[truncated: 563 more rows]

## Sheet: Supplementary table S4C
Supplementary table S4C. Singletons of the three L. acidipiscis strains calculated with the EDGAR software.
[truncated: 199 more rows]
